# Supplementary material for: Microbiome interactions increase plant haplotype richness
Source: Research Square preprint supplement (doi:10.21203/rs.3.rs-5130034/v1), 2024-10-08
Supplement: Supplementary file 1 [file 28875d2192416891574270f0.xlsx]

## Sheet: README
Sheet	Contents
Accession data	Population, sampling position, climate and phenotypic data for plant accessions
GWAS traits	All used GWAS traits and whether they are a bacterial trait or not
78 SNPs	All GWAS results for the 78 SNPs remaining after filtering
ROOMIE1 results	All GWAS results for the 2 SNPs in ROOMIE1 after filtering
NLRs	NLR-annotator output on lotus genome
Windows	Various windowed metrics calculated on lotus genome, including k-means clustering of SNPs and HAPk heuristic
Candidate genes	Candidate genes of 78 SNPs from GWAS
SynCom	SynCom metadata
Syncom OTUs LORE1	Raw counts from syncom experiment with LORE1 mutants
Syncom OTUs LORE1 metadata	Metadata from aforementioned experiment
OTUs Utobara LORE1	OTU raw counts from Utobara LORE1 experiments
OTU families Utobara LORE1	OTU families raw counts from aforementioned experiment
OTUs Utobara LORE1 metadata	Metadata from aforementioned experiment
OTUs Utobara haplotype	OTU raw counts from Utobara natural accession experiments
OTUs Utobara haplotype metadata	Metadata from aforementioned experiment

## Sheet: Accession data
Name	Population	Altitude	Latitude	Longitude	Mean_temp	Min_temp	Beijerinckiaceae_1	Beijerinckiaceae_2	Beijerinckiaceae_3	Beijerinckiaceae_ave	Burkholderiaceae_1	Burkholderiaceae_2	Burkholderiaceae_3	Burkholderiaceae_ave	Caulobacteraceae_1	Caulobacteraceae_2	Caulobacteraceae_3	Caulobacteraceae_ave	Devosiaceae_1	Devosiaceae_2	Devosiaceae_3	Devosiaceae_ave	Enterobacteriaceae_2	Enterobacteriaceae_3	Enterobacteriaceae_ave	Microbacteriaceae_2	Micrococcaceae_1	Micrococcaceae_2	Micrococcaceae_3	Micrococcaceae_ave	Flavobacteriaceae_1	Flavobacteriaceae_2	Flavobacteriaceae_3	Flavobacteriaceae_ave	Mycobacteriaceae_3	Pseudomonadaceae_1	Pseudomonadaceae_2	Pseudomonadaceae_3	Pseudomonadaceae_ave	Rhizobiaceae_1	Rhizobiaceae_2	Rhizobiaceae_3	Rhizobiaceae_ave	Rhodanobacteraceae_2	Rhodanobacteraceae_3	Rhodanobacteraceae_ave	Sphingobacteriaceae_2	Sphingobacteriaceae_3	Sphingobacteriaceae_ave
Gifu	North	656	35.7167	137.267	11.2	-5.5	0.376952	0.753904	0.188476	0.439777	38.9068	42.7302	58.0775	46.5715	5.27733	4.44265	3.17717	4.29905	0.484653	0.457728	0.376952	0.439777	1.02316	0.161551	0.448752	0.0269251	0.726979	0.915455	0.296177	0.646204	11.3624	7.45827	10.0969	9.6392	0.0807754	29.3215	27.356	15.7512	24.1429	6.13893	9.80075	5.84276	7.26081	0.323102	1.34626	0.574403	0.376952	0.0807754	0.260276
MG001	South	2	32.7203	133.018	17.8	4.7	0.457728	1.10393	0.726979	0.762879	26.0905	26.3866	38.3683	30.2818	5.84276	8.61605	5.97738	6.81206	0.403877	0.0807754	0.592353	0.359002	0.107701	0.915455	0.341052	0.0807754	0.323102	0.592353	0.780829	0.565428	4.03877	16.9359	9.26225	10.079	0	49.0576	29.3753	28.1368	35.5232	8.80452	8.80452	9.4238	9.01095	0.0538503	0.161551	0.0807754	0.673129	0.511578	0.394902
MG002	South	NA	42.5719	143.503	NA	NA	0.161551	0.780829	0.673129	0.538503	42.4879	31.7178	39.2838	37.8298	5.08885	6.54281	5.00808	5.54658	0.134626	0.350027	0.430802	0.305152	0.188476	1.31933	0.502603	0.0538503	0.565428	0.484653	0.753904	0.601328	3.58104	13.8395	10.6085	9.34303	0.0538503	35.5412	29.6715	25.7135	30.3087	8.3468	8.8853	11.3355	9.52253	0.188476	0.0538503	0.107701	0.673129	0.296177	0.332077
MG003	South	44	35.3983	139.516	15.2	0	0.403877	1.02316	0.376952	0.601328	43.3495	35.7297	40.8454	39.9749	3.93107	7.86214	5.19655	5.66326	0.296177	0.0807754	0.673129	0.350027	0.511578	0.861605	0.457728	0.403877	0.242326	2.10016	0.915455	1.08598	3.55412	9.23533	7.40442	6.73129	0.107701	33.818	24.6096	27.4637	28.6304	8.2391	9.1007	10.5816	9.30713	0.376952	0.107701	0.197451	0.700054	0.403877	0.367977
MG004	South	3	31.4361	130.314	17.9	4	0.269251	0.83468	0.915455	0.673129	49.2999	34.0872	42.8918	42.093	4.0657	5.51966	5.68121	5.08885	0.242326	0.350027	0.376952	0.323102	0.161551	0.619278	0.260276	0.134626	0.780829	0.673129	0.83468	0.762879	1.99246	10.0969	7.08131	6.39024	0.0538503	33.8449	29.86	25.2827	29.6625	5.11578	11.6586	10.5816	9.11865	0.269251	0.0807754	0.161551	0.457728	0.511578	0.359002
MG005	North	22	35.3022	139.267	15.4	0.1	0.0807754	0.780829	0.88853	0.583378	40.9262	22.9672	40.7916	34.895	3.01562	6.86591	5.11578	4.9991	0.323102	0.0807754	0.646204	0.350027	0.0538503	0.538503	0.305152	0.0807754	0.592353	0.88853	1.05008	0.843655	2.80022	17.4744	7.18901	9.15455	0.161551	39.0953	36.2951	26.7367	34.0424	6.40819	7.86214	10.9585	8.40962	0.0538503	0.134626	0.134626	0.376952	0.673129	0.520553
MG006	NA	NA	NA	NA	NA	NA	0.296177	1.02316	0.646204	0.655179	33.6026	26.2789	37.1567	32.3461	4.7119	9.3161	5.60043	6.54281	0.296177	0.0269251	0.700054	0.341052	0.215401	1.58858	0.646204	0.161551	1.02316	0.780829	0.592353	0.798779	12.1971	13.0856	13.1125	12.7984	0.0269251	32.9564	30.3985	23.6672	29.0074	6.48896	8.58912	10.1777	8.4186	0.0538503	0.0807754	0.161551	0.646204	0.538503	0.466703
MG007	North	416	39.3156	141.338	8.7	-7.4	0.592353	0.457728	1.05008	0.700054	35.6489	21.8363	39.9569	32.4807	7.83522	7.61982	5.11578	6.85694	0.430802	0.0269251	0.538503	0.332077	0.107701	0.753904	0.359002	0.107701	0.700054	0.403877	0.484653	0.529528	6.73129	13.8665	6.13893	8.91222	0	30.1831	40.63	22.4556	31.0896	8.64297	8.18525	18.0937	11.6406	0.107701	0.323102	0.251301	0.0807754	0.215401	0.116676
MG008	South	97	35.0183	135.558	15.2	0.3	0.403877	0.646204	0.861605	0.637229	36.1335	22.671	36.7528	31.8525	6.43511	7.88907	4.09262	6.13893	0.134626	0.161551	0.350027	0.215401	0.107701	0.753904	0.287202	0.161551	0.403877	0.592353	0.457728	0.484653	10.3662	13.9742	6.21971	10.1867	0.0807754	30.1292	41.0339	24.8519	32.005	10.9585	6.81206	21.594	13.1215	0.0269251	0	0.107701	0.161551	0.215401	0.134626
MG009	North	332	39.9267	139.744	9.5	-5	0.538503	0.969305	0.673129	0.726979	32.391	22.0248	40.7647	31.7268	7.16209	8.85837	6.11201	7.37749	0.296177	0.134626	0.646204	0.359002	0.0269251	0.807754	0.287202	0.134626	0.511578	0.484653	0.753904	0.583378	5.76198	14.6742	8.61605	9.68408	0.0807754	37.0759	38.503	24.3403	33.3064	9.88153	6.89284	11.1201	9.29815	0	0.0269251	0.0628253	0.296177	0.753904	0.376952
MG010	North	368	39.3244	141.485	9	-6.9	0.538503	0.646204	0.457728	0.547478	33.9257	24.6365	39.0415	32.5346	9.55843	8.6699	5.54658	7.92497	0.323102	0.134626	0.83468	0.430802	0	1.15778	0.403877	0.0807754	0.511578	0.565428	0.915455	0.664154	12.8433	14.2434	9.88153	12.3227	0.161551	24.7711	35.9989	24.9058	28.5586	10.5277	8.61605	10.797	9.98025	0.188476	0.215401	0.161551	0.296177	0.296177	0.350027
MG011	North	499	39.3272	140.809	8.4	-8	0.511578	0.565428	0.619278	0.565428	30.8831	25.7135	40.6839	32.4269	7.61982	8.93915	5.46581	7.34159	0.242326	0.107701	0.457728	0.269251	0.269251	1.05008	0.457728	0.134626	0.807754	0.296177	0.861605	0.655179	5.51966	17.2321	9.18148	10.6444	0.107701	39.58	31.287	26.252	32.373	7.94292	7.80829	9.66613	8.47245	0.350027	0.107701	0.161551	0.376952	0.269251	0.233351
MG012	North	86	35.2569	139.597	15.5	1.2	0.350027	0.780829	0.619278	0.583378	31.9063	20.0862	41.2493	31.0806	6.03123	6.35433	6.35433	6.24663	0.107701	0.242326	0.538503	0.296177	0.134626	1.21163	0.457728	0.161551	0.861605	0.673129	0.673129	0.735954	3.8503	17.4206	7.96984	9.7469	0.0538503	41.4647	37.0759	25.2827	34.6078	10.1508	9.90845	10.2854	10.1149	0.215401	0.107701	0.170526	0.242326	0.565428	0.287202
MG013	North	-1	35.21	139.606	15.9	1.9	0.592353	0.484653	0.619278	0.565428	34.7065	27.1944	42.9456	34.9488	5.86968	5.76198	5.70813	5.77993	0.242326	0.0538503	0.619278	0.305152	0.376952	0.619278	0.341052	0.107701	0.646204	0.673129	0.673129	0.664154	5.00808	19.44	7.21594	10.5547	0.0269251	38.5837	29.3484	25.9558	31.296	7.21594	8.10447	9.66613	8.32885	0.161551	0.161551	0.134626	0.83468	0.538503	0.466703
MG014	North	-1	35.21	139.606	15.9	1.9	0.350027	0.619278	0.99623	0.655179	38.7453	28.056	40.7377	35.8463	3.76952	5.92353	5.70813	5.13373	0.215401	0.107701	0.753904	0.359002	0.242326	0.726979	0.332077	0.215401	0.592353	0.538503	1.07701	0.735954	4.33495	14.9704	7.35057	8.8853	0.0807754	38.9338	32.2294	24.1788	31.7806	6.97361	8.8853	11.497	9.11865	0.296177	0.296177	0.233351	1.05008	0.83468	0.628253
MG015	NA	NA	NA	NA	NA	NA	0.323102	0.430802	0.726979	0.493628	34.7334	24.7442	43.2149	34.2308	6.70436	8.72375	5.19655	6.87489	0.323102	0.107701	0.457728	0.296177	0.107701	0.807754	0.314127	0.107701	0.484653	1.56166	0.753904	0.933405	7.72752	19.6554	8.2391	11.874	0.0538503	32.391	30.3716	23.9095	28.8907	8.3468	8.26602	10.2585	8.9571	0.296177	0.188476	0.287202	0.538503	0.565428	0.367977
MG016	North	5	35.1353	139.676	15.8	1.5	0.538503	0.861605	0.673129	0.691079	32.8756	27.2482	41.9494	34.0244	5.27733	7.67367	5.57351	6.17483	0.538503	0.107701	0.592353	0.412852	0.0807754	0.565428	0.260276	0.161551	1.80398	0.99623	0.88853	1.22958	3.79645	16.1282	8.10447	9.34303	0.134626	39.6338	31.3678	25.2827	32.0948	9.15455	9.34303	10.3662	9.62125	0.161551	0.161551	0.179501	0.430802	0.484653	0.314127
MG017	NA	185	NA	NA	14.9	-0.1	NA	NA	NA	NA	NA	NA	NA	NA	NA	NA	NA	NA	NA	NA	NA	NA	NA	NA	NA	NA	NA	NA	NA	NA	NA	NA	NA	NA	NA	NA	NA	NA	NA	NA	NA	NA	NA	NA	NA	NA	NA	NA	NA
MG018	North	185	35.1331	138.959	14.9	-0.1	0.565428	0.780829	1.10393	0.816729	41.1416	26.9251	41.3032	36.4567	4.33495	6.78514	4.76575	5.29528	0.161551	0.0807754	0.83468	0.359002	0.0538503	1.34626	0.475678	0.0538503	0.780829	0.673129	0.700054	0.718004	6.24663	13.8395	9.50458	9.86358	0.134626	33.2526	36.1605	23.5864	30.9998	7.91599	8.53527	10.3931	8.94812	0.134626	0.107701	0.116676	0.242326	0.430802	0.224376
MG019	North	185	35.1331	138.959	14.9	-0.1	0.538503	0.673129	0.726979	0.646204	33.6564	22.7518	42.9995	33.1359	4.7119	5.73506	5.3581	5.26835	0.376952	0.215401	0.565428	0.385927	0.0269251	0.538503	0.206426	0.134626	1.37318	1.31933	0.861605	1.18471	4.11955	8.58912	5.84276	6.18381	0.0269251	39.6877	43.7534	25.3366	36.2592	8.07754	11.0932	11.1739	10.1149	0.0538503	0.269251	0.143601	0.242326	0.538503	0.287202
MG020	South	4	24.7201	125.467	23.8	15.7	0.403877	0.83468	0.565428	0.601328	37.8568	17.636	36.6721	30.7216	3.68875	3.06947	4.9273	3.89517	0.215401	0	0.350027	0.188476	0.0538503	2.15401	0.762879	0.0807754	0.619278	0.807754	0.969305	0.798779	3.71567	3.68875	8.13139	5.1786	0.134626	36.1605	60.1777	28.5676	41.6353	9.90845	9.50458	10.6354	10.0162	0.0538503	0.376952	0.197451	0.161551	0.565428	0.269251
MG021	North	308	41.4606	140.093	8.5	-5.9	0.83468	0.915455	0.780829	0.843655	41.6263	23.1287	41.734	35.4963	4.22725	4.46957	5.41195	4.70293	0.511578	0.107701	0.619278	0.412852	0.134626	1.05008	0.403877	0	0.538503	1.88476	0.619278	1.01418	3.8503	5.81583	6.38126	5.34913	0.0807754	29.1599	47.9268	25.8481	34.3116	13.2202	10.5277	10.7162	11.4881	0.107701	0.242326	0.179501	0.134626	0.700054	0.296177
MG022	South	46	31.1917	130.562	18.3	4.9	0.457728	0.673129	0.565428	0.565428	40.3339	18.4168	41.0339	33.2615	3.58104	4.25417	4.52342	4.11955	0.161551	0.0269251	0.376952	0.188476	0.0807754	1.21163	0.430802	0.134626	0.726979	0.565428	0.780829	0.691079	3.76952	6.86591	8.31987	6.31843	0.0807754	35.4604	48.0614	25.6058	36.3759	9.9623	14.9165	10.2585	11.7124	0.403877	0.376952	0.269251	0.188476	0.538503	0.251301
MG023	North	4	40.8236	140.762	10.1	-5	0.646204	0.807754	0.726979	0.726979	44.6419	23.4787	42.4879	36.8695	5.19655	4.44265	5.19655	4.94525	0.565428	0	0.403877	0.323102	0	0.780829	0.403877	0.0269251	0.726979	0.538503	0.915455	0.726979	2.23479	6.48896	8.75067	5.82481	0.107701	30.7754	48.1422	23.2364	34.0513	9.34303	10.2316	10.6085	10.061	0.0807754	0.457728	0.287202	0.134626	0.430802	0.224376
MG024	South	4	24.7193	125.469	23.8	15.7	0.700054	0.673129	0.700054	0.691079	40.9532	24.3673	38.503	34.6078	5.60043	4.52342	5.08885	5.0709	0.296177	0.0538503	0.538503	0.296177	0.0269251	1.85784	0.673129	0.134626	1.07701	0.807754	0.915455	0.933405	4.03877	8.5622	10.5008	7.70059	0.0807754	27.706	37.9375	24.9058	30.1831	12.0894	17.5013	10.8508	13.4805	0.269251	0.538503	0.323102	0.134626	0.350027	0.215401
MG025	South	62	30.3289	130.65	19	8.1	0.700054	0.646204	0.88853	0.744929	40.0646	22.1325	43.3226	35.1732	4.87345	4.41572	4.65805	4.64908	0.430802	0.242326	0.403877	0.359002	0.296177	1.45396	0.601328	0.269251	1.07701	1.34626	0.969305	1.13086	3.93107	6.81206	9.15455	6.63256	0.0269251	33.0372	46.1228	22.9672	34.0424	9.88153	11.8471	10.8508	10.8598	0.0807754	0.376952	0.170526	0.646204	0.403877	0.439777
MG026	North	17	35.6964	139.758	15.6	0.8	0.619278	1.26548	0.646204	0.843655	41.4378	21.1632	42.434	35.0117	4.57728	4.9273	4.57728	4.69395	0.323102	0.0538503	0.565428	0.314127	0.0269251	0.807754	0.350027	0.0807754	0.969305	1.13086	0.83468	0.97828	2.23479	5.86968	7.48519	5.19655	0.161551	31.2062	48.4383	25.3366	34.9937	10.7701	11.0662	10.6624	10.8329	0.0807754	0.350027	0.206426	0.538503	0.511578	0.385927
MG027	South	77	26.4019	127.736	22.2	12.8	0.807754	0.83468	0.780829	0.807754	38.4222	21.4863	41.2763	33.7282	3.90415	4.41572	5.97738	4.76575	0.0269251	0.0807754	0.457728	0.188476	0.107701	0.565428	0.314127	0.430802	16.2089	0.915455	0.861605	5.99533	1.26548	5.95046	9.01992	5.41195	0.161551	19.9515	49.5153	23.7749	31.0806	6.00431	10.1239	10.7431	8.9571	0.107701	0.323102	0.188476	0.161551	0.726979	0.314127
MG028	NA	0	NA	NA	18.6	5.3	0.753904	1.02316	0.83468	0.87058	41.6801	19.4938	42.0302	34.4014	5.78891	3.7426	5.035	4.8555	0.457728	0.107701	0.592353	0.385927	0.188476	1.21163	0.502603	0.134626	1.07701	0.88853	1.07701	1.01418	3.68875	5.60043	8.93915	6.07611	0.107701	27.6791	50.377	23.4249	33.827	10.9585	12.224	10.1777	11.1201	0.430802	0.188476	0.233351	0.269251	0.700054	0.430802
MG029	NA	NA	NA	NA	NA	NA	0.99623	0.861605	0.673129	0.843655	39.2569	20.6516	40.7108	33.5398	4.20032	6.35433	5.51966	5.3581	0.430802	0.161551	0.726979	0.439777	0.215401	0.88853	0.691079	0.242326	1.56166	0.88853	0.99623	1.14881	2.90792	4.55035	9.66613	5.70813	0.0538503	27.706	48.2499	24.1788	33.3782	12.951	11.3893	10.7701	11.7035	0.350027	0.107701	0.466703	0.161551	0.619278	0.323102
MG030	North	85	42.8475	143.173	6.4	-14.3	0.619278	1.15778	0.565428	0.780829	43.6726	19.2784	40.6031	34.518	4.2811	4.84653	5.035	4.72088	0.296177	0.161551	0.511578	0.323102	0.511578	1.37318	0.655179	0.215401	1.21163	0.646204	0.592353	0.816729	5.97738	9.26225	10.3393	8.5263	0.0269251	29.6715	45.9074	23.3441	32.9743	8.80452	12.6279	11.524	10.9855	0.484653	0.376952	0.394902	0.161551	0.323102	0.170526
MG032	North	18	42.5464	143.477	5.9	-13.2	0.88853	1.05008	0.726979	0.88853	47.3344	22.1863	42.3263	37.2824	4.0657	4.4965	4.6042	4.3888	0.430802	0.0807754	0.592353	0.367977	1.13086	0.592353	0.655179	0.296177	0.83468	0.565428	0.780829	0.726979	2.53096	6.16586	4.46957	4.3888	0.0807754	27.356	40.657	26.2789	31.4306	10.9316	13.3279	10.0431	11.4342	0.134626	0.94238	0.421827	0.161551	0.107701	0.107701
MG033	North	NA	42.5464	143.477	NA	NA	1.21163	0.99623	0.538503	0.915455	37.399	24.1788	43.3764	34.9847	5.08885	5.65428	5.19655	5.31323	0.296177	0.0269251	0.646204	0.323102	0.296177	0.673129	0.350027	0.403877	1.93861	0.88853	0.753904	1.19368	1.80398	5.1427	6.83899	4.59523	0.161551	32.5256	37.4529	25.0673	31.6819	13.4626	13.8934	9.47765	12.2779	0.269251	1.23856	0.565428	0.269251	0.726979	0.332077
MG034	North	29	42.6142	143.548	5.7	-13.9	0.861605	0.915455	0.538503	0.771854	42.7302	21.0016	36.9144	33.5487	7.08131	4.7119	6.08508	5.95943	0.457728	0.269251	0.376952	0.367977	0.161551	1.61551	0.601328	0.242326	0.94238	1.23856	0.538503	0.90648	4.87345	12.0086	10.4739	9.11865	0.107701	23.9095	41.734	26.9521	30.8652	10.5008	10.447	9.04685	9.9982	0.134626	0.161551	0.188476	0.323102	0.457728	0.287202
MG035	North	59	42.4456	141.161	7.8	-7.4	0.726979	0.780829	0.753904	0.753904	38.1799	25.3096	40.0377	34.5091	5.1427	4.3888	5.49273	5.00808	0.484653	0.0269251	0.538503	0.350027	0.215401	1.02316	0.421827	0.215401	0.700054	0.700054	0.565428	0.655179	3.66182	8.69682	8.75067	7.03644	0.134626	31.2601	41.6801	25.3366	32.7589	12.224	13.0587	11.0393	12.1073	0.107701	0.242326	0.179501	0.0269251	0.646204	0.233351
MG036	North	4	42.4094	140.306	8.2	-6.7	0.99623	1.10393	0.99623	1.03213	51.077	23.8557	41.6263	38.853	3.90415	4.14647	6.13893	4.72985	0.269251	0.161551	0.511578	0.314127	0.242326	0.780829	0.367977	0.242326	2.18094	0.726979	0.861605	1.25651	1.64243	7.10824	7.05439	5.26835	0.161551	21.594	34.5719	24.8788	27.0149	9.07377	8.80452	10.8239	9.5674	0.296177	0.215401	0.206426	0.726979	0.350027	0.367977
MG038	North	22	42.1081	140.572	8.5	-6.6	0.83468	0.753904	0.99623	0.861605	47.6844	15.7512	39.4992	34.3116	4.52342	3.63489	5.00808	4.3888	0.376952	0.0269251	0.861605	0.421827	0.242326	0.538503	0.260276	0.107701	1.15778	0.83468	0.83468	0.94238	1.77706	5.16963	7.37749	4.77473	0.134626	26.7905	56.6774	25.3096	36.2592	8.3468	10.7162	12.1971	10.42	0.188476	0.107701	0.143601	0.161551	0.861605	0.350027
MG039	North	718	40.9299	141.019	6.6	-9.5	1.02316	1.40011	1.07701	1.16676	44.9381	27.6791	41.0339	37.8837	5.06193	6.13893	4.84653	5.34913	0.296177	0.188476	0.619278	0.367977	0.107701	0.619278	0.251301	0.269251	1.23856	1.21163	1.29241	1.24753	4.52342	10.3931	6.65051	7.18901	0.188476	25.8751	29.1869	25.525	26.8623	8.29295	15.7781	12.1432	12.0714	0.134626	0.323102	0.179501	0.161551	0.269251	0.188476
MG040	North	27	40.5869	141.249	10.1	-5.1	0.753904	0.700054	1.07701	0.843655	39.7146	30.2908	40.6839	36.8964	4.95423	4.98115	5.1427	5.02603	0.350027	0.0538503	0.457728	0.287202	0.0807754	0.673129	0.287202	0.323102	1.34626	1.85784	0.88853	1.36421	5.08885	15.3473	5.30425	8.58015	0.161551	26.8174	25.7674	26.1982	26.261	10.0431	15.9397	13.4356	13.1395	0.215401	0.403877	0.215401	0	0.538503	0.197451
MG041	North	49	39.7556	140.162	10.9	-4.1	0.753904	0.94238	0.94238	0.879555	39.0415	27.8406	41.8686	36.2502	4.84653	5.81583	5.92353	5.52863	0.403877	0.0807754	0.619278	0.367977	0.0538503	0.646204	0.278227	0.296177	0.673129	1.13086	0.646204	0.816729	5.49273	10.1239	7.37749	7.66469	0.0269251	27.5444	33.6026	25.175	28.774	9.04685	13.7318	11.2816	11.3534	0.188476	0.269251	0.179501	0.242326	0.457728	0.242326
MG042	North	296	39.7453	140.708	9.4	-6.9	0.83468	0.94238	0.403877	0.726979	37.2106	25.2289	40.4685	34.3026	3.66182	5.19655	4.63113	4.4965	0.430802	0.0807754	0.430802	0.314127	0	0.242326	0.125651	0.350027	0.969305	1.53473	0.511578	1.00521	5.60043	9.2084	12.9779	9.26225	0.0269251	27.9214	32.391	22.9133	27.7419	12.0355	17.9052	11.6855	13.8754	0.215401	0.430802	0.224376	0.134626	0.161551	0.197451
MG044	North	8	38.3867	141.388	11.9	-2.8	0.780829	1.02316	0.861605	0.88853	38.1529	27.0867	40.8454	35.3617	6.16586	5.51966	5.49273	5.72608	0.296177	0.107701	0.780829	0.394902	0.0807754	0.296177	0.143601	0.107701	0.430802	1.26548	1.18471	0.96033	7.05439	8.40065	9.3161	8.25705	0.107701	28.1906	34.3834	25.6058	29.3933	7.64674	14.9165	9.61228	10.7252	0.511578	0.242326	0.260276	0.215401	0.430802	0.224376
MG045	North	179	37.5886	139.915	11.9	-4	1.15778	1.07701	0.484653	0.90648	35.1912	21.3516	40.5493	32.364	5.76198	5.84276	4.95423	5.51966	0.323102	0.215401	0.619278	0.385927	0.188476	0.484653	0.233351	0.323102	0.646204	0.99623	0.807754	0.816729	4.73883	12.8164	10.9855	9.51355	0.0538503	23.1556	32.8487	23.1018	26.3687	10.9585	16.8821	11.4163	13.0856	0.350027	0.296177	0.224376	0.188476	0.296177	0.215401
MG046	North	179	37.5875	139.914	11.9	-4	0.94238	1.66936	0.83468	1.14881	32.7948	29.2676	42.1109	34.7245	4.52342	4.76575	5.38503	4.8914	0.215401	0.269251	0.88853	0.457728	0.619278	0.565428	0.421827	0.350027	0.673129	1.61551	0.99623	1.09496	4.76575	5.76198	5.57351	5.36708	0.0269251	36.5105	29.0792	26.7905	30.7934	9.01992	17.1244	10.5547	12.233	0.99623	0.269251	0.484653	0.0807754	0.565428	0.269251
MG048	NA	NA	NA	NA	NA	NA	0.753904	0.88853	0.592353	0.744929	46.2843	23.4249	41.9494	37.2195	5.2504	6.78514	4.9273	5.65428	0.403877	0.350027	0.457728	0.403877	0.161551	0.484653	0.215401	0.134626	0.350027	0.511578	0.619278	0.493628	4.09262	15.0781	8.07754	9.08275	0.0538503	29.7254	35.595	26.629	30.6498	7.35057	8.42757	9.58535	8.4545	0.161551	0.350027	0.206426	0.403877	0.484653	0.314127
MG049	South	4	35.6367	134.619	14.5	-0.1	1.07701	0.376952	0.511578	0.655179	34.5988	23.2903	37.3721	31.7537	5.62736	7.00054	5.51966	6.04918	0.323102	0.0807754	0.565428	0.323102	0.161551	0.161551	0.87058	0.242326	1.05008	0.726979	0.619278	0.798779	6.94669	16.0474	13.0587	12.0176	0.0538503	33.441	38.1799	25.525	32.382	6.40819	8.75067	9.58535	8.24807	0.188476	0.350027	0.233351	0.323102	0.188476	0.179501
MG050	South	4	35.5017	133.732	14.5	0	1.05008	1.31933	0.673129	1.01418	45.9882	30.0754	37.9645	38.0093	5.19655	5.30425	4.7119	5.0709	0.376952	0.350027	0.673129	0.466703	0.161551	0.269251	0.206426	0.242326	1.02316	1.61551	0.780829	1.13983	3.15024	6.59666	14.8627	8.2032	0.0538503	24.098	34.1411	23.8288	27.356	9.8546	13.0856	9.23533	10.7252	1.07701	0.592353	0.574403	0	0.134626	0.0897505
MG051	North	2	35.5033	133.854	14.6	0	0.700054	1.21163	0.861605	0.92443	38.0452	30.9101	40.8454	36.6003	6.51589	4.73883	5.76198	5.67223	0.403877	0.296177	0.565428	0.421827	0.0807754	0.484653	0.376952	0.107701	0.619278	1.18471	0.969305	0.92443	10.6354	6.05816	9.36995	8.68785	0.0538503	28.4599	32.6333	23.9365	28.3432	5.22348	15.2396	10.0162	10.1598	0.538503	0.484653	0.341052	0.242326	0.107701	0.421827
MG052	South	5	35.3872	132.789	14.7	0.7	0.242326	0.350027	0.969305	0.520553	35.4873	23.8557	37.1567	32.1666	5.68121	7.40442	5.68121	6.25561	0.269251	0.0269251	0.700054	0.332077	0.215401	0.323102	0.314127	0.161551	1.40011	0.538503	0.726979	0.88853	5.51966	13.1933	10.2316	9.64818	0.107701	35.2181	38.2068	26.1443	33.1897	5.92353	8.02369	11.2009	8.3827	0.565428	0.269251	0.287202	0.592353	0.161551	0.556453
MG053	South	13	34.6508	131.826	15	1.4	0.753904	0.350027	0.88853	0.664154	37.049	24.6096	40.7916	34.1501	4.6042	6.65051	5.54658	5.60043	0.323102	0.0807754	0.700054	0.367977	0.134626	0.269251	0.179501	0.242326	0.484653	0.646204	1.07701	0.735954	5.76198	13.2202	9.07377	9.352	0.107701	33.091	38.3953	23.0749	31.5204	10.6354	9.28918	11.3355	10.42	0.0807754	0.484653	0.188476	0.269251	0.161551	0.314127
MG055	NA	NA	NA	NA	NA	NA	1.02316	0.565428	1.13086	0.90648	43.6995	22.8056	40.6839	35.7297	6.21971	5.06193	5.78891	5.69018	0.350027	0.107701	0.646204	0.367977	0.565428	0.403877	0.341052	0.107701	0.350027	0.726979	0.969305	0.682104	7.00054	7.51212	6.00431	6.83899	0.0807754	23.9365	47.6575	25.4173	32.3371	8.40065	8.91222	12.4933	9.93538	0.350027	0.403877	0.260276	0.161551	0.403877	0.484653
MG056	South	1	31.5808	131.416	17.8	3	1.23856	0.83468	0.88853	0.987255	35.9989	30.1023	41.4917	35.8643	6.78514	4.63113	5.49273	5.63633	0.592353	0.565428	0.673129	0.610303	0.0269251	0.565428	0.233351	0.565428	0.700054	0.83468	1.34626	0.96033	6.30048	5.41195	6.38126	6.03123	0	27.4098	33.4141	25.175	28.6663	10.42	15.5897	11.147	12.3856	1.96554	0.242326	0.744929	0.0807754	0.457728	0.278227
MG057	South	0	31.7002	131.459	17.7	2.7	0.99623	1.02316	0.94238	0.987255	35.9181	28.2983	42.4879	35.5681	7.02746	4.11955	5.33118	5.49273	0.134626	0.323102	0.726979	0.394902	0.242326	0.376952	0.260276	0.457728	1.05008	1.50781	0.969305	1.17573	4.11955	6.19278	5.035	5.11578	0.0269251	28.9176	32.5525	24.3673	28.6125	9.47765	16.7474	13.0587	13.0946	2.04631	0.350027	0.798779	0.107701	0.457728	0.260276
MG058	South	NA	31.6997	131.482	NA	NA	0.619278	0.538503	0.94238	0.700054	33.6834	20.0862	41.6801	31.8165	7.29672	5.57351	5.22348	6.03123	0.350027	0.161551	0.673129	0.394902	0.0807754	0.592353	0.269251	0.107701	0.350027	0.350027	1.45396	0.718004	10.9316	7.70059	6.21971	8.28397	0.0807754	26.7367	51.6424	25.3635	34.5809	9.45073	6.91976	11.4432	9.27123	0.403877	0.376952	0.260276	0.323102	0.403877	0.538503
MG059	South	NA	31.6997	131.482	NA	NA	1.13086	0.619278	0.83468	0.861605	37.399	19.0361	47.0921	34.5091	6.54281	7.56597	4.14647	6.08508	0.484653	0.134626	0.296177	0.305152	0.107701	0.83468	0.314127	0.0538503	0.511578	0.269251	0.538503	0.439777	4.30802	17.8783	7.86214	10.0162	0.0538503	27.9214	41.5724	23.5595	31.0178	10.1777	4.98115	7.64674	7.60187	0.0269251	0.99623	0.341052	0.592353	0.107701	0.332077
MG060	South	-3	31.2539	130.293	18.1	4.8	0.592353	1.10393	0.807754	0.83468	40.6839	28.6753	46.419	38.5927	3.44642	5.30425	3.8503	4.20032	0.592353	0.161551	0.565428	0.439777	0.0807754	0.403877	0.332077	0	1.58858	0.457728	0.861605	0.969305	3.39257	10.2854	6.73129	6.80309	0.0538503	29.1061	33.3603	26.5482	29.6715	7.80829	13.7857	7.88907	9.82768	0.215401	0.107701	0.125651	0.0807754	0.296177	0.83468
MG061	South	6	31.3744	130.988	17.8	3.4	0.457728	1.26548	1.10393	0.94238	16.1551	27.0059	41.007	28.056	3.31179	5.2504	5.62736	4.72985	0.296177	0.134626	0.969305	0.466703	0.215401	0.619278	0.332077	0	0.565428	0.592353	0.646204	0.601328	5.38503	8.37372	10.3931	8.05062	0.0807754	53.3387	34.8411	23.371	37.1836	7.88907	13.4087	9.36995	10.2226	0.161551	0.242326	0.556453	0.457728	0.161551	0.601328
MG062	South	NA	NA	NA	NA	NA	0.0538503	0.323102	0.726979	0.367977	37.7491	30.8293	36.8875	35.1553	2.45019	5.78891	5.3581	4.5324	0.242326	0	1.05008	0.430802	0.188476	0.861605	0.367977	0.188476	0.457728	0.403877	0.861605	0.574403	3.23102	15.9397	14.1896	11.1201	0.107701	35.2989	35.4335	25.0673	31.9332	8.2391	5.57351	6.73129	6.84796	0.376952	0.215401	0.224376	0.511578	0.134626	0.269251
MG063	South	2	31.7397	131.471	17.7	2.6	0.242326	0.296177	1.23856	0.592353	34.518	29.7792	42.7302	35.6758	3.63489	3.7426	5.70813	4.36187	0.269251	0.107701	1.07701	0.484653	0.376952	0.296177	0.242326	0.0538503	1.40011	0.376952	0.99623	0.92443	2.10016	25.6058	7.10824	11.6047	0.107701	38.503	30.2908	22.9941	30.5959	6.94669	4.30802	9.34303	6.86591	0.376952	0.296177	0.233351	0.538503	0.242326	0.260276
MG064	South	NA	31.8294	131.415	NA	NA	0.376952	0.726979	0.969305	0.691079	33.4949	21.4324	35.622	30.1831	3.31179	7.48519	5.54658	5.44785	0.188476	0.0269251	0.88853	0.367977	0.0269251	0.99623	0.367977	0.0538503	1.18471	0.376952	0.83468	0.798779	5.33118	12.1432	12.9241	10.1328	0.188476	33.468	40.3339	23.1826	32.3281	10.0969	7.67367	9.71998	9.16353	0.215401	0.83468	0.412852	0.88853	0.107701	0.359002
MG065	South	30	31.8294	131.415	17.4	2.1	0.350027	0.269251	1.10393	0.574403	30.0754	30.1831	35.7835	32.014	4.33495	4.7119	4.3888	4.47855	0.242326	0.0538503	0.457728	0.251301	0.511578	0.538503	0.367977	0.134626	0.673129	0.753904	1.31933	0.915455	2.80022	8.02369	7.18901	6.00431	0.0807754	40.7647	44.3188	19.8438	34.9758	10.2585	6.16586	20.5708	12.3317	0.403877	2.15401	0.90648	0.403877	0.242326	0.269251
MG066	South	14	32.1317	131.409	17.2	1.5	0.376952	0.188476	1.15778	0.574403	29.9946	30.4254	40.4146	33.6116	5.3581	9.58535	6.94669	7.29672	0.376952	0.0538503	0.700054	0.376952	0.0807754	0.646204	0.475678	0.0538503	0.646204	0.269251	1.02316	0.646204	3.06947	17.7706	9.15455	9.9982	0.161551	39.0953	29.5638	22.9402	30.5331	7.80829	5.43888	7.53904	6.92874	0.350027	0.619278	0.341052	0.430802	0.107701	0.260276
MG067	South	133	30.7736	131.009	18.7	6.9	0.376952	0.484653	1.13086	0.664154	46.0959	29.0522	42.2186	39.1222	4.1734	6.62359	4.3888	5.06193	0.753904	0.0807754	0.511578	0.448752	0.0807754	0.484653	0.206426	0.0269251	0.99623	0.430802	0.753904	0.726979	4.2811	22.6171	7.00054	11.2996	0.161551	27.3021	30.8562	21.9171	26.6918	7.02746	4.6042	13.1395	8.25705	0.161551	1.34626	0.547478	0.323102	0.0538503	0.161551
MG068	South	61	30.2342	130.556	19.3	8.5	0.403877	0.511578	0.619278	0.511578	40.1454	23.8557	39.3376	34.4462	2.98869	7.91599	5.30425	5.40298	0.134626	0.0807754	0.484653	0.233351	0.0538503	2.80022	1.06803	0.0807754	0.484653	0.323102	0.592353	0.466703	6.11201	13.7588	14.755	11.5419	0.0269251	38.8261	39.1222	21.5401	33.1628	5.08885	8.42757	7.37749	6.96464	0.0269251	0.619278	0.287202	0.0807754	0.215401	0.341052
MG069	South	15	34.5872	135.507	15.3	1.2	0.403877	0.565428	0.88853	0.619278	45.1535	26.0366	47.0382	39.4094	5.27733	8.10447	5.1427	6.17483	0.430802	0.0269251	0.457728	0.305152	0.107701	1.26548	0.502603	0.0269251	1.15778	0.592353	1.05008	0.933405	2.98869	13.6241	8.42757	8.3468	0.0538503	30.2639	35.1912	21.2978	28.9176	6.89284	8.18525	8.26602	7.78137	0.0538503	0.242326	0.188476	0.350027	0.296177	0.242326
MG070	South	85	33.8742	135.228	16	2.3	0.592353	0.430802	1.15778	0.726979	43.2418	26.1712	40.8454	36.7528	5.49273	5.73506	6.11201	5.77993	0.457728	0.215401	0.861605	0.511578	0	1.29241	0.466703	0.134626	0.592353	0.592353	0.565428	0.583378	3.04254	10.8778	6.65051	6.85694	0.0538503	30.1292	36.9682	24.0172	30.3716	9.4238	12.5471	11.6317	11.2009	0.134626	0.538503	0.278227	0.457728	0.646204	0.367977
MG071	South	510	32.9458	131.099	13.1	-2.3	0.350027	0.296177	0.780829	0.475678	50.2154	20.4362	42.4879	37.7132	3.52719	5.43888	5.76198	4.90935	0.269251	0	0.565428	0.278227	0.0269251	0.726979	0.287202	0.0269251	1.23856	0.376952	0.673129	0.762879	2.61174	12.2509	8.37372	7.74547	0.0807754	27.4098	48.923	23.7211	33.3513	6.43511	6.51589	10.2316	7.72752	0.0269251	0.0807754	0.215401	0.161551	0.350027	0.242326
MG072	North	693	32.8517	131.053	12.2	-3	0.376952	0.484653	0.700054	0.520553	36.9682	26.1712	39.9031	34.3475	3.47334	8.02369	5.08885	5.52863	0.376952	0.242326	0.780829	0.466703	0.296177	1.23856	1.38216	0.0538503	1.40011	0.592353	0.99623	0.99623	3.39257	11.4163	13.7318	9.51355	0.0538503	34.2757	36.0797	22.4286	30.928	6.51589	8.93915	8.02369	7.82624	0.107701	0.457728	0.296177	0.323102	0.0807754	0.753904
MG073	South	687	33.0372	131.267	12.1	-3.1	0.511578	0.350027	0.780829	0.547478	30.6677	39.7684	40.5223	36.9862	3.7426	3.28487	5.30425	4.11057	0.403877	0.134626	0.457728	0.332077	0.403877	0.861605	0.457728	0.0269251	1.37318	0.861605	0.726979	0.987255	4.87345	3.98492	13.4895	7.44929	0.0538503	31.2332	41.3032	22.6171	31.7178	10.5008	5.60043	8.29295	8.13139	0.861605	0.269251	0.448752	0.242326	0.0807754	0.125651
MG074	South	259	33.3947	132.535	14.9	0.3	0.376952	0.376952	0.753904	0.502603	33.7641	24.2326	41.4378	33.1449	5.2504	6.30048	6.16586	5.90558	0.457728	0.107701	0.673129	0.412852	0.376952	0.565428	0.97828	0.269251	0.88853	0.915455	0.807754	0.87058	9.34303	12.0625	8.02369	9.80973	0.0269251	26.3059	36.1335	25.1212	29.1869	8.61605	11.3355	10.6354	10.1957	0.188476	0.107701	0.215401	0.403877	0.673129	0.376952
MG075	South	260	33.3386	132.544	14.9	0.4	0.376952	0.296177	0.83468	0.502603	32.7679	32.7141	42.7033	36.0617	4.9273	5.22348	5.86968	5.34015	0.403877	0.0807754	0.538503	0.341052	0.215401	0.646204	0.287202	0.0807754	1.18471	0.161551	0.969305	0.771854	4.98115	14.3242	5.65428	8.31987	0.107701	37.6144	32.7948	25.3366	31.9153	9.3161	8.3468	9.88153	9.18148	0.726979	1.21163	0.709029	0.457728	0.376952	0.296177
MG076	North	439	34.2633	131.591	12.6	-1.9	0.350027	0.592353	0.726979	0.556453	32.9025	34.545	43.6457	37.0311	4.44265	5.1427	4.84653	4.81063	0.430802	0.430802	0.592353	0.484653	0.592353	0.430802	0.502603	0.269251	0.969305	1.64243	0.430802	1.01418	3.90415	6.62359	15.2666	8.5981	0.215401	25.7404	29.6984	18.3899	24.6096	6.40819	11.8201	9.50458	9.2443	1.15778	0.700054	0.637229	0.323102	0.0269251	0.224376
MG077	North	0	35.1192	138.662	16	0.6	0.484653	1.02316	1.10393	0.87058	35.7835	30.8562	48.8961	38.5119	3.33872	6.78514	5.3581	5.16065	0.376952	0.0538503	0.619278	0.350027	0.134626	0.592353	0.269251	0.215401	4.03877	0.94238	0.94238	1.97451	4.46957	14.2973	13.8126	10.8598	0.107701	33.8449	32.4448	14.405	26.8982	8.31987	7.40442	7.70059	7.80829	0.403877	0.457728	0.323102	0.323102	0.0807754	0.215401
MG078	North	909	35.8958	136.723	9	-6.5	0.323102	0.376952	0.94238	0.547478	36.2951	31.1524	45.9882	37.8119	2.98869	5.43888	5.92353	4.7837	0.215401	0.0807754	0.780829	0.359002	0.565428	0.511578	0.376952	0.323102	3.01562	0.700054	0.646204	1.45396	4.2811	9.5315	9.50458	7.77239	0.0807754	27.9483	30.7485	20.0323	26.243	9.45073	9.61228	7.40442	8.82247	0.673129	1.13086	0.655179	0.619278	0.134626	0.430802
MG079	North	NA	36.2203	136.141	NA	NA	0.403877	0.700054	0.807754	0.637229	33.7103	30.8831	40.1723	34.9219	2.80022	5.51966	5.43888	4.58625	0.296177	0.242326	0.538503	0.359002	0.565428	0.457728	0.448752	0.242326	0.83468	0.861605	0.403877	0.700054	8.40065	7.10824	18.7399	11.4163	0.188476	22.1594	31.4755	16.9898	23.5416	7.05439	12.6817	8.21217	9.3161	1.07701	0.592353	0.610303	0.592353	0.161551	0.448752
MG080	North	20	36.6494	137.191	13.9	-0.7	0.700054	0.403877	0.619278	0.574403	40.2262	28.8638	39.0145	36.0348	5.70813	5.43888	5.2504	5.46581	0.457728	0.269251	0.700054	0.475678	0.269251	0.83468	0.565428	0.215401	0.807754	0.646204	0.94238	0.798779	5.41195	9.5315	13.7049	9.54945	0.0807754	25.7674	35.8643	22.8056	28.1458	11.147	9.36995	9.7469	10.088	0.753904	0.350027	0.421827	0.296177	0.242326	0.341052
MG081	North	7	37.0353	137.85	13.7	-1	0.403877	0.915455	0.700054	0.673129	36.9682	34.2488	39.8761	37.0311	3.79645	5.38503	4.84653	4.676	0.430802	0.134626	0.700054	0.421827	0.403877	0.700054	0.502603	0.188476	0.780829	0.807754	0.99623	0.861605	11.2009	6.30048	11.2278	9.57638	0.0538503	30.2908	31.637	24.3673	28.765	6.62359	11.3624	9.9623	9.3161	1.40011	0.269251	0.700054	0.403877	0.269251	0.592353
MG082	North	9	37.7606	139.209	13.1	-1.6	0.673129	0.88853	0.753904	0.771854	43.7264	34.0603	44.1303	40.639	4.95423	6.05816	5.16963	5.394	0.700054	0.323102	0.726979	0.583378	0.780829	0.646204	0.511578	0.242326	1.05008	0.780829	0.726979	0.85263	3.23102	6.48896	9.90845	6.54281	0.188476	28.8638	25.0135	19.3592	24.4121	7.51212	17.9321	11.4701	12.3048	1.77706	0.323102	0.735954	0.134626	0.242326	0.152576
MG083	North	1557	36.5439	138.363	5	-11.9	0.88853	1.13086	0.780829	0.933405	36.8336	31.637	39.9031	36.1246	5.41195	4.65805	5.49273	5.18758	0.619278	0.403877	0.323102	0.448752	0.861605	0.646204	0.547478	0.188476	0.969305	0.94238	0.538503	0.816729	4.8196	6.51589	11.2278	7.52109	0.188476	31.1524	28.8638	23.6134	27.8765	9.2084	12.574	10.2316	10.6713	1.15778	0.161551	0.457728	0.242326	0.430802	0.323102
MG084	North	158	37.6025	139.65	12.1	-3.7	1.13086	0.565428	0.807754	0.83468	37.5067	23.1018	38.5299	33.0461	5.16963	6.78514	5.60043	5.85173	0.484653	0.0807754	0.376952	0.314127	0.188476	0.592353	0.269251	0.188476	1.37318	0.780829	1.02316	1.05906	6.91976	19.9785	9.80075	12.233	0.107701	28.6484	32.9025	27.4098	29.6536	8.61605	10.7162	8.80452	9.37893	0.403877	0.700054	0.457728	0.134626	0.134626	0.116676
MG085	North	293	37.1539	140.414	11.7	-4.2	0.673129	0.161551	0.538503	0.457728	30.1831	35.0296	39.8761	35.0296	4.36187	4.46957	4.68498	4.50547	0.323102	0.0538503	0.753904	0.376952	0.350027	0.511578	0.296177	0	1.37318	0.403877	0.673129	0.816729	2.88099	17.2052	12.2779	10.788	0.0538503	41.1416	30.587	23.5326	31.7537	10.6085	8.15832	10.0431	9.6033	0.269251	0.350027	0.251301	0.134626	0.161551	0.125651
MG086	North	412	38.7608	140.76	9.2	-6.7	1.07701	0.538503	0.780829	0.798779	30.4254	30.7485	38.7453	33.3064	4.03877	8.96607	4.4965	5.83378	0.215401	0.0538503	0.538503	0.269251	0.134626	0.484653	0.278227	0.134626	1.15778	0.511578	0.99623	0.88853	5.00808	21.9171	15.3743	14.0998	0.296177	37.1567	23.2364	22.1863	27.5265	10.2854	9.39688	9.7469	9.80973	0.457728	0.376952	0.305152	0.188476	0.161551	0.269251
MG088	North	150	36.6519	139.977	13.1	-4.2	0.753904	0.457728	0.673129	0.628253	39.4992	27.4098	35.2181	34.0424	6.03123	5.43888	4.68498	5.38503	0.511578	0.0538503	0.861605	0.475678	2.66559	0.457728	1.20266	0.188476	1.07701	0.269251	1.50781	0.951355	5.41195	8.37372	12.1971	8.66092	0.107701	24.6904	33.091	28.3253	28.7022	10.8778	8.96607	8.75067	9.5315	1.61551	0.350027	0.807754	6.11201	0.0269251	2.23479
MG089	North	186	39.7631	141.141	9.9	-6.7	0.99623	0.269251	0.861605	0.709029	40.5223	26.7097	44.965	37.399	6.38126	5.035	5.70813	5.70813	0.511578	0.107701	0.807754	0.475678	0.269251	0.403877	0.547478	0.161551	0.88853	0.376952	0.780829	0.682104	6.00431	10.8508	11.0393	9.29815	0.0807754	24.7711	42.5417	17.7167	28.3432	11.3086	7.00054	10.2046	9.50458	0.350027	0.457728	0.385927	0.323102	0.188476	0.448752
MG090	North	57	43.0044	141.433	7.7	-9.7	0.565428	0.538503	0.88853	0.664154	27.3021	32.741	42.1648	34.0693	5.43888	7.26979	5.78891	6.16586	0.646204	0.188476	0.753904	0.529528	0.430802	0.565428	0.376952	0.161551	1.85784	0.323102	0.700054	0.96033	6.91976	14.5127	8.96607	10.1328	0.107701	30.4793	25.7674	23.4518	26.5661	7.91599	12.4933	9.34303	9.91743	1.18471	0.376952	0.565428	0.484653	0.269251	0.323102
MG091	North	41	41.8956	140.639	8.7	-6.7	0.592353	0.511578	1.18471	0.762879	31.0716	32.2563	50.0269	37.785	5.49273	8.13139	5.22348	6.28253	0.646204	0.107701	0.780829	0.511578	0.673129	0.188476	0.359002	0.0807754	1.45396	0.538503	0.83468	0.94238	8.10447	21.8901	12.1432	14.046	0.0807754	29.9677	21.8901	14.6742	22.1773	8.48142	9.47765	7.29672	8.4186	0.161551	0.861605	0.421827	0.700054	0.0538503	0.323102
MG092	North	0	44.145	143.936	6.4	-11.3	0.457728	0.538503	1.13086	0.709029	36.1335	33.9795	39.9569	36.69	4.11955	5.89661	6.16586	5.394	0.376952	0.107701	0.700054	0.394902	0.134626	0.565428	0.350027	0.161551	2.10016	0.99623	0.861605	1.31933	2.71944	9.77383	9.23533	7.24286	0.188476	35.595	33.468	22.0517	30.3716	8.80452	11.2278	10.5008	10.1777	0.161551	0.619278	0.547478	0.242326	0.242326	0.278227
MG093	North	383	42.0336	140.67	6.8	-8.8	0.457728	0.538503	0.915455	0.637229	32.4179	30.6408	40.0646	34.3744	5.035	5.97738	5.41195	5.47478	0.242326	0.134626	0.88853	0.421827	0.323102	0.861605	0.475678	0.0807754	1.21163	0.511578	0.619278	0.780829	7.08131	11.9009	11.9009	10.2944	0.0807754	34.8411	36.0528	21.8632	30.919	9.55843	8.05062	10.8778	9.4956	0.430802	0.0807754	0.233351	0.350027	0.161551	0.341052
MG094	North	4	42.4186	140.903	8.3	-6.4	0.323102	0.592353	0.969305	0.628253	34.168	32.0409	38.0452	34.7514	5.30425	5.89661	4.98115	5.394	0.323102	0.0807754	0.780829	0.394902	0.188476	0.430802	0.403877	0.0538503	2.26171	0.565428	0.726979	1.18471	2.90792	14.1626	13.9742	10.3482	0.0807754	34.4103	34.4911	23.6672	30.8562	10.6893	7.51212	9.47765	9.22635	0.646204	0.269251	0.394902	0.242326	0.188476	0.251301
MG095	North	83	42.4753	141.22	7.6	-8	0.350027	0.242326	1.40011	0.664154	36.4567	43.3226	42.5687	40.7826	4.73883	3.66182	5.86968	4.75678	0.403877	0.0807754	0.538503	0.341052	0.0538503	0.538503	0.233351	0.0538503	2.18094	0.565428	0.99623	1.24753	3.44642	14.8088	6.59666	8.28397	0.188476	33.818	27.3021	22.4825	27.8675	9.69305	5.97738	11.2009	8.9571	0.94238	0.780829	0.691079	0.161551	0.161551	0.224376
MG096	North	4	42.6028	141.503	7.3	-9.4	0.538503	0.403877	1.15778	0.700054	33.7372	29.0253	38.6645	33.809	3.47334	6.32741	5.95046	5.2504	0.215401	0.0807754	0.83468	0.376952	0.0269251	0.592353	0.242326	0.0538503	2.85407	0.457728	0.780829	1.36421	6.89284	22.9672	13.4356	14.4319	0.134626	33.0641	28.9984	21.3516	27.8047	10.3931	7.59289	8.80452	8.93017	0.242326	0.700054	0.367977	0.0807754	0.296177	0.188476
MG097	North	0	42.4497	140.331	8.2	-6.6	0.376952	0.94238	1.13086	0.816729	32.8218	30.3985	43.2418	35.4873	3.20409	6.46204	5.60043	5.08885	0.242326	0.161551	0.861605	0.421827	1.40011	0.592353	0.664154	0.107701	1.10393	0.538503	0.99623	0.879555	7.00054	10.3662	7.08131	8.14934	0.107701	37.5606	34.2757	23.9903	31.9422	9.45073	9.6392	8.2391	9.10968	0.619278	0.646204	0.457728	0.350027	0.215401	0.260276
MG098	North	704	41.9208	140.728	5.2	-10.7	0.538503	0.619278	0.538503	0.565428	25.7674	30.0754	38.9068	31.5832	5.60043	5.76198	4.55035	5.30425	0.323102	0.161551	0.646204	0.376952	2.01939	0.673129	1.01418	0.107701	3.31179	0.646204	0.726979	1.56166	9.45073	8.83145	17.2859	11.856	0.0538503	30.1292	30.6947	20.5439	27.1226	9.45073	14.2973	8.6699	10.806	0.673129	0.673129	0.529528	0.403877	0.242326	0.951355
MG099	North	6	41.7569	140.723	9.1	-6.4	0.511578	0.969305	0.592353	0.691079	27.4098	29.8061	38.476	31.8973	6.08508	6.16586	5.54658	5.93251	0.403877	0.242326	0.538503	0.394902	1.91169	0.538503	0.879555	0.0807754	1.40011	0.619278	0.484653	0.83468	14.2165	12.2509	21.1093	15.8589	0.0538503	32.3371	30.5331	15.3204	26.0635	8.40065	10.8778	10.2585	9.84563	0.88853	0.215401	0.448752	0.296177	0.0807754	0.332077
MG100	North	5	42.221	140.388	8.3	-6.7	0.538503	0.807754	0.861605	0.735954	32.5794	37.6144	44.4534	38.2158	4.65805	5.2504	4.1734	4.69395	0.350027	0.457728	0.350027	0.385927	1.13086	0.376952	0.511578	0.0807754	0.99623	0.99623	0.969305	0.987255	2.98869	7.67367	12.6548	7.77239	0.269251	34.4373	27.4637	19.3053	27.0687	12.0894	11.524	9.36995	10.9944	0.350027	0.430802	0.341052	0.592353	0.215401	0.332077
MG101	North	142	42.0031	140.651	8	-7.4	0.538503	1.18471	1.61551	1.11291	36.4836	32.2294	41.6263	36.7798	5.035	5.60043	4.9273	5.18758	0.484653	0.242326	0.807754	0.511578	1.77706	0.538503	0.816729	0.215401	1.31933	0.511578	1.83091	1.22061	5.2504	7.99677	5.95046	6.39921	0.296177	35.0027	33.6026	20.3823	29.6625	8.85837	9.23533	13.3279	10.4739	0.753904	0.99623	0.610303	0.269251	0.107701	0.197451
MG102	North	146	45.2961	141.032	5.6	-9.6	0.83468	0.700054	1.05008	0.861605	34.2488	39.58	45.3419	39.7236	4.33495	6.38126	4.14647	4.95423	0.511578	0.726979	0.753904	0.664154	0.484653	0.350027	0.385927	0.0269251	1.02316	0.753904	0.969305	0.915455	3.71567	7.02746	8.53527	6.42614	0.0538503	38.0991	26.4136	20.1669	28.2265	10.5277	11.3086	12.5471	11.4611	0.0807754	0.296177	0.161551	0.780829	0.107701	0.502603
MG103	North	73	42.9936	143.198	6.5	-14.7	0.350027	0.969305	1.61551	0.97828	31.9871	37.9914	41.6263	37.2016	5.86968	6.46204	4.79268	5.70813	0.403877	0.538503	0.700054	0.547478	0.94238	0.350027	0.475678	0.269251	2.58481	0.88853	1.05008	1.50781	6.13893	8.21217	5.84276	6.73129	0.188476	36.0528	27.3021	21.8094	28.3881	7.45827	10.1777	14.3242	10.6534	0.215401	1.05008	0.430802	0.430802	0.107701	0.385927
MG104	South	9	32.0839	131.412	17.3	1.6	0.215401	0.861605	1.61551	0.897505	34.2488	32.2563	41.384	35.963	4.41572	4.0657	4.30802	4.26315	0.403877	0.484653	0.700054	0.529528	0.99623	0.161551	0.394902	0.592353	2.10016	1.34626	1.31933	1.58858	5.57351	7.53904	6.65051	6.58769	0.134626	36.6721	28.6484	21.3786	28.8997	6.89284	15.6974	13.8126	12.1343	1.31933	1.34626	0.90648	0.215401	0.0807754	0.143601
MG105	South	11	32.1181	131.417	17.2	1.6	0.484653	0.753904	0.673129	0.637229	31.5563	28.5137	43.888	34.6527	4.03877	5.76198	4.73883	4.84653	0.215401	0.242326	0.619278	0.359002	1.56166	0.592353	0.780829	0.296177	2.69251	0.83468	0.592353	1.37318	3.87722	9.71998	9.07377	7.55699	0.161551	38.126	33.5757	24.2057	31.9691	7.72752	12.1432	9.39688	9.75588	0.726979	0.538503	0.466703	0.565428	0.242326	0.341052
MG106	South	8	32.0947	131.379	17.2	1.6	0.403877	0.215401	0.861605	0.493628	30.7485	28.433	45.2881	34.8232	5.16963	6.91976	4.8196	5.63633	0.376952	0.188476	0.565428	0.376952	1.91169	0.430802	0.96033	0.242326	1.05008	0.592353	0.673129	0.771854	3.93107	12.3317	8.07754	8.11344	0.134626	37.2644	31.6909	23.9634	30.9729	5.68121	11.147	8.91222	8.58015	0.376952	0.296177	0.233351	0.215401	0.161551	1.42703
MG107	South	64	34.8178	135.522	15.7	1	0.430802	0.538503	0.969305	0.646204	37.4529	31.2062	41.357	36.6721	2.55789	5.19655	4.84653	4.20032	0.323102	0.242326	0.484653	0.350027	1.75013	0.457728	0.744929	0.215401	0.350027	0.807754	0.915455	0.691079	3.58104	11.6047	14.3511	9.84563	0.0269251	35.7297	32.4448	21.0555	29.7433	10.3931	9.88153	8.40065	9.55843	0.619278	0.376952	0.367977	0.726979	0.0538503	0.260276
MG109	North	127	39.7058	141.114	10.2	-6.4	0.296177	0.592353	0.726979	0.538503	43.0264	29.1869	44.7765	38.9966	5.30425	5.1427	4.52342	4.99013	0.269251	0.134626	0.484653	0.296177	1.96554	0.511578	0.861605	0.269251	0.807754	0.538503	0.511578	0.619278	3.50027	11.9548	12.1971	9.21738	0	27.3021	33.0641	20.9478	27.1046	10.9316	10.0969	9.15455	10.061	0.403877	0.969305	0.466703	0.969305	0.0269251	0.332077
MG110	South	592	32.8278	131.134	12.8	-2.7	0.753904	0.457728	1.29241	0.83468	40.1723	26.6828	43.3764	36.7439	5.89661	6.97361	4.87345	5.91456	0.350027	0.161551	0.565428	0.359002	1.40011	0.430802	0.619278	0.0269251	0.565428	0.215401	0.94238	0.574403	4.79268	11.4701	7.24286	7.83522	0.0538503	31.6101	38.2337	22.1325	30.6588	9.12763	9.88153	10.5816	9.86358	0.0538503	1.02316	0.430802	0.296177	0.242326	0.206426
MG111	South	391	32.86	131.001	14	-1.8	0.296177	0.673129	0.646204	0.538503	44.3996	28.8368	38.2337	37.1567	4.41572	6.16586	4.55035	5.04398	0.161551	0	0.376952	0.179501	1.85784	0.99623	0.99623	0.0538503	0.646204	0.592353	1.07701	0.771854	4.8196	12.0625	5.97738	7.61982	0.403877	29.4292	30.7485	32.9295	31.0357	9.5315	10.8508	9.2084	9.86358	0.538503	0.296177	0.367977	0.350027	0.242326	0.269251
MG112	South	697	NA	NA	12.1	-3.1	0.376952	0.215401	0.807754	0.466703	33.7911	25.8751	37.9914	32.5525	4.0657	6.83899	3.958	4.95423	0.430802	0.0807754	0.861605	0.457728	2.55789	0.242326	0.951355	0.0538503	1.13086	0.188476	1.13086	0.816729	14.5396	15.9935	17.3129	15.9487	0.161551	30.587	33.6295	21.8901	28.7022	6.51589	9.28918	8.21217	8.00574	0.215401	0.565428	0.341052	0.350027	0.107701	0.475678
MG113	North	680	32.8631	131.155	12.3	-3.1	0.323102	0.403877	0.969305	0.565428	40.0377	23.6403	38.3414	34.0065	4.22725	4.8196	4.36187	4.46957	0.296177	0.0807754	0.592353	0.323102	3.58104	0.700054	1.58858	0.107701	0.592353	0.484653	1.58858	0.88853	9.2084	10.9316	6.97361	9.03787	0.0807754	27.5983	45.2342	19.5207	30.7844	8.69682	5.73506	18.3899	10.9406	0.269251	1.58858	0.780829	0.726979	0.0269251	0.475678
MG115	South	NA	NA	NA	NA	NA	0.269251	0.188476	0.861605	0.439777	34.9219	29.6177	41.8148	35.4514	3.7426	4.6042	4.73883	4.36187	0.350027	0.0807754	0.646204	0.359002	2.04631	0.0538503	0.726979	0.0538503	0.726979	0.403877	0.753904	0.628253	6.86591	10.0431	13.3818	10.0969	0.134626	36.6182	41.5455	20.3823	32.8487	7.40442	7.18901	7.43134	7.34159	0.215401	0.565428	0.367977	0.215401	0.107701	0.341052
MG116	North	424	35.9	136.653	12	-3.6	0.296177	0.753904	0.969305	0.673129	42.3802	31.3947	39.3646	37.7132	4.84653	4.95423	5.86968	5.22348	0.403877	0.296177	0.592353	0.430802	1.99246	0.403877	0.87058	0.0269251	0.646204	0.376952	0.915455	0.646204	3.90415	8.80452	8.6699	7.12619	0.134626	24.7442	28.9445	24.0172	25.902	9.39688	10.8508	11.6317	10.6265	0.296177	0.323102	0.251301	0.323102	0.457728	0.484653
MG117	North	130	36.0614	136.501	13.4	-1.8	0.269251	0.134626	1.26548	0.556453	37.1029	28.6214	39.7684	35.1642	5.68121	5.19655	5.84276	5.57351	0.350027	0.0269251	0.94238	0.439777	1.80398	0.107701	0.726979	0.0538503	1.02316	0.673129	0.511578	0.735954	3.44642	15.3473	8.80452	9.19943	0.269251	29.6984	33.441	20.5708	27.9034	10.0431	10.4739	11.9817	10.8329	0.188476	0.565428	0.269251	0.242326	0.242326	0.242326
MG118	North	15	35.9747	136.13	14.3	0.2	0.861605	0.215401	0.457728	0.511578	45.8805	28.1906	44.3726	39.4812	8.5622	8.40065	4.25417	7.07234	1.15778	0.107701	0.592353	0.619278	4.22725	0.161551	1.48986	0.0269251	1.13086	0.188476	0.94238	0.753904	5.78891	12.7625	10.3662	9.6392	0.0269251	21.0824	32.5525	20.0323	24.5557	7.94292	9.15455	11.9278	9.6751	0.242326	1.15778	0.520553	0.323102	0.242326	0.332077
MG119	North	NA	NA	NA	NA	NA	0.511578	0.269251	0.726979	0.502603	34.8681	26.9251	48.573	36.7887	13.1125	6.54281	3.79645	7.81727	0.538503	0.0538503	0.484653	0.359002	3.01562	0.161551	1.22958	0.0807754	0.700054	0.296177	0.83468	0.610303	11.524	11.7394	11.7932	11.6855	0	22.0517	36.699	19.1169	25.9558	7.35057	9.18148	7.72752	8.08652	0.403877	0.592353	0.367977	0.457728	0.215401	1.08598
MG120	North	312	36.9878	138.577	12	-4.4	0.726979	0.484653	0.969305	0.726979	46.9844	24.3403	46.3382	39.221	6.05816	8.4545	3.41949	5.97738	0.565428	0.0538503	0.457728	0.359002	2.01939	0.215401	0.816729	0.0807754	0.592353	0.188476	0.700054	0.493628	4.25417	18.0129	10.5547	10.9406	0.0269251	25.2019	33.9257	21.9171	27.0149	9.45073	8.26602	9.04685	8.9212	0.242326	0.430802	0.260276	0.565428	0.0538503	0.332077
MG121	North	317	36.8517	138.366	12.3	-4.4	0.592353	0.350027	0.861605	0.601328	56.3813	28.1906	45.5035	43.3585	4.87345	4.95423	4.30802	4.7119	0.673129	0.0807754	0.673129	0.475678	2.96177	0.107701	1.05008	0.0807754	0.457728	0.134626	0.83468	0.475678	5.38503	13.1933	12.3317	10.3034	0.0538503	18.9284	38.6914	22.4017	26.6738	6.21971	6.11201	7.35057	6.56076	0.511578	0.83468	0.448752	1.31933	0.107701	0.709029
MG122	NA	NA	NA	NA	NA	NA	0.350027	0.215401	1.02316	0.529528	43.511	25.175	45.3689	38.0183	5.2504	5.11578	3.93107	4.76575	0.619278	0.188476	0.403877	0.403877	2.55789	0.323102	1.00521	0.0538503	0.619278	0.188476	0.726979	0.511578	9.18148	13.0587	9.7469	10.6624	0.0269251	26.3597	41.384	23.7211	30.4882	6.13893	5.81583	8.80452	6.91976	0.215401	0.511578	0.314127	1.29241	0.134626	1.20266
MG123	North	813	NA	NA	10.7	-7.3	0.403877	0.673129	0.969305	0.682104	45.0458	35.3527	44.7496	41.716	10.8778	6.05816	4.65805	7.19799	0.323102	0.484653	0.753904	0.520553	0.99623	0.242326	0.430802	0.0269251	0.484653	0.780829	0.807754	0.691079	9.4238	11.7124	8.69682	9.94435	0.0269251	22.1325	28.9984	24.9865	25.3725	5.08885	9.8546	7.61982	7.52109	0.107701	0.619278	0.260276	0.403877	0.161551	0.475678
MG124	North	177	35.9956	138.159	12	-3.9	0.350027	0.673129	0.88853	0.637229	43.4303	36.3489	40.3877	40.0556	3.98492	6.11201	4.30802	4.80165	0.565428	0.296177	0.88853	0.583378	1.23856	0.242326	0.628253	0.0807754	0.673129	0.592353	0.915455	0.726979	6.75821	12.4125	8.10447	9.09173	0.0538503	29.3753	27.8406	25.1481	27.4547	9.4238	9.4238	11.0662	9.97128	0.0807754	0.350027	0.143601	0.592353	0.350027	0.475678
MG125	North	200	37.5142	139.921	11.9	-4.2	0.376952	0.673129	0.861605	0.637229	42.5148	35.4066	37.2375	38.3863	3.71567	5.95046	4.52342	4.72985	0.242326	0.430802	0.619278	0.430802	1.21163	0.134626	0.520553	0.0269251	0.403877	0.83468	0.592353	0.610303	5.97738	11.0932	11.9548	9.6751	0.0538503	31.1793	29.5907	26.7905	29.1869	11.2816	9.23533	9.55843	10.0251	0.0538503	0.376952	0.143601	0.430802	0.134626	0.323102
MG126	North	357	37.1258	140.211	11.2	-4.9	0.242326	0.592353	0.753904	0.529528	36.9144	42.6764	35.9181	38.503	3.87722	5.1427	5.43888	4.8196	0.350027	0.646204	0.700054	0.565428	0.753904	0.107701	0.421827	0.107701	0.350027	0.646204	0.807754	0.601328	5.68121	7.67367	16.2897	9.88153	0.0538503	31.5563	26.1443	20.3016	26.0007	17.0436	9.66613	11.2009	12.6369	0	0.403877	0.134626	0.726979	0.161551	0.341052
MG127	North	5	38.5314	141.222	11.6	-3.4	0.99623	0.511578	1.15778	0.88853	53.0964	39.4992	37.9914	43.529	2.34249	5.78891	5.06193	4.39777	0.430802	0.457728	0.94238	0.610303	0.83468	0.215401	0.412852	0.0807754	0.619278	0.807754	0.83468	0.753904	2.36941	8.5622	13.6511	8.19422	0.107701	18.713	26.7636	21.1901	22.2222	16.0474	11.4701	8.53527	12.0176	0.107701	0.269251	0.179501	0.484653	0.0269251	0.242326
MG128	North	113	36.7833	140.128	13.1	-3.7	0.99623	0.646204	0.753904	0.798779	40.1723	41.8686	41.5186	41.1865	1.48088	5.30425	4.2811	3.68875	0.242326	0.511578	0.700054	0.484653	0.376952	0.134626	0.412852	0	0.376952	0.700054	0.619278	0.565428	2.20786	8.07754	10.3123	6.86591	0.0538503	25.5789	26.979	23.8826	25.4802	23.5326	9.6392	10.0162	14.396	0.161551	0.99623	0.475678	0.673129	0.215401	0.394902
MG129	North	19	39.5453	140.369	11.1	-4.4	0.861605	0.861605	0.969305	0.897505	48.9768	40.1185	38.1799	42.4251	1.99246	5.00808	5.43888	4.14647	0.646204	0.538503	0.969305	0.718004	0.646204	0.107701	0.556453	0.0538503	1.69628	0.565428	0.780829	1.01418	1.83091	8.5622	14.5934	8.32885	0.0807754	20.8939	27.1675	19.5207	22.5274	13.9472	10.3662	11.4701	11.9278	0.0807754	0.673129	0.287202	0.538503	0.134626	0.735954
MG130	South	1341	35.4181	136.406	6.6	-7.5	1.18471	0.538503	0.511578	0.744929	59.37	42.5417	49.7307	50.5475	1.61551	6.03123	3.47334	3.7067	0.323102	0.484653	0.565428	0.457728	0.565428	0.0807754	0.287202	0.107701	0.592353	0.99623	0.565428	0.718004	1.99246	7.21594	11.6317	6.94669	0.134626	20.1939	25.3096	19.3323	21.6119	10.5008	10.42	7.94292	9.62125	0.107701	0.700054	0.287202	0.673129	0.134626	0.323102
MG131	South	NA	34.58	135.62	NA	NA	1.21163	0.673129	0.673129	0.85263	38.1529	32.8487	41.007	37.3362	5.65428	5.89661	5.035	5.52863	0.619278	0.484653	0.753904	0.619278	1.42703	0.0538503	0.691079	0.0269251	1.40011	0.592353	0.538503	0.843655	6.56974	11.1201	19.9785	12.5561	0.107701	27.1675	31.2601	17.8244	25.4173	11.4163	10.07	7.00054	9.4956	0.161551	0.619278	0.359002	0.484653	0.107701	0.457728
MG132	South	107	28.1831	129.373	21.2	11.5	1.34626	0.700054	0.484653	0.843655	46.7959	43.3764	51.4001	47.1908	2.58481	4.65805	3.63489	3.62592	0.726979	0.673129	0.403877	0.601328	0.592353	0.0807754	0.278227	0.0538503	0.592353	0.780829	0.592353	0.655179	2.50404	7.16209	9.23533	6.30048	0.0269251	21.3786	26.252	21.3247	22.9851	17.5283	10.7431	7.61982	11.9637	0.188476	0.215401	0.206426	0.430802	0.269251	0.260276
MG133	South	-1	31.6128	131.434	17.8	2.9	1.53473	0.88853	1.07701	1.16676	39.1761	39.2299	46.1228	41.5096	6.59666	5.54658	5.60043	5.91456	0.673129	0.457728	0.511578	0.547478	1.15778	0.242326	0.726979	0.0538503	1.21163	0.592353	0.619278	0.807754	7.02746	8.75067	7.53904	7.77239	0.107701	23.0479	26.3597	21.8363	23.748	12.8164	10.4739	9.71998	11.0034	0.107701	0.430802	0.359002	0.511578	0.242326	0.359002
MG134	South	88	31.4983	131.384	17.4	2.7	1.66936	0.484653	0.538503	0.897505	38.9068	38.476	56.3005	44.5611	3.33872	6.24663	3.71567	4.43367	0.673129	0.323102	0.592353	0.529528	1.15778	0.188476	0.520553	0.0538503	1.45396	0.646204	0.403877	0.83468	2.39634	10.447	4.3888	5.74403	0	33.441	25.6058	20.6516	26.5661	12.0894	9.9623	7.83522	9.9623	0.134626	0.403877	0.269251	0.83468	0.215401	0.403877
MG135	South	20	31.4731	131.366	17.8	3.2	1.13086	0.969305	0.511578	0.87058	44.7496	41.0609	49.8384	45.2163	2.82714	5.00808	4.0657	3.96697	0.619278	0.538503	0.430802	0.529528	0.673129	0.188476	0.439777	0.0807754	0.99623	0.861605	0.350027	0.735954	3.23102	6.40819	7.43134	5.69018	0.0269251	28.056	26.1982	23.8557	26.0366	12.8971	11.9548	8.61605	11.156	0.350027	0.215401	0.359002	0.969305	0.188476	0.430802
MG136	South	4	31.4586	131.356	17.9	3.3	0.83468	0.780829	0.565428	0.726979	39.7684	40.1723	49.5153	43.152	1.72321	5.1427	3.47334	3.44642	0.350027	0.430802	0.511578	0.430802	0.673129	0.269251	4.41572	0.161551	0.592353	0.861605	0.403877	0.619278	1.72321	7.08131	10.3662	6.39024	0.0807754	26.979	27.2752	20.9747	25.0763	9.15455	11.0932	8.72375	9.65715	0.188476	0.376952	0.278227	0.780829	0.0807754	0.843655
MG137	South	NA	31.4475	131.371	NA	NA	1.21163	0.592353	0.430802	0.744929	40.3608	40.8724	48.923	43.3854	2.77329	6.21971	3.90415	4.29905	0.700054	0.646204	0.484653	0.610303	0.538503	0.134626	0.314127	0.0269251	0.619278	0.969305	0.565428	0.718004	2.12709	6.27356	7.61982	5.34015	0.0807754	31.7986	26.4674	21.1901	26.4854	15.0781	10.3931	11.6047	12.3586	0.242326	0.269251	0.278227	0.726979	0.0538503	0.376952
MG138	South	123	31.4258	131.354	17.2	2.7	0.94238	0.726979	0.484653	0.718004	41.2493	43.3764	43.1072	42.5776	2.12709	5.27733	4.6042	4.00287	0.430802	0.511578	0.83468	0.592353	0.376952	0.350027	0.385927	0.107701	0.94238	0.619278	0.861605	0.807754	1.99246	5.92353	11.6586	6.52486	0.0538503	35.1912	27.1944	23.8288	28.7381	12.951	10.5547	7.21594	10.2405	0.350027	0.107701	0.188476	0.376952	0.215401	0.251301
MG139	South	2	31.8208	131.421	17.6	2.3	0.673129	0.94238	0.619278	0.744929	41.2493	41.5994	43.1879	42.0122	1.56166	5.3581	4.57728	3.83235	0.269251	0.538503	0.646204	0.484653	0.592353	0.161551	0.341052	0.0807754	0.538503	0.83468	0.88853	0.753904	1.64243	8.4545	12.0894	7.39544	0.161551	32.7141	25.4981	23.6672	27.2931	18.3091	9.34303	7.53904	11.7304	0.215401	0.403877	0.251301	0.726979	0.188476	0.359002
MG140	South	16	31.8519	131.399	17.4	2.1	0.700054	0.753904	0.430802	0.628253	46.769	42.6494	44.2111	44.5432	2.12709	5.70813	5.3581	4.39777	0.403877	0.511578	0.673129	0.529528	0.726979	0.161551	0.359002	0.188476	0.673129	0.807754	0.592353	0.691079	1.29241	6.83899	8.53527	5.55556	0	28.5407	25.4173	23.5595	25.8392	16.0474	9.88153	9.55843	11.8291	0.215401	0.350027	0.233351	0.780829	0.242326	0.421827
MG141	South	14	31.9511	131.308	17.3	1.7	0.484653	0.969305	0.700054	0.718004	56.9198	41.0878	48.4114	48.8063	1.77706	5.97738	4.0657	3.94005	0.457728	0.646204	0.538503	0.547478	0.673129	0.0538503	0.332077	0.0807754	0.83468	0.915455	0.457728	0.735954	1.88476	6.24663	12.601	6.91079	0.0538503	21.567	26.1174	18.8745	22.1863	11.6317	10.5277	7.00054	9.71998	0.376952	0.188476	0.233351	0.592353	0.188476	0.350027
MG142	South	0	31.6447	131.431	17.7	2.8	1.15778	0.83468	0.861605	0.951355	45.4496	38.6376	38.4222	40.8365	2.42326	5.73506	5.3581	4.50547	0.350027	0.457728	0.538503	0.448752	0.88853	0.0538503	0.403877	0.161551	0.538503	1.02316	0.592353	0.718004	1.61551	8.02369	14.2434	7.96087	0.0807754	26.3597	26.0366	23.4518	25.2827	15.6974	11.2009	7.99677	11.6317	0.430802	0.673129	0.403877	0.565428	0.188476	0.269251
MG143	South	0	31.6453	131.467	17.7	2.8	1.53473	0.646204	0.807754	0.99623	40.8454	41.2493	39.8492	40.648	2.74637	5.11578	6.27356	4.7119	0.538503	0.376952	0.457728	0.457728	0.94238	0.0538503	0.385927	0.0538503	0.511578	0.969305	0.700054	0.726979	1.75013	6.83899	10.8508	6.47999	0.0538503	32.1756	27.706	23.7749	27.8855	14.6473	9.69305	8.61605	10.9855	0.457728	0.538503	0.367977	0.700054	0.134626	0.296177
MG144	South	0	31.6447	131.466	17.7	2.8	1.45396	0.861605	1.23856	1.18471	41.5994	38.2876	42.5417	40.8095	3.52719	4.84653	5.22348	4.5324	0.403877	0.94238	0.726979	0.691079	0.700054	0.296177	0.376952	0.403877	0.99623	1.34626	0.700054	1.01418	1.69628	5.08885	7.43134	4.73883	0.107701	29.6446	23.7211	23.748	25.7045	14.378	15.1589	10.3931	13.31	1.50781	0.484653	0.843655	0.403877	0.484653	0.341052
MG145	South	148	31.6269	131.458	16.9	1.9	1.45396	0.700054	0.592353	0.915455	43.5918	41.5455	42.7033	42.6135	2.63866	5.16963	4.57728	4.12852	0.403877	0.592353	0.538503	0.511578	0.403877	0.161551	0.296177	0.0807754	0.94238	0.565428	0.592353	0.700054	2.31556	6.59666	8.07754	5.66326	0.0269251	29.4561	25.902	24.4211	26.5931	11.2816	12.0625	11.5778	11.6406	0.296177	0.134626	0.215401	0.592353	0.215401	0.421827
MG146	NA	5	NA	NA	16.3	2.8	1.42703	0.484653	1.02316	0.97828	42.434	39.9838	39.4723	40.63	2.23479	5.3581	5.41195	4.33495	0.673129	0.376952	0.88853	0.646204	0.915455	0.0269251	0.385927	0.0269251	0.700054	0.99623	1.34626	1.01418	2.45019	8.64297	19.8708	10.3213	0.0538503	29.1599	26.4674	16.7744	24.1339	14.8627	11.0393	6.73129	10.8778	0.538503	0.188476	0.278227	0.565428	0.134626	0.296177
MG148	NA	NA	NA	NA	NA	NA	1.18471	0.538503	0.83468	0.85263	50.6731	41.1955	47.3344	46.401	2.98869	5.3581	5.11578	4.48752	0.511578	0.565428	0.83468	0.637229	1.37318	0.0538503	0.484653	0.0807754	0.94238	0.83468	0.592353	0.789804	1.69628	6.97361	12.5471	7.07234	0.0807754	23.8288	27.6791	18.336	23.2813	12.3586	9.82768	6.65051	9.61228	0.215401	0.350027	0.224376	0.538503	0.0538503	0.233351
MG149	South	24	34.1034	129.167	15.8	2.2	1.61551	0.673129	0.726979	1.00521	42.5148	41.9494	38.3953	40.9532	3.82337	5.60043	5.19655	4.87345	0.619278	0.430802	0.780829	0.610303	0.861605	0.0807754	0.421827	0.161551	0.83468	0.538503	0.753904	0.709029	2.50404	6.97361	9.28918	6.25561	0.107701	28.2445	25.8212	27.706	27.2572	11.874	11.3893	8.29295	10.5188	0.215401	0.323102	0.269251	0.376952	0.242326	0.260276
MG150	South	55	34.1072	129.173	15.8	2.2	1.61551	0.673129	0.915455	1.06803	32.0948	41.0878	37.7491	36.9772	3.12332	5.62736	4.44265	4.39777	0.861605	0.592353	0.350027	0.601328	0.83468	0.0269251	2.53994	0.161551	1.40011	0.673129	1.05008	1.04111	2.42326	7.32364	13.3279	7.69162	0.107701	32.4717	25.175	25.3366	27.6611	10.797	11.5778	8.5622	10.3123	0.242326	0.457728	0.610303	0.457728	0.107701	0.673129
MG151	South	4	34.1079	129.21	15.8	2.2	1.80398	0.565428	1.26548	1.21163	36.3489	37.8837	37.9645	37.399	2.80022	5.27733	6.21971	4.76575	0.646204	0.484653	0.83468	0.655179	1.29241	0.0538503	0.601328	0.0269251	1.29241	0.94238	1.31933	1.18471	2.61174	7.40442	11.4701	7.16209	0	39.553	30.3716	21.7286	30.5511	9.4238	9.8546	8.8853	9.3879	0.376952	0.350027	0.278227	0.430802	0.0807754	0.170526
MG152	NA	0	NA	NA	15.8	2.2	0.753904	0.619278	0.753904	0.709029	38.3683	43.2687	36.1874	39.2748	5.19655	5.41195	6.24663	5.61838	0.323102	0.619278	0.780829	0.574403	0.565428	0.0538503	0.403877	0.0269251	0.726979	0.753904	0.915455	0.798779	4.6042	6.73129	17.7706	9.70203	0.0269251	33.5757	26.4136	19.7631	26.5841	10.7431	9.77383	8.15832	9.55843	0.188476	0.484653	0.296177	0.511578	0.134626	0.367977
MG154	South	5	34.665	129.49	15.7	3.2	1.61551	0.511578	1.26548	1.13086	39.93	37.426	40.1454	39.1671	5.1427	5.54658	6.56974	5.75301	0.619278	0.403877	0.700054	0.574403	1.13086	0.134626	0.547478	0	0.780829	0.646204	0.94238	0.789804	5.16963	8.69682	9.98923	7.95189	0.107701	29.2138	28.783	21.6209	26.5392	10.1777	9.50458	10.0969	9.9264	0.969305	0.376952	0.520553	0.538503	0.161551	0.385927
MG155	NA	16	NA	NA	15.7	3.2	NA	NA	NA	NA	NA	NA	NA	NA	NA	NA	NA	NA	NA	NA	NA	NA	NA	NA	NA	NA	NA	NA	NA	NA	NA	NA	NA	NA	NA	NA	NA	NA	NA	NA	NA	NA	NA	NA	NA	NA	NA	NA	NA
MG156	South	7	34.6835	129.472	15.7	3.2	1.05008	1.05008	0.538503	0.879555	45.3419	38.8799	36.699	40.3069	3.28487	5.89661	4.1734	4.45162	0.376952	0.673129	0.673129	0.574403	0.700054	0.0538503	0.314127	0.188476	1.05008	1.31933	0.323102	0.897505	2.42326	7.88907	20.49	10.2675	0.161551	33.4141	26.3597	21.4324	27.0687	7.61982	10.2585	7.94292	8.60707	0.376952	0.350027	0.323102	0.646204	0.0538503	0.287202
MG162	South	NA	32.7927	128.807	NA	NA	1.50781	0.726979	0.565428	0.933405	34.0334	39.3915	41.8417	38.4222	3.36564	5.49273	5.49273	4.7837	0.323102	0.430802	0.700054	0.484653	0.673129	0.0269251	0.332077	0.161551	0.969305	0.807754	0.673129	0.816729	4.01185	7.24286	12.3317	7.86214	0.134626	38.9338	27.2752	22.5902	29.5997	10.7431	11.1201	8.69682	10.1867	0.134626	0.215401	0.233351	0.592353	0.107701	0.269251
MG163	South	NA	32.7703	128.684	NA	NA	0.646204	0.83468	0.565428	0.682104	33.7911	42.5417	39.6607	38.6645	4.55035	5.30425	6.89284	5.58248	0.323102	0.619278	0.915455	0.619278	0.780829	0.134626	0.394902	0.107701	1.10393	1.37318	0.592353	1.02316	5.1427	6.00431	16.7205	9.28918	0.0269251	37.4529	24.825	16.5051	26.261	9.50458	10.3662	9.2084	9.69305	0.242326	0.161551	0.269251	0.430802	0.242326	0.529528
MG170	South	NA	32.6184	128.632	NA	NA	0.861605	0.969305	0.619278	0.816729	39.0953	40.9262	37.8029	39.2748	4.46957	5.43888	6.32741	5.41195	0.565428	0.646204	0.538503	0.583378	0.565428	0.107701	0.260276	0.188476	1.31933	0.646204	0.565428	0.843655	4.55035	6.19278	20.4631	10.4021	0.107701	32.2025	26.2251	15.3743	24.6006	9.7469	11.6047	6.94669	9.43278	0.188476	0.269251	0.251301	0.592353	0.161551	0.466703
MG172	South	NA	32.6539	128.801	NA	NA	0.807754	1.05008	0.726979	0.861605	45.0996	41.357	44.0495	43.5021	3.98492	5.70813	5.68121	5.12475	0.511578	0.646204	0.592353	0.583378	0.646204	0.296177	0.376952	0.0807754	1.10393	0.94238	0.242326	0.762879	3.17717	6.00431	12.0894	7.09029	0.134626	27.3021	25.6327	16.9898	23.3082	8.40065	11.9009	9.66613	9.98923	0.350027	0.592353	0.430802	0.673129	0.215401	0.493628
MG176	South	NA	32.6546	128.893	NA	NA	0.753904	0.861605	0.511578	0.709029	53.8234	42.9995	44.2649	47.0293	3.39257	6.11201	5.49273	4.9991	0.403877	0.430802	0.511578	0.448752	0.673129	0.188476	0.601328	0.161551	1.42703	0.83468	0.403877	0.88853	9.36995	6.70436	12.7894	9.62125	0.107701	16.0743	24.0172	17.7975	19.2964	6.30048	11.4701	9.3161	9.0289	0.269251	0.484653	0.359002	0.511578	0.107701	0.664154
MG187	South	NA	33.2169	129.048	NA	NA	1.21163	0.780829	1.07701	1.02316	51.1039	39.1492	46.4728	45.5753	4.22725	5.68121	6.16586	5.3581	0.565428	0.376952	0.565428	0.502603	0.807754	0.188476	0.421827	0.107701	1.05008	1.02316	0.565428	0.879555	3.01562	9.3161	8.3468	6.89284	0.0269251	19.6554	26.8174	19.9515	22.1414	12.0086	9.61228	7.48519	9.70203	0.188476	0.700054	0.376952	0.565428	0.134626	0.287202
MG188	North	NA	42.0156	143.265	NA	NA	1.21163	0.83468	0.242326	0.762879	39.553	37.399	47.0652	41.3391	4.98115	4.84653	3.44642	4.4247	0.457728	0.350027	0.538503	0.448752	1.18471	0.0538503	0.646204	0.0269251	1.15778	0.646204	0.646204	0.816729	4.79268	10.1239	18.1206	11.0124	0.0538503	28.9445	30.1023	18.0398	25.6956	10.0431	9.2084	5.08885	8.11344	0.376952	0.753904	0.457728	0.511578	0.0269251	0.403877
MG196	North	NA	40.6756	140.941	NA	NA	0.646204	0.726979	1.29241	0.88853	44.2649	43.1341	44.5342	43.9777	7.02746	5.41195	4.22725	5.55556	0.700054	0.430802	0.780829	0.637229	0.861605	0.592353	0.511578	0.0807754	0.780829	0.807754	1.72321	1.10393	8.58912	8.42757	7.13516	8.05062	0.430802	19.8977	24.448	20.14	21.4952	9.23533	9.5315	9.71998	9.4956	0.592353	1.21163	0.709029	0.700054	0.0807754	0.825705
MG198	North	NA	40.5095	141.61	NA	NA	1.48088	1.05008	1.26548	1.26548	48.0075	42.3263	43.7534	44.6957	4.7119	5.08885	2.55789	4.11955	0.753904	0.430802	0.592353	0.592353	0.565428	0.511578	0.376952	0.0269251	0.753904	0.915455	1.58858	1.08598	3.79645	6.48896	7.86214	6.04918	0.323102	21.594	25.6058	19.413	22.2043	10.0162	11.524	12.1432	11.2278	0.215401	0.94238	0.448752	0.511578	0.134626	0.278227
MG201	North	NA	40.511	141.611	NA	NA	0.94238	0.780829	0.269251	0.664154	47.496	40.9532	40.1454	42.8648	5.92353	5.73506	4.3888	5.34913	0.646204	0.565428	0.700054	0.637229	0.673129	0.0538503	0.314127	0.188476	0.619278	0.565428	0.700054	0.628253	4.4965	7.13516	17.986	9.87255	0.107701	20.3554	25.6058	20.7593	22.2402	10.5547	11.1201	6.05816	9.2443	0.430802	0.780829	0.619278	0.700054	0.0538503	0.475678
MG202	North	NA	35.0577	140.074	NA	NA	1.15778	0.88853	0.457728	0.83468	42.7033	40.3877	44.7765	42.6225	6.35433	5.70813	4.01185	5.3581	0.538503	0.457728	0.376952	0.457728	0.646204	0	0.260276	0.0538503	1.07701	0.915455	0.619278	0.87058	4.65805	7.16209	19.0361	10.2854	0.296177	24.6634	25.525	16.2897	22.1594	9.55843	12.0355	6.21971	9.27123	0.376952	0.538503	0.332077	0.646204	0.0538503	0.332077
MG203	North	NA	35.0578	140.072	NA	NA	1.42703	0.807754	0.511578	0.915455	40.6839	40.28	44.8573	41.9404	7.40442	6.05816	4.73883	6.06713	0.646204	0.83468	0.673129	0.718004	0.511578	0.0538503	0.296177	0.0269251	0.915455	1.07701	0.511578	0.83468	7.75444	8.18525	16.0205	10.6534	0.0538503	23.6672	24.825	17.5552	22.0158	6.78514	10.7431	7.02746	8.18525	0.323102	1.64243	0.700054	0.969305	0.0269251	0.484653
MG204	North	NA	34.9004	139.888	NA	NA	1.66936	0.619278	0.376952	0.88853	51.4809	41.0878	48.2229	46.9305	5.68121	5.22348	4.1734	5.02603	0.646204	0.807754	0.484653	0.646204	0.619278	0	0.206426	0.107701	0.807754	1.02316	0.511578	0.780829	4.25417	6.97361	14.7281	8.65195	0.107701	17.3667	25.0404	18.2283	20.2118	9.66613	11.9548	6.54281	9.3879	0.376952	0.94238	0.502603	0.619278	0.0269251	0.260276
MG205	North	NA	35.2855	140.085	NA	NA	1.58858	0.861605	0.215401	0.88853	41.4647	39.2569	49.9731	43.5649	7.10824	5.035	2.66559	4.93628	1.53473	0.565428	0.242326	0.780829	0.94238	1.66936	1.57063	0.188476	0.88853	1.05008	0.350027	0.762879	6.89284	6.94669	5.60043	6.47999	0.0538503	19.5746	28.433	24.2326	24.0801	9.77383	10.2046	9.4238	9.80075	0.484653	0.915455	0.502603	0.323102	0.0538503	0.215401
MG206	North	NA	38.6573	140.874	NA	NA	1.40011	0.511578	0.376952	0.762879	42.2456	27.4637	40.9801	36.8964	11.6047	4.79268	4.44265	6.94669	0.807754	0.215401	0.726979	0.583378	3.52719	0.403877	1.43601	0.161551	0.700054	0.83468	0.565428	0.700054	6.65051	13.3279	15.7512	11.9099	0.0807754	19.7092	34.6527	20.4362	24.9327	7.91599	9.39688	9.39688	8.90325	0.403877	0.403877	0.897505	0.161551	0.107701	0.179501
MG207	South	NA	35.1457	136.66	NA	NA	1.42703	0.700054	0.430802	0.85263	37.4798	40.4685	44.4803	40.8095	6.51589	5.38503	3.79645	5.23245	0.83468	0.673129	0.350027	0.619278	0.511578	0.0807754	0.565428	0.0538503	0.861605	1.31933	0.403877	0.861605	6.19278	6.51589	9.3161	7.34159	0.0807754	30.9908	25.7943	24.5288	27.1046	7.00054	11.2547	11.3624	9.87255	0.350027	0.269251	0.233351	0.780829	0.107701	0.592353
MG209	South	NA	33.3976	129.436	NA	NA	1.75013	0.726979	0.376952	0.951355	37.0759	39.3646	52.9887	43.1431	6.05816	6.62359	3.41949	5.36708	0.753904	0.457728	0.188476	0.466703	0.565428	0.161551	0.367977	0.134626	1.02316	1.23856	0.350027	0.87058	10.3931	7.59289	10.1777	9.3879	0.134626	19.6284	25.7674	18.2014	21.1991	12.4933	11.6317	7.91599	10.6803	0.350027	1.42703	0.619278	0.673129	0.0538503	0.484653
MG221	South	NA	33.4176	129.424	NA	NA	1.69628	0.673129	0.538503	0.969305	46.3113	33.468	53.7695	44.5162	6.67744	5.16963	5.70813	5.85173	0.969305	0.565428	0.403877	0.646204	1.02316	0.242326	0.565428	0.0538503	0.861605	1.29241	0.457728	0.87058	7.94292	9.2084	7.80829	8.31987	0.161551	18.1475	33.3064	16.2089	22.5543	7.88907	10.2316	6.05816	8.05959	0.188476	2.10016	0.861605	0.511578	0.0538503	0.412852
MG222	South	NA	33.3725	129.433	NA	NA	0.726979	0.94238	0.430802	0.700054	41.007	40.3339	45.8535	42.3981	4.57728	5.84276	5.33118	5.2504	0.592353	0.565428	0.350027	0.502603	0.538503	0.0538503	0.242326	0.0807754	1.13086	0.753904	0.565428	0.816729	10.447	7.00054	15.3743	10.9406	0.457728	23.7749	26.0097	16.8013	22.1953	7.43134	12.0894	7.08131	8.86735	0.161551	0.619278	0.403877	0.565428	0.0269251	0.350027
MG225	South	NA	33.5292	129.951	NA	NA	1.05008	0.861605	0.403877	0.771854	39.2299	41.6263	52.6925	44.5162	5.54658	5.06193	3.44642	4.68498	0.807754	0.619278	0.242326	0.556453	0.323102	0.0538503	0.170526	0.134626	1.02316	0.861605	0.457728	0.780829	4.20032	4.30802	8.61605	5.70813	0.269251	28.406	28.5137	21.594	26.1712	9.66613	11.147	6.40819	9.07377	0.215401	0.807754	0.421827	0.511578	0.0807754	0.475678
[truncated: 254 more columns]

## Sheet: GWAS traits
Trait	Bacteria
02e0741a64714c848755712ba9d2e994_3	Yes
5508c13ba9291cd1194a4993d1932135_2	Yes
5508c13ba9291cd1194a4993d1932135_3	Yes
8a5e985bff5d31f7ced74218807d9f08_2	Yes
LjNodule209_1	Yes
LjNodule209_2	Yes
LjNodule209_3	Yes
LjRoot104_1	Yes
LjRoot104_2	Yes
LjRoot104_3	Yes
LjRoot10_1	Yes
LjRoot10_2	Yes
LjRoot10_3	Yes
LjRoot117_1	Yes
LjRoot117_2	Yes
LjRoot117_3	Yes
LjRoot122_1	Yes
LjRoot122_2	Yes
LjRoot122_3	Yes
LjRoot134_2	Yes
LjRoot134_3	Yes
LjRoot149_1	Yes
LjRoot149_2	Yes
LjRoot149_3	Yes
LjRoot152_1	Yes
LjRoot152_2	Yes
LjRoot152_3	Yes
LjRoot162_1	Yes
LjRoot162_2	Yes
LjRoot162_3	Yes
LjRoot17_1	Yes
LjRoot17_2	Yes
LjRoot17_3	Yes
LjRoot183_1	Yes
LjRoot183_2	Yes
LjRoot183_3	Yes
LjRoot18_2	Yes
LjRoot18_3	Yes
LjRoot196_1	Yes
LjRoot196_2	Yes
LjRoot196_3	Yes
LjRoot1_1	Yes
LjRoot1_2	Yes
LjRoot1_3	Yes
LjRoot20_1	Yes
LjRoot20_2	Yes
LjRoot20_3	Yes
LjRoot21_1	Yes
LjRoot21_2	Yes
LjRoot21_3	Yes
LjRoot221_1	Yes
LjRoot221_2	Yes
LjRoot221_3	Yes
LjRoot223_1	Yes
LjRoot223_2	Yes
LjRoot223_3	Yes
LjRoot226_1	Yes
LjRoot226_2	Yes
LjRoot226_3	Yes
LjRoot227_1	Yes
LjRoot227_2	Yes
LjRoot227_3	Yes
LjRoot229_2	Yes
LjRoot229_3	Yes
LjRoot22_1	Yes
LjRoot22_2	Yes
LjRoot22_3	Yes
LjRoot237_1	Yes
LjRoot237_2	Yes
LjRoot237_3	Yes
LjRoot243_1	Yes
LjRoot244_2	Yes
LjRoot244_3	Yes
LjRoot251_3	Yes
LjRoot257_2	Yes
LjRoot259_1	Yes
LjRoot259_2	Yes
LjRoot259_3	Yes
LjRoot25_1	Yes
LjRoot25_2	Yes
LjRoot25_3	Yes
LjRoot26_1	Yes
LjRoot26_2	Yes
LjRoot26_3	Yes
LjRoot270_1	Yes
LjRoot270_2	Yes
LjRoot270_3	Yes
LjRoot277_1	Yes
LjRoot277_2	Yes
LjRoot277_3	Yes
LjRoot279_1	Yes
LjRoot279_2	Yes
LjRoot279_3	Yes
LjRoot281_1	Yes
LjRoot281_2	Yes
LjRoot281_3	Yes
LjRoot282_1	Yes
LjRoot282_2	Yes
LjRoot282_3	Yes
LjRoot289_1	Yes
LjRoot289_2	Yes
LjRoot289_3	Yes
LjRoot28_1	Yes
LjRoot28_2	Yes
LjRoot28_3	Yes
LjRoot291_2	Yes
LjRoot291_3	Yes
LjRoot296_1	Yes
LjRoot296_2	Yes
LjRoot296_3	Yes
LjRoot30_1	Yes
LjRoot30_2	Yes
LjRoot3_1	Yes
LjRoot3_2	Yes
LjRoot3_3	Yes
LjRoot4_1	Yes
LjRoot4_2	Yes
LjRoot4_3	Yes
LjRoot54_1	Yes
LjRoot54_2	Yes
LjRoot54_3	Yes
LjRoot62_1	Yes
LjRoot62_2	Yes
LjRoot62_3	Yes
LjRoot67_1	Yes
LjRoot67_2	Yes
LjRoot67_3	Yes
LjRoot70_1	Yes
LjRoot71_1	Yes
LjRoot71_2	Yes
LjRoot71_3	Yes
LjRoot72_1	Yes
LjRoot72_2	Yes
LjRoot72_3	Yes
LjRoot78_1	Yes
LjRoot78_2	Yes
LjRoot78_3	Yes
LjRoot82_1	Yes
LjRoot82_2	Yes
LjRoot82_3	Yes
LjRoot83_3	Yes
LjRoot92_1	Yes
LjRoot92_2	Yes
LjRoot92_3	Yes
LjRoot98_1	Yes
LjRoot98_2	Yes
LjRoot98_3	Yes
d125db2116b8b1ff5b6bd9f62a1aa0e0_1	Yes
d125db2116b8b1ff5b6bd9f62a1aa0e0_2	Yes
d125db2116b8b1ff5b6bd9f62a1aa0e0_3	Yes
e50bcdddb564109b7ce00c484def7373_2	Yes
LjNodule209_ave	Yes
LjRoot104_ave	Yes
LjRoot10_ave	Yes
LjRoot117_ave	Yes
LjRoot122_ave	Yes
LjRoot149_ave	Yes
LjRoot152_ave	Yes
LjRoot162_ave	Yes
LjRoot17_ave	Yes
LjRoot183_ave	Yes
LjRoot196_ave	Yes
LjRoot1_ave	Yes
LjRoot20_ave	Yes
LjRoot21_ave	Yes
LjRoot221_ave	Yes
LjRoot223_ave	Yes
LjRoot226_ave	Yes
LjRoot227_ave	Yes
LjRoot22_ave	Yes
LjRoot237_ave	Yes
LjRoot259_ave	Yes
LjRoot25_ave	Yes
LjRoot26_ave	Yes
LjRoot270_ave	Yes
LjRoot277_ave	Yes
LjRoot279_ave	Yes
LjRoot281_ave	Yes
LjRoot282_ave	Yes
LjRoot289_ave	Yes
LjRoot28_ave	Yes
LjRoot296_ave	Yes
LjRoot3_ave	Yes
LjRoot4_ave	Yes
LjRoot54_ave	Yes
LjRoot62_ave	Yes
LjRoot67_ave	Yes
LjRoot71_ave	Yes
LjRoot72_ave	Yes
LjRoot78_ave	Yes
LjRoot82_ave	Yes
LjRoot92_ave	Yes
LjRoot98_ave	Yes
d125db2116b8b1ff5b6bd9f62a1aa0e0_ave	Yes
MDS1_1	Yes
MDS2_1	Yes
MDS1_2	Yes
MDS2_2	Yes
MDS1_3	Yes
MDS2_3	Yes
MDS1_ave	Yes
MDS2_ave	Yes
NMDS1_1	Yes
NMDS2_1	Yes
NMDS1_2	Yes
NMDS2_2	Yes
NMDS1_3	Yes
NMDS2_3	Yes
NMDS1_ave	Yes
NMDS2_ave	Yes
pca1_1	Yes
pca2_1	Yes
pca1_2	Yes
pca2_2	Yes
pca1_3	Yes
pca2_3	Yes
pca1_ave	Yes
pca2_ave	Yes
Beijerinckiaceae_ave	Yes
Burkholderiaceae_ave	Yes
Caulobacteraceae_ave	Yes
Devosiaceae_ave	Yes
Enterobacteriaceae_ave	Yes
Flavobacteriaceae_ave	Yes
Micrococcaceae_ave	Yes
Pseudomonadaceae_ave	Yes
Rhizobiaceae_ave	Yes
Rhodanobacteraceae_ave	Yes
Sphingobacteriaceae_ave	Yes
Sphingomonadaceae_ave	Yes
Xanthobacteraceae_ave	Yes
Xanthomonadaceae_ave	Yes
Beijerinckiaceae_1	Yes
Beijerinckiaceae_2	Yes
Beijerinckiaceae_3	Yes
Burkholderiaceae_1	Yes
Burkholderiaceae_2	Yes
Burkholderiaceae_3	Yes
Caulobacteraceae_1	Yes
Caulobacteraceae_2	Yes
Caulobacteraceae_3	Yes
Devosiaceae_1	Yes
Devosiaceae_2	Yes
Devosiaceae_3	Yes
Enterobacteriaceae_2	Yes
Enterobacteriaceae_3	Yes
Flavobacteriaceae_1	Yes
Flavobacteriaceae_2	Yes
Flavobacteriaceae_3	Yes
Microbacteriaceae_2	Yes
Micrococcaceae_1	Yes
Micrococcaceae_2	Yes
Micrococcaceae_3	Yes
Mycobacteriaceae_3	Yes
Pseudomonadaceae_1	Yes
Pseudomonadaceae_2	Yes
Pseudomonadaceae_3	Yes
Rhizobiaceae_1	Yes
Rhizobiaceae_2	Yes
Rhizobiaceae_3	Yes
Rhodanobacteraceae_2	Yes
Rhodanobacteraceae_3	Yes
Sphingobacteriaceae_2	Yes
Sphingobacteriaceae_3	Yes
Sphingomonadaceae_1	Yes
Sphingomonadaceae_2	Yes
Sphingomonadaceae_3	Yes
Weeksellaceae_2	Yes
Xanthobacteraceae_1	Yes
Xanthobacteraceae_2	Yes
Xanthobacteraceae_3	Yes
Xanthomonadaceae_1	Yes
Xanthomonadaceae_2	Yes
Xanthomonadaceae_3	Yes
Altitude	No
Mean_temp	No
Min_temp	No
FT_DK	No
Seed_weight	No
Seed_size	No
Seed_perimeter	No
Seed_length	No
Seed_width	No
Seed_LWR	No
Seed_circularity	No
OW_2014	No
OW_2015	No
OW_2016	No
OW_2017	No
1st_ft	No
2nd_ft	No
2nd_ft_period	No
FP_2014	No
2015_16_2nd_year_FT	No
2017_FT	No
2018_FT	No
K_contr	No
N_contr	No
K_salt	No
N_salt	No

## Sheet: 78 SNPs
Chromosome	new_position	n	Trait	SNP	Position	P.value	effect	Method	Q.value	MAF	Trial
1	1175300	3	MDS2	SNP_1_1175308	1175308	2.27254e-14	-0.0624703	FarmCPU	1.92314e-08	0.316129	ave
1	1175300	3	MDS2	SNP_1_1175308	1175308	3.01023e-10	-0.0517	ISIS EM-BLASSO	NA	0.3161	ave
1	1175300	3	NMDS2	SNP_1_1175308	1175308	2.27254e-14	-0.0624703	FarmCPU	1.92314e-08	0.316129	ave
1	1175300	3	NMDS2	SNP_1_1175308	1175308	3.01023e-10	-0.0517	ISIS EM-BLASSO	NA	0.3161	ave
1	7835200	3	LjRoot226	SNP_1_7835213	7835213	2.14108e-08	13.2399	Gemma	0.00158061	0.052	1
1	7835200	3	LjRoot226	SNP_1_7835213	7835213	4.16727e-07	5.49975	Gemma	0.0121565	0.052	ave
1	8130200	3	LjRoot226	SNP_1_8130226	8130226	1.8617e-07	13.3231	Gemma	0.00489884	0.058	1
1	8130200	3	LjRoot226	SNP_1_8130226	8130226	3.91853e-08	6.17297	Gemma	0.00561066	0.058	ave
1	11707700	3	Burkholderiaceae	SNP_1_11707727	11707727	9.90148e-09	2.7105	ISIS EM-BLASSO	NA	0.0613	3
1	11707700	3	Burkholderiaceae	SNP_1_11707727	11707727	1.7329e-07	3.97184	Gemma	0.0312588	0.061	ave
1	88153800	3	LjRoot1	SNP_1_88153756	88153756	6.69958e-11	4.59894	FarmCPU	1.41739e-05	0.083871	2
1	88153800	3	LjRoot1	SNP_1_88153756	88153756	3.5416e-10	2.1218	ISIS EM-BLASSO	NA	0.0839	ave
1	92029100	5	LjRoot243	SNP_1_92029102	92029102	5.47881e-08	4.94131	Gemma	0.000724446	0.052	1
1	92029100	5	LjRoot243	SNP_1_92029103	92029103	5.47881e-08	4.94131	Gemma	0.000724446	0.052	1
1	92029100	5	Sphingomonadaceae	SNP_1_92029102	92029102	2.25354e-07	0.280493	Gemma	0.00359823	0.052	ave
1	92029100	5	Sphingomonadaceae	SNP_1_92029103	92029103	2.25354e-07	0.280493	Gemma	0.00359823	0.052	ave
1	92029100	5	pca1	SNP_1_92029102	92029102	3.6576e-10	-2.5725	Gemma	2.81387e-05	0.052	ave
1	92029100	5	pca1	SNP_1_92029103	92029103	3.6576e-10	-2.5725	Gemma	2.81387e-05	0.052	ave
1	102706500	3	LjRoot226	SNP_1_102706511	102706511	1.28521e-08	-12.0936	Gemma	0.00127556	0.058	1
1	102706500	3	LjRoot226	SNP_1_102706511	102706511	8.57289e-07	-5.1256	Gemma	0.0161118	0.058	ave
1	114608600	3	LjRoot92	SNP_1_114608570	114608570	1.53462e-10	47.2181	ISIS EM-BLASSO	NA	0.0548	1
1	114608600	3	LjRoot92	SNP_1_114608570	114608570	2.17171e-08	67.5467	Gemma	0.00918906	0.055	1
1	114608600	3	LjRoot92	SNP_1_114608570	114608570	6.24489e-07	22.4296	Gemma	0.451714	0.055	ave
1	132682700	3	LjRoot282	SNP_1_132682722	132682722	3.07751e-09	20.7135	ISIS EM-BLASSO	NA	0.3903	2
1	132682700	3	LjRoot282	SNP_1_132682722	132682722	1.88973e-09	16.093	ISIS EM-BLASSO	NA	0.3903	ave
1	132735000	3	LjRoot282	SNP_1_132735036	132735036	7.40952e-07	115.007	Gemma	0.0217021	0.052	1
1	132735000	3	LjRoot282	SNP_1_132735036	132735036	1.61814e-07	55.3154	Gemma	0.00370097	0.052	ave
1	132768400	3	LjRoot282	SNP_1_132768393	132768393	7.40952e-07	115.007	Gemma	0.0217021	0.052	1
1	132768400	3	LjRoot282	SNP_1_132768393	132768393	1.61814e-07	55.3154	Gemma	0.00370097	0.052	ave
1	134224600	3	LjRoot62	SNP_1_134224562	134224562	6.52861e-07	-23.1457	Gemma	0.0195344	0.061	1
1	134224600	3	LjRoot62	SNP_1_134224562	134224562	7.87689e-07	-10.506	Gemma	0.168378	0.061	ave
2	60223400	4	MDS2	SNP_2_60223445	60223445	4.98076e-07	0.0633286	FarmCPU	0.0702494	0.435484	1
2	60223400	4	MDS2	SNP_2_60223445	60223445	3.52371e-07	0.063	ISIS EM-BLASSO	NA	0.4355	1
2	60223400	4	MDS2	SNP_2_60223445	60223445	9.85372e-07	0.037	ISIS EM-BLASSO	NA	0.4355	ave
2	60223400	4	NMDS2	SNP_2_60223445	60223445	4.98076e-07	0.0633286	FarmCPU	0.0702494	0.435484	1
2	60223400	4	NMDS2	SNP_2_60223445	60223445	3.52371e-07	0.063	ISIS EM-BLASSO	NA	0.4355	1
2	60223400	4	NMDS2	SNP_2_60223445	60223445	9.85372e-07	0.037	ISIS EM-BLASSO	NA	0.4355	ave
2	60764400	3	LjRoot226	SNP_2_60764403	60764403	4.93654e-09	5.88673	FarmCPU	0.00417752	0.0709677	1
2	60764400	3	LjRoot226	SNP_2_60764403	60764403	8.20821e-07	2.35437	FarmCPU	0.138924	0.0709677	ave
2	60764400	3	LjRoot226	SNP_2_60764403	60764403	1.0197e-09	11.8848	Gemma	0.000215731	0.071	1
2	60764400	3	LjRoot226	SNP_2_60764403	60764403	2.65731e-07	4.66989	Gemma	0.00907275	0.071	ave
2	60769700	5	LjRoot226	SNP_2_60769736	60769736	1.0197e-09	11.8848	Gemma	0.000215731	0.071	1
2	60769700	5	LjRoot226	SNP_2_60769736	60769736	2.65731e-07	4.66989	Gemma	0.00907275	0.071	ave
2	60769700	5	Pseudomonadaceae	SNP_2_60769737	60769737	1.5838e-07	0.9764	ISIS EM-BLASSO	NA	0.2258	ave
2	60769700	5	Pseudomonadaceae	SNP_2_60769737	60769737	7.87408e-09	1.8838	ISIS EM-BLASSO	NA	0.2258	2
2	71613300	3	d125db2116b8b1ff5b6bd9f62a1aa0e0	SNP_2_71613279	71613279	3.37974e-07	29.8552	Gemma	0.01217	0.052	1
2	71613300	3	d125db2116b8b1ff5b6bd9f62a1aa0e0	SNP_2_71613337	71613337	8.3253e-09	7.0245	ISIS EM-BLASSO	NA	0.0677	ave
2	72288400	3	LjRoot104	SNP_2_72288422	72288422	1.081e-07	9.19309	Gemma	0.00338814	0.058	2
2	72288400	3	LjRoot104	SNP_2_72288422	72288422	6.42179e-07	4.27345	Gemma	0.0483093	0.058	ave
2	72303900	3	LjRoot104	SNP_2_72303866	72303866	1.081e-07	9.19309	Gemma	0.00338814	0.058	2
2	72303900	3	LjRoot104	SNP_2_72303866	72303866	6.42179e-07	4.27345	Gemma	0.0483093	0.058	ave
2	76975000	3	LjRoot226	SNP_2_76975033	76975033	1.88541e-07	13.0356	Gemma	0.00489884	0.061	1
2	76975000	3	LjRoot226	SNP_2_76975033	76975033	8.94952e-08	6.04444	Gemma	0.00561066	0.061	ave
2	78606900	12	Burkholderiaceae	SNP_2_78606912	78606912	2.00689e-08	2.77004	FarmCPU	0.00566112	0.13871	2
2	78606900	12	Burkholderiaceae	SNP_2_78606912	78606912	3.76316e-07	4.611	Gemma	0.140421	0.139	2
2	78606900	12	LjRoot223	SNP_2_78606912	78606912	2.48345e-10	46.5061	FarmCPU	0.000105081	0.13871	2
2	78606900	12	LjRoot223	SNP_2_78606912	78606912	7.65646e-07	77.115	Gemma	0.323965	0.139	2
2	78606900	12	LjRoot223	SNP_2_78606912	78606912	2.6729e-07	68.1233	Gemma	0.0294684	0.139	ave
2	78606900	12	LjRoot282	SNP_2_78606912	78606912	9.15392e-18	40.2516	FarmCPU	7.74652e-12	0.13871	2
2	78606900	12	LjRoot282	SNP_2_78606912	78606912	5.51188e-08	29.5597	ISIS EM-BLASSO	NA	0.1387	2
2	78606900	12	LjRoot282	SNP_2_78606912	78606912	1.11019e-08	55.9997	Gemma	0.00939501	0.139	2
2	78606900	12	LjRoot289	SNP_2_78606912	78606912	4.08261e-14	9.07988	FarmCPU	3.45489e-08	0.13871	2
2	78606900	12	LjRoot289	SNP_2_78606912	78606912	1.76116e-09	7.1713	ISIS EM-BLASSO	NA	0.1387	2
2	78606900	12	LjRoot289	SNP_2_78606912	78606912	7.45029e-09	13.3263	Gemma	0.00630483	0.139	2
2	78606900	12	LjRoot3	SNP_2_78606912	78606912	1.72158e-11	3.36265	FarmCPU	1.45687e-05	0.13871	2
2	78606900	12	LjRoot3	SNP_2_78606912	78606912	3.86446e-17	2.31721	FarmCPU	3.27031e-11	0.13871	ave
2	78606900	12	LjRoot3	SNP_2_78606912	78606912	1.34741e-17	2.7049	ISIS EM-BLASSO	NA	0.1387	ave
2	78606900	12	LjRoot3	SNP_2_78606912	78606912	1.13397e-08	5.66536	Gemma	0.00959622	0.139	2
2	78606900	12	LjRoot3	SNP_2_78606912	78606912	2.79089e-11	3.6874	Gemma	2.3618e-05	0.139	ave
2	78606900	12	LjRoot82	SNP_2_78606912	78606912	9.58561e-08	21.7534	FarmCPU	0.0162237	0.13871	2
2	78606900	12	LjRoot82	SNP_2_78606912	78606912	7.15352e-08	46.843	Gemma	0.0605369	0.139	2
2	78606900	12	MDS1	SNP_2_78606912	78606912	2.1937e-16	-0.127199	FarmCPU	9.2821e-11	0.13871	2
2	78606900	12	MDS1	SNP_2_78606912	78606912	1.99968e-10	-0.0512756	FarmCPU	5.64076e-05	0.13871	2
2	78606900	12	MDS1	SNP_2_78606912	78606912	5.71759e-09	-0.0891606	Gemma	0.00483853	0.139	2
2	78606900	12	MDS1	SNP_2_78606912	78606912	4.97508e-07	-0.0345055	Gemma	0.0102687	0.139	ave
2	78606900	12	NMDS1	SNP_2_78606912	78606912	2.1937e-16	-0.127199	FarmCPU	9.2821e-11	0.13871	2
2	78606900	12	NMDS1	SNP_2_78606912	78606912	1.1403e-07	-0.186087	Gemma	0.00195029	0.139	2
2	78606900	12	Pseudomonadaceae	SNP_2_78606912	78606912	2.5171e-13	-1.7487	ISIS EM-BLASSO	NA	0.1387	ave
2	78606900	12	Pseudomonadaceae	SNP_2_78606912	78606912	7.07316e-07	-2.46649	Gemma	0.072443	0.139	ave
2	78606900	12	pca1	SNP_2_78606912	78606912	3.94029e-18	-2.07284	FarmCPU	1.66723e-12	0.13871	2
2	78606900	12	pca1	SNP_2_78606912	78606912	4.28155e-19	-1.23783	FarmCPU	1.81163e-13	0.13871	ave
2	78606900	12	pca1	SNP_2_78606912	78606912	6.02005e-17	-1.9417	ISIS EM-BLASSO	NA	0.1387	2
2	78606900	12	pca1	SNP_2_78606912	78606912	1.08218e-12	-1.1445	ISIS EM-BLASSO	NA	0.1387	ave
2	78606900	12	pca1	SNP_2_78606912	78606912	1.63423e-10	-2.78603	Gemma	0.000138298	0.139	2
2	78606900	12	pca1	SNP_2_78606912	78606912	2.05762e-08	-1.71049	Gemma	0.000458229	0.139	ave
2	78609800	3	Caulobacteraceae	SNP_2_78609830	78609830	2.83165e-08	0.421892	FarmCPU	0.00798765	0.0741935	ave
2	78609800	3	Caulobacteraceae	SNP_2_78609830	78609830	3.38227e-08	0.85441	FarmCPU	0.00477041	0.0741935	1
2	78609800	3	Caulobacteraceae	SNP_2_78609830	78609830	9.49074e-09	1.0119	ISIS EM-BLASSO	NA	0.0742	1
2	78609800	3	Caulobacteraceae	SNP_2_78609830	78609830	1.68543e-10	1.72643	Gemma	0.00014263	0.074	1
2	78609800	3	Caulobacteraceae	SNP_2_78609830	78609830	4.58995e-07	0.634691	Gemma	0.0779526	0.074	ave
2	80834500	3	Rhizobiaceae	SNP_2_80834479	80834479	8.57038e-12	-0.7815	ISIS EM-BLASSO	NA	0.0903	ave
2	80834500	3	Rhizobiaceae	SNP_2_80834479	80834479	1.14051e-09	-1.4486	ISIS EM-BLASSO	NA	0.0903	2
2	88711700	3	pca1	SNP_2_88711695	88711695	7.54776e-07	-1.81907	Gemma	0.00565591	0.09	ave
2	88711700	3	pca1	SNP_2_88711745	88711745	8.48017e-07	-2.55188	Gemma	0.0361634	0.094	2
2	88711700	3	pca1	SNP_2_88711745	88711745	3.63385e-07	-1.81866	Gemma	0.00341684	0.094	ave
2	88711800	3	pca1	SNP_2_88711782	88711782	8.48017e-07	-2.55188	Gemma	0.0361634	0.094	2
2	88711800	3	pca1	SNP_2_88711782	88711782	3.63385e-07	-1.81866	Gemma	0.00341684	0.094	ave
2	88712300	5	Burkholderiaceae	SNP_2_88712296	88712296	8.55174e-07	3.11673	Gemma	0.0462079	0.094	ave
2	88712300	5	Burkholderiaceae	SNP_2_88712319	88712319	9.05364e-10	1.83632	FarmCPU	0.000153233	0.0903226	ave
2	88712300	5	Burkholderiaceae	SNP_2_88712319	88712319	2.10814e-07	1.8186	ISIS EM-BLASSO	NA	0.0903	ave
2	88712300	5	Burkholderiaceae	SNP_2_88712319	88712319	2.0978e-07	3.23094	Gemma	0.0312588	0.09	ave
2	88712300	5	NMDS1	SNP_2_88712296	88712296	6.10783e-07	-0.203227	Gemma	0.00496997	0.094	2
2	88712300	5	NMDS1	SNP_2_88712319	88712319	4.73799e-07	-0.202128	Gemma	0.00413354	0.09	2
2	88712300	5	pca1	SNP_2_88712296	88712296	8.48017e-07	-2.55188	Gemma	0.0361634	0.094	2
2	88712300	5	pca1	SNP_2_88712296	88712296	3.63385e-07	-1.81866	Gemma	0.00341684	0.094	ave
2	88712300	5	pca1	SNP_2_88712319	88712319	9.13692e-09	-1.1178	ISIS EM-BLASSO	NA	0.0903	ave
2	88712300	5	pca1	SNP_2_88712319	88712319	3.24181e-07	-2.60607	Gemma	0.0336159	0.09	2
2	88712300	5	pca1	SNP_2_88712319	88712319	1.6621e-07	-1.84248	Gemma	0.00195355	0.09	ave
3	19331200	3	LjRoot104	SNP_3_19331153	19331153	4.21203e-13	7.75813	FarmCPU	3.56444e-07	0.0548387	2
3	19331200	3	LjRoot104	SNP_3_19331153	19331153	3.86228e-10	10.529	Gemma	0.00028475	0.055	2
3	19331200	3	LjRoot104	SNP_3_19331153	19331153	5.33899e-07	3.94518	Gemma	0.0483093	0.055	ave
3	39021100	8	LjRoot279	SNP_3_39021078	39021078	6.49834e-08	8.13748	Gemma	0.0274962	0.129	3
3	39021100	8	LjRoot279	SNP_3_39021079	39021079	6.49834e-08	8.13748	Gemma	0.0274962	0.129	3
3	39021100	8	LjRoot282	SNP_3_39021078	39021078	6.99039e-07	38.4058	Gemma	0.016949	0.129	3
3	39021100	8	LjRoot282	SNP_3_39021079	39021079	6.99039e-07	38.4058	Gemma	0.016949	0.129	3
3	39021100	8	Weeksellaceae	SNP_3_39021078	39021078	1.33581e-09	0.101359	FarmCPU	0.00113042	0.129032	2
3	39021100	8	Weeksellaceae	SNP_3_39021078	39021078	5.7497e-09	0.189976	Gemma	0.0016219	0.129	2
3	39021100	8	Weeksellaceae	SNP_3_39021079	39021079	5.7497e-09	0.189976	Gemma	0.0016219	0.129	2
3	39021100	8	pca1	SNP_3_39021078	39021078	5.46798e-08	2.07318	Gemma	0.0115682	0.129	3
3	39021100	8	pca1	SNP_3_39021079	39021079	5.46798e-08	2.07318	Gemma	0.0115682	0.129	3
3	39021100	8	pca2	SNP_3_39021078	39021078	8.8246e-07	1.70207	Gemma	0.106683	0.129	1
3	39021100	8	pca2	SNP_3_39021079	39021079	8.8246e-07	1.70207	Gemma	0.106683	0.129	1
3	85862900	3	LjRoot104	SNP_3_85862914	85862914	1.19484e-08	9.10092	Gemma	0.00144449	0.065	2
3	85862900	3	LjRoot104	SNP_3_85862914	85862914	7.40003e-07	3.80319	Gemma	0.0483093	0.065	ave
3	85866900	5	LjRoot104	SNP_3_85866890	85866890	2.43488e-08	6.07281	FarmCPU	0.0034342	0.0612903	2
3	85866900	5	LjRoot104	SNP_3_85866890	85866890	1.01661e-08	9.53839	Gemma	0.00143386	0.061	2
3	85866900	5	LjRoot104	SNP_3_85866890	85866890	7.57845e-07	3.97088	Gemma	0.0483093	0.061	ave
3	85866900	5	LjRoot18	SNP_3_85866890	85866890	9.56497e-12	8.37473	FarmCPU	8.09436e-06	0.0612903	2
3	85866900	5	LjRoot18	SNP_3_85866890	85866890	4.12176e-07	12.7187	Gemma	0.0181434	0.061	2
3	85866900	5	Rhodanobacteraceae	SNP_3_85866890	85866890	5.35264e-08	0.17918	FarmCPU	0.00754945	0.0612903	2
3	85866900	5	Rhodanobacteraceae	SNP_3_85866890	85866890	4.59911e-08	0.382132	Gemma	0.0129944	0.061	2
3	85875700	3	LjRoot104	SNP_3_85875726	85875726	1.01661e-08	9.53839	Gemma	0.00143386	0.061	2
3	85875700	3	LjRoot104	SNP_3_85875726	85875726	7.57845e-07	3.97088	Gemma	0.0483093	0.061	ave
3	93926500	3	LjRoot196	SNP_3_93926477	93926477	3.2148e-10	10.3148	FarmCPU	9.06844e-05	0.0516129	ave
3	93926500	3	LjRoot196	SNP_3_93926477	93926477	9.75439e-11	11.9349	ISIS EM-BLASSO	NA	0.0516	ave
3	93926500	3	LjRoot196	SNP_3_93926477	93926477	4.45555e-08	20.2231	Gemma	0.0031421	0.052	3
3	93926500	3	LjRoot196	SNP_3_93926477	93926477	1.67999e-10	18.7272	Gemma	0.00014217	0.052	ave
4	7390800	3	LjRoot282	SNP_4_7390803	7390803	2.86259e-07	117.773	Gemma	0.0217021	0.055	1
4	7390800	3	LjRoot282	SNP_4_7390803	7390803	3.18403e-08	57.3725	Gemma	0.00225111	0.055	ave
4	7398800	3	LjRoot282	SNP_4_7398783	7398783	5.22635e-07	115.242	Gemma	0.0217021	0.058	1
4	7398800	3	LjRoot282	SNP_4_7398783	7398783	4.10355e-08	57.4085	Gemma	0.00248046	0.058	ave
4	8868900	3	LjRoot282	SNP_4_8868851	8868851	5.65351e-07	109.387	Gemma	0.0217021	0.065	1
4	8868900	3	LjRoot282	SNP_4_8868851	8868851	1.80119e-08	53.2394	Gemma	0.00189781	0.065	ave
4	8869100	3	LjRoot282	SNP_4_8869067	8869067	5.65351e-07	109.387	Gemma	0.0217021	0.065	1
4	8869100	3	LjRoot282	SNP_4_8869067	8869067	1.80119e-08	53.2394	Gemma	0.00189781	0.065	ave
4	8878800	3	LjRoot282	SNP_4_8878785	8878785	5.65351e-07	109.387	Gemma	0.0217021	0.065	1
4	8878800	3	LjRoot282	SNP_4_8878785	8878785	1.80119e-08	53.2394	Gemma	0.00189781	0.065	ave
4	8977200	3	LjRoot282	SNP_4_8977245	8977245	1.13114e-07	111.826	Gemma	0.0217021	0.065	1
4	8977200	3	LjRoot282	SNP_4_8977245	8977245	3.19212e-08	52.345	Gemma	0.00225111	0.065	ave
4	27184100	6	Beijerinckiaceae	SNP_4_27184097	27184097	3.26375e-07	0.358918	Gemma	0.00264358	0.058	1
4	27184100	6	Beijerinckiaceae	SNP_4_27184099	27184099	9.3673e-08	0.380605	Gemma	0.00116566	0.055	1
4	27184100	6	Beijerinckiaceae	SNP_4_27184105	27184105	9.3673e-08	0.380605	Gemma	0.00116566	0.055	1
4	27184100	6	Beijerinckiaceae	SNP_4_27184108	27184108	4.44821e-08	0.40716	Gemma	0.000710247	0.052	1
4	27184100	6	Beijerinckiaceae	SNP_4_27184116	27184116	8.50469e-09	0.430085	Gemma	0.000234197	0.052	1
4	27184100	6	Beijerinckiaceae	SNP_4_27184117	27184117	8.50469e-09	0.430085	Gemma	0.000234197	0.052	1
4	27184100	6	Beijerinckiaceae	SNP_4_27184120	27184120	8.50469e-09	0.430085	Gemma	0.000234197	0.052	1
4	27184100	6	Beijerinckiaceae	SNP_4_27184121	27184121	8.50469e-09	0.430085	Gemma	0.000234197	0.052	1
4	27184100	6	LjRoot226	SNP_4_27184065	27184065	4.85065e-07	6.9175	ISIS EM-BLASSO	NA	0.0742	1
4	27184100	6	LjRoot226	SNP_4_27184065	27184065	3.01536e-07	9.83044	Gemma	0.00588812	0.074	1
4	27184100	6	LjRoot226	SNP_4_27184065	27184065	8.27591e-08	4.79059	Gemma	0.00561066	0.074	ave
4	27184100	6	MDS1	SNP_4_27184083	27184083	1.39047e-07	-0.0406998	Gemma	0.00441583	0.077	ave
4	27184100	6	MDS1	SNP_4_27184097	27184097	3.54007e-08	-0.0444589	Gemma	0.00272345	0.058	ave
4	27184100	6	MDS1	SNP_4_27184099	27184099	3.16155e-08	-0.0454461	Gemma	0.00272345	0.055	ave
4	27184100	6	MDS1	SNP_4_27184105	27184105	3.16155e-08	-0.0454461	Gemma	0.00272345	0.055	ave
4	27184100	6	MDS1	SNP_4_27184108	27184108	3.76918e-07	-0.0434371	Gemma	0.00911336	0.052	ave
4	27184100	6	MDS1	SNP_4_27184116	27184116	6.49906e-08	-0.0466575	Gemma	0.0033344	0.052	ave
4	27184100	6	MDS1	SNP_4_27184117	27184117	6.49906e-08	-0.0466575	Gemma	0.0033344	0.052	ave
4	27184100	6	MDS1	SNP_4_27184120	27184120	6.49906e-08	-0.0466575	Gemma	0.0033344	0.052	ave
4	27184100	6	MDS1	SNP_4_27184121	27184121	6.49906e-08	-0.0466575	Gemma	0.0033344	0.052	ave
4	27184100	6	pca1	SNP_4_27184097	27184097	3.38326e-07	-1.93176	Gemma	0.0033079	0.058	ave
4	27184100	6	pca1	SNP_4_27184099	27184099	8.71443e-08	-2.04569	Gemma	0.00129379	0.055	ave
4	27184100	6	pca1	SNP_4_27184105	27184105	8.71443e-08	-2.04569	Gemma	0.00129379	0.055	ave
4	27184100	6	pca1	SNP_4_27184108	27184108	2.76273e-07	-2.03646	Gemma	0.00290383	0.052	ave
4	27184100	6	pca1	SNP_4_27184116	27184116	1.80621e-08	-2.22468	Gemma	0.000413111	0.052	ave
4	27184100	6	pca1	SNP_4_27184117	27184117	1.80621e-08	-2.22468	Gemma	0.000413111	0.052	ave
4	27184100	6	pca1	SNP_4_27184120	27184120	1.80621e-08	-2.22468	Gemma	0.000413111	0.052	ave
4	27184100	6	pca1	SNP_4_27184121	27184121	1.80621e-08	-2.22468	Gemma	0.000413111	0.052	ave
4	44673000	3	LjRoot226	SNP_4_44673044	44673044	2.61488e-08	-12.9363	Gemma	0.00158061	0.058	1
4	44673000	3	LjRoot226	SNP_4_44673044	44673044	4.87137e-07	-5.4095	Gemma	0.0121565	0.058	ave
4	44687200	3	LjRoot226	SNP_4_44687234	44687234	1.06607e-07	-12.3032	Gemma	0.00474825	0.061	1
4	44687200	3	LjRoot226	SNP_4_44687234	44687234	4.70289e-07	-5.38322	Gemma	0.0121565	0.061	ave
4	67480600	4	LjRoot104	SNP_4_67480590	67480590	1.37159e-09	10.4885	Gemma	0.000386905	0.055	2
4	67480600	4	LjRoot104	SNP_4_67480590	67480590	4.2903e-08	4.55567	Gemma	0.0181534	0.055	ave
4	67480600	4	pca2	SNP_4_67480590	67480590	7.66479e-09	1.6497	ISIS EM-BLASSO	NA	0.0548	2
4	67480600	4	pca2	SNP_4_67480590	67480590	6.20635e-07	2.70768	Gemma	0.266539	0.055	2
4	67482900	3	LjRoot104	SNP_4_67482860	67482860	4.13551e-09	6.41867	FarmCPU	0.000699938	0.0645161	2
4	67482900	3	LjRoot104	SNP_4_67482860	67482860	6.51437e-12	3.7609	FarmCPU	5.51281e-06	0.0645161	ave
4	67482900	3	LjRoot104	SNP_4_67482860	67482860	2.13796e-08	7.0291	ISIS EM-BLASSO	NA	0.0645	2
4	67482900	3	LjRoot104	SNP_4_67482860	67482860	2.30144e-08	2.6878	ISIS EM-BLASSO	NA	0.0645	ave
4	67482900	3	LjRoot104	SNP_4_67482860	67482860	6.72967e-10	10.0441	Gemma	0.00028475	0.065	2
4	67482900	3	LjRoot104	SNP_4_67482860	67482860	6.09998e-09	4.50898	Gemma	0.00516212	0.065	ave
4	67814500	3	LjRoot226	SNP_4_67814460	67814460	6.89413e-07	11.9431	Gemma	0.00845533	0.061	1
4	67814500	3	LjRoot226	SNP_4_67814460	67814460	7.05346e-07	5.44765	Gemma	0.0153052	0.061	ave
4	68168600	3	LjRoot226	SNP_4_68168624	68168624	3.89577e-08	2.72657	FarmCPU	0.016484	0.0548387	ave
4	68168600	3	LjRoot226	SNP_4_68168624	68168624	6.38063e-07	11.7885	Gemma	0.00794062	0.055	1
4	68168600	3	LjRoot226	SNP_4_68168624	68168624	2.89469e-07	5.55611	Gemma	0.00907275	0.055	ave
5	51713800	3	LjRoot54	SNP_5_51713823	51713823	8.04435e-07	24.387	FarmCPU	0.113458	0.0580645	ave
5	51713800	3	LjRoot54	SNP_5_51713823	51713823	7.38807e-07	114.18	Gemma	0.0534907	0.058	1
5	61327000	7	Beijerinckiaceae	SNP_5_61327002	61327002	1.64605e-07	0.378779	Gemma	0.0017971	0.074	1
5	61327000	7	Beijerinckiaceae	SNP_5_61327003	61327003	2.43386e-07	0.370538	Gemma	0.00234243	0.077	1
5	61327000	7	Beijerinckiaceae	SNP_5_61327012	61327012	1.15071e-08	0.457229	Gemma	0.000286408	0.061	1
5	61327000	7	Beijerinckiaceae	SNP_5_61327022	61327022	1.91665e-08	0.41572	Gemma	0.000374638	0.068	1
5	61327000	7	Beijerinckiaceae	SNP_5_61327028	61327028	1.91665e-08	0.41572	Gemma	0.000374638	0.068	1
5	61327000	7	Beijerinckiaceae	SNP_5_61327037	61327037	1.91665e-08	0.41572	Gemma	0.000374638	0.068	1
5	61327000	7	Beijerinckiaceae	SNP_5_61327043	61327043	1.91665e-08	0.41572	Gemma	0.000374638	0.068	1
5	61327000	7	LjRoot243	SNP_5_61327002	61327002	2.63809e-07	3.77449	Gemma	0.00246096	0.074	1
5	61327000	7	LjRoot243	SNP_5_61327012	61327012	1.09856e-08	4.69532	Gemma	0.000281714	0.061	1
5	61327000	7	LjRoot243	SNP_5_61327022	61327022	2.6312e-08	4.14632	Gemma	0.000449675	0.068	1
5	61327000	7	LjRoot243	SNP_5_61327028	61327028	2.6312e-08	4.14632	Gemma	0.000449675	0.068	1
5	61327000	7	LjRoot243	SNP_5_61327037	61327037	2.6312e-08	4.14632	Gemma	0.000449675	0.068	1
5	61327000	7	LjRoot243	SNP_5_61327043	61327043	2.6312e-08	4.14632	Gemma	0.000449675	0.068	1
5	61327000	7	LjRoot282	SNP_5_61327002	61327002	4.53122e-07	-51.9122	Gemma	0.016949	0.074	3
5	61327000	7	LjRoot282	SNP_5_61327012	61327012	7.74736e-07	-55.69	Gemma	0.016949	0.061	3
5	61327000	7	LjRoot282	SNP_5_61327022	61327022	7.7757e-07	-53.1713	Gemma	0.016949	0.068	3
5	61327000	7	LjRoot282	SNP_5_61327028	61327028	7.7757e-07	-53.1713	Gemma	0.016949	0.068	3
5	61327000	7	LjRoot282	SNP_5_61327037	61327037	7.7757e-07	-53.1713	Gemma	0.016949	0.068	3
5	61327000	7	LjRoot282	SNP_5_61327043	61327043	7.7757e-07	-53.1713	Gemma	0.016949	0.068	3
5	61327000	7	pca1	SNP_5_61327012	61327012	8.04207e-07	-2.43175	Gemma	0.00575106	0.061	ave
5	61327000	7	pca1	SNP_5_61327022	61327022	8.15509e-07	-2.34513	Gemma	0.00575106	0.068	ave
5	61327000	7	pca1	SNP_5_61327028	61327028	8.15509e-07	-2.34513	Gemma	0.00575106	0.068	ave
5	61327000	7	pca1	SNP_5_61327037	61327037	8.15509e-07	-2.34513	Gemma	0.00575106	0.068	ave
5	61327000	7	pca1	SNP_5_61327043	61327043	8.15509e-07	-2.34513	Gemma	0.00575106	0.068	ave
6	2641400	3	LjRoot226	SNP_6_2641364	2641364	3.17158e-07	12.9087	Gemma	0.00588812	0.058	1
6	2641400	3	LjRoot226	SNP_6_2641364	2641364	7.78737e-07	5.64036	Gemma	0.0160734	0.058	ave
6	4960600	3	MDS1	SNP_6_4960645	4960645	4.72624e-07	-0.0429141	Gemma	0.00999898	0.068	ave
6	4960600	3	MDS1	SNP_6_4960648	4960648	4.72624e-07	-0.0429141	Gemma	0.00999898	0.068	ave
6	4960600	3	pca1	SNP_6_4960645	4960645	6.74746e-07	-1.98169	Gemma	0.00519096	0.068	ave
6	4960600	3	pca1	SNP_6_4960648	4960648	6.74746e-07	-1.98169	Gemma	0.00519096	0.068	ave
6	4960700	9	LjRoot243	SNP_6_4960656	4960656	2.15943e-07	4.0775	Gemma	0.00222856	0.055	1
6	4960700	9	LjRoot243	SNP_6_4960661	4960661	2.15943e-07	4.0775	Gemma	0.00222856	0.055	1
6	4960700	9	LjRoot243	SNP_6_4960662	4960662	2.15943e-07	4.0775	Gemma	0.00222856	0.055	1
6	4960700	9	LjRoot243	SNP_6_4960672	4960672	2.15943e-07	4.0775	Gemma	0.00222856	0.055	1
6	4960700	9	LjRoot282	SNP_6_4960656	4960656	6.13913e-07	-47.9339	Gemma	0.016949	0.055	3
6	4960700	9	LjRoot282	SNP_6_4960661	4960661	6.13913e-07	-47.9339	Gemma	0.016949	0.055	3
6	4960700	9	LjRoot282	SNP_6_4960662	4960662	6.13913e-07	-47.9339	Gemma	0.016949	0.055	3
6	4960700	9	LjRoot282	SNP_6_4960672	4960672	6.13913e-07	-47.9339	Gemma	0.016949	0.055	3
6	4960700	9	MDS1	SNP_6_4960656	4960656	2.92529e-08	-0.0483408	Gemma	0.00272345	0.055	ave
6	4960700	9	MDS1	SNP_6_4960661	4960661	2.92529e-08	-0.0483408	Gemma	0.00272345	0.055	ave
6	4960700	9	MDS1	SNP_6_4960662	4960662	2.92529e-08	-0.0483408	Gemma	0.00272345	0.055	ave
6	4960700	9	MDS1	SNP_6_4960672	4960672	2.92529e-08	-0.0483408	Gemma	0.00272345	0.055	ave
6	4960700	9	Sphingomonadaceae	SNP_6_4960656	4960656	1.9095e-07	0.244878	Gemma	0.00325275	0.055	ave
6	4960700	9	Sphingomonadaceae	SNP_6_4960661	4960661	1.9095e-07	0.244878	Gemma	0.00325275	0.055	ave
6	4960700	9	Sphingomonadaceae	SNP_6_4960662	4960662	1.9095e-07	0.244878	Gemma	0.00325275	0.055	ave
6	4960700	9	Sphingomonadaceae	SNP_6_4960672	4960672	1.9095e-07	0.244878	Gemma	0.00325275	0.055	ave
6	4960700	9	pca1	SNP_6_4960656	4960656	5.14579e-07	-3.01151	Gemma	0.0336159	0.055	2
6	4960700	9	pca1	SNP_6_4960656	4960656	1.3188e-10	-2.47783	Gemma	1.39504e-05	0.055	ave
6	4960700	9	pca1	SNP_6_4960661	4960661	5.14579e-07	-3.01151	Gemma	0.0336159	0.055	2
6	4960700	9	pca1	SNP_6_4960661	4960661	1.3188e-10	-2.47783	Gemma	1.39504e-05	0.055	ave
6	4960700	9	pca1	SNP_6_4960662	4960662	5.14579e-07	-3.01151	Gemma	0.0336159	0.055	2
6	4960700	9	pca1	SNP_6_4960662	4960662	1.3188e-10	-2.47783	Gemma	1.39504e-05	0.055	ave
6	4960700	9	pca1	SNP_6_4960672	4960672	5.14579e-07	-3.01151	Gemma	0.0336159	0.055	2
6	4960700	9	pca1	SNP_6_4960672	4960672	1.3188e-10	-2.47783	Gemma	1.39504e-05	0.055	ave
6	48551600	3	LjRoot226	SNP_6_48551573	48551573	8.89906e-07	5.00502	FarmCPU	0.188269	0.0516129	1
6	48551600	3	LjRoot226	SNP_6_48551573	48551573	2.33979e-08	14.0142	Gemma	0.00158061	0.052	1
6	48551600	3	LjRoot226	SNP_6_48551573	48551573	5.04506e-07	5.78954	Gemma	0.0121565	0.052	ave
6	54789100	3	Burkholderiaceae	SNP_6_54789135	54789135	1.86323e-09	-4.56735	Gemma	0.000788382	0.055	3
6	54789100	3	Burkholderiaceae	SNP_6_54789135	54789135	5.64375e-07	-4.02276	Gemma	0.0462079	0.055	ave
6	58513700	3	LjRoot20	SNP_6_58513654	58513654	1.22518e-07	73.129	ISIS EM-BLASSO	NA	0.0613	1
6	58513700	3	LjRoot20	SNP_6_58513654	58513654	1.16386e-12	43.581	ISIS EM-BLASSO	NA	0.0613	ave
6	58513700	3	LjRoot20	SNP_6_58513654	58513654	2.24682e-07	53.0353	Gemma	0.0475344	0.061	ave
6	58520000	3	LjRoot20	SNP_6_58520027	58520027	2.10914e-07	78.3867	FarmCPU	0.0223107	0.0548387	1
6	58520000	3	LjRoot20	SNP_6_58520027	58520027	5.21206e-14	47.8558	FarmCPU	4.41069e-08	0.0548387	ave
6	58520000	3	LjRoot20	SNP_6_58520027	58520027	4.66852e-08	59.1853	Gemma	0.0197537	0.055	ave

## Sheet: ROOMIE1 results
SNP	Chromosome	Position	P.value	effect	Method	MAF	Trait	Trial
SNP_2_78606912	2	78.6069	2.48345e-10	46.5061	FarmCPU	0.13871	LjRoot223	2
SNP_2_78606912	2	78.6069	9.15392e-18	40.2516	FarmCPU	0.13871	LjRoot282	2
SNP_2_78606912	2	78.6069	4.08261e-14	9.07988	FarmCPU	0.13871	LjRoot289	2
SNP_2_78606912	2	78.6069	1.72158e-11	3.36265	FarmCPU	0.13871	LjRoot3	2
SNP_2_78606912	2	78.6069	9.58561e-08	21.7534	FarmCPU	0.13871	LjRoot82	2
SNP_2_78606912	2	78.6069	3.86446e-17	2.31721	FarmCPU	0.13871	LjRoot3	ave
SNP_2_78606912	2	78.6069	2.1937e-16	-0.127199	FarmCPU	0.13871	MDS1	2
SNP_2_78606912	2	78.6069	1.99968e-10	-0.0512756	FarmCPU	0.13871	MDS1	2
SNP_2_78606912	2	78.6069	2.1937e-16	-0.127199	FarmCPU	0.13871	NMDS1	2
SNP_2_78606912	2	78.6069	3.94029e-18	-2.07284	FarmCPU	0.13871	pca1	2
SNP_2_78606912	2	78.6069	4.28155e-19	-1.23783	FarmCPU	0.13871	pca1	ave
SNP_2_78606912	2	78.6069	2.00689e-08	2.77004	FarmCPU	0.13871	Burkholderiaceae	2
SNP_2_78606912	2	78.6069	5.51188e-08	29.5597	ISIS EM-BLASSO	0.1387	LjRoot282	2
SNP_2_78606912	2	78.6069	1.76116e-09	7.1713	ISIS EM-BLASSO	0.1387	LjRoot289	2
SNP_2_78606912	2	78.6069	1.34741e-17	2.7049	ISIS EM-BLASSO	0.1387	LjRoot3	ave
SNP_2_78606912	2	78.6069	6.02005e-17	-1.9417	ISIS EM-BLASSO	0.1387	pca1	2
SNP_2_78606912	2	78.6069	1.08218e-12	-1.1445	ISIS EM-BLASSO	0.1387	pca1	ave
SNP_2_78606912	2	78.6069	2.5171e-13	-1.7487	ISIS EM-BLASSO	0.1387	Pseudomonadaceae	ave
SNP_2_78606912	2	78.6069	3.76316e-07	4.611	Gemma	0.139	Burkholderiaceae	2
SNP_2_78606912	2	78.6069	7.65646e-07	77.115	Gemma	0.139	LjRoot223	2
SNP_2_78606912	2	78.6069	2.6729e-07	68.1233	Gemma	0.139	LjRoot223	ave
SNP_2_78606912	2	78.6069	1.11019e-08	55.9997	Gemma	0.139	LjRoot282	2
SNP_2_78606912	2	78.6069	7.45029e-09	13.3263	Gemma	0.139	LjRoot289	2
SNP_2_78606912	2	78.6069	1.13397e-08	5.66536	Gemma	0.139	LjRoot3	2
SNP_2_78606912	2	78.6069	2.79089e-11	3.6874	Gemma	0.139	LjRoot3	ave
SNP_2_78606912	2	78.6069	7.15352e-08	46.843	Gemma	0.139	LjRoot82	2
SNP_2_78606912	2	78.6069	5.71759e-09	-0.0891606	Gemma	0.139	MDS1	2
SNP_2_78606912	2	78.6069	4.97508e-07	-0.0345055	Gemma	0.139	MDS1	ave
SNP_2_78606912	2	78.6069	1.1403e-07	-0.186087	Gemma	0.139	NMDS1	2
SNP_2_78606912	2	78.6069	7.07316e-07	-2.46649	Gemma	0.139	Pseudomonadaceae	ave
SNP_2_78606912	2	78.6069	1.63423e-10	-2.78603	Gemma	0.139	pca1	2
SNP_2_78606912	2	78.6069	2.05762e-08	-1.71049	Gemma	0.139	pca1	ave
SNP_2_78609830	2	78.6098	2.83165e-08	0.421892	FarmCPU	0.0741935	Caulobacteraceae	ave
SNP_2_78609830	2	78.6098	3.38227e-08	0.85441	FarmCPU	0.0741935	Caulobacteraceae	1
SNP_2_78609830	2	78.6098	9.49074e-09	1.0119	ISIS EM-BLASSO	0.0742	Caulobacteraceae	1
SNP_2_78609830	2	78.6098	1.68543e-10	1.72643	Gemma	0.074	Caulobacteraceae	1
SNP_2_78609830	2	78.6098	4.58995e-07	0.634691	Gemma	0.074	Caulobacteraceae	ave

## Sheet: NLRs
Chromosome	Genename	Type	Start	End	Stand	Motifs
1	NC_080041.1_nlr1	TIR-NBARC-LRR	2074219	2078037	+	motif_18,motif_15,motif_13,motif_1,motif_4,motif_4,motif_5,motif_5,motif_5,motif_10,motif_10,motif_10,motif_3,motif_3,motif_12,motif_7,motif_11,motif_11,motif_11,motif_11,motif_11,motif_9,motif_11,motif_11,motif_11,motif_9,motif_11,motif_11,motif_9,motif_11,motif_11
1	NC_080041.1_nlr2	TIR-NBARC-LRR	2079625	2083436	+	motif_18,motif_15,motif_13,motif_1,motif_4,motif_4,motif_5,motif_5,motif_5,motif_10,motif_10,motif_10,motif_3,motif_3,motif_12,motif_7,motif_11,motif_11,motif_11,motif_11,motif_11,motif_9,motif_11,motif_11,motif_11,motif_9,motif_11,motif_11,motif_9,motif_11,motif_11
1	NC_080041.1_nlr3	TIR	4033108	4033471	+	motif_18,motif_15,motif_13
1	NC_080041.1_nlr4	TIR	4052365	4052743	+	motif_18,motif_15,motif_13
1	NC_080041.1_nlr5	TIR	4058103	4058454	+	motif_18,motif_15,motif_13
1	NC_080041.1_nlr6	TIR	4071151	4071511	+	motif_18,motif_15,motif_13
1	NC_080041.1_nlr7	TIR	4072052	4072412	+	motif_18,motif_15,motif_13
1	NC_080041.1_nlr8	TIR	4074811	4075165	+	motif_18,motif_15,motif_13
1	NC_080041.1_nlr9	TIR-NBARC	4075983	4078158	+	motif_18,motif_15,motif_13,motif_10
1	NC_080041.1_nlr10	TIR	4087975	4088335	+	motif_18,motif_15,motif_13
1	NC_080041.1_nlr11	TIR	4088741	4089101	+	motif_18,motif_15,motif_13
1	NC_080041.1_nlr12	TIR	4091534	4091891	+	motif_18,motif_15,motif_13
1	NC_080041.1_nlr13	TIR	4092605	4092965	+	motif_18,motif_15,motif_13
1	NC_080041.1_nlr14	TIR	4099036	4099402	+	motif_18,motif_15,motif_13
1	NC_080041.1_nlr15	TIR-LRR	4130282	4131118	+	motif_18,motif_15,motif_13,motif_19
1	NC_080041.1_nlr16	TIR	4131595	4131955	+	motif_18,motif_15,motif_13
1	NC_080041.1_nlr17	TIR	4144124	4144484	+	motif_18,motif_15,motif_13
1	NC_080041.1_nlr18	TIR	4148840	4149209	+	motif_18,motif_15,motif_13
1	NC_080041.1_nlr19	TIR	4149761	4150121	+	motif_18,motif_15,motif_13
1	NC_080041.1_nlr20	TIR	5331969	5332329	+	motif_18,motif_15,motif_13
1	NC_080041.1_nlr21	TIR	5361883	5362243	+	motif_18,motif_15,motif_13
1	NC_080041.1_nlr22	TIR	5405299	5405659	+	motif_18,motif_15,motif_13
1	NC_080041.1_nlr23	TIR	5419078	5419428	+	motif_18,motif_15,motif_13
1	NC_080041.1_nlr24	TIR	5473604	5473964	+	motif_18,motif_15,motif_13
1	NC_080041.1_nlr25	TIR	5524235	5524595	+	motif_18,motif_15,motif_13
1	NC_080041.1_nlr26	TIR-NBARC	6114529	6115773	+	motif_18,motif_15,motif_13,motif_1,motif_4,motif_4,motif_5,motif_5,motif_5,motif_10,motif_10,motif_3
1	NC_080041.1_nlr27	TIR-NBARC-LRR	6128167	6130701	+	motif_18,motif_15,motif_13,motif_1,motif_4,motif_4,motif_5,motif_5,motif_5,motif_10,motif_10,motif_3,motif_7,motif_9,motif_11,motif_11
1	NC_080041.1_nlr28	CC-NBARC-LRR	7633602	7636566	+	motif_17,motif_16,motif_1,motif_6,motif_6,motif_4,motif_4,motif_5,motif_5,motif_5,motif_10,motif_10,motif_10,motif_3,motif_3,motif_3,motif_12,motif_12,motif_12,motif_2,motif_2,motif_2,motif_8,motif_8,motif_7,motif_9,motif_11,motif_11,motif_11,motif_11,motif_11,motif_11,motif_11,motif_11,motif_11
1	NC_080041.1_nlr29	CC-NBARC-LRR	8030465	8033651	+	motif_17,motif_16,motif_1,motif_6,motif_6,motif_4,motif_4,motif_5,motif_5,motif_5,motif_10,motif_10,motif_10,motif_3,motif_3,motif_3,motif_12,motif_12,motif_12,motif_2,motif_2,motif_2,motif_8,motif_8,motif_7,motif_9,motif_11,motif_11,motif_11,motif_11,motif_11,motif_11,motif_11,motif_11,motif_11,motif_11,motif_11,motif_11
1	NC_080041.1_nlr30	CC-NBARC-LRR	8378517	8381475	+	motif_17,motif_16,motif_1,motif_6,motif_6,motif_4,motif_4,motif_5,motif_5,motif_5,motif_10,motif_10,motif_10,motif_3,motif_3,motif_3,motif_12,motif_12,motif_12,motif_2,motif_2,motif_2,motif_8,motif_8,motif_7,motif_9,motif_11,motif_11,motif_11,motif_11,motif_11,motif_11,motif_11,motif_11
1	NC_080041.1_nlr31	CC-NBARC-LRR	8397280	8400385	+	motif_17,motif_16,motif_1,motif_6,motif_6,motif_4,motif_4,motif_5,motif_5,motif_5,motif_10,motif_10,motif_10,motif_3,motif_3,motif_3,motif_12,motif_12,motif_12,motif_2,motif_2,motif_2,motif_8,motif_8,motif_7,motif_9,motif_11,motif_11,motif_11,motif_11,motif_11,motif_11,motif_11,motif_11,motif_11,motif_11
1	NC_080041.1_nlr32	CC-NBARC-LRR	8406173	8410955	+	motif_17,motif_16,motif_1,motif_6,motif_6,motif_4,motif_4,motif_5,motif_5,motif_5,motif_10,motif_10,motif_10,motif_3,motif_3,motif_3,motif_12,motif_12,motif_12,motif_2,motif_2,motif_2,motif_8,motif_8,motif_7,motif_9,motif_11,motif_11,motif_11,motif_11,motif_11,motif_11,motif_11,motif_11,motif_11,motif_11
1	NC_080041.1_nlr33	CC-NBARC-LRR	8442640	8449825	+	motif_17,motif_16,motif_1,motif_6,motif_6,motif_4,motif_4,motif_5,motif_5,motif_5,motif_10,motif_10,motif_10,motif_3,motif_3,motif_3,motif_12,motif_12,motif_12,motif_2,motif_2,motif_2,motif_8,motif_8,motif_7,motif_9,motif_11,motif_11,motif_11,motif_11,motif_11,motif_11,motif_11,motif_11,motif_11,motif_11,motif_11,motif_11,motif_11,motif_9,motif_11,motif_11,motif_11,motif_11,motif_11,motif_11,moti…
1	NC_080041.1_nlr34	NBARC	8447803	8448346	+	motif_10,motif_3,motif_3,motif_12,motif_12,motif_12,motif_2,motif_2,motif_2,motif_8,motif_8,motif_7
1	NC_080041.1_nlr35	NBARC-LRR	8460670	8462620	+	motif_10,motif_3,motif_3,motif_12,motif_12,motif_12,motif_2,motif_2,motif_2,motif_8,motif_8,motif_7,motif_9,motif_11,motif_19,motif_11,motif_11,motif_11,motif_11
1	NC_080041.1_nlr36	CC-NBARC-LRR	8478492	8481453	+	motif_17,motif_16,motif_1,motif_6,motif_6,motif_4,motif_4,motif_5,motif_5,motif_5,motif_10,motif_10,motif_10,motif_3,motif_3,motif_3,motif_12,motif_12,motif_12,motif_2,motif_2,motif_2,motif_8,motif_8,motif_7,motif_9,motif_11,motif_11,motif_11,motif_11,motif_11,motif_11,motif_11,motif_11,motif_11
1	NC_080041.1_nlr37	CC-NBARC-LRR	11497151	11500116	+	motif_16,motif_1,motif_6,motif_3,motif_12,motif_2,motif_9,motif_11,motif_9,motif_19,motif_11,motif_11,motif_11,motif_11,motif_11,motif_11,motif_11,motif_11,motif_11,motif_11
1	NC_080041.1_nlr38	NBARC-LRR	12840810	12843501	+	motif_1,motif_6,motif_6,motif_4,motif_4,motif_5,motif_5,motif_5,motif_10,motif_10,motif_10,motif_3,motif_3,motif_3,motif_12,motif_12,motif_2,motif_7,motif_9,motif_11,motif_11,motif_11,motif_11,motif_11
1	NC_080041.1_nlr39	CC-NBARC-LRR	18141101	18143834	+	motif_16,motif_1,motif_6,motif_6,motif_4,motif_4,motif_5,motif_5,motif_5,motif_10,motif_10,motif_10,motif_3,motif_3,motif_3,motif_12,motif_12,motif_12,motif_2,motif_2,motif_2,motif_8,motif_8,motif_7,motif_9,motif_11,motif_11,motif_11,motif_11,motif_11,motif_11,motif_11
1	NC_080041.1_nlr40	CC-NBARC-LRR	18426490	18429961	+	motif_17,motif_16,motif_1,motif_6,motif_3,motif_12,motif_12,motif_2,motif_2,motif_2,motif_8,motif_8,motif_7,motif_9,motif_11,motif_11,motif_11,motif_11,motif_11
1	NC_080041.1_nlr41	CC-NBARC-LRR	19704384	19707339	+	motif_17,motif_16,motif_1,motif_6,motif_6,motif_4,motif_4,motif_5,motif_5,motif_5,motif_10,motif_10,motif_10,motif_3,motif_3,motif_3,motif_12,motif_12,motif_12,motif_2,motif_2,motif_2,motif_8,motif_8,motif_7,motif_9,motif_11,motif_11,motif_11,motif_11,motif_11,motif_11,motif_11,motif_11,motif_11,motif_11
1	NC_080041.1_nlr42	TIR-NBARC-LRR	54228384	54231428	+	motif_18,motif_15,motif_13,motif_1,motif_4,motif_4,motif_5,motif_5,motif_5,motif_10,motif_10,motif_10,motif_3,motif_3,motif_12,motif_7,motif_9,motif_11,motif_11,motif_11,motif_11,motif_11,motif_11,motif_9,motif_9,motif_11,motif_11
1	NC_080041.1_nlr43	TIR-NBARC	54800407	54802918	+	motif_18,motif_15,motif_13,motif_1,motif_4,motif_4,motif_5,motif_5,motif_5,motif_10,motif_10,motif_3,motif_7
1	NC_080041.1_nlr44	TIR-NBARC	54803041	54805170	+	motif_18,motif_15,motif_13,motif_1,motif_4,motif_4,motif_5,motif_5,motif_5,motif_10,motif_10,motif_10,motif_3,motif_3,motif_12,motif_7
1	NC_080041.1_nlr45	NBARC	58178405	58178963	+	motif_1,motif_6,motif_4,motif_10,motif_3
1	NC_080041.1_nlr46	TIR	58179005	58179365	+	motif_18,motif_15,motif_13
1	NC_080041.1_nlr47	TIR-NBARC-LRR	67283772	67287543	+	motif_18,motif_15,motif_13,motif_1,motif_4,motif_4,motif_5,motif_5,motif_5,motif_10,motif_10,motif_10,motif_3,motif_3,motif_12,motif_7,motif_9,motif_11,motif_11,motif_11,motif_11,motif_9,motif_11,motif_11,motif_9,motif_11
1	NC_080041.1_nlr48	NBARC-LRR	73533679	73535551	+	motif_1,motif_6,motif_6,motif_4,motif_4,motif_5,motif_5,motif_5,motif_10,motif_10,motif_10,motif_3,motif_3,motif_3,motif_12,motif_12,motif_2,motif_7,motif_9,motif_9,motif_11
1	NC_080041.1_nlr49	CC-NBARC-LRR	87908328	87911410	+	motif_16,motif_1,motif_6,motif_6,motif_4,motif_4,motif_5,motif_5,motif_5,motif_10,motif_10,motif_10,motif_3,motif_3,motif_3,motif_12,motif_12,motif_12,motif_2,motif_2,motif_2,motif_8,motif_8,motif_7,motif_9,motif_11,motif_11,motif_11,motif_11,motif_11,motif_11,motif_11,motif_11,motif_11
1	NC_080041.1_nlr50	NBARC-LRR	87919769	87922461	+	motif_1,motif_6,motif_6,motif_4,motif_4,motif_5,motif_5,motif_5,motif_10,motif_10,motif_10,motif_3,motif_3,motif_3,motif_12,motif_12,motif_12,motif_2,motif_2,motif_2,motif_8,motif_8,motif_7,motif_11,motif_11,motif_11,motif_11,motif_11,motif_11,motif_11,motif_11,motif_11
1	NC_080041.1_nlr51	NBARC	93891339	93892881	+	motif_5,motif_3,motif_12,motif_12,motif_2,motif_2,motif_8,motif_7
1	NC_080041.1_nlr52	NBARC	93892886	93893699	+	motif_6,motif_3,motif_12,motif_12,motif_2,motif_2,motif_8
1	NC_080041.1_nlr53	NBARC	93897324	93897669	+	motif_3,motif_12,motif_12,motif_2,motif_2,motif_8
1	NC_080041.1_nlr54	NBARC-LRR	97919182	97923733	+	motif_1,motif_6,motif_6,motif_4,motif_4,motif_5,motif_5,motif_5,motif_10,motif_10,motif_10,motif_3,motif_3,motif_12,motif_7,motif_9,motif_9,motif_11,motif_11,motif_11,motif_11,motif_11,motif_11,motif_11
1	NC_080041.1_nlr55	TIR	99075743	99076109	+	motif_18,motif_15,motif_13
1	NC_080041.1_nlr56	CC-NBARC-LRR	99085927	99088552	+	motif_17,motif_16,motif_1,motif_6,motif_6,motif_4,motif_4,motif_5,motif_5,motif_5,motif_10,motif_10,motif_10,motif_3,motif_3,motif_3,motif_12,motif_12,motif_12,motif_2,motif_2,motif_2,motif_8,motif_8,motif_7,motif_9,motif_9,motif_11,motif_11,motif_11
1	NC_080041.1_nlr57	CC-NBARC-LRR	99091572	99094147	+	motif_17,motif_16,motif_1,motif_6,motif_6,motif_4,motif_4,motif_5,motif_5,motif_5,motif_10,motif_10,motif_10,motif_3,motif_3,motif_3,motif_12,motif_12,motif_12,motif_2,motif_2,motif_8,motif_9,motif_11,motif_11,motif_11
1	NC_080041.1_nlr58	CC-NBARC-LRR	99117883	99119758	+	motif_17,motif_16,motif_1,motif_6,motif_6,motif_4,motif_4,motif_5,motif_5,motif_5,motif_10,motif_10,motif_10,motif_3,motif_3,motif_3,motif_12,motif_12,motif_12,motif_2,motif_2,motif_8,motif_9
1	NC_080041.1_nlr59	NBARC-LRR	105121151	105122267	+	motif_6,motif_4,motif_10,motif_3,motif_12,motif_11
1	NC_080041.1_nlr60	TIR	105784411	105784768	+	motif_18,motif_15,motif_13
1	NC_080041.1_nlr61	NBARC	105797627	105798161	+	motif_1,motif_6,motif_4,motif_3
1	NC_080041.1_nlr62	TIR	105798203	105798560	+	motif_18,motif_15,motif_13
1	NC_080041.1_nlr63	TIR	106428867	106429224	+	motif_18,motif_15,motif_13
1	NC_080041.1_nlr64	TIR	107011967	107012324	+	motif_18,motif_15,motif_13
1	NC_080041.1_nlr65	NBARC	107174588	107175626	+	motif_1,motif_4,motif_5,motif_10,motif_3
1	NC_080041.1_nlr66	TIR	107175668	107176031	+	motif_18,motif_15,motif_13
1	NC_080041.1_nlr67	TIR-NBARC-LRR	115251337	115253481	+	motif_18,motif_15,motif_13,motif_1,motif_4,motif_4,motif_5,motif_5,motif_5,motif_10,motif_10,motif_10,motif_3,motif_3,motif_12,motif_7,motif_9
1	NC_080041.1_nlr68	NBARC	115263364	115264255	+	motif_1,motif_4,motif_4,motif_5,motif_5,motif_5,motif_10,motif_10,motif_3,motif_7
1	NC_080041.1_nlr69	TIR	116310833	116311190	+	motif_18,motif_15,motif_13
1	NC_080041.1_nlr70	TIR-NBARC-LRR	119533272	119538133	+	motif_18,motif_15,motif_13,motif_1,motif_4,motif_4,motif_5,motif_5,motif_5,motif_10,motif_10,motif_10,motif_3,motif_3,motif_12,motif_7,motif_11,motif_11,motif_11,motif_11,motif_9,motif_11,motif_11,motif_9,motif_11,motif_11,motif_9,motif_11
1	NC_080041.1_nlr71	CC-NBARC-LRR	121414511	121416896	+	motif_17,motif_1,motif_6,motif_6,motif_4,motif_4,motif_5,motif_5,motif_5,motif_10,motif_10,motif_3,motif_2,motif_7,motif_9,motif_9,motif_11,motif_11,motif_11
1	NC_080041.1_nlr72	CC-NBARC-LRR	123828158	123830664	+	motif_17,motif_1,motif_6,motif_6,motif_4,motif_4,motif_5,motif_5,motif_5,motif_10,motif_10,motif_10,motif_3,motif_3,motif_3,motif_12,motif_12,motif_12,motif_2,motif_2,motif_2,motif_8,motif_8,motif_7,motif_9,motif_11,motif_11,motif_11,motif_11,motif_11
1	NC_080041.1_nlr73	CC-NBARC-LRR	128918041	128920513	+	motif_17,motif_1,motif_6,motif_6,motif_4,motif_4,motif_5,motif_5,motif_5,motif_10,motif_10,motif_10,motif_3,motif_3,motif_3,motif_12,motif_12,motif_12,motif_2,motif_2,motif_2,motif_8,motif_8,motif_7,motif_9,motif_11,motif_11,motif_11,motif_11,motif_11,motif_11,motif_11,motif_11
1	NC_080041.1_nlr74	NBARC	130455815	130456457	+	motif_4,motif_5,motif_5,motif_10,motif_10,motif_3,motif_7
1	NC_080041.1_nlr75	TIR-NBARC	130462745	130464705	+	motif_18,motif_15,motif_13,motif_1,motif_4,motif_4,motif_5,motif_5,motif_5,motif_10,motif_10,motif_3,motif_7
1	NC_080041.1_nlr76	TIR-NBARC	130483780	130485499	+	motif_18,motif_15,motif_13,motif_1,motif_4,motif_4,motif_5,motif_5,motif_5,motif_10,motif_10,motif_3,motif_7
1	NC_080041.1_nlr77	TIR-NBARC-LRR	113309793	113313998	-	motif_18,motif_15,motif_13,motif_1,motif_4,motif_4,motif_5,motif_5,motif_5,motif_10,motif_10,motif_10,motif_3,motif_3,motif_12,motif_7,motif_11,motif_11,motif_11,motif_11,motif_11,motif_9,motif_11,motif_11,motif_11,motif_9,motif_9,motif_11,motif_9,motif_11
1	NC_080041.1_nlr78	TIR-NBARC-LRR	112117433	112120049	-	motif_18,motif_15,motif_13,motif_1,motif_4,motif_4,motif_5,motif_5,motif_5,motif_10,motif_10,motif_10,motif_3,motif_3,motif_12,motif_7,motif_11,motif_11,motif_11,motif_11,motif_9
1	NC_080041.1_nlr79	TIR-NBARC	110669806	110671573	-	motif_15,motif_1,motif_4,motif_4,motif_5,motif_5,motif_5,motif_10,motif_10,motif_10,motif_3,motif_3,motif_12,motif_7
1	NC_080041.1_nlr80	TIR-NBARC	110667357	110669800	-	motif_18,motif_15,motif_13,motif_1,motif_4,motif_4,motif_5,motif_5,motif_5,motif_10,motif_10,motif_10,motif_3,motif_3,motif_12,motif_7
1	NC_080041.1_nlr81	TIR-LRR	107189599	107192370	-	motif_18,motif_15,motif_13,motif_9
1	NC_080041.1_nlr82	TIR	107086275	107086635	-	motif_18,motif_15,motif_13
1	NC_080041.1_nlr83	TIR	106671367	106671724	-	motif_18,motif_15,motif_13
1	NC_080041.1_nlr84	NBARC	106649472	106650015	-	motif_1,motif_6,motif_5,motif_3
1	NC_080041.1_nlr85	TIR	106649073	106649430	-	motif_18,motif_15,motif_13
1	NC_080041.1_nlr86	NBARC	106619292	106619832	-	motif_1,motif_6,motif_3
1	NC_080041.1_nlr87	TIR-NBARC	106610056	106619247	-	motif_18,motif_15,motif_13,motif_1,motif_6,motif_3
1	NC_080041.1_nlr88	TIR	106609657	106610014	-	motif_18,motif_15,motif_13
1	NC_080041.1_nlr89	TIR	106587444	106587801	-	motif_18,motif_15,motif_13
1	NC_080041.1_nlr90	TIR	106544697	106545054	-	motif_18,motif_15,motif_13
1	NC_080041.1_nlr91	NBARC	106532202	106532742	-	motif_1,motif_6,motif_3
1	NC_080041.1_nlr92	TIR	106531797	106532160	-	motif_18,motif_15,motif_13
1	NC_080041.1_nlr93	TIR	106441512	106441875	-	motif_18,motif_15,motif_13
1	NC_080041.1_nlr94	TIR	106310815	106311172	-	motif_18,motif_15,motif_13
1	NC_080041.1_nlr95	CC-NBARC-LRR	103834175	103837819	-	motif_17,motif_16,motif_1,motif_6,motif_6,motif_4,motif_4,motif_5,motif_5,motif_10,motif_3,motif_12,motif_12,motif_2,motif_2,motif_2,motif_8,motif_8,motif_7,motif_9,motif_11,motif_11,motif_11
1	NC_080041.1_nlr96	TIR-NBARC-LRR	102423686	102426811	-	motif_18,motif_15,motif_13,motif_1,motif_4,motif_4,motif_5,motif_5,motif_5,motif_10,motif_10,motif_10,motif_3,motif_3,motif_12,motif_7,motif_11,motif_11,motif_11,motif_11,motif_9,motif_11,motif_9,motif_11
1	NC_080041.1_nlr97	TIR-NBARC-LRR	95970982	95974986	-	motif_18,motif_15,motif_13,motif_1,motif_4,motif_4,motif_5,motif_5,motif_5,motif_10,motif_10,motif_10,motif_3,motif_3,motif_12,motif_7,motif_9,motif_11,motif_11,motif_11,motif_11,motif_11,motif_11,motif_9,motif_9,motif_11
1	NC_080041.1_nlr98	TIR-NBARC-LRR	77598428	77602088	-	motif_18,motif_15,motif_13,motif_1,motif_4,motif_4,motif_5,motif_5,motif_5,motif_10,motif_10,motif_10,motif_3,motif_3,motif_12,motif_7,motif_11,motif_11,motif_11,motif_11,motif_9,motif_11,motif_11,motif_11,motif_11,motif_11,motif_9,motif_9,motif_11
1	NC_080041.1_nlr99	TIR-NBARC	49264421	49265780	-	motif_13,motif_1,motif_6,motif_5,motif_3
1	NC_080041.1_nlr100	TIR	49264016	49264379	-	motif_18,motif_15,motif_13
1	NC_080041.1_nlr101	NBARC	18966267	18966624	-	motif_1,motif_4,motif_5
1	NC_080041.1_nlr102	CC-NBARC-LRR	18764007	18765758	-	motif_17,motif_16,motif_1,motif_6,motif_5,motif_10,motif_10,motif_3,motif_3,motif_3,motif_12,motif_12,motif_12,motif_2,motif_2,motif_2,motif_8,motif_8,motif_7,motif_9,motif_11
1	NC_080041.1_nlr103	CC-NBARC	18733887	18735192	-	motif_17,motif_16,motif_1,motif_6,motif_6,motif_4,motif_4,motif_5,motif_5,motif_5,motif_10,motif_10,motif_10,motif_3,motif_3,motif_3,motif_12,motif_12,motif_2
1	NC_080041.1_nlr104	CC-NBARC-LRR	18438922	18441733	-	motif_17,motif_16,motif_1,motif_6,motif_6,motif_4,motif_4,motif_5,motif_5,motif_5,motif_10,motif_10,motif_10,motif_3,motif_3,motif_3,motif_12,motif_12,motif_12,motif_2,motif_2,motif_2,motif_8,motif_8,motif_7,motif_11,motif_11,motif_11,motif_11,motif_11,motif_11,motif_11,motif_11,motif_11,motif_11
1	NC_080041.1_nlr105	NBARC-LRR	17235327	17236785	-	motif_3,motif_12,motif_12,motif_2,motif_2,motif_2,motif_8,motif_8,motif_7,motif_9,motif_11,motif_11,motif_11,motif_11
1	NC_080041.1_nlr106	NBARC-LRR	9117387	9122567	-	motif_1,motif_4,motif_4,motif_5,motif_5,motif_5,motif_10,motif_10,motif_10,motif_3,motif_3,motif_3,motif_12,motif_12,motif_2,motif_9,motif_11,motif_19,motif_11,motif_11,motif_11,motif_11,motif_11,motif_11,motif_11,motif_11,motif_11
1	NC_080041.1_nlr107	CC-NBARC-LRR	9113061	9116034	-	motif_17,motif_16,motif_1,motif_6,motif_6,motif_4,motif_4,motif_5,motif_5,motif_5,motif_10,motif_10,motif_10,motif_3,motif_3,motif_3,motif_12,motif_12,motif_12,motif_2,motif_2,motif_2,motif_8,motif_8,motif_7,motif_9,motif_11,motif_11,motif_11,motif_11,motif_11,motif_11,motif_11,motif_11,motif_11
1	NC_080041.1_nlr108	CC-NBARC-LRR	7766522	7769633	-	motif_17,motif_16,motif_1,motif_6,motif_6,motif_4,motif_4,motif_5,motif_5,motif_5,motif_10,motif_10,motif_10,motif_3,motif_3,motif_3,motif_12,motif_12,motif_12,motif_2,motif_2,motif_2,motif_8,motif_8,motif_7,motif_9,motif_11,motif_11,motif_11,motif_11,motif_11,motif_11,motif_11,motif_11,motif_11,motif_11,motif_11
1	NC_080041.1_nlr109	TIR-NBARC	6209125	6210403	-	motif_18,motif_15,motif_13,motif_1,motif_4,motif_4,motif_5,motif_5,motif_10
1	NC_080041.1_nlr110	TIR	6093784	6094147	-	motif_18,motif_15,motif_13
1	NC_080041.1_nlr111	NBARC-LRR	6079039	6081562	-	motif_1,motif_4,motif_4,motif_5,motif_5,motif_5,motif_10,motif_10,motif_10,motif_3,motif_3,motif_3,motif_12,motif_12,motif_2,motif_11,motif_11,motif_11,motif_11,motif_9,motif_11
1	NC_080041.1_nlr112	TIR	4392532	4392892	-	motif_18,motif_15,motif_13
1	NC_080041.1_nlr113	TIR-LRR	4368909	4371558	-	motif_18,motif_15,motif_13,motif_11
1	NC_080041.1_nlr114	NBARC	4357926	4358478	-	motif_1,motif_4,motif_4,motif_5,motif_5,motif_5,motif_10,motif_10,motif_3
1	NC_080041.1_nlr115	TIR-NBARC	4347913	4357887	-	motif_18,motif_15,motif_13,motif_1,motif_4,motif_4,motif_5,motif_5,motif_5,motif_10,motif_10,motif_3,motif_2
1	NC_080041.1_nlr116	TIR-NBARC	4343660	4349485	-	motif_18,motif_15,motif_13,motif_1,motif_6,motif_4,motif_10,motif_3
1	NC_080041.1_nlr117	TIR	4343258	4343618	-	motif_18,motif_15,motif_13
1	NC_080041.1_nlr118	NBARC	4272668	4273220	-	motif_1,motif_6,motif_4,motif_3
1	NC_080041.1_nlr119	TIR	4272260	4272626	-	motif_18,motif_15,motif_13
1	NC_080041.1_nlr120	TIR-NBARC	4207789	4212060	-	motif_18,motif_15,motif_13,motif_1,motif_4,motif_5,motif_8
1	NC_080041.1_nlr121	NBARC	4204990	4205542	-	motif_1,motif_6,motif_6,motif_4,motif_4,motif_5,motif_5,motif_5,motif_10,motif_10,motif_3
1	NC_080041.1_nlr122	TIR	4204588	4204948	-	motif_18,motif_15,motif_13
1	NC_080041.1_nlr123	TIR-LRR	3362468	3363293	-	motif_18,motif_15,motif_13,motif_19
1	NC_080041.1_nlr124	NBARC-LRR	1258196	1261193	-	motif_1,motif_4,motif_4,motif_5,motif_5,motif_5,motif_10,motif_10,motif_10,motif_3,motif_3,motif_3,motif_12,motif_12,motif_2,motif_7,motif_9,motif_11,motif_11,motif_11,motif_11,motif_11,motif_11,motif_11,motif_11
1	NC_080041.1_nlr125	NBARC-LRR	1245053	1248042	-	motif_1,motif_4,motif_4,motif_5,motif_5,motif_5,motif_10,motif_10,motif_10,motif_3,motif_3,motif_3,motif_12,motif_12,motif_2,motif_7,motif_9,motif_11,motif_11,motif_11,motif_11,motif_11,motif_11
2	NC_080042.1_nlr1	CC-NBARC-LRR	1090896	1093407	+	motif_17,motif_1,motif_6,motif_6,motif_4,motif_4,motif_5,motif_5,motif_5,motif_10,motif_10,motif_10,motif_3,motif_3,motif_3,motif_12,motif_12,motif_12,motif_2,motif_2,motif_2,motif_8,motif_8,motif_7,motif_9,motif_9,motif_11,motif_11,motif_11
2	NC_080042.1_nlr2	TIR-NBARC-LRR	16121730	16124749	+	motif_18,motif_15,motif_13,motif_1,motif_4,motif_4,motif_5,motif_5,motif_5,motif_10,motif_10,motif_10,motif_3,motif_3,motif_12,motif_7,motif_9,motif_11,motif_11,motif_11,motif_11,motif_9,motif_9,motif_11
2	NC_080042.1_nlr3	TIR-NBARC-LRR	16960406	16963357	+	motif_18,motif_15,motif_13,motif_1,motif_4,motif_4,motif_5,motif_5,motif_5,motif_10,motif_10,motif_10,motif_3,motif_3,motif_12,motif_7,motif_11,motif_11,motif_11,motif_11,motif_11,motif_9,motif_9,motif_11
2	NC_080042.1_nlr4	TIR-NBARC-LRR	20943464	20946980	+	motif_18,motif_15,motif_13,motif_1,motif_4,motif_4,motif_5,motif_5,motif_5,motif_10,motif_10,motif_10,motif_3,motif_3,motif_12,motif_7,motif_11,motif_11,motif_11,motif_9,motif_11,motif_11
2	NC_080042.1_nlr5	NBARC	42355269	42356094	+	motif_1,motif_5,motif_10,motif_3,motif_8,motif_7
2	NC_080042.1_nlr6	TIR-NBARC-LRR	43458411	43461248	+	motif_18,motif_15,motif_13,motif_5,motif_10,motif_10,motif_3,motif_3,motif_12,motif_7,motif_11,motif_11,motif_11,motif_9
2	NC_080042.1_nlr7	TIR-NBARC-LRR	43467475	43470012	+	motif_18,motif_15,motif_13,motif_1,motif_4,motif_4,motif_5,motif_5,motif_5,motif_10,motif_10,motif_10,motif_3,motif_3,motif_12,motif_7,motif_9,motif_11,motif_11,motif_11,motif_9
2	NC_080042.1_nlr8	TIR-NBARC	43475378	43477059	+	motif_18,motif_15,motif_13,motif_1,motif_4,motif_4,motif_5,motif_5,motif_5,motif_10,motif_10,motif_10,motif_3,motif_3,motif_12,motif_7
2	NC_080042.1_nlr9	TIR-NBARC-LRR	44368140	44371494	+	motif_18,motif_15,motif_13,motif_1,motif_4,motif_4,motif_5,motif_5,motif_5,motif_10,motif_10,motif_10,motif_3,motif_3,motif_12,motif_7,motif_11,motif_11,motif_11,motif_11,motif_9,motif_9
2	NC_080042.1_nlr10	TIR-NBARC	44385461	44386824	+	motif_18,motif_15,motif_13,motif_1,motif_4,motif_4,motif_5,motif_5,motif_5,motif_10,motif_10,motif_3
2	NC_080042.1_nlr11	TIR-NBARC-LRR	44406907	44409445	+	motif_18,motif_15,motif_13,motif_1,motif_4,motif_4,motif_5,motif_5,motif_5,motif_10,motif_10,motif_10,motif_3,motif_3,motif_12,motif_11,motif_11,motif_11,motif_11
2	NC_080042.1_nlr12	TIR-NBARC	44436205	44437568	+	motif_18,motif_15,motif_13,motif_1,motif_4,motif_4,motif_5,motif_5,motif_5,motif_10,motif_10,motif_3
2	NC_080042.1_nlr13	TIR-NBARC-LRR	44449690	44452577	+	motif_18,motif_15,motif_13,motif_1,motif_4,motif_4,motif_5,motif_5,motif_5,motif_10,motif_10,motif_10,motif_3,motif_3,motif_12,motif_7,motif_9
2	NC_080042.1_nlr14	TIR-NBARC	44464818	44466174	+	motif_18,motif_15,motif_13,motif_1,motif_4,motif_4,motif_5,motif_5,motif_5,motif_10,motif_10,motif_10,motif_3,motif_3,motif_12,motif_7
2	NC_080042.1_nlr15	CC-NBARC-LRR	48296890	48300160	+	motif_16,motif_1,motif_6,motif_6,motif_4,motif_4,motif_5,motif_5,motif_5,motif_10,motif_10,motif_10,motif_3,motif_3,motif_3,motif_12,motif_12,motif_12,motif_2,motif_2,motif_2,motif_8,motif_8,motif_7,motif_9,motif_11,motif_9,motif_19,motif_11,motif_11,motif_11,motif_11,motif_19,motif_11,motif_11,motif_11,motif_11,motif_11,motif_11
2	NC_080042.1_nlr16	TIR-NBARC-LRR	52678805	52681858	+	motif_18,motif_15,motif_13,motif_4,motif_5,motif_5,motif_10,motif_10,motif_10,motif_3,motif_3,motif_12,motif_7,motif_11,motif_11,motif_11,motif_11,motif_9,motif_9,motif_11
2	NC_080042.1_nlr17	TIR-NBARC-LRR	58713275	58716273	+	motif_18,motif_15,motif_13,motif_1,motif_4,motif_4,motif_5,motif_5,motif_5,motif_10,motif_10,motif_3,motif_7,motif_11,motif_11,motif_11,motif_11,motif_9,motif_11,motif_11
2	NC_080042.1_nlr18	TIR-NBARC-LRR	59234264	59237364	+	motif_18,motif_15,motif_13,motif_4,motif_5,motif_5,motif_10,motif_10,motif_10,motif_3,motif_3,motif_12,motif_7,motif_11
2	NC_080042.1_nlr19	TIR-NBARC-LRR	59249791	59256947	+	motif_18,motif_15,motif_13,motif_4,motif_5,motif_5,motif_10,motif_10,motif_10,motif_3,motif_3,motif_12,motif_7,motif_11,motif_11,motif_11,motif_11,motif_11,motif_11,motif_11,motif_11,motif_11,motif_11,motif_11,motif_9,motif_9,motif_9,motif_11
2	NC_080042.1_nlr20	TIR	59277812	59278172	+	motif_18,motif_15,motif_13
2	NC_080042.1_nlr21	TIR-NBARC-LRR	59289038	59291947	+	motif_18,motif_15,motif_13,motif_1,motif_4,motif_4,motif_5,motif_5,motif_5,motif_10,motif_10,motif_10,motif_3,motif_3,motif_12,motif_7,motif_11,motif_11,motif_11,motif_11,motif_9,motif_11,motif_11,motif_11
2	NC_080042.1_nlr22	NBARC	59304829	59305705	+	motif_1,motif_4,motif_4,motif_5,motif_5,motif_5,motif_10,motif_10,motif_10,motif_3,motif_3,motif_12,motif_7
2	NC_080042.1_nlr23	TIR-NBARC-LRR	59327743	59329902	+	motif_18,motif_15,motif_13,motif_1,motif_4,motif_4,motif_5,motif_5,motif_5,motif_10,motif_10,motif_10,motif_3,motif_3,motif_12,motif_7,motif_9
2	NC_080042.1_nlr24	TIR-NBARC-LRR	59344008	59350468	+	motif_18,motif_15,motif_13,motif_1,motif_4,motif_4,motif_5,motif_5,motif_5,motif_10,motif_10,motif_10,motif_3,motif_3,motif_12,motif_9,motif_11,motif_11,motif_11,motif_11,motif_9,motif_11,motif_11,motif_11
2	NC_080042.1_nlr25	TIR	59353916	59354276	+	motif_18,motif_15,motif_13
2	NC_080042.1_nlr26	TIR-NBARC	59360985	59362836	+	motif_18,motif_15,motif_13,motif_1,motif_4,motif_4,motif_5,motif_5,motif_5,motif_10,motif_10,motif_10,motif_3,motif_3,motif_12
2	NC_080042.1_nlr27	NBARC-LRR	59363323	59367243	+	motif_1,motif_4,motif_4,motif_5,motif_5,motif_5,motif_10,motif_10,motif_3,motif_7,motif_9,motif_9,motif_11,motif_11,motif_11,motif_11,motif_9,motif_9,motif_11,motif_9,motif_11,motif_11,motif_11
2	NC_080042.1_nlr28	TIR-NBARC	59364007	59365409	+	motif_18,motif_15,motif_13,motif_1,motif_4,motif_4,motif_5,motif_5,motif_5,motif_10,motif_10,motif_3
2	NC_080042.1_nlr29	TIR-NBARC-LRR	59383004	59386061	+	motif_18,motif_15,motif_13,motif_1,motif_4,motif_4,motif_5,motif_5,motif_5,motif_10,motif_10,motif_10,motif_3,motif_3,motif_12,motif_11,motif_9,motif_11,motif_11,motif_11,motif_9,motif_9,motif_9,motif_11
2	NC_080042.1_nlr30	TIR-NBARC-LRR	59414294	59418164	+	motif_18,motif_15,motif_13,motif_1,motif_4,motif_4,motif_5,motif_5,motif_5,motif_10,motif_10,motif_10,motif_3,motif_3,motif_12,motif_7,motif_9,motif_11,motif_11,motif_11,motif_9,motif_11,motif_11,motif_9,motif_11
2	NC_080042.1_nlr31	TIR-NBARC	59421631	59432352	+	motif_18,motif_15,motif_13,motif_1,motif_4,motif_4,motif_5,motif_5,motif_5,motif_10,motif_10,motif_10,motif_3,motif_3,motif_12,motif_7
2	NC_080042.1_nlr32	TIR-NBARC-LRR	59874627	59877061	+	motif_18,motif_15,motif_13,motif_1,motif_4,motif_4,motif_5,motif_5,motif_5,motif_10,motif_10,motif_10,motif_3,motif_3,motif_12,motif_7,motif_9,motif_9,motif_11
2	NC_080042.1_nlr33	TIR-NBARC-LRR	60101321	60104405	+	motif_18,motif_15,motif_13,motif_1,motif_4,motif_4,motif_5,motif_5,motif_5,motif_10,motif_10,motif_10,motif_3,motif_3,motif_12,motif_7,motif_11,motif_11,motif_11,motif_11,motif_9,motif_9,motif_11
2	NC_080042.1_nlr34	NBARC	61401157	61401727	+	motif_1,motif_4,motif_4,motif_5,motif_5,motif_5,motif_10,motif_10,motif_3
2	NC_080042.1_nlr35	TIR-NBARC	61419984	61421859	+	motif_18,motif_15,motif_13,motif_1,motif_4,motif_4,motif_5,motif_5,motif_10
2	NC_080042.1_nlr36	TIR	61436777	61437119	+	motif_18,motif_15,motif_13
2	NC_080042.1_nlr37	TIR-NBARC-LRR	61476726	61479086	+	motif_18,motif_15,motif_13,motif_1,motif_4,motif_4,motif_5,motif_5,motif_5,motif_10,motif_10,motif_10,motif_3,motif_3,motif_12,motif_7,motif_9
2	NC_080042.1_nlr38	TIR-NBARC-LRR	61482011	61485118	+	motif_18,motif_15,motif_13,motif_1,motif_4,motif_4,motif_5,motif_5,motif_5,motif_10,motif_10,motif_10,motif_3,motif_3,motif_12,motif_7,motif_11,motif_11,motif_11,motif_9,motif_9,motif_9,motif_11,motif_11
2	NC_080042.1_nlr39	TIR-NBARC-LRR	61492770	61497719	+	motif_18,motif_15,motif_13,motif_1,motif_4,motif_4,motif_5,motif_5,motif_5,motif_10,motif_10,motif_10,motif_3,motif_3,motif_12,motif_7,motif_11,motif_11,motif_11,motif_9,motif_11,motif_9,motif_11
2	NC_080042.1_nlr40	TIR-NBARC	61515721	61517538	+	motif_18,motif_15,motif_13,motif_1,motif_4,motif_4,motif_5,motif_5,motif_5,motif_10,motif_10,motif_10,motif_3,motif_3,motif_12,motif_7
2	NC_080042.1_nlr41	NBARC	67900330	67900774	+	motif_1,motif_6
2	NC_080042.1_nlr42	CC-NBARC-LRR	72353166	72356013	+	motif_17,motif_16,motif_1,motif_6,motif_6,motif_4,motif_4,motif_5,motif_5,motif_5,motif_10,motif_10,motif_10,motif_3,motif_3,motif_3,motif_12,motif_12,motif_12,motif_2,motif_2,motif_2,motif_8,motif_8,motif_7,motif_9,motif_11,motif_11,motif_19,motif_11,motif_11,motif_11,motif_11,motif_11
2	NC_080042.1_nlr43	CC-NBARC-LRR	72360565	72363697	+	motif_17,motif_16,motif_1,motif_6,motif_6,motif_4,motif_4,motif_5,motif_5,motif_5,motif_10,motif_10,motif_10,motif_3,motif_3,motif_3,motif_12,motif_12,motif_12,motif_2,motif_2,motif_2,motif_8,motif_8,motif_7,motif_9,motif_11,motif_11,motif_19,motif_11,motif_11,motif_11,motif_11,motif_11,motif_11,motif_11,motif_11
2	NC_080042.1_nlr44	CC-NBARC-LRR	73438698	73441896	+	motif_17,motif_16,motif_1,motif_6,motif_6,motif_4,motif_4,motif_5,motif_5,motif_5,motif_10,motif_10,motif_10,motif_3,motif_3,motif_3,motif_12,motif_12,motif_12,motif_2,motif_2,motif_2,motif_8,motif_8,motif_7,motif_9,motif_11,motif_11,motif_19,motif_11,motif_11,motif_9,motif_11,motif_11,motif_11,motif_11,motif_11,motif_11,motif_11
2	NC_080042.1_nlr45	TIR	78455310	78455667	+	motif_18,motif_15,motif_13
2	NC_080042.1_nlr46	TIR	78458302	78458659	+	motif_18,motif_15,motif_13
2	NC_080042.1_nlr47	TIR	78462341	78462698	+	motif_18,motif_15,motif_13
2	NC_080042.1_nlr48	NBARC-LRR	78555413	78560036	+	motif_1,motif_4,motif_4,motif_5,motif_5,motif_5,motif_10,motif_10,motif_10,motif_3,motif_3,motif_12,motif_7,motif_11,motif_11,motif_11,motif_9,motif_11,motif_11,motif_9,motif_11,motif_9,motif_11,motif_9,motif_11,motif_9,motif_11,motif_9,motif_11,motif_11,motif_11
2	NC_080042.1_nlr49	TIR-NBARC-LRR	81878992	81881935	+	motif_18,motif_15,motif_13,motif_5,motif_10,motif_10,motif_3,motif_3,motif_12,motif_7,motif_11,motif_11,motif_11,motif_9,motif_9,motif_11
2	NC_080042.1_nlr50	TIR-NBARC-LRR	81895823	81898765	+	motif_18,motif_15,motif_13,motif_1,motif_4,motif_4,motif_5,motif_5,motif_5,motif_10,motif_10,motif_10,motif_3,motif_3,motif_12,motif_7,motif_11,motif_11,motif_11,motif_9,motif_9,motif_11
2	NC_080042.1_nlr51	TIR-NBARC-LRR	81908700	81911597	+	motif_18,motif_15,motif_13,motif_1,motif_4,motif_4,motif_5,motif_5,motif_5,motif_10,motif_10,motif_10,motif_3,motif_3,motif_12,motif_7,motif_11,motif_11,motif_11,motif_11,motif_9,motif_9,motif_11
2	NC_080042.1_nlr52	TIR-NBARC-LRR	81924961	81927856	+	motif_18,motif_15,motif_13,motif_1,motif_4,motif_4,motif_5,motif_5,motif_5,motif_10,motif_10,motif_10,motif_3,motif_3,motif_12,motif_7,motif_11,motif_11,motif_11,motif_11,motif_9,motif_9,motif_11
2	NC_080042.1_nlr53	CC-NBARC-LRR	82050760	82053129	+	motif_16,motif_1,motif_6,motif_6,motif_4,motif_4,motif_5,motif_5,motif_5,motif_10,motif_10,motif_10,motif_3,motif_3,motif_3,motif_12,motif_12,motif_12,motif_2,motif_2,motif_2,motif_8,motif_8,motif_7,motif_9,motif_11,motif_9,motif_19,motif_11,motif_11
2	NC_080042.1_nlr54	NBARC	92227466	92228024	+	motif_1,motif_6,motif_4,motif_10,motif_3
2	NC_080042.1_nlr55	TIR	92228066	92228426	+	motif_18,motif_15,motif_13
2	NC_080042.1_nlr56	TIR	93280538	93280898	-	motif_18,motif_15,motif_13
2	NC_080042.1_nlr57	CC-NBARC-LRR	88193302	88195906	-	motif_17,motif_16,motif_1,motif_6,motif_6,motif_4,motif_4,motif_5,motif_5,motif_5,motif_10,motif_10,motif_10,motif_3,motif_3,motif_3,motif_12,motif_12,motif_12,motif_2,motif_2,motif_2,motif_8,motif_8,motif_7,motif_9,motif_9,motif_11,motif_11
2	NC_080042.1_nlr58	NBARC-LRR	83276089	83281121	-	motif_1,motif_6,motif_10,motif_3,motif_3,motif_12,motif_12,motif_2,motif_7,motif_9,motif_11,motif_11,motif_11,motif_11,motif_11,motif_11,motif_11,motif_11,motif_11
2	NC_080042.1_nlr59	CC-NBARC-LRR	82686897	82689465	-	motif_16,motif_1,motif_6,motif_6,motif_4,motif_4,motif_5,motif_5,motif_5,motif_10,motif_10,motif_10,motif_3,motif_3,motif_3,motif_12,motif_12,motif_12,motif_2,motif_2,motif_2,motif_8,motif_8,motif_7,motif_9,motif_11,motif_9,motif_19,motif_11,motif_11,motif_11
2	NC_080042.1_nlr60	CC-NBARC-LRR	81991475	81993467	-	motif_16,motif_1,motif_6,motif_6,motif_4,motif_5,motif_9,motif_11,motif_11,motif_19,motif_11,motif_11,motif_11,motif_11
2	NC_080042.1_nlr61	CC-NBARC-LRR	81802051	81805630	-	motif_17,motif_16,motif_1,motif_6,motif_6,motif_4,motif_4,motif_5,motif_5,motif_5,motif_10,motif_10,motif_10,motif_3,motif_3,motif_3,motif_12,motif_12,motif_12,motif_2,motif_2,motif_2,motif_8,motif_8,motif_7,motif_9,motif_11,motif_11,motif_19,motif_11,motif_11,motif_11,motif_11,motif_19,motif_11,motif_11,motif_11,motif_11,motif_11,motif_11,motif_11
2	NC_080042.1_nlr62	CC-NBARC-LRR	81794367	81797470	-	motif_16,motif_1,motif_6,motif_6,motif_4,motif_4,motif_5,motif_5,motif_5,motif_10,motif_10,motif_10,motif_3,motif_3,motif_3,motif_12,motif_12,motif_12,motif_2,motif_2,motif_2,motif_8,motif_8,motif_7,motif_9,motif_11,motif_19,motif_11,motif_11,motif_11,motif_11,motif_11,motif_11,motif_11,motif_11,motif_11,motif_11
2	NC_080042.1_nlr63	CC-NBARC-LRR	81688998	81692036	-	motif_17,motif_16,motif_1,motif_6,motif_4,motif_5,motif_5,motif_10,motif_10,motif_10,motif_3,motif_3,motif_3,motif_12,motif_12,motif_12,motif_2,motif_2,motif_2,motif_8,motif_8,motif_7,motif_9,motif_9,motif_9,motif_11,motif_11
2	NC_080042.1_nlr64	CC-NBARC-LRR	81676497	81679886	-	motif_17,motif_16,motif_1,motif_6,motif_6,motif_4,motif_4,motif_5,motif_5,motif_5,motif_10,motif_10,motif_10,motif_3,motif_3,motif_3,motif_12,motif_12,motif_12,motif_2,motif_2,motif_2,motif_8,motif_8,motif_7,motif_9,motif_9,motif_9,motif_11
2	NC_080042.1_nlr65	NBARC-LRR	79041862	79042705	-	motif_3,motif_12,motif_12,motif_2,motif_2,motif_8,motif_9,motif_11,motif_11
2	NC_080042.1_nlr66	NBARC	79012028	79012397	-	motif_1,motif_4,motif_5
2	NC_080042.1_nlr67	CC-NBARC-LRR	78999584	79002686	-	motif_17,motif_16,motif_1,motif_6,motif_6,motif_4,motif_4,motif_5,motif_5,motif_5,motif_10,motif_10,motif_10,motif_3,motif_3,motif_3,motif_12,motif_12,motif_12,motif_2,motif_2,motif_2,motif_8,motif_8,motif_7,motif_9,motif_11,motif_11,motif_19,motif_11,motif_11,motif_11,motif_11,motif_11,motif_11,motif_11
2	NC_080042.1_nlr68	CC-NBARC-LRR	78993883	78997069	-	motif_17,motif_16,motif_1,motif_6,motif_6,motif_4,motif_4,motif_5,motif_5,motif_5,motif_10,motif_10,motif_10,motif_3,motif_3,motif_3,motif_12,motif_12,motif_12,motif_2,motif_2,motif_2,motif_8,motif_8,motif_7,motif_9,motif_11,motif_11,motif_19,motif_11,motif_11,motif_11,motif_11,motif_11,motif_11,motif_11,motif_11,motif_11
2	NC_080042.1_nlr69	NBARC-LRR	78580793	78585333	-	motif_1,motif_4,motif_4,motif_5,motif_5,motif_5,motif_10,motif_10,motif_10,motif_3,motif_3,motif_12,motif_7,motif_11,motif_11,motif_11,motif_11,motif_9,motif_11,motif_9,motif_11,motif_9,motif_11,motif_9,motif_11,motif_9,motif_11,motif_9,motif_9,motif_11,motif_11,motif_11
2	NC_080042.1_nlr70	TIR-NBARC	78460432	78461155	-	motif_18,motif_15,motif_13,motif_10
2	NC_080042.1_nlr71	TIR-NBARC-LRR	65354080	65357177	-	motif_18,motif_15,motif_13,motif_1,motif_4,motif_4,motif_5,motif_5,motif_5,motif_10,motif_10,motif_10,motif_3,motif_3,motif_12,motif_7,motif_11,motif_11,motif_11,motif_9,motif_11,motif_9,motif_11
2	NC_080042.1_nlr72	TIR-NBARC-LRR	65116336	65119367	-	motif_18,motif_15,motif_13,motif_1,motif_4,motif_4,motif_5,motif_5,motif_5,motif_10,motif_10,motif_10,motif_3,motif_3,motif_12,motif_7,motif_9,motif_11,motif_11,motif_11,motif_11,motif_9,motif_11,motif_11,motif_11
2	NC_080042.1_nlr73	TIR-NBARC-LRR	64910777	64915460	-	motif_18,motif_15,motif_13,motif_1,motif_4,motif_4,motif_5,motif_5,motif_5,motif_10,motif_10,motif_10,motif_3,motif_3,motif_12,motif_7,motif_11,motif_11,motif_11,motif_9,motif_11,motif_9,motif_11,motif_11
2	NC_080042.1_nlr74	NBARC	64909334	64909913	-	motif_1,motif_4,motif_4,motif_5,motif_5,motif_5,motif_10,motif_10,motif_10,motif_3,motif_3,motif_12
2	NC_080042.1_nlr75	TIR	60511099	60511459	-	motif_18,motif_15,motif_13
2	NC_080042.1_nlr76	TIR-NBARC-LRR	60280639	60283531	-	motif_18,motif_15,motif_13,motif_4,motif_5,motif_5,motif_10,motif_10,motif_10,motif_3,motif_3,motif_12,motif_7,motif_11,motif_11,motif_11,motif_9,motif_11
2	NC_080042.1_nlr77	TIR-NBARC-LRR	60267712	60270751	-	motif_18,motif_15,motif_13,motif_1,motif_4,motif_4,motif_5,motif_5,motif_5,motif_10,motif_10,motif_10,motif_3,motif_3,motif_12,motif_7,motif_11,motif_11,motif_11,motif_11,motif_9,motif_11,motif_11,motif_11
2	NC_080042.1_nlr78	TIR-NBARC-LRR	60234816	60237781	-	motif_18,motif_13,motif_1,motif_4,motif_4,motif_5,motif_5,motif_5,motif_10,motif_10,motif_10,motif_3,motif_3,motif_12,motif_7,motif_11,motif_11,motif_11,motif_9,motif_11
2	NC_080042.1_nlr79	TIR-NBARC-LRR	60223772	60226376	-	motif_18,motif_15,motif_13,motif_1,motif_4,motif_4,motif_5,motif_5,motif_5,motif_10,motif_10,motif_10,motif_3,motif_3,motif_12,motif_7,motif_11,motif_11,motif_11,motif_11,motif_9
2	NC_080042.1_nlr80	TIR-NBARC-LRR	47544580	47551653	-	motif_18,motif_15,motif_13,motif_1,motif_4,motif_4,motif_5,motif_5,motif_5,motif_10,motif_10,motif_10,motif_3,motif_3,motif_12,motif_7,motif_9,motif_11,motif_11,motif_9,motif_11,motif_11,motif_11,motif_9,motif_11,motif_11,motif_9,motif_11
2	NC_080042.1_nlr81	TIR-NBARC-LRR	43512532	43515742	-	motif_18,motif_15,motif_13,motif_1,motif_4,motif_4,motif_5,motif_5,motif_5,motif_10,motif_10,motif_10,motif_3,motif_3,motif_12,motif_7,motif_11,motif_11,motif_11,motif_9,motif_9,motif_11,motif_11
2	NC_080042.1_nlr82	TIR-NBARC-LRR	43414139	43417413	-	motif_18,motif_15,motif_13,motif_1,motif_4,motif_4,motif_5,motif_5,motif_5,motif_10,motif_10,motif_10,motif_3,motif_3,motif_12,motif_7,motif_9,motif_11,motif_11,motif_9
2	NC_080042.1_nlr83	TIR-NBARC-LRR	43386137	43388870	-	motif_18,motif_15,motif_13,motif_1,motif_4,motif_4,motif_5,motif_5,motif_5,motif_10,motif_10,motif_10,motif_3,motif_3,motif_12,motif_7,motif_11,motif_11,motif_9,motif_11
2	NC_080042.1_nlr84	TIR	43380752	43381112	-	motif_18,motif_15,motif_13
2	NC_080042.1_nlr85	TIR-NBARC-LRR	32429988	32432978	-	motif_18,motif_15,motif_13,motif_1,motif_4,motif_4,motif_5,motif_5,motif_5,motif_10,motif_10,motif_10,motif_3,motif_3,motif_12,motif_7,motif_9,motif_11,motif_11,motif_11,motif_11,motif_11,motif_9,motif_9,motif_11
2	NC_080042.1_nlr86	TIR-NBARC-LRR	16411844	16414835	-	motif_18,motif_15,motif_13,motif_1,motif_4,motif_4,motif_5,motif_5,motif_5,motif_10,motif_10,motif_10,motif_3,motif_3,motif_12,motif_7,motif_11,motif_11,motif_11,motif_11,motif_11,motif_19,motif_9,motif_11
2	NC_080042.1_nlr87	TIR-NBARC	2759060	2763364	-	motif_18,motif_15,motif_13,motif_1,motif_4,motif_4,motif_5,motif_5,motif_5,motif_10,motif_10,motif_10,motif_3,motif_3,motif_12,motif_7
2	NC_080042.1_nlr88	NBARC	2709466	2710327	-	motif_1,motif_4,motif_4,motif_5,motif_5,motif_5,motif_10,motif_10,motif_10,motif_3,motif_3,motif_12,motif_7
2	NC_080042.1_nlr89	TIR	2709103	2709460	-	motif_18,motif_15,motif_13
2	NC_080042.1_nlr90	CC-NBARC-LRR	2084702	2087269	-	motif_17,motif_1,motif_6,motif_6,motif_4,motif_4,motif_5,motif_5,motif_5,motif_10,motif_10,motif_10,motif_3,motif_3,motif_3,motif_12,motif_12,motif_12,motif_2,motif_2,motif_2,motif_8,motif_8,motif_7,motif_9,motif_9,motif_11
3	NC_080043.1_nlr1	TIR-NBARC-LRR	2925400	2931525	+	motif_18,motif_15,motif_13,motif_1,motif_4,motif_4,motif_5,motif_5,motif_5,motif_10,motif_10,motif_10,motif_3,motif_3,motif_12,motif_7,motif_9,motif_11,motif_11,motif_11,motif_11,motif_9,motif_11,motif_11,motif_9,motif_11,motif_11
3	NC_080043.1_nlr2	NBARC	5989347	5990229	+	motif_1,motif_4,motif_4,motif_5,motif_5,motif_5,motif_10,motif_10,motif_3,motif_7
3	NC_080043.1_nlr3	TIR-NBARC-LRR	10212014	10215161	+	motif_18,motif_15,motif_13,motif_1,motif_4,motif_4,motif_5,motif_5,motif_5,motif_10,motif_10,motif_10,motif_3,motif_3,motif_12,motif_7,motif_11,motif_11,motif_11,motif_11,motif_9
3	NC_080043.1_nlr4	TIR-NBARC-LRR	10217874	10221079	+	motif_18,motif_15,motif_13,motif_1,motif_4,motif_4,motif_5,motif_5,motif_5,motif_10,motif_10,motif_10,motif_3,motif_3,motif_12,motif_7,motif_11,motif_11,motif_11,motif_11,motif_9
3	NC_080043.1_nlr5	TIR-NBARC	10225992	10227736	+	motif_18,motif_15,motif_13,motif_1,motif_4,motif_4,motif_5,motif_5,motif_5,motif_10,motif_10,motif_10,motif_3,motif_3,motif_12,motif_7
3	NC_080043.1_nlr6	TIR-NBARC-LRR	10231289	10234443	+	motif_18,motif_15,motif_13,motif_1,motif_4,motif_4,motif_5,motif_5,motif_5,motif_10,motif_10,motif_10,motif_3,motif_3,motif_12,motif_7,motif_11,motif_11,motif_11,motif_11,motif_9
3	NC_080043.1_nlr7	TIR-NBARC-LRR	10239008	10241512	+	motif_18,motif_15,motif_13,motif_1,motif_4,motif_4,motif_5,motif_5,motif_5,motif_10,motif_10,motif_10,motif_3,motif_3,motif_12,motif_7,motif_11,motif_11,motif_11,motif_11,motif_9
3	NC_080043.1_nlr8	TIR-NBARC-LRR	10245201	10247782	+	motif_18,motif_15,motif_1,motif_4,motif_4,motif_5,motif_5,motif_5,motif_10,motif_10,motif_10,motif_3,motif_3,motif_12,motif_7,motif_11,motif_11,motif_11,motif_11,motif_9
3	NC_080043.1_nlr9	TIR	10257478	10257835	+	motif_18,motif_15,motif_13
3	NC_080043.1_nlr10	CC-NBARC-LRR	13346208	13349574	+	motif_16,motif_1,motif_6,motif_6,motif_4,motif_4,motif_5,motif_5,motif_5,motif_10,motif_10,motif_10,motif_3,motif_3,motif_3,motif_12,motif_12,motif_12,motif_2,motif_2,motif_2,motif_8,motif_8,motif_7,motif_11,motif_9,motif_11,motif_9,motif_19,motif_11,motif_11,motif_11,motif_11,motif_11,motif_11,motif_11,motif_9,motif_11
3	NC_080043.1_nlr11	CC-NBARC-LRR	13355759	13359140	+	motif_16,motif_1,motif_6,motif_6,motif_4,motif_4,motif_5,motif_5,motif_5,motif_10,motif_10,motif_10,motif_3,motif_3,motif_3,motif_12,motif_12,motif_12,motif_2,motif_2,motif_2,motif_8,motif_8,motif_7,motif_11,motif_9,motif_11,motif_9,motif_19,motif_11,motif_11,motif_11,motif_11,motif_11,motif_11,motif_11,motif_11
3	NC_080043.1_nlr12	CC-NBARC-LRR	13631941	13634347	+	motif_17,motif_16,motif_1,motif_6,motif_6,motif_4,motif_4,motif_5,motif_5,motif_5,motif_10,motif_10,motif_10,motif_3,motif_3,motif_3,motif_12,motif_12,motif_12,motif_2,motif_2,motif_2,motif_8,motif_8,motif_7,motif_9,motif_9,motif_11,motif_11,motif_11
3	NC_080043.1_nlr13	TIR-NBARC-LRR	29093363	29096402	+	motif_18,motif_15,motif_13,motif_1,motif_4,motif_4,motif_5,motif_5,motif_5,motif_10,motif_10,motif_10,motif_3,motif_3,motif_12,motif_7,motif_9,motif_11,motif_11,motif_11,motif_11,motif_9,motif_11,motif_11
3	NC_080043.1_nlr14	TIR-NBARC-LRR	29112296	29115716	+	motif_18,motif_15,motif_13,motif_1,motif_4,motif_4,motif_5,motif_5,motif_5,motif_10,motif_10,motif_10,motif_3,motif_3,motif_12,motif_7,motif_9
3	NC_080043.1_nlr15	TIR-NBARC-LRR	37220220	37223171	+	motif_18,motif_15,motif_13,motif_1,motif_4,motif_4,motif_5,motif_5,motif_5,motif_10,motif_10,motif_10,motif_3,motif_3,motif_12,motif_7,motif_11,motif_11,motif_11,motif_11,motif_11,motif_11,motif_11,motif_9,motif_9,motif_11
3	NC_080043.1_nlr16	TIR-NBARC-LRR	43383191	43386196	+	motif_18,motif_15,motif_13,motif_1,motif_4,motif_4,motif_5,motif_5,motif_5,motif_10,motif_10,motif_10,motif_3,motif_3,motif_12,motif_7,motif_11,motif_11,motif_11,motif_11,motif_9,motif_9,motif_11
3	NC_080043.1_nlr17	TIR-NBARC-LRR	43447469	43455055	+	motif_18,motif_15,motif_13,motif_1,motif_4,motif_4,motif_5,motif_5,motif_5,motif_10,motif_10,motif_10,motif_3,motif_3,motif_12,motif_7,motif_9,motif_11,motif_11,motif_11,motif_9,motif_9,motif_9,motif_11
3	NC_080043.1_nlr18	CC-NBARC-LRR	63110492	63112835	+	motif_17,motif_16,motif_1,motif_6,motif_6,motif_4,motif_4,motif_5,motif_5,motif_5,motif_10,motif_10,motif_10,motif_3,motif_3,motif_3,motif_12,motif_12,motif_12,motif_2,motif_2,motif_2,motif_8,motif_8,motif_7,motif_9,motif_11,motif_11,motif_11,motif_11,motif_11,motif_11,motif_11,motif_11
3	NC_080043.1_nlr19	TIR	64375768	64376128	+	motif_18,motif_15,motif_13
3	NC_080043.1_nlr20	NBARC-LRR	64408827	64410952	+	motif_1,motif_4,motif_4,motif_5,motif_5,motif_5,motif_10,motif_10,motif_10,motif_3,motif_3,motif_12,motif_7,motif_9,motif_11,motif_11,motif_11,motif_9,motif_9,motif_11
3	NC_080043.1_nlr21	TIR-NBARC-LRR	66459596	66462662	+	motif_18,motif_15,motif_13,motif_1,motif_4,motif_4,motif_5,motif_5,motif_5,motif_10,motif_10,motif_10,motif_3,motif_3,motif_12,motif_7,motif_11,motif_11,motif_11,motif_9,motif_11
3	NC_080043.1_nlr22	TIR	66468129	66468486	+	motif_18,motif_15,motif_13
3	NC_080043.1_nlr23	NBARC-LRR	66479967	66483300	+	motif_1,motif_4,motif_5,motif_10,motif_10,motif_3,motif_3,motif_12,motif_7,motif_9
3	NC_080043.1_nlr24	TIR-NBARC-LRR	68182255	68185865	+	motif_18,motif_15,motif_13,motif_10,motif_3,motif_12,motif_11,motif_11,motif_11,motif_9,motif_11,motif_11
3	NC_080043.1_nlr25	TIR-NBARC-LRR	68217507	68219874	+	motif_18,motif_15,motif_13,motif_12,motif_7,motif_9,motif_9,motif_9,motif_11,motif_9
3	NC_080043.1_nlr26	CC-NBARC-LRR	69099948	69103603	+	motif_16,motif_1,motif_6,motif_6,motif_4,motif_4,motif_5,motif_5,motif_5,motif_10,motif_10,motif_10,motif_3,motif_3,motif_3,motif_12,motif_12,motif_12,motif_2,motif_2,motif_2,motif_8,motif_8,motif_7,motif_9,motif_9,motif_11,motif_9,motif_19,motif_11,motif_11,motif_11,motif_11,motif_11,motif_11,motif_11,motif_11,motif_11
3	NC_080043.1_nlr27	TIR-NBARC-LRR	78105788	78109078	+	motif_18,motif_15,motif_13,motif_1,motif_4,motif_4,motif_5,motif_5,motif_5,motif_10,motif_10,motif_10,motif_3,motif_3,motif_12,motif_7,motif_11,motif_11,motif_11,motif_11,motif_9,motif_11,motif_11,motif_9,motif_9,motif_11
3	NC_080043.1_nlr28	TIR-NBARC-LRR	82979611	82984811	+	motif_18,motif_15,motif_13,motif_10,motif_3,motif_12,motif_7,motif_9,motif_11,motif_11,motif_11,motif_9,motif_11,motif_11,motif_9,motif_11,motif_11,motif_11,motif_11,motif_9
3	NC_080043.1_nlr29	TIR-NBARC-LRR	82985327	82989399	+	motif_18,motif_15,motif_13,motif_1,motif_4,motif_4,motif_5,motif_5,motif_5,motif_10,motif_10,motif_10,motif_3,motif_3,motif_12,motif_7,motif_9,motif_9,motif_11,motif_11,motif_11,motif_9,motif_11,motif_9,motif_11,motif_9
3	NC_080043.1_nlr30	TIR-NBARC-LRR	83003283	83007097	+	motif_18,motif_15,motif_13,motif_1,motif_4,motif_4,motif_5,motif_5,motif_5,motif_10,motif_10,motif_10,motif_3,motif_3,motif_12,motif_7,motif_9,motif_9,motif_11,motif_11,motif_11,motif_9,motif_9,motif_11,motif_9,motif_11
3	NC_080043.1_nlr31	TIR-NBARC-LRR	83018647	83026378	+	motif_18,motif_15,motif_13,motif_1,motif_4,motif_5,motif_3,motif_7,motif_11,motif_11,motif_11,motif_9,motif_9,motif_11,motif_9,motif_11
3	NC_080043.1_nlr32	TIR-NBARC	83023316	83024605	+	motif_18,motif_15,motif_13,motif_1,motif_4,motif_5
3	NC_080043.1_nlr33	TIR-NBARC-LRR	83080251	83086877	+	motif_18,motif_15,motif_13,motif_1,motif_4,motif_4,motif_5,motif_5,motif_5,motif_10,motif_10,motif_10,motif_3,motif_3,motif_12,motif_7,motif_11,motif_11,motif_11,motif_9,motif_11,motif_9,motif_11
3	NC_080043.1_nlr34	TIR-NBARC-LRR	83101183	83104904	+	motif_18,motif_15,motif_13,motif_1,motif_4,motif_4,motif_5,motif_5,motif_5,motif_10,motif_10,motif_10,motif_3,motif_3,motif_12,motif_7,motif_9,motif_11,motif_11,motif_11,motif_9,motif_9,motif_11,motif_9,motif_11
3	NC_080043.1_nlr35	TIR-NBARC-LRR	83438476	83441619	+	motif_18,motif_15,motif_13,motif_1,motif_4,motif_4,motif_5,motif_5,motif_5,motif_10,motif_10,motif_10,motif_3,motif_3,motif_12,motif_7,motif_11,motif_19,motif_9,motif_11,motif_11
3	NC_080043.1_nlr36	TIR-NBARC-LRR	83446861	83450415	+	motif_18,motif_15,motif_13,motif_1,motif_4,motif_4,motif_5,motif_5,motif_5,motif_10,motif_10,motif_10,motif_3,motif_3,motif_12,motif_7,motif_9,motif_11,motif_11,motif_11,motif_11,motif_9,motif_11
3	NC_080043.1_nlr37	TIR-NBARC-LRR	92099060	92103451	+	motif_18,motif_15,motif_13,motif_1,motif_4,motif_4,motif_5,motif_5,motif_5,motif_10,motif_10,motif_10,motif_3,motif_3,motif_12,motif_7,motif_9,motif_11,motif_11,motif_11,motif_11,motif_11,motif_9,motif_11,motif_11,motif_11,motif_11,motif_11,motif_9,motif_11
3	NC_080043.1_nlr38	CC-NBARC-LRR	96015849	96018492	+	motif_17,motif_16,motif_1,motif_6,motif_6,motif_4,motif_4,motif_5,motif_5,motif_5,motif_10,motif_10,motif_10,motif_3,motif_3,motif_3,motif_12,motif_12,motif_12,motif_2,motif_2,motif_2,motif_8,motif_8,motif_7,motif_9,motif_9,motif_11
3	NC_080043.1_nlr39	CC-NBARC-LRR	96354036	96362849	-	motif_17,motif_16,motif_1,motif_6,motif_6,motif_4,motif_4,motif_5,motif_5,motif_5,motif_10,motif_10,motif_10,motif_3,motif_3,motif_3,motif_12,motif_12,motif_12,motif_2,motif_2,motif_2,motif_8,motif_8,motif_7,motif_9,motif_19,motif_11,motif_11,motif_11,motif_11,motif_11,motif_11,motif_11,motif_11,motif_11,motif_11
3	NC_080043.1_nlr40	NBARC	96352454	96353405	-	motif_1,motif_6,motif_6,motif_4,motif_4,motif_5,motif_5,motif_5,motif_10,motif_10,motif_10,motif_3,motif_3,motif_3,motif_12,motif_12,motif_12,motif_2,motif_2,motif_2,motif_8,motif_8,motif_7
3	NC_080043.1_nlr41	TIR-NBARC-LRR	94382335	94386065	-	motif_18,motif_15,motif_13,motif_1,motif_4,motif_4,motif_5,motif_5,motif_5,motif_10,motif_10,motif_10,motif_3,motif_3,motif_12,motif_7,motif_11,motif_11,motif_11,motif_11,motif_9,motif_11,motif_11
3	NC_080043.1_nlr42	TIR-NBARC-LRR	94367272	94370707	-	motif_18,motif_15,motif_13,motif_1,motif_4,motif_4,motif_5,motif_5,motif_5,motif_10,motif_10,motif_10,motif_3,motif_3,motif_12,motif_7,motif_11,motif_11,motif_11,motif_11,motif_9,motif_11,motif_11
3	NC_080043.1_nlr43	NBARC-LRR	94011743	94013009	-	motif_1,motif_6,motif_6,motif_4,motif_4,motif_5,motif_5,motif_5,motif_10,motif_10,motif_10,motif_3,motif_3,motif_3,motif_12,motif_12,motif_2,motif_7,motif_9
3	NC_080043.1_nlr44	TIR-NBARC-LRR	83196907	83208147	-	motif_18,motif_15,motif_13,motif_1,motif_4,motif_4,motif_5,motif_5,motif_5,motif_10,motif_10,motif_10,motif_3,motif_3,motif_12,motif_7,motif_11,motif_11,motif_11,motif_9,motif_11,motif_9,motif_11
3	NC_080043.1_nlr45	TIR-NBARC-LRR	83173556	83186214	-	motif_18,motif_15,motif_13,motif_1,motif_4,motif_4,motif_5,motif_5,motif_5,motif_10,motif_10,motif_10,motif_3,motif_3,motif_12,motif_7,motif_9,motif_11,motif_11,motif_11,motif_11,motif_11,motif_9,motif_11,motif_9
3	NC_080043.1_nlr46	TIR-NBARC-LRR	83155331	83161634	-	motif_18,motif_15,motif_13,motif_1,motif_4,motif_4,motif_5,motif_5,motif_10,motif_12,motif_11,motif_11,motif_11,motif_11,motif_9,motif_11,motif_11
3	NC_080043.1_nlr47	TIR-NBARC-LRR	83138311	83142770	-	motif_18,motif_15,motif_13,motif_1,motif_4,motif_4,motif_5,motif_5,motif_5,motif_10,motif_10,motif_10,motif_3,motif_3,motif_12,motif_7,motif_11,motif_11,motif_11,motif_11,motif_9,motif_11,motif_9,motif_11
3	NC_080043.1_nlr48	TIR-NBARC-LRR	83116614	83120470	-	motif_18,motif_15,motif_13,motif_1,motif_4,motif_5,motif_3,motif_12,motif_7,motif_9,motif_11,motif_11,motif_11,motif_9,motif_11,motif_9,motif_11
3	NC_080043.1_nlr49	TIR-NBARC-LRR	82967216	82970703	-	motif_18,motif_15,motif_13,motif_10,motif_3,motif_12,motif_7,motif_11,motif_11,motif_9,motif_11,motif_9,motif_11,motif_11
3	NC_080043.1_nlr50	NBARC-LRR	81975339	81976656	-	motif_1,motif_6,motif_6,motif_4,motif_4,motif_5,motif_5,motif_5,motif_10,motif_10,motif_3,motif_2,motif_8,motif_9,motif_9
3	NC_080043.1_nlr51	NBARC-LRR	70014002	70016291	-	motif_1,motif_4,motif_5,motif_19
3	NC_080043.1_nlr52	CC-NBARC-LRR	68820908	68823878	-	motif_17,motif_16,motif_1,motif_6,motif_6,motif_4,motif_4,motif_5,motif_5,motif_5,motif_10,motif_10,motif_10,motif_3,motif_3,motif_3,motif_12,motif_12,motif_12,motif_2,motif_2,motif_2,motif_8,motif_8,motif_7,motif_9,motif_11,motif_11,motif_11,motif_11,motif_11,motif_11,motif_11,motif_11
3	NC_080043.1_nlr53	CC-NBARC-LRR	67857126	67860462	-	motif_16,motif_1,motif_6,motif_6,motif_4,motif_4,motif_5,motif_5,motif_5,motif_10,motif_10,motif_10,motif_3,motif_3,motif_3,motif_12,motif_12,motif_12,motif_2,motif_2,motif_2,motif_8,motif_8,motif_7,motif_9,motif_9,motif_11,motif_9,motif_19,motif_11,motif_11,motif_11,motif_11,motif_11,motif_11
3	NC_080043.1_nlr54	NBARC	67845668	67845830	-	motif_1,motif_6
3	NC_080043.1_nlr55	CC-NBARC-LRR	67835018	67838366	-	motif_16,motif_1,motif_6,motif_6,motif_4,motif_4,motif_5,motif_5,motif_5,motif_10,motif_10,motif_10,motif_3,motif_3,motif_3,motif_12,motif_12,motif_12,motif_2,motif_2,motif_2,motif_8,motif_8,motif_7,motif_9,motif_9,motif_11,motif_9,motif_19,motif_11,motif_11,motif_11,motif_11,motif_11,motif_11,motif_11,motif_11
3	NC_080043.1_nlr56	NBARC-LRR	67128268	67130260	-	motif_1,motif_5,motif_10,motif_3,motif_2,motif_8,motif_7,motif_11,motif_11,motif_11,motif_11,motif_11,motif_11,motif_11
3	NC_080043.1_nlr57	TIR-NBARC-LRR	65782833	65786550	-	motif_18,motif_15,motif_13,motif_1,motif_4,motif_4,motif_5,motif_5,motif_5,motif_10,motif_10,motif_10,motif_3,motif_3,motif_12,motif_7,motif_11,motif_11,motif_11,motif_11,motif_9
3	NC_080043.1_nlr58	TIR-NBARC-LRR	51809237	51811238	-	motif_18,motif_4,motif_5,motif_5,motif_10,motif_10,motif_10,motif_3,motif_3,motif_12,motif_7,motif_11,motif_9
3	NC_080043.1_nlr59	TIR-NBARC-LRR	38324743	38329469	-	motif_18,motif_15,motif_13,motif_1,motif_4,motif_4,motif_5,motif_5,motif_5,motif_10,motif_10,motif_10,motif_3,motif_3,motif_12,motif_7,motif_9,motif_11,motif_11,motif_11,motif_11,motif_11,motif_11,motif_9,motif_9,motif_9
3	NC_080043.1_nlr60	CC-NBARC-LRR	34610303	34613675	-	motif_17,motif_16,motif_1,motif_6,motif_6,motif_4,motif_4,motif_5,motif_5,motif_5,motif_10,motif_10,motif_10,motif_3,motif_3,motif_3,motif_12,motif_12,motif_12,motif_2,motif_2,motif_2,motif_8,motif_8,motif_7,motif_9,motif_11,motif_11,motif_19,motif_11,motif_11,motif_11,motif_11,motif_11,motif_11
3	NC_080043.1_nlr61	TIR-NBARC	33497158	33498651	-	motif_18,motif_15,motif_13,motif_4,motif_5,motif_5,motif_10,motif_10,motif_3
3	NC_080043.1_nlr62	TIR-NBARC-LRR	33411379	33422480	-	motif_18,motif_15,motif_13,motif_1,motif_4,motif_4,motif_5,motif_5,motif_5,motif_10,motif_10,motif_10,motif_3,motif_3,motif_12,motif_7,motif_11,motif_11,motif_11,motif_9,motif_11,motif_11,motif_11
3	NC_080043.1_nlr63	NBARC	32260600	32261731	-	motif_1,motif_4,motif_4,motif_5,motif_5,motif_5,motif_10,motif_10,motif_10,motif_3,motif_3,motif_12,motif_7
3	NC_080043.1_nlr64	TIR-NBARC-LRR	32251279	32256618	-	motif_18,motif_15,motif_13,motif_1,motif_4,motif_4,motif_5,motif_5,motif_5,motif_10,motif_10,motif_10,motif_3,motif_3,motif_12,motif_8,motif_7,motif_11,motif_11,motif_11,motif_11
3	NC_080043.1_nlr65	TIR-NBARC-LRR	32234600	32238137	-	motif_18,motif_15,motif_13,motif_1,motif_4,motif_4,motif_5,motif_5,motif_5,motif_10,motif_10,motif_10,motif_3,motif_3,motif_12,motif_7,motif_11,motif_11,motif_11,motif_11
3	NC_080043.1_nlr66	TIR-NBARC	32184680	32186516	-	motif_18,motif_15,motif_13,motif_1,motif_4,motif_4,motif_5,motif_5,motif_5,motif_10,motif_10,motif_10,motif_3,motif_3,motif_12,motif_7
3	NC_080043.1_nlr67	NBARC-LRR	32116349	32118893	-	motif_1,motif_4,motif_4,motif_5,motif_5,motif_5,motif_10,motif_10,motif_10,motif_3,motif_3,motif_12,motif_8,motif_7,motif_11,motif_11,motif_11,motif_11
3	NC_080043.1_nlr68	TIR	32095468	32095828	-	motif_18,motif_15,motif_13
3	NC_080043.1_nlr69	NBARC	32072858	32073734	-	motif_1,motif_4,motif_4,motif_5,motif_5,motif_5,motif_10,motif_10,motif_10,motif_3,motif_3,motif_12,motif_7
3	NC_080043.1_nlr70	TIR-NBARC-LRR	32051466	32062013	-	motif_18,motif_15,motif_13,motif_1,motif_4,motif_4,motif_5,motif_5,motif_5,motif_10,motif_10,motif_10,motif_3,motif_3,motif_12,motif_8,motif_7,motif_11,motif_11,motif_11
3	NC_080043.1_nlr71	TIR-NBARC-LRR	31997045	32001909	-	motif_18,motif_15,motif_13,motif_1,motif_4,motif_4,motif_5,motif_5,motif_5,motif_10,motif_10,motif_10,motif_3,motif_3,motif_12,motif_7,motif_9,motif_11,motif_11,motif_11
3	NC_080043.1_nlr72	TIR-NBARC	31969504	31977881	-	motif_18,motif_15,motif_13,motif_1,motif_4,motif_4,motif_5,motif_5,motif_5,motif_10,motif_10,motif_10,motif_3,motif_3,motif_12,motif_7
3	NC_080043.1_nlr73	TIR-NBARC-LRR	31962937	31968671	-	motif_18,motif_15,motif_13,motif_1,motif_4,motif_4,motif_5,motif_5,motif_5,motif_10,motif_10,motif_10,motif_3,motif_3,motif_12,motif_7,motif_11,motif_11,motif_11,motif_11
3	NC_080043.1_nlr74	TIR-NBARC-LRR	31920661	31925557	-	motif_18,motif_15,motif_13,motif_1,motif_4,motif_4,motif_5,motif_5,motif_5,motif_10,motif_10,motif_10,motif_3,motif_3,motif_12,motif_7,motif_11,motif_11,motif_11,motif_11
3	NC_080043.1_nlr75	TIR-NBARC-LRR	31895529	31899438	-	motif_18,motif_15,motif_13,motif_1,motif_4,motif_4,motif_5,motif_5,motif_5,motif_10,motif_10,motif_10,motif_3,motif_3,motif_12,motif_7,motif_11,motif_11,motif_11
3	NC_080043.1_nlr76	TIR-NBARC	31890596	31892550	-	motif_18,motif_15,motif_13,motif_1,motif_4,motif_4,motif_5,motif_5,motif_5,motif_10,motif_10,motif_3,motif_7
3	NC_080043.1_nlr77	TIR-NBARC-LRR	31886612	31890275	-	motif_18,motif_15,motif_13,motif_10,motif_3,motif_12,motif_7,motif_11
3	NC_080043.1_nlr78	TIR-NBARC-LRR	31839132	31843248	-	motif_18,motif_15,motif_13,motif_1,motif_4,motif_4,motif_5,motif_5,motif_5,motif_10,motif_10,motif_10,motif_3,motif_3,motif_12,motif_7,motif_11,motif_11,motif_11,motif_11
3	NC_080043.1_nlr79	TIR-NBARC-LRR	31827220	31831161	-	motif_18,motif_15,motif_13,motif_1,motif_4,motif_4,motif_5,motif_5,motif_5,motif_10,motif_10,motif_10,motif_3,motif_3,motif_12,motif_7,motif_11,motif_11,motif_11,motif_11
3	NC_080043.1_nlr80	TIR-NBARC-LRR	31793916	31799280	-	motif_18,motif_15,motif_13,motif_1,motif_4,motif_4,motif_5,motif_5,motif_5,motif_10,motif_10,motif_10,motif_3,motif_3,motif_12,motif_7,motif_11,motif_11,motif_11,motif_11
3	NC_080043.1_nlr81	NBARC-LRR	31771888	31773787	-	motif_1,motif_4,motif_4,motif_5,motif_5,motif_5,motif_10,motif_10,motif_10,motif_3,motif_3,motif_12,motif_7,motif_11,motif_11
3	NC_080043.1_nlr82	TIR-NBARC-LRR	30113873	30119492	-	motif_18,motif_15,motif_13,motif_1,motif_4,motif_4,motif_5,motif_5,motif_5,motif_10,motif_10,motif_10,motif_3,motif_3,motif_12,motif_7,motif_11,motif_11,motif_11,motif_9,motif_9,motif_11,motif_11
3	NC_080043.1_nlr83	NBARC	27374566	27375433	-	motif_1,motif_4,motif_4,motif_5,motif_5,motif_5,motif_10,motif_10,motif_10,motif_3,motif_3,motif_12,motif_7
3	NC_080043.1_nlr84	TIR-NBARC-LRR	27370574	27374120	-	motif_18,motif_15,motif_13,motif_1,motif_4,motif_4,motif_5,motif_5,motif_5,motif_10,motif_10,motif_10,motif_3,motif_3,motif_12,motif_7,motif_11,motif_11,motif_11,motif_11
3	NC_080043.1_nlr85	NBARC	22352664	22352910	-	motif_5,motif_10,motif_3
3	NC_080043.1_nlr86	NBARC	19374369	19375230	-	motif_1,motif_4,motif_4,motif_5,motif_5,motif_5,motif_10,motif_10,motif_10,motif_3,motif_3,motif_12,motif_7
3	NC_080043.1_nlr87	TIR-NBARC-LRR	19370245	19374363	-	motif_18,motif_15,motif_13,motif_1,motif_4,motif_4,motif_5,motif_5,motif_5,motif_10,motif_10,motif_10,motif_3,motif_3,motif_12,motif_7,motif_11,motif_11,motif_11,motif_9
3	NC_080043.1_nlr88	CC-NBARC-LRR	13312259	13315682	-	motif_16,motif_1,motif_6,motif_6,motif_4,motif_4,motif_5,motif_5,motif_5,motif_10,motif_10,motif_10,motif_3,motif_3,motif_3,motif_12,motif_12,motif_12,motif_2,motif_2,motif_2,motif_8,motif_8,motif_7,motif_11,motif_9,motif_11,motif_9,motif_19,motif_11,motif_11,motif_11,motif_11,motif_11,motif_11,motif_11,motif_11,motif_11
3	NC_080043.1_nlr89	TIR-NBARC-LRR	13063721	13067271	-	motif_18,motif_15,motif_13,motif_1,motif_4,motif_4,motif_5,motif_5,motif_5,motif_10,motif_10,motif_10,motif_3,motif_3,motif_12,motif_7,motif_9,motif_11,motif_11,motif_11,motif_9,motif_11,motif_9,motif_11
3	NC_080043.1_nlr90	CC-NBARC-LRR	12939041	12943498	-	motif_17,motif_16,motif_1,motif_6,motif_6,motif_4,motif_4,motif_5,motif_5,motif_5,motif_10,motif_10,motif_10,motif_3,motif_3,motif_3,motif_12,motif_12,motif_12,motif_2,motif_2,motif_2,motif_8,motif_8,motif_7,motif_9,motif_9,motif_9,motif_11,motif_11,motif_9
3	NC_080043.1_nlr91	CC-NBARC-LRR	12935039	12937619	-	motif_17,motif_16,motif_1,motif_6,motif_6,motif_4,motif_4,motif_5,motif_5,motif_5,motif_10,motif_10,motif_10,motif_3,motif_3,motif_3,motif_12,motif_12,motif_12,motif_2,motif_2,motif_2,motif_8,motif_8,motif_7,motif_9,motif_9,motif_9,motif_11,motif_11
3	NC_080043.1_nlr92	CC-NBARC-LRR	12914818	12917350	-	motif_17,motif_16,motif_1,motif_6,motif_6,motif_4,motif_4,motif_5,motif_5,motif_5,motif_10,motif_10,motif_10,motif_3,motif_3,motif_3,motif_12,motif_12,motif_12,motif_2,motif_2,motif_2,motif_8,motif_8,motif_7,motif_9,motif_9,motif_9,motif_11
3	NC_080043.1_nlr93	CC-NBARC-LRR	12908575	12911697	-	motif_17,motif_16,motif_1,motif_6,motif_6,motif_4,motif_4,motif_5,motif_5,motif_5,motif_10,motif_10,motif_10,motif_3,motif_3,motif_3,motif_12,motif_12,motif_12,motif_2,motif_2,motif_2,motif_8,motif_8,motif_7,motif_9,motif_9,motif_9,motif_11
3	NC_080043.1_nlr94	CC-NBARC-LRR	12903719	12906266	-	motif_17,motif_16,motif_1,motif_6,motif_6,motif_4,motif_4,motif_5,motif_5,motif_5,motif_10,motif_10,motif_10,motif_3,motif_3,motif_3,motif_12,motif_12,motif_12,motif_2,motif_2,motif_2,motif_8,motif_8,motif_7,motif_9,motif_9,motif_11
3	NC_080043.1_nlr95	TIR-NBARC-LRR	12509113	12511807	-	motif_15,motif_13,motif_1,motif_4,motif_4,motif_5,motif_5,motif_5,motif_10,motif_10,motif_10,motif_3,motif_3,motif_12,motif_7,motif_11,motif_11,motif_11,motif_11,motif_9
3	NC_080043.1_nlr96	TIR-NBARC-LRR	10274878	10278798	-	motif_18,motif_15,motif_13,motif_1,motif_4,motif_4,motif_5,motif_5,motif_5,motif_10,motif_10,motif_10,motif_3,motif_3,motif_12,motif_7,motif_11,motif_11,motif_11,motif_9
3	NC_080043.1_nlr97	TIR-NBARC-LRR	10269481	10272371	-	motif_18,motif_15,motif_13,motif_1,motif_4,motif_5,motif_3,motif_7,motif_11,motif_11,motif_11,motif_11,motif_9
3	NC_080043.1_nlr98	TIR-NBARC	6013885	6016869	-	motif_18,motif_15,motif_13,motif_1,motif_4,motif_4,motif_5,motif_5,motif_5,motif_10,motif_10,motif_3
3	NC_080043.1_nlr99	TIR-NBARC-LRR	5995968	6001387	-	motif_18,motif_15,motif_13,motif_1,motif_4,motif_4,motif_5,motif_5,motif_5,motif_10,motif_10,motif_3,motif_7,motif_9,motif_11,motif_11,motif_11,motif_11,motif_11,motif_9,motif_11
3	NC_080043.1_nlr100	TIR-NBARC-LRR	5982840	5986273	-	motif_18,motif_15,motif_13,motif_1,motif_4,motif_4,motif_5,motif_5,motif_5,motif_10,motif_10,motif_10,motif_3,motif_3,motif_12,motif_7,motif_11,motif_11,motif_11,motif_11,motif_9,motif_11,motif_11,motif_9,motif_11
3	NC_080043.1_nlr101	TIR-NBARC-LRR	5971903	5975685	-	motif_18,motif_15,motif_13,motif_1,motif_4,motif_4,motif_5,motif_5,motif_5,motif_10,motif_10,motif_3,motif_7,motif_9,motif_11,motif_11,motif_11,motif_11,motif_11,motif_11
3	NC_080043.1_nlr102	TIR-NBARC-LRR	4847995	4851321	-	motif_18,motif_15,motif_13,motif_1,motif_4,motif_4,motif_5,motif_5,motif_5,motif_10,motif_10,motif_10,motif_3,motif_3,motif_12,motif_7,motif_11,motif_11,motif_11,motif_11,motif_11,motif_11,motif_11,motif_9,motif_9,motif_11
3	NC_080043.1_nlr103	CC-NBARC-LRR	3338679	3344379	-	motif_16,motif_1,motif_6,motif_6,motif_4,motif_4,motif_5,motif_5,motif_5,motif_10,motif_10,motif_10,motif_3,motif_3,motif_3,motif_12,motif_12,motif_12,motif_2,motif_2,motif_2,motif_8,motif_8,motif_7,motif_11,motif_9,motif_11,motif_9,motif_19,motif_11,motif_11,motif_11,motif_11,motif_19,motif_11,motif_11,motif_11,motif_11,motif_11,motif_9
3	NC_080043.1_nlr104	CC-NBARC-LRR	3334207	3336632	-	motif_17,motif_16,motif_1,motif_6,motif_6,motif_4,motif_4,motif_5,motif_5,motif_5,motif_10,motif_10,motif_10,motif_3,motif_3,motif_3,motif_12,motif_12,motif_12,motif_2,motif_2,motif_2,motif_8,motif_8,motif_7,motif_11,motif_9,motif_11,motif_9,motif_19,motif_11
3	NC_080043.1_nlr105	TIR-NBARC-LRR	2948579	2951951	-	motif_18,motif_15,motif_13,motif_1,motif_4,motif_4,motif_5,motif_5,motif_5,motif_10,motif_10,motif_10,motif_3,motif_3,motif_12,motif_7,motif_11,motif_11,motif_11,motif_11,motif_9,motif_11,motif_11,motif_9,motif_11
3	NC_080043.1_nlr106	TIR	1912183	1912543	-	motif_18,motif_15,motif_13
4	NC_080044.1_nlr1	NBARC-LRR	5790826	5792809	+	motif_1,motif_6,motif_6,motif_4,motif_4,motif_5,motif_5,motif_5,motif_10,motif_10,motif_10,motif_3,motif_3,motif_3,motif_12,motif_12,motif_12,motif_2,motif_2,motif_2,motif_8,motif_8,motif_7,motif_9,motif_11,motif_11,motif_11,motif_11
4	NC_080044.1_nlr2	TIR	7111500	7111857	+	motif_18,motif_15,motif_13
4	NC_080044.1_nlr3	NBARC-LRR	24717015	24722928	+	motif_1,motif_6,motif_6,motif_4,motif_4,motif_5,motif_5,motif_5,motif_10,motif_10,motif_10,motif_3,motif_3,motif_3,motif_12,motif_12,motif_2,motif_8,motif_7,motif_9,motif_11,motif_11,motif_11,motif_11,motif_11,motif_11,motif_11,motif_11,motif_11,motif_11,motif_9
4	NC_080044.1_nlr4	NBARC	82371491	82371833	+	motif_5,motif_10,motif_10,motif_3,motif_3,motif_12
4	NC_080044.1_nlr5	TIR-NBARC-LRR	82544820	82548806	+	motif_18,motif_15,motif_13,motif_5,motif_10,motif_10,motif_3,motif_3,motif_12,motif_7,motif_11,motif_11,motif_11,motif_11,motif_9,motif_11,motif_11,motif_11,motif_9,motif_11,motif_11,motif_9,motif_9,motif_9,motif_9,motif_11
4	NC_080044.1_nlr6	TIR-NBARC-LRR	82559537	82562664	+	motif_18,motif_15,motif_13,motif_1,motif_4,motif_4,motif_5,motif_5,motif_5,motif_10,motif_10,motif_10,motif_3,motif_3,motif_12,motif_7,motif_11,motif_11,motif_11,motif_9,motif_11,motif_9,motif_11
4	NC_080044.1_nlr7	TIR-NBARC-LRR	82567057	82570178	+	motif_18,motif_15,motif_13,motif_5,motif_10,motif_10,motif_3,motif_3,motif_12,motif_7,motif_11,motif_11,motif_11,motif_9,motif_11,motif_11,motif_9,motif_11,motif_11,motif_9,motif_11
4	NC_080044.1_nlr8	TIR-NBARC-LRR	82962894	82966712	-	motif_18,motif_15,motif_13,motif_1,motif_4,motif_4,motif_5,motif_5,motif_5,motif_10,motif_10,motif_10,motif_3,motif_3,motif_12,motif_7,motif_11,motif_11,motif_11,motif_11,motif_11,motif_9,motif_11,motif_11,motif_11,motif_9,motif_11,motif_11,motif_9,motif_11,motif_11
4	NC_080044.1_nlr9	TIR-NBARC-LRR	82586877	82590512	-	motif_18,motif_15,motif_13,motif_1,motif_4,motif_4,motif_5,motif_5,motif_5,motif_10,motif_10,motif_10,motif_3,motif_3,motif_12,motif_7,motif_11,motif_11,motif_11,motif_11,motif_9,motif_11,motif_11,motif_9,motif_11,motif_11,motif_9,motif_11
4	NC_080044.1_nlr10	CC-NBARC-LRR	68957740	68961992	-	motif_17,motif_1,motif_6,motif_6,motif_4,motif_4,motif_5,motif_5,motif_5,motif_10,motif_10,motif_10,motif_3,motif_3,motif_3,motif_12,motif_12,motif_12,motif_2,motif_2,motif_2,motif_8,motif_8,motif_7,motif_11,motif_9,motif_11,motif_11,motif_11,motif_11,motif_11,motif_9
4	NC_080044.1_nlr11	TIR-NBARC-LRR	66004101	66009450	-	motif_18,motif_15,motif_13,motif_4,motif_5,motif_5,motif_10,motif_10,motif_10,motif_3,motif_3,motif_12,motif_7,motif_11,motif_11,motif_11,motif_9,motif_11,motif_11,motif_11,motif_9,motif_11,motif_11,motif_9,motif_9,motif_9,motif_9,motif_11
4	NC_080044.1_nlr12	NBARC-LRR	44770184	44772049	-	motif_1,motif_6,motif_6,motif_4,motif_4,motif_5,motif_5,motif_5,motif_10,motif_10,motif_3,motif_2,motif_8,motif_7,motif_11,motif_19,motif_11
4	NC_080044.1_nlr13	NBARC-LRR	25564880	25567952	-	motif_1,motif_6,motif_6,motif_4,motif_4,motif_5,motif_5,motif_5,motif_10,motif_10,motif_10,motif_3,motif_3,motif_3,motif_12,motif_12,motif_12,motif_2,motif_2,motif_2,motif_8,motif_8,motif_7,motif_11,motif_9,motif_11,motif_9,motif_19,motif_11,motif_11,motif_11,motif_19,motif_11,motif_11,motif_11,motif_11,motif_11,motif_11
4	NC_080044.1_nlr14	TIR	18461725	18462082	-	motif_18,motif_15,motif_13
4	NC_080044.1_nlr15	TIR-NBARC-LRR	13482199	13486326	-	motif_18,motif_15,motif_13,motif_1,motif_4,motif_4,motif_5,motif_5,motif_5,motif_10,motif_10,motif_10,motif_3,motif_3,motif_12,motif_7,motif_11,motif_11,motif_11,motif_11,motif_11,motif_9,motif_11,motif_11,motif_9,motif_11,motif_11,motif_9,motif_11
4	NC_080044.1_nlr16	NBARC-LRR	6077621	6079601	-	motif_1,motif_6,motif_6,motif_4,motif_4,motif_5,motif_5,motif_5,motif_10,motif_10,motif_10,motif_3,motif_3,motif_3,motif_12,motif_12,motif_12,motif_2,motif_2,motif_2,motif_8,motif_8,motif_7,motif_9,motif_11,motif_11,motif_11,motif_11
4	NC_080044.1_nlr17	CC-NBARC-LRR	3251949	3254427	-	motif_17,motif_16,motif_1,motif_6,motif_6,motif_4,motif_4,motif_5,motif_5,motif_5,motif_10,motif_10,motif_10,motif_3,motif_3,motif_3,motif_12,motif_12,motif_12,motif_2,motif_2,motif_2,motif_8,motif_8,motif_7,motif_9,motif_11,motif_11,motif_11,motif_11,motif_11,motif_11,motif_11,motif_11
5	NC_080045.1_nlr1	TIR-NBARC-LRR	3556455	3561966	+	motif_18,motif_15,motif_13,motif_1,motif_4,motif_4,motif_5,motif_5,motif_5,motif_10,motif_10,motif_10,motif_3,motif_3,motif_12,motif_7,motif_11,motif_11,motif_11,motif_9,motif_9,motif_11
5	NC_080045.1_nlr2	CC-NBARC-LRR	14535708	14538273	+	motif_16,motif_4,motif_3,motif_12,motif_12,motif_2,motif_2,motif_2,motif_8,motif_8,motif_7,motif_9
5	NC_080045.1_nlr3	NBARC-LRR	23463272	23465192	+	motif_1,motif_6,motif_6,motif_4,motif_4,motif_5,motif_5,motif_5,motif_10,motif_10,motif_10,motif_3,motif_3,motif_3,motif_12,motif_12,motif_12,motif_2,motif_2,motif_2,motif_8,motif_8,motif_7,motif_9,motif_9,motif_11
5	NC_080045.1_nlr4	TIR-NBARC-LRR	32190045	32194793	+	motif_18,motif_15,motif_13,motif_1,motif_4,motif_4,motif_5,motif_5,motif_5,motif_10,motif_10,motif_10,motif_3,motif_3,motif_12,motif_7,motif_11,motif_11,motif_11,motif_9,motif_11,motif_9,motif_11,motif_9,motif_11,motif_11
5	NC_080045.1_nlr5	TIR-NBARC-LRR	61257413	61261022	-	motif_18,motif_15,motif_13,motif_1,motif_4,motif_4,motif_5,motif_5,motif_5,motif_10,motif_10,motif_10,motif_3,motif_3,motif_12,motif_7,motif_11,motif_11,motif_9,motif_9,motif_11
5	NC_080045.1_nlr6	TIR-NBARC-LRR	54863508	54866295	-	motif_18,motif_15,motif_13,motif_1,motif_4,motif_4,motif_5,motif_5,motif_5,motif_10,motif_10,motif_10,motif_3,motif_3,motif_12,motif_7,motif_11,motif_11,motif_9,motif_9,motif_11
5	NC_080045.1_nlr7	NBARC	51568821	51569253	-	motif_1,motif_6,motif_6,motif_4,motif_4,motif_5,motif_5,motif_10
5	NC_080045.1_nlr8	TIR	51568302	51568662	-	motif_18,motif_15,motif_13
5	NC_080045.1_nlr9	TIR-NBARC-LRR	23387157	23390277	-	motif_18,motif_15,motif_13,motif_1,motif_4,motif_4,motif_5,motif_5,motif_5,motif_10,motif_10,motif_10,motif_3,motif_3,motif_12,motif_7,motif_11,motif_11,motif_11,motif_11,motif_9,motif_9,motif_11
5	NC_080045.1_nlr10	CC-NBARC-LRR	12917195	12920162	-	motif_16,motif_1,motif_6,motif_6,motif_4,motif_4,motif_5,motif_5,motif_5,motif_10,motif_10,motif_10,motif_3,motif_3,motif_3,motif_12,motif_12,motif_12,motif_2,motif_2,motif_2,motif_8,motif_8,motif_7,motif_9,motif_11,motif_9,motif_19,motif_11,motif_11,motif_11,motif_11,motif_11
5	NC_080045.1_nlr11	CC-NBARC-LRR	11397764	11401172	-	motif_16,motif_1,motif_6,motif_6,motif_4,motif_4,motif_5,motif_5,motif_5,motif_10,motif_10,motif_10,motif_3,motif_3,motif_3,motif_12,motif_12,motif_12,motif_2,motif_2,motif_2,motif_8,motif_8,motif_7,motif_9,motif_11,motif_9,motif_19,motif_11,motif_11,motif_11,motif_11,motif_11,motif_11,motif_11,motif_11,motif_11,motif_11
5	NC_080045.1_nlr12	CC-NBARC-LRR	9687007	9690100	-	motif_17,motif_16,motif_1,motif_6,motif_6,motif_4,motif_4,motif_5,motif_5,motif_5,motif_10,motif_10,motif_10,motif_3,motif_3,motif_3,motif_12,motif_12,motif_12,motif_2,motif_2,motif_2,motif_8,motif_8,motif_7,motif_9,motif_11,motif_11,motif_11,motif_11,motif_11,motif_11,motif_11,motif_11
5	NC_080045.1_nlr13	TIR-NBARC-LRR	8015361	8017656	-	motif_15,motif_13,motif_4,motif_5,motif_5,motif_10,motif_10,motif_10,motif_3,motif_3,motif_12,motif_7,motif_11,motif_11,motif_11,motif_11
6	NC_080046.1_nlr1	CC-NBARC-LRR	834874	837772	+	motif_16,motif_1,motif_6,motif_6,motif_4,motif_4,motif_5,motif_5,motif_5,motif_10,motif_10,motif_10,motif_3,motif_3,motif_3,motif_12,motif_12,motif_12,motif_2,motif_2,motif_2,motif_8,motif_8,motif_7,motif_9,motif_9,motif_11,motif_9,motif_19,motif_11,motif_11,motif_11,motif_11,motif_11
6	NC_080046.1_nlr2	TIR	12665394	12665766	+	motif_18,motif_15,motif_13
6	NC_080046.1_nlr3	NBARC-LRR	12866978	12871822	+	motif_4,motif_5,motif_10,motif_12,motif_7,motif_11,motif_9,motif_11,motif_11,motif_9,motif_11
6	NC_080046.1_nlr4	TIR-NBARC	12870287	12871356	+	motif_13,motif_1,motif_5,motif_10,motif_3,motif_7
6	NC_080046.1_nlr5	CC-NBARC-LRR	13319620	13323121	+	motif_17,motif_16,motif_1,motif_6,motif_6,motif_4,motif_4,motif_5,motif_5,motif_5,motif_10,motif_10,motif_10,motif_3,motif_3,motif_3,motif_12,motif_12,motif_12,motif_2,motif_2,motif_2,motif_8,motif_8,motif_7,motif_11,motif_9,motif_11,motif_9,motif_19,motif_11,motif_11,motif_11,motif_11,motif_11,motif_11
6	NC_080046.1_nlr6	CC-NBARC-LRR	13347160	13350658	+	motif_17,motif_16,motif_1,motif_6,motif_6,motif_4,motif_4,motif_5,motif_5,motif_5,motif_10,motif_10,motif_10,motif_3,motif_3,motif_3,motif_12,motif_12,motif_12,motif_2,motif_2,motif_2,motif_8,motif_8,motif_7,motif_11,motif_9,motif_11,motif_9,motif_19,motif_11,motif_11,motif_11,motif_11,motif_11,motif_11,motif_11
6	NC_080046.1_nlr7	TIR	20471735	20472095	+	motif_18,motif_15,motif_13
6	NC_080046.1_nlr8	TIR-NBARC	23114281	23115843	+	motif_18,motif_15,motif_13,motif_1,motif_4,motif_4,motif_5,motif_5,motif_5,motif_10,motif_10,motif_10,motif_3,motif_3,motif_12,motif_7
6	NC_080046.1_nlr9	TIR-NBARC	23133079	23134979	+	motif_18,motif_15,motif_13,motif_1,motif_4,motif_4,motif_5,motif_5,motif_5,motif_10,motif_10,motif_3,motif_7
6	NC_080046.1_nlr10	NBARC	38440174	38441050	+	motif_1,motif_4,motif_4,motif_5,motif_5,motif_5,motif_10,motif_10,motif_10,motif_3,motif_3,motif_12,motif_7
6	NC_080046.1_nlr11	TIR-NBARC-LRR	38441056	38446235	+	motif_18,motif_15,motif_13,motif_1,motif_4,motif_4,motif_5,motif_5,motif_5,motif_10,motif_10,motif_10,motif_3,motif_3,motif_12,motif_7,motif_11,motif_11,motif_11,motif_11,motif_9
6	NC_080046.1_nlr12	NBARC-LRR	42377890	42379900	+	motif_1,motif_6,motif_6,motif_4,motif_4,motif_5,motif_5,motif_5,motif_10,motif_10,motif_10,motif_3,motif_3,motif_3,motif_12,motif_12,motif_12,motif_2,motif_2,motif_2,motif_8,motif_8,motif_7,motif_9,motif_11
6	NC_080046.1_nlr13	CC-NBARC-LRR	42430730	42433289	+	motif_17,motif_16,motif_1,motif_6,motif_6,motif_4,motif_4,motif_5,motif_5,motif_5,motif_10,motif_10,motif_10,motif_3,motif_3,motif_3,motif_12,motif_12,motif_12,motif_2,motif_2,motif_2,motif_8,motif_8,motif_7,motif_9,motif_9,motif_11,motif_11
6	NC_080046.1_nlr14	CC-NBARC-LRR	42437440	42440625	+	motif_17,motif_16,motif_1,motif_6,motif_6,motif_4,motif_4,motif_5,motif_5,motif_5,motif_10,motif_10,motif_10,motif_3,motif_3,motif_3,motif_12,motif_12,motif_12,motif_2,motif_2,motif_2,motif_8,motif_8,motif_7,motif_9,motif_9,motif_11
6	NC_080046.1_nlr15	CC-NBARC-LRR	42693277	42695764	+	motif_17,motif_16,motif_1,motif_6,motif_6,motif_4,motif_4,motif_5,motif_5,motif_5,motif_10,motif_10,motif_10,motif_3,motif_3,motif_3,motif_12,motif_12,motif_12,motif_2,motif_2,motif_2,motif_8,motif_8,motif_7,motif_9,motif_11,motif_11
6	NC_080046.1_nlr16	CC-NBARC-LRR	42716598	42721110	+	motif_17,motif_16,motif_1,motif_6,motif_10,motif_3,motif_3,motif_12,motif_12,motif_12,motif_2,motif_2,motif_2,motif_8,motif_8,motif_7,motif_19,motif_11,motif_11,motif_11
6	NC_080046.1_nlr17	NBARC-LRR	45104439	45105627	+	motif_12,motif_2,motif_8,motif_11,motif_11,motif_19
6	NC_080046.1_nlr18	TIR-NBARC-LRR	48914673	48918193	+	motif_18,motif_15,motif_13,motif_1,motif_4,motif_4,motif_5,motif_5,motif_5,motif_10,motif_10,motif_10,motif_3,motif_3,motif_12,motif_7,motif_11,motif_11,motif_11,motif_11,motif_9,motif_11,motif_11,motif_11,motif_11,motif_11
6	NC_080046.1_nlr19	TIR-NBARC-LRR	49801042	49804297	+	motif_18,motif_15,motif_13,motif_1,motif_4,motif_4,motif_5,motif_5,motif_5,motif_10,motif_10,motif_10,motif_3,motif_3,motif_12,motif_7,motif_11,motif_11,motif_11,motif_11,motif_9,motif_11,motif_11,motif_11,motif_9,motif_11
6	NC_080046.1_nlr20	CC-NBARC-LRR	54240702	54243987	+	motif_17,motif_16,motif_1,motif_6,motif_6,motif_4,motif_4,motif_5,motif_5,motif_10,motif_3,motif_12,motif_12,motif_2,motif_2,motif_2,motif_8,motif_8,motif_7,motif_9,motif_11,motif_11
6	NC_080046.1_nlr21	CC-NBARC-LRR	58085216	58088576	+	motif_16,motif_1,motif_6,motif_6,motif_4,motif_4,motif_5,motif_5,motif_5,motif_10,motif_10,motif_10,motif_3,motif_3,motif_3,motif_12,motif_12,motif_12,motif_2,motif_2,motif_2,motif_8,motif_8,motif_7,motif_9,motif_11,motif_9,motif_19,motif_11,motif_11,motif_11,motif_11,motif_11,motif_11,motif_11,motif_11,motif_11
6	NC_080046.1_nlr22	CC-NBARC-LRR	64232524	64238302	+	motif_16,motif_1,motif_6,motif_6,motif_4,motif_4,motif_5,motif_5,motif_5,motif_10,motif_10,motif_10,motif_3,motif_3,motif_3,motif_12,motif_12,motif_12,motif_2,motif_2,motif_2,motif_8,motif_8,motif_7,motif_9,motif_11,motif_9,motif_19,motif_11,motif_11,motif_11,motif_11,motif_11,motif_11,motif_11,motif_11,motif_11,motif_11,motif_11,motif_11
6	NC_080046.1_nlr23	CC-NBARC-LRR	64272519	64275348	+	motif_17,motif_16,motif_1,motif_6,motif_6,motif_4,motif_4,motif_5,motif_5,motif_5,motif_10,motif_10,motif_10,motif_3,motif_3,motif_3,motif_12,motif_12,motif_12,motif_2,motif_2,motif_2,motif_8,motif_8,motif_7,motif_11,motif_9,motif_11,motif_9,motif_19,motif_11,motif_11,motif_11,motif_11
6	NC_080046.1_nlr24	CC-NBARC-LRR	64756578	64760190	+	motif_17,motif_16,motif_1,motif_6,motif_6,motif_4,motif_4,motif_5,motif_5,motif_5,motif_10,motif_10,motif_10,motif_3,motif_3,motif_3,motif_12,motif_12,motif_12,motif_2,motif_2,motif_2,motif_8,motif_8,motif_7,motif_9,motif_11,motif_9,motif_19,motif_11,motif_11,motif_11,motif_11,motif_11,motif_11,motif_11,motif_11,motif_11,motif_11,motif_11
6	NC_080046.1_nlr25	TIR-NBARC-LRR	66152399	66155639	+	motif_18,motif_1,motif_6,motif_4,motif_10,motif_9,motif_9,motif_9,motif_11,motif_11,motif_11,motif_11,motif_11
6	NC_080046.1_nlr26	TIR-NBARC-LRR	66426490	66431005	-	motif_18,motif_1,motif_6,motif_6,motif_4,motif_4,motif_5,motif_5,motif_5,motif_10,motif_10,motif_3,motif_7,motif_11,motif_9,motif_9,motif_11,motif_11,motif_11,motif_11,motif_11,motif_11,motif_11,motif_11
6	NC_080046.1_nlr27	CC-NBARC-LRR	59756914	59759443	-	motif_17,motif_1,motif_6,motif_6,motif_4,motif_4,motif_5,motif_5,motif_5,motif_10,motif_10,motif_10,motif_3,motif_3,motif_12,motif_2,motif_8,motif_7,motif_9,motif_9,motif_11,motif_11,motif_11
6	NC_080046.1_nlr28	NBARC-LRR	59749037	59751057	-	motif_1,motif_6,motif_6,motif_4,motif_4,motif_5,motif_5,motif_5,motif_10,motif_10,motif_10,motif_3,motif_3,motif_3,motif_12,motif_12,motif_12,motif_2,motif_2,motif_2,motif_8,motif_8,motif_7,motif_9,motif_9,motif_11
6	NC_080046.1_nlr29	CC-NBARC-LRR	58451689	58455037	-	motif_16,motif_1,motif_6,motif_6,motif_4,motif_4,motif_5,motif_5,motif_5,motif_10,motif_10,motif_10,motif_3,motif_3,motif_3,motif_12,motif_12,motif_12,motif_2,motif_2,motif_2,motif_8,motif_8,motif_7,motif_9,motif_11,motif_9,motif_19,motif_11,motif_11,motif_11,motif_11,motif_11,motif_11,motif_11,motif_11,motif_11
6	NC_080046.1_nlr30	TIR-NBARC	49227822	49229451	-	motif_18,motif_15,motif_13,motif_1,motif_4,motif_4,motif_5,motif_5,motif_5,motif_10,motif_10,motif_10,motif_3,motif_3,motif_12,motif_7
6	NC_080046.1_nlr31	TIR-NBARC-LRR	49073806	49078814	-	motif_18,motif_15,motif_13,motif_1,motif_4,motif_4,motif_5,motif_5,motif_5,motif_10,motif_10,motif_10,motif_3,motif_3,motif_12,motif_7,motif_9,motif_11,motif_11,motif_11,motif_11,motif_9,motif_11,motif_9,motif_11
6	NC_080046.1_nlr32	NBARC-LRR	49063238	49068287	-	motif_1,motif_6,motif_6,motif_4,motif_4,motif_5,motif_5,motif_5,motif_10,motif_10,motif_10,motif_3,motif_3,motif_3,motif_12,motif_12,motif_2,motif_7,motif_11,motif_11,motif_11,motif_11,motif_11,motif_11,motif_11,motif_11,motif_11,motif_11,motif_11,motif_11
6	NC_080046.1_nlr33	NBARC-LRR	48073864	48075646	-	motif_1,motif_6,motif_6,motif_4,motif_4,motif_5,motif_5,motif_5,motif_10,motif_10,motif_10,motif_3,motif_3,motif_3,motif_12,motif_12,motif_12,motif_2,motif_2,motif_2,motif_8,motif_8,motif_7,motif_11,motif_9,motif_11,motif_9,motif_19
6	NC_080046.1_nlr34	NBARC-LRR	48058975	48063436	-	motif_1,motif_6,motif_10,motif_3,motif_3,motif_12,motif_12,motif_12,motif_2,motif_2,motif_2,motif_8,motif_8,motif_7,motif_9,motif_11,motif_9,motif_11,motif_11,motif_9,motif_11,motif_9
6	NC_080046.1_nlr35	NBARC	48059434	48059857	-	motif_3,motif_12,motif_12,motif_2,motif_2,motif_2,motif_8,motif_8,motif_7
6	NC_080046.1_nlr36	TIR-NBARC-LRR	47676449	47679355	-	motif_18,motif_15,motif_13,motif_1,motif_4,motif_4,motif_5,motif_5,motif_5,motif_10,motif_10,motif_10,motif_3,motif_3,motif_12,motif_7,motif_9,motif_11,motif_11,motif_11,motif_11,motif_9,motif_11
6	NC_080046.1_nlr37	TIR-NBARC-LRR	47663521	47666483	-	motif_18,motif_15,motif_13,motif_1,motif_4,motif_4,motif_5,motif_5,motif_5,motif_10,motif_10,motif_10,motif_3,motif_3,motif_12,motif_7,motif_11,motif_11,motif_11,motif_9,motif_11
6	NC_080046.1_nlr38	CC-NBARC-LRR	47004420	47008057	-	motif_16,motif_1,motif_6,motif_6,motif_4,motif_4,motif_5,motif_5,motif_5,motif_10,motif_10,motif_10,motif_3,motif_3,motif_3,motif_12,motif_12,motif_12,motif_2,motif_2,motif_2,motif_8,motif_8,motif_7,motif_9,motif_9,motif_11,motif_9,motif_19,motif_11,motif_11,motif_11,motif_11,motif_11,motif_11,motif_11,motif_11
6	NC_080046.1_nlr39	NBARC	45120265	45120895	-	motif_1,motif_4,motif_5,motif_3
6	NC_080046.1_nlr40	NBARC	45118109	45118739	-	motif_1,motif_4,motif_5,motif_3
6	NC_080046.1_nlr41	CC-NBARC-LRR	42632190	42634782	-	motif_17,motif_16,motif_1,motif_6,motif_6,motif_4,motif_4,motif_5,motif_5,motif_5,motif_10,motif_10,motif_10,motif_3,motif_3,motif_3,motif_12,motif_12,motif_12,motif_2,motif_2,motif_2,motif_8,motif_8,motif_7,motif_9,motif_9,motif_11,motif_11
6	NC_080046.1_nlr42	CC-NBARC-LRR	42608474	42610231	-	motif_16,motif_1,motif_6,motif_6,motif_4,motif_4,motif_5,motif_5,motif_5,motif_10,motif_10,motif_10,motif_3,motif_3,motif_3,motif_12,motif_12,motif_12,motif_2,motif_2,motif_2,motif_8,motif_8,motif_7,motif_9,motif_9
6	NC_080046.1_nlr43	NBARC-LRR	42600199	42602114	-	motif_1,motif_6,motif_6,motif_4,motif_4,motif_5,motif_5,motif_5,motif_10,motif_10,motif_10,motif_3,motif_3,motif_3,motif_12,motif_12,motif_12,motif_2,motif_2,motif_8,motif_9,motif_9,motif_11
6	NC_080046.1_nlr44	TIR	23437813	23438173	-	motif_18,motif_15,motif_13

## Sheet: HAPk Windows
Chromosome	Position	Start	End	n_SNPs	n_genes	GC	Unique_haplotypes	Heterozygosity_fraction	V2	V3	V4	V5	V6	V7	V8	HAPk	TajimasD	Pi	Fst	DP	RSQ	Betascan_stat	n_sweeping_haplotypes	Sweep_width	Saltilassi_statistic	Bacterial_GWAS	Other_GWAS	NLR	Mantel
1	254004	204004	304004	141	3	0.37107	205	0.0351042	0.387189	0.615078	0.677206	0.729647	0.770278	0.809295	0.829474	0.31169	-0.874588	0.000481202	0.214228	0.808363	0.153459	0.673767	3.86111	587.93	5.97797	FALSE	FALSE	FALSE	0.0219622208616061
1	354004	304004	404004	150	8	0.37569	147	0.0218449	0.426869	0.639724	0.707741	0.763606	0.80606	0.828889	0.844237	0.283268	-1.12161	0.000599142	0.264023	0.894877	0.192453	0.473578	4.34211	526.146	3.02674	FALSE	FALSE	FALSE	0.0309556622106001
1	454004	404004	504004	147	5	0.36372	166	0.0243871	0.382263	0.661061	0.724101	0.769572	0.809129	0.834318	0.854674	0.280698	-0.97888	0.00060291	0.237097	0.888243	0.187312	0.691104	3.5	120.855	1.63991	FALSE	FALSE	FALSE	0.0333397308503311
1	554004	504004	604004	160	6	0.3568	182	0.0203223	0.27935	0.489277	0.57496	0.657145	0.705285	0.739759	0.763148	0.398725	-1.29828	0.000651101	0.206285	0.788305	0.129004	0.558697	3.61538	429.664	1.73989	FALSE	FALSE	FALSE	0.0342975922302713
1	654004	604004	704004	241	11	0.3595	165	0.0182677	0.531115	0.640057	0.713679	0.755702	0.779598	0.796611	0.812644	0.281514	-0.635483	0.000880221	0.166726	0.806703	0.247868	1.59215	3.50413	4479.58	799.219	FALSE	FALSE	FALSE	0.0356555909168146
1	754004	704004	804004	150	13	0.39476	215	0.0346331	0.366472	0.513565	0.581242	0.623703	0.662983	0.696141	0.723311	0.404655	-0.642359	0.000539816	0.133602	0.716604	0.120048	0.473476	2.27027	49.3665	1.09024	FALSE	FALSE	FALSE	0.0418270268416623
1	854004	804004	904004	163	17	0.35305	164	0.0190608	0.240944	0.417556	0.492189	0.531755	0.569659	0.604792	0.633706	0.501343	-1.13909	0.000604761	0.203222	0.652497	0.095636	4.38309	3.43902	1346.83	71.0356	FALSE	FALSE	FALSE	0.0422089565422717
1	954004	904004	1004004	158	10	0.3671	174	0.0175145	0.334969	0.497434	0.590555	0.653903	0.698509	0.736026	0.769379	0.388461	-1.43522	0.000651285	0.218463	0.80066	0.14095	0.632077	4.11111	2488.9	32.5189	FALSE	FALSE	FALSE	0.0485083117197842
1	1054004	1004004	1104004	181	15	0.36049	182	0.0250182	0.256245	0.44115	0.532885	0.588465	0.632953	0.672701	0.691986	0.454802	-1.0748	0.000729577	0.237516	0.680057	0.116558	0.704027	3.61538	457.952	16.4791	FALSE	FALSE	FALSE	0.0504744990261433
1	1154004	1104004	1204004	134	8	0.35472	142	0.0249226	0.267621	0.433961	0.513408	0.578475	0.636497	0.675441	0.701822	0.456111	-1.36804	0.000567706	0.163561	0.71804	0.111825	0.413179	4.03077	484.589	6.10818	TRUE	FALSE	FALSE	0.05071455062955
1	1254004	1204004	1304004	159	13	0.3586	247	0.0361141	0.234627	0.349801	0.418916	0.469659	0.512102	0.544097	0.563575	0.558175	-0.95813	0.000626206	0.209386	0.554737	0.0833802	0.658005	2.20988	236.275	32.8917	FALSE	FALSE	TRUE	0.0510939109441134
1	1354004	1304004	1404004	170	10	0.36064	167	0.027303	0.441223	0.535802	0.603595	0.670539	0.692479	0.711633	0.733392	0.373048	-0.673243	0.000762824	0.304752	0.681528	0.174623	2.79837	3.25301	972.957	199.073	FALSE	FALSE	FALSE	0.0525590570980945
1	1454004	1404004	1504004	216	7	0.35443	235	0.0284766	0.265912	0.447138	0.556672	0.60897	0.647537	0.679256	0.702928	0.441655	-0.927758	0.000833306	0.179037	0.684457	0.114532	1.96272	3.66364	362.774	10.2254	FALSE	FALSE	FALSE	0.0530026078224734
1	1554004	1504004	1604004	153	8	0.38385	227	0.0285691	0.253928	0.427945	0.522055	0.578865	0.627974	0.663597	0.695891	0.461392	-1.36204	0.00057207	0.150733	0.696388	0.096229	0.821859	2.76316	114.69	2.1906	FALSE	FALSE	FALSE	0.0538416678647111
1	1654004	1604004	1704004	126	5	0.35977	138	0.0187182	0.286799	0.451871	0.517512	0.579456	0.637494	0.67187	0.705299	0.449957	-1.70831	0.000422643	0.169709	0.811616	0.0994074	0.0834812	8.03175	21834.6	7.65891	FALSE	FALSE	FALSE	0.0549337568432163
1	1754004	1704004	1804004	156	7	0.37571	169	0.015683	0.286078	0.453536	0.550911	0.608838	0.666274	0.704894	0.73854	0.427276	-1.82394	0.000514679	0.123401	0.77239	0.129236	0.173379	6.81818	65906	64.2881	FALSE	FALSE	FALSE	0.0564468082255077
1	1854004	1804004	1904004	99	6	0.37047	102	0.0144209	0.436374	0.552882	0.655189	0.742766	0.796743	0.835368	0.859989	0.302956	-1.89381	0.000359509	0.182337	0.939622	0.139854	0.0753908	7.60784	159637	49.7198	FALSE	FALSE	FALSE	0.0575182564850316
1	1954004	1904004	2004004	93	11	0.37133	158	0.0160952	0.417484	0.504646	0.58907	0.645998	0.676715	0.698095	0.714048	0.393421	-2.01821	0.000382309	0.181533	0.817495	0.109529	0.42162	4.56522	3675.04	21.2372	FALSE	FALSE	FALSE	0.0585421288246952
1	2054004	2004004	2104004	138	9	0.38457	168	0.0159967	0.293775	0.39777	0.487646	0.534505	0.579018	0.615294	0.646038	0.492279	-1.7561	0.000449686	0.146569	0.785606	0.0852979	0.250856	4.63235	863.162	5.51001	FALSE	FALSE	TRUE	0.060316699603143
1	2154004	2104004	2204004	307	14	0.35946	240	0.027718	0.183033	0.317769	0.412256	0.476992	0.534293	0.572373	0.601061	0.55746	-0.808508	0.00103467	0.0986822	0.604713	0.0997457	2.88815	3.57143	1570.25	710.519	FALSE	FALSE	FALSE	0.0611834795495543
1	2254004	2204004	2304004	192	9	0.37581	216	0.0239125	0.257331	0.41011	0.476874	0.534137	0.580838	0.624489	0.655339	0.494412	-1.14427	0.000785852	0.161671	0.693534	0.108024	2.10134	3.03093	356.033	52.868	FALSE	FALSE	FALSE	0.061748470937766
1	2354004	2304004	2404004	132	7	0.37941	277	0.0523633	0.405677	0.486322	0.541754	0.586321	0.623734	0.646697	0.661574	0.435417	-1.70024	0.000499376	0.159885	0.595259	0.0894323	0.169826	3.11111	1100.07	40.8153	FALSE	FALSE	FALSE	0.0627172760721419
1	2454004	2404004	2504004	153	10	0.34455	230	0.028158	0.378698	0.478595	0.523874	0.559721	0.590427	0.615338	0.639014	0.45919	-1.42824	0.000613685	0.186694	0.599055	0.118942	1.12644	2.92405	1146.85	61.7273	FALSE	FALSE	FALSE	0.0629593699157913
1	2554004	2504004	2604004	133	9	0.36006	186	0.0245898	0.234632	0.421541	0.515866	0.572958	0.614072	0.646242	0.674169	0.47436	-1.3394	0.000544355	0.130035	0.652359	0.105031	0.68467	3.64179	1072.91	10.6981	FALSE	FALSE	FALSE	0.0631827120944746
1	2654004	2604004	2704004	224	9	0.35469	220	0.0243711	0.156783	0.242149	0.318349	0.380079	0.431407	0.461246	0.490468	0.645646	-1.31924	0.000755754	0.0794431	0.582189	0.0553039	1.5114	3.35714	593.924	17.2816	FALSE	FALSE	FALSE	0.0648231357425191
1	2754004	2704004	2804004	539	11	0.37139	300	0.0679689	0.240842	0.314271	0.38075	0.42985	0.463134	0.4861	0.514169	0.595841	0.289859	0.00210932	0.087693	0.415049	0.0643043	5.88616	2.37313	1613.91	577.761	FALSE	FALSE	FALSE	0.0650222054429751
1	2854004	2804004	2904004	361	10	0.35718	290	0.0465862	0.137162	0.236544	0.321992	0.390087	0.430683	0.464447	0.49721	0.645982	-0.29209	0.00130647	0.0839361	0.473781	0.0701975	2.53698	3.51934	1769.22	202.055	FALSE	FALSE	FALSE	0.0651947535011708
1	2954004	2904004	3004004	325	13	0.35171	280	0.0302854	0.484201	0.544848	0.58764	0.616923	0.643013	0.664894	0.681323	0.396737	-0.311761	0.00130948	0.0751115	0.610735	0.166946	6.45308	3.1227	3392.52	374.947	FALSE	FALSE	FALSE	0.0652660722547466
1	3054004	3004004	3104004	384	3	0.37424	249	0.0262055	0.328294	0.590413	0.648038	0.704246	0.75003	0.778287	0.797154	0.343362	0.0942083	0.00150159	0.135317	0.789059	0.173175	0.885612	5.01571	1102.55	25.1137	FALSE	FALSE	FALSE	0.0673869002506199
1	3154004	3104004	3204004	184	10	0.36149	192	0.0286095	0.206985	0.353701	0.413123	0.462929	0.505968	0.537799	0.564508	0.564998	-1.1022	0.00075611	0.140047	0.616859	0.0865847	0.838687	2.84783	172.869	10.3088	FALSE	FALSE	FALSE	0.068498920830546
1	3254004	3204004	3304004	198	7	0.35875	225	0.0270631	0.428958	0.511407	0.580065	0.644124	0.677133	0.701346	0.723774	0.390456	-1.10754	0.000658146	0.134076	0.769755	0.136406	1.68142	3.85859	2562.24	200.457	FALSE	FALSE	FALSE	0.0695725110465686
1	3354004	3304004	3404004	153	13	0.34961	205	0.0271303	0.245807	0.369007	0.450773	0.508413	0.556843	0.587384	0.6076	0.524882	-1.40509	0.000581459	0.187835	0.680867	0.0880819	0.418389	2.98718	204.918	1.90845	FALSE	FALSE	TRUE	0.0707821682559037
1	3454004	3404004	3504004	180	8	0.36029	150	0.021174	0.202069	0.373519	0.476193	0.565116	0.622895	0.672167	0.703109	0.483562	-1.53629	0.000567975	0.159554	0.781425	0.1146	0.489704	7.11111	31590.5	45.9896	FALSE	FALSE	FALSE	0.0722455102423424
1	3554004	3504004	3604004	78	2	0.38135	130	0.0542654	0.652242	0.725447	0.777501	0.798378	0.818184	0.834422	0.846287	0.221077	0.0541478	0.000415197	0.0999292	0.769349	0.363925	0.787715	5.575	150988	996.444	FALSE	FALSE	FALSE	0.0734158903937543
1	3654004	3604004	3704004	816	5	0.34707	253	0.0564342	0.766859	0.836661	0.848618	0.856261	0.863421	0.869733	0.875025	0.154774	2.00489	0.00354898	0.067651	0.873857	0.545835	7.04024	4	199999	12623.5	FALSE	FALSE	FALSE	0.0737207296527657
1	3754004	3704004	3804004	568	2	0.36576	283	0.0675879	0.697324	0.753397	0.786128	0.79726	0.80621	0.814758	0.823222	0.217386	0.873313	0.00222236	0.0649301	0.783142	0.393924	6.46852	4.36396	133002	5204.84	FALSE	FALSE	FALSE	0.074361021524171
1	3854004	3804004	3904004	438	4	0.37594	282	0.0767209	0.591829	0.662733	0.697427	0.732011	0.760862	0.776625	0.785987	0.284647	0.0629819	0.0017396	0.0888019	0.710814	0.2741	4.50889	4.09009	55697	1631.24	FALSE	FALSE	FALSE	0.0756260642427776
1	3954004	3904004	4004004	144	7	0.3906	136	0.0315776	0.5143	0.64269	0.738498	0.805133	0.836336	0.852755	0.862477	0.249687	-1.31868	0.000628293	0.221905	0.891694	0.252394	1.32812	5.71014	8242.85	63.6093	FALSE	FALSE	FALSE	0.0756693277569965
1	4054004	4004004	4104004	143	11	0.35634	187	0.0324141	0.326485	0.45956	0.511178	0.560385	0.602267	0.642887	0.668123	0.461302	-1.22846	0.000655115	0.228271	0.708933	0.143683	0.516999	2.875	755.129	15.6632	FALSE	FALSE	TRUE	0.075782685466579
1	4154004	4104004	4204004	156	7	0.3624	202	0.0554749	0.324323	0.486066	0.564514	0.624428	0.663307	0.696619	0.723371	0.416767	-1.21891	0.000663644	0.189602	0.733107	0.132458	0.790868	3.66234	229.683	3.71449	FALSE	FALSE	TRUE	0.0760587491572792
1	4254004	4204004	4304004	132	4	0.40127	159	0.0301124	0.54498	0.659406	0.738197	0.773889	0.801303	0.825071	0.847574	0.258511	-1.29855	0.000653975	0.209876	0.873575	0.251256	1.36742	4.1194	12855.8	272.757	FALSE	FALSE	TRUE	0.0763996245896012
1	4354004	4304004	4404004	229	7	0.387	138	0.0276565	0.529417	0.655532	0.743419	0.809836	0.836916	0.859737	0.87885	0.240899	-0.613627	0.000905368	0.268365	0.768634	0.332217	7.78318	2.71304	63533.9	8165.49	FALSE	FALSE	TRUE	0.0767520737227892
1	4454004	4404004	4504004	207	4	0.35934	233	0.0337557	0.492776	0.59691	0.698407	0.768457	0.803452	0.825349	0.846985	0.281095	-1.10407	0.000764621	0.195405	0.815742	0.226366	1.06822	5.24272	142617	2349.83	FALSE	FALSE	FALSE	0.0773028121590302
1	4554004	4504004	4604004	181	5	0.38572	168	0.0224469	0.341623	0.53139	0.600717	0.665578	0.708792	0.748422	0.781489	0.37457	-1.5542	0.000596968	0.137433	0.816569	0.15027	0.451596	6.51648	34960.6	13.6808	FALSE	FALSE	FALSE	0.0773839764267343
1	4654004	4604004	4704004	99	3	0.34339	153	0.0306842	0.383042	0.502383	0.587952	0.6402	0.692443	0.732974	0.754573	0.386633	-1.78337	0.000395194	0.166637	0.750805	0.115908	0.117769	5.74	53054.3	38.7223	FALSE	FALSE	FALSE	0.0780034577871596
1	4754004	4704004	4804004	110	4	0.37232	124	0.019211	0.29489	0.445322	0.594094	0.645754	0.687526	0.724801	0.760161	0.406779	-1.70893	0.000347198	0.135859	0.865895	0.131538	0.237485	6.60714	70629.6	50.6565	FALSE	FALSE	FALSE	0.0781080902778779
1	4854004	4804004	4904004	184	3	0.3755	158	0.0181501	0.254981	0.46709	0.565187	0.639145	0.67679	0.709908	0.745145	0.420251	-1.72494	0.000558956	0.137692	0.833091	0.105891	0.328087	7.49451	154514	57.6879	FALSE	FALSE	FALSE	0.0781604267185532
1	4954004	4904004	5004004	202	3	0.37218	163	0.0193972	0.293568	0.457725	0.548041	0.599767	0.647599	0.693342	0.736352	0.431944	-1.86697	0.0005827	0.156325	0.841768	0.123638	0.374355	7.41	110697	77.0033	FALSE	FALSE	FALSE	0.0781936620370979
1	5054004	5004004	5104004	146	8	0.37095	194	0.02182	0.2563	0.339238	0.407455	0.481623	0.541122	0.579881	0.624536	0.538549	-1.85677	0.000403026	0.0875231	0.778724	0.0874469	0.421718	6.70667	72937.9	18.6254	FALSE	FALSE	FALSE	0.078403577297569
1	5154004	5104004	5204004	123	7	0.36024	154	0.0278161	0.356619	0.510963	0.597431	0.671036	0.710588	0.740178	0.755673	0.379645	-1.66525	0.000509853	0.176035	0.811117	0.163221	0.41626	3.32759	201.034	5.76063	FALSE	FALSE	FALSE	0.0789327695654254
1	5254004	5204004	5304004	146	9	0.37562	218	0.0330835	0.306298	0.470919	0.55383	0.603952	0.636996	0.666519	0.696224	0.437894	-1.74582	0.000534008	0.163439	0.745253	0.105736	0.635482	3.71622	523.658	7.45621	FALSE	FALSE	FALSE	0.0805563003604538
1	5354004	5304004	5404004	271	9	0.34837	235	0.0274695	0.260682	0.446904	0.523128	0.585819	0.6333	0.666381	0.686515	0.456753	-1.18338	0.000966311	0.169989	0.713738	0.105245	0.45799	4.54412	3560.56	66.6896	FALSE	FALSE	TRUE	0.0819127768489007
1	5454004	5404004	5504004	129	8	0.3773	200	0.0258398	0.332789	0.496094	0.556515	0.609207	0.639734	0.669481	0.696119	0.42858	-1.89511	0.000487905	0.180513	0.774939	0.110472	0.235124	4.75758	2711.82	18.9008	FALSE	FALSE	TRUE	0.0821965042224146
1	5554004	5504004	5604004	192	9	0.35854	197	0.0180818	0.422482	0.572169	0.632607	0.68821	0.714023	0.734363	0.747314	0.355548	-1.73597	0.00072262	0.233554	0.831445	0.167838	0.910141	4.09574	3213.14	325.673	FALSE	FALSE	TRUE	0.0826530960126797
1	5654004	5604004	5704004	141	11	0.37574	248	0.0283242	0.209688	0.361278	0.487415	0.54933	0.588508	0.627092	0.647517	0.504168	-1.83134	0.000493949	0.159068	0.771168	0.0997666	0.359869	3.38028	528.68	2.46755	FALSE	FALSE	FALSE	0.0835201716640566
1	5754004	5704004	5804004	57	6	0.37982	174	0.0374048	0.17197	0.331645	0.447412	0.543295	0.598467	0.626743	0.648299	0.518881	-1.84104	0.000201709	0.150875	0.733876	0.0760255	0.268469	1.31034	83.3534	0.368958	FALSE	FALSE	FALSE	0.083543318144699
1	5854004	5804004	5904004	241	10	0.36547	191	0.0282366	0.317745	0.465427	0.529707	0.586433	0.620827	0.64551	0.665565	0.452684	-0.919555	0.000976177	0.199085	0.671986	0.122966	3.22021	3.8843	4333.01	399.278	FALSE	FALSE	FALSE	0.0842862040497298
1	5954004	5904004	6004004	199	11	0.38053	201	0.0272115	0.25861	0.343383	0.416811	0.482331	0.513177	0.536517	0.555888	0.556183	-1.11654	0.000714203	0.129565	0.60499	0.0938436	1.1844	2.8	463.885	171.362	FALSE	FALSE	FALSE	0.0843391716110692
1	6054004	6004004	6104004	183	7	0.37304	172	0.0216861	0.234377	0.380783	0.481159	0.561559	0.612399	0.657103	0.684901	0.48396	-0.321154	0.000699311	0.195936	0.709808	0.110362	2.29379	4.19318	347.042	12.8493	FALSE	FALSE	TRUE	0.0846883850413306
1	6154004	6104004	6204004	232	5	0.37646	235	0.0194643	0.177099	0.297656	0.378007	0.452004	0.499832	0.546765	0.577449	0.581598	-1.26491	0.000751005	0.136178	0.721885	0.0702728	0.680657	2.875	168.149	5.69597	FALSE	FALSE	TRUE	0.0853636240696671
1	6254004	6204004	6304004	267	7	0.38363	237	0.0295621	0.36123	0.488566	0.537974	0.575385	0.606375	0.638098	0.662183	0.44717	-0.486148	0.00105448	0.115292	0.612957	0.119922	0.919276	2.85821	262.803	13.3817	FALSE	FALSE	TRUE	0.0858444175421019
1	6354004	6304004	6404004	186	12	0.34233	190	0.0200514	0.172721	0.308803	0.372852	0.433475	0.486112	0.524776	0.55871	0.591793	-1.0322	0.000623887	0.0908626	0.643659	0.0706246	0.683965	2.51648	294.9	15.2347	FALSE	FALSE	FALSE	0.086315077108482
1	6454004	6404004	6504004	182	5	0.38339	194	0.0229802	0.191549	0.309508	0.398925	0.466125	0.528592	0.566723	0.598919	0.562809	-0.690499	0.000658353	0.115693	0.645345	0.0859043	0.461185	3.06593	359.188	15.9242	FALSE	FALSE	FALSE	0.0865519241008297
1	6554004	6504004	6604004	180	6	0.36247	189	0.0225367	0.265343	0.419076	0.495545	0.563165	0.604341	0.634173	0.661288	0.479581	-0.855386	0.000632374	0.137336	0.739899	0.119693	0.373881	3.20879	1125.93	23.6852	FALSE	FALSE	FALSE	0.0869241299168003
1	6654004	6604004	6704004	201	5	0.3715	221	0.0312286	0.324784	0.41163	0.483515	0.549802	0.603448	0.644068	0.672075	0.472954	-0.772275	0.00070891	0.0863095	0.689166	0.105014	0.869638	3.94118	55078.3	44.9963	FALSE	FALSE	FALSE	0.0874035092821666
1	6754004	6704004	6804004	385	6	0.36105	238	0.0215797	0.335513	0.473259	0.554306	0.614494	0.667167	0.697961	0.730441	0.418123	-0.907448	0.0010417	0.0788575	0.682637	0.198485	1.9883	4.67895	53852.2	1529.18	FALSE	FALSE	FALSE	0.0875183751357884
1	6854004	6804004	6904004	72	6	0.35948	144	0.0329315	0.334261	0.538316	0.586515	0.629717	0.662585	0.688713	0.706075	0.407688	-2.0339	0.000362654	0.118502	0.678526	0.143814	0.30792	5.91892	156692	288.713	FALSE	FALSE	FALSE	0.0890092019040204
1	6954004	6904004	7004004	130	4	0.37285	139	0.0179971	0.390426	0.586585	0.665569	0.715017	0.742669	0.774122	0.798051	0.332508	-1.87809	0.000551991	0.127375	0.889878	0.145571	0.107428	4.67188	1282.55	8.31285	FALSE	FALSE	FALSE	0.0897057805199089
1	7054004	7004004	7104004	143	2	0.38655	234	0.041958	0.301468	0.41912	0.523555	0.621216	0.689341	0.721089	0.735936	0.426896	-1.63488	0.000523356	0.126988	0.773435	0.110445	0.199302	3.09859	257.969	3.23364	FALSE	FALSE	FALSE	0.089959855659428
1	7154004	7104004	7204004	60	2	0.36747	97	0.019392	0.38133	0.52361	0.630958	0.726546	0.78682	0.814669	0.836632	0.328491	-1.97142	0.000235993	0.117211	0.921451	0.128157	0.0419553	4.21875	880.318	2.06125	FALSE	FALSE	FALSE	0.0902858514111655
1	7254004	7204004	7304004	104	14	0.35433	164	0.0237663	0.338198	0.519385	0.643074	0.701408	0.731273	0.749215	0.765433	0.364574	-1.79223	0.000467614	0.173308	0.696581	0.126169	4.58456	5.35849	38979.6	238.881	FALSE	FALSE	FALSE	0.0903296650523892
1	7354004	7304004	7404004	131	8	0.34929	181	0.0138749	0.17553	0.324146	0.418799	0.474008	0.523462	0.550622	0.57208	0.565908	-1.88325	0.000455038	0.105247	0.696268	0.0731706	1.3376	6.32258	109064	1699.96	FALSE	FALSE	FALSE	0.0909921649262533
1	7454004	7404004	7504004	591	7	0.37055	219	0.0171865	0.27618	0.483648	0.583609	0.640911	0.679353	0.710402	0.735749	0.412878	-0.0373779	0.00173405	0.128537	0.559578	0.238981	4.3903	2.73986	51401.7	15117.8	FALSE	FALSE	FALSE	0.0910075682494634
1	7554004	7504004	7604004	341	8	0.36336	240	0.0210443	0.334397	0.438283	0.493297	0.534342	0.571796	0.602046	0.629598	0.485177	0.675151	0.00131253	0.142189	0.533984	0.107503	4.70493	5.11834	99561.7	1752.37	FALSE	FALSE	FALSE	0.0911150327057918
1	7654004	7604004	7704004	388	7	0.37003	245	0.0205699	0.326283	0.462891	0.519063	0.567777	0.596415	0.620459	0.638841	0.466896	0.327563	0.00149043	0.122971	0.630735	0.132878	4.99749	4.1701	3244.84	388.34	FALSE	FALSE	TRUE	0.0913582721173154
1	7754004	7704004	7804004	228	6	0.36603	261	0.0239435	0.420911	0.584331	0.658425	0.690927	0.714155	0.733341	0.747716	0.350028	-0.172132	0.00109243	0.141442	0.687205	0.166734	4.32684	2.99153	3221	831.926	FALSE	FALSE	TRUE	0.0918922052806197
1	7854004	7804004	7904004	422	11	0.34066	239	0.0219232	0.149522	0.256971	0.332217	0.385517	0.434106	0.478428	0.511326	0.635987	-0.285278	0.00134724	0.0970891	0.603678	0.0763075	1.57538	3.59716	493.082	207.23	TRUE	FALSE	FALSE	0.09197199647757
1	7954004	7904004	8004004	312	10	0.38471	256	0.0247742	0.276895	0.370498	0.444668	0.490435	0.524341	0.558513	0.582587	0.536009	-0.86407	0.00102182	0.0845916	0.628819	0.0839377	0.524075	4.06494	719.642	18.4394	FALSE	FALSE	FALSE	0.0919958021136768
1	8054004	8004004	8104004	423	6	0.37917	252	0.0235663	0.386985	0.516709	0.571092	0.610292	0.643094	0.673744	0.698301	0.414255	0.47269	0.00170656	0.0726656	0.595092	0.147144	6.59059	4.23113	2771.95	1342.23	FALSE	FALSE	TRUE	0.0928622544660936
1	8154004	8104004	8204004	361	7	0.34529	248	0.0224394	0.211093	0.374127	0.439916	0.483375	0.520077	0.553128	0.585399	0.547555	-0.593247	0.00130796	0.104648	0.539079	0.0914983	2.59739	3.60773	2264.67	379.263	TRUE	FALSE	FALSE	0.0938571254047208
1	8254004	8204004	8304004	306	9	0.37176	267	0.0265549	0.343742	0.438862	0.532492	0.597121	0.635155	0.672035	0.701554	0.439863	-0.699704	0.00105683	0.0825827	0.707732	0.109724	0.739117	4.78571	7157.84	26.0528	FALSE	FALSE	FALSE	0.0953199442006991
1	8354004	8304004	8404004	297	10	0.36964	178	0.0238655	0.339308	0.513003	0.577037	0.633279	0.656958	0.6857	0.707892	0.412403	0.433403	0.000933099	0.119552	0.591144	0.162894	3.81119	3.78378	20017.5	2318.42	FALSE	FALSE	TRUE	0.0956693148226035
1	8454004	8404004	8504004	67	5	0.36114	257	0.0886135	0.117626	0.183498	0.232032	0.275801	0.313072	0.345327	0.374296	0.736907	-0.44409	0.000262223	0.0326455	0.393206	0.0281792	0.250431	4.5	158824	189.256	FALSE	FALSE	TRUE	0.0959246416926694
1	8554004	8504004	8604004	197	8	0.3433	187	0.023561	0.403945	0.480561	0.525494	0.565235	0.601967	0.632694	0.656857	0.447607	-0.18736	0.00091188	0.16908	0.673588	0.163167	1.67216	4.91919	135320	975.804	FALSE	FALSE	FALSE	0.0962628057805018
1	8654004	8604004	8704004	401	12	0.34232	252	0.0200756	0.532471	0.599803	0.653769	0.680592	0.70638	0.726	0.746839	0.336306	0.438288	0.00142461	0.0460555	0.62984	0.274857	6.41721	4.29293	65435.4	3887.04	FALSE	FALSE	FALSE	0.0962737067918118
1	8754004	8704004	8804004	320	9	0.3733	217	0.0137186	0.374059	0.477905	0.552435	0.616997	0.652487	0.680546	0.701193	0.420625	-1.17997	0.000851837	0.0733285	0.747373	0.144625	1.58974	5.96203	77882.5	709.19	FALSE	FALSE	FALSE	0.0968013814762465
1	8854004	8804004	8904004	275	6	0.36971	235	0.0238536	0.286101	0.377596	0.448389	0.515341	0.559647	0.599855	0.635427	0.511092	-1.17653	0.00092435	0.0900107	0.630664	0.0964567	1.74717	6.17266	17450.3	22.6555	FALSE	FALSE	FALSE	0.0973585612125955
1	8954004	8904004	9004004	220	10	0.37503	210	0.0227273	0.554756	0.66318	0.73407	0.768026	0.79591	0.809266	0.82241	0.264626	-0.810268	0.000865904	0.0600833	0.817757	0.190161	0.839908	5.44643	1616.43	13.992	FALSE	FALSE	FALSE	0.0973633230612538
1	9054004	9004004	9104004	113	10	0.35034	184	0.0181444	0.152003	0.290582	0.41764	0.46083	0.50257	0.537162	0.570809	0.581201	-1.82575	0.000385205	0.102628	0.764218	0.0692931	0.30411	2.16071	176.538	0.645135	FALSE	FALSE	FALSE	0.0979609806658039
1	9154004	9104004	9204004	379	12	0.36135	288	0.0337532	0.314986	0.424551	0.506841	0.550755	0.591603	0.617533	0.642336	0.478771	-0.602304	0.00126775	0.0984629	0.606251	0.0953641	1.692	4.85106	10492	328.005	FALSE	FALSE	TRUE	0.0981677364259812
1	9254004	9204004	9304004	339	4	0.38649	180	0.0233762	0.495434	0.654221	0.736156	0.782177	0.822797	0.845381	0.854805	0.258433	0.0842525	0.0012015	0.0579841	0.65572	0.239051	10.2942	3.50888	99402.7	4958.64	FALSE	FALSE	FALSE	0.0986270895489369
1	9354004	9304004	9404004	243	6	0.35489	178	0.0117763	0.175081	0.317452	0.379951	0.430855	0.48146	0.516977	0.549295	0.592704	-1.51241	0.000658998	0.0753764	0.612822	0.0956571	1.49428	5.2623	139330	2056.62	FALSE	FALSE	FALSE	0.0988669559364891
1	9454004	9404004	9504004	152	11	0.34851	207	0.0146475	0.196722	0.2931	0.381712	0.432225	0.489634	0.53562	0.573212	0.585397	-1.95798	0.00047367	0.114339	0.766035	0.0811098	0.20307	5.1039	17283.6	53.1638	FALSE	FALSE	FALSE	0.0995694193553803
1	9554004	9504004	9604004	182	5	0.38451	157	0.0166217	0.345893	0.508532	0.621275	0.709951	0.768023	0.797188	0.837067	0.344582	-1.40904	0.000601363	0.102515	0.903241	0.153666	0.191083	5.31111	2963.2	20.7818	FALSE	FALSE	FALSE	0.099730699171217
1	9754004	9704004	9804004	146	3	0.37482	157	0.0189541	0.345618	0.515797	0.627008	0.719626	0.770699	0.812815	0.828317	0.340017	-1.74106	0.000600491	0.143694	0.90721	0.138673	0.151411	3.66667	134.68	1.59429	FALSE	FALSE	FALSE	0.0997691930839683
1	9854004	9804004	9904004	89	4	0.39664	116	0.0186559	0.290742	0.504296	0.611609	0.70463	0.760469	0.789834	0.812231	0.360884	-1.84848	0.00040334	0.134295	0.919229	0.137105	0.207196	3.02273	217.269	1.22817	FALSE	FALSE	FALSE	0.0999647481230485
1	9954004	9904004	10004004	175	5	0.39178	163	0.0203414	0.264344	0.496306	0.625638	0.712113	0.762271	0.787345	0.804177	0.363972	-1.8481	0.000702602	0.118949	0.905298	0.154267	0.197342	6.23864	4567.86	9.05739	FALSE	FALSE	FALSE	0.100887656988866
1	10054004	10004004	10104004	200	10	0.35783	159	0.0172013	0.348306	0.503413	0.6446	0.717702	0.755038	0.786055	0.814429	0.347208	-1.54204	0.000669502	0.0908904	0.889213	0.19072	0.26746	7.43299	18624.7	31.3044	FALSE	FALSE	FALSE	0.101419895798596
1	10154004	10104004	10204004	110	14	0.36875	153	0.0196112	0.210214	0.318575	0.420949	0.500751	0.563252	0.625746	0.672373	0.526877	-1.92506	0.000384887	0.10525	0.824061	0.0838291	0.0878509	5.34483	34889.1	3.77435	FALSE	FALSE	FALSE	0.101451451085122
1	10254004	10204004	10304004	154	6	0.40982	226	0.0240546	0.219751	0.361021	0.472631	0.562877	0.63686	0.685581	0.715514	0.477966	-1.85351	0.00049353	0.119861	0.827608	0.0912312	0.0476479	3.55263	308.973	2.24866	FALSE	FALSE	FALSE	0.102050055087398
1	10554004	10504004	10604004	112	3	0.37271	169	0.0259996	0.22754	0.360707	0.469419	0.573582	0.653565	0.692935	0.721153	0.471586	-1.84748	0.000376314	0.122713	0.824822	0.105132	0.127137	4.90566	1367.53	4.91872	FALSE	FALSE	FALSE	0.102367417504376
1	10654004	10604004	10704004	93	4	0.38029	90	0.0112261	0.324122	0.47948	0.588116	0.662277	0.709946	0.751264	0.788454	0.385191	-1.87218	0.000318264	0.157225	0.908372	0.138598	0.044764	6.08163	5815.08	12.8981	FALSE	FALSE	FALSE	0.102815364806365
1	10754004	10704004	10804004	162	6	0.36251	189	0.017975	0.232694	0.334675	0.419638	0.499041	0.569032	0.630167	0.645149	0.524229	-1.99605	0.000534532	0.13699	0.799781	0.0833284	0.0684559	5.5625	24352.4	14.8949	FALSE	FALSE	FALSE	0.102973585150461
1	10854004	10804004	10904004	112	7	0.35517	165	0.0159479	0.202467	0.304076	0.396775	0.491093	0.572216	0.61107	0.643635	0.53981	-2.03683	0.000381286	0.148324	0.830845	0.0838553	0.144996	5.30909	18894.9	7.65836	FALSE	FALSE	FALSE	0.103227442057412
1	10954004	10904004	11004004	210	10	0.35036	171	0.0150644	0.330077	0.446531	0.535325	0.5887	0.641591	0.679648	0.718982	0.437021	-1.2863	0.000734712	0.183371	0.77214	0.105568	0.561781	7.27619	30899.2	30.8297	FALSE	FALSE	FALSE	0.103498285285848
1	11054004	11004004	11104004	77	7	0.36674	143	0.0221351	0.23721	0.385361	0.482576	0.556254	0.618397	0.675008	0.723375	0.474546	-2.04078	0.000270954	0.16444	0.793409	0.0846841	0.0685335	3.79487	1069.75	2.8977	FALSE	FALSE	FALSE	0.103849997963888
1	11154004	11104004	11204004	150	4	0.37421	129	0.0140042	0.257402	0.378931	0.494442	0.596981	0.661453	0.73147	0.760823	0.4455	-1.87567	0.000467697	0.159524	0.879582	0.104607	0.446542	5.36986	745.927	3.81771	FALSE	FALSE	FALSE	0.103994068888983
1	11254004	11204004	11304004	153	7	0.38923	195	0.0177992	0.215614	0.365456	0.501114	0.577854	0.64367	0.687431	0.724171	0.469241	-1.83196	0.000434007	0.145814	0.836755	0.0871619	0.328445	4.11688	438.143	2.54498	FALSE	FALSE	FALSE	0.104046779534725
1	11354004	11304004	11404004	151	9	0.36201	153	0.0173268	0.25721	0.435173	0.572877	0.636958	0.677512	0.725506	0.754108	0.420094	-1.73002	0.000411345	0.15436	0.856074	0.10622	0.26699	7.97368	105074	18.3208	FALSE	FALSE	FALSE	0.104166651911525
1	11454004	11404004	11504004	224	7	0.38331	171	0.0206649	0.466752	0.572916	0.658566	0.718542	0.758436	0.795666	0.812237	0.316698	-0.906783	0.000898887	0.136642	0.819669	0.213209	0.565045	7.47368	144613	77.6109	FALSE	FALSE	TRUE	0.104437874890011
1	11554004	11504004	11604004	153	7	0.36043	143	0.0109755	0.259978	0.392329	0.471472	0.548556	0.624793	0.69005	0.745917	0.466701	-1.89037	0.000516822	0.150461	0.851468	0.0946658	0.502869	7	62833.9	15.7733	FALSE	FALSE	FALSE	0.10447367743608
1	11654004	11604004	11704004	131	6	0.36011	134	0.0120505	0.200463	0.34717	0.461891	0.560929	0.642719	0.684291	0.709517	0.484717	-1.87777	0.000435021	0.163488	0.864411	0.0972264	0.33801	5.34921	943.17	4.51374	FALSE	FALSE	FALSE	0.104903991293495
1	11754004	11704004	11804004	102	9	0.35907	139	0.0133802	0.209384	0.365851	0.468724	0.563572	0.63609	0.680565	0.714678	0.480162	-1.84933	0.000295766	0.159865	0.88239	0.110884	0.321017	6.96226	47915.3	8.77916	TRUE	TRUE	FALSE	0.105033496899541
1	11854004	11804004	11904004	156	9	0.35476	136	0.0134253	0.190785	0.349007	0.480898	0.612906	0.696708	0.769109	0.802376	0.442602	-1.85829	0.000437215	0.137227	0.886137	0.108459	0.428367	6.16667	24908.4	11.4762	FALSE	FALSE	FALSE	0.105857062785908
1	11954004	11904004	12004004	138	8	0.35864	216	0.0212834	0.162749	0.315903	0.453557	0.576384	0.665416	0.724689	0.744663	0.47952	-1.76136	0.000426801	0.14334	0.844798	0.0936043	0.345392	3.4	312.597	2.25867	FALSE	FALSE	FALSE	0.105907057976221
1	12054004	12004004	12104004	188	9	0.37204	254	0.0354275	0.224434	0.384437	0.458664	0.525328	0.581874	0.614424	0.642142	0.509814	-1.3155	0.000693707	0.125292	0.67011	0.0903515	0.690937	3.19355	234.381	3.06967	FALSE	FALSE	FALSE	0.105970577413839
1	12154004	12104004	12204004	199	5	0.36699	204	0.0255681	0.525494	0.648676	0.740379	0.775944	0.806309	0.821673	0.835892	0.263662	-1.24948	0.000722784	0.183443	0.870458	0.227768	1.49698	5.20619	8404	286.762	FALSE	FALSE	FALSE	0.106197794600377
1	12254004	12204004	12304004	187	4	0.37156	189	0.0236101	0.30411	0.468874	0.563913	0.606272	0.644268	0.674043	0.702129	0.43377	-1.07254	0.000935685	0.179029	0.692244	0.12529	0.811091	6.85417	76951.6	51.531	FALSE	FALSE	FALSE	0.106228779857762
1	12354004	12304004	12404004	148	5	0.34929	178	0.023075	0.354338	0.507971	0.60864	0.667048	0.714428	0.749973	0.778135	0.37421	-1.31023	0.000566152	0.125927	0.82559	0.169813	0.818134	5.87671	69463.1	41.5178	FALSE	FALSE	FALSE	0.106335823630264
1	12454004	12404004	12504004	314	8	0.35388	232	0.0253375	0.343979	0.594669	0.656452	0.699164	0.735828	0.761592	0.77563	0.347526	-0.657297	0.00100963	0.170007	0.638818	0.171355	3.47204	5.10256	51584.6	905.829	FALSE	FALSE	FALSE	0.106714722588917
1	12554004	12504004	12604004	289	8	0.34948	199	0.0188897	0.211079	0.342989	0.437019	0.513376	0.568994	0.60033	0.631018	0.527885	-0.640698	0.00116851	0.200526	0.610866	0.0993862	2.28444	5.76027	36041.5	92.3257	FALSE	FALSE	FALSE	0.106913293592913
1	12654004	12604004	12704004	286	5	0.35713	176	0.0137221	0.41236	0.51729	0.596006	0.6455	0.691993	0.732384	0.748481	0.379427	-0.48474	0.000866727	0.142187	0.799848	0.176516	0.857933	6.92958	110423	204.367	FALSE	FALSE	FALSE	0.10698736061666
1	12754004	12704004	12804004	324	5	0.38855	186	0.0143839	0.548902	0.628305	0.678546	0.726046	0.766073	0.789087	0.804831	0.29403	-0.0145805	0.00110488	0.308332	0.849594	0.240466	1.65879	6.07317	138412	1309.12	FALSE	FALSE	FALSE	0.107278900028057
1	12854004	12804004	12904004	249	8	0.36738	193	0.0143214	0.227021	0.40774	0.505971	0.594023	0.65825	0.696231	0.725847	0.454988	-1.31596	0.000752072	0.18507	0.813674	0.141973	0.418273	5.36585	49595.6	382.095	FALSE	FALSE	TRUE	0.107317296585803
1	12954004	12904004	13004004	160	2	0.35333	134	0.0156447	0.224133	0.376904	0.519633	0.595863	0.656282	0.700604	0.738637	0.455421	-1.66293	0.000568929	0.149528	0.891197	0.105748	0.788958	3.95062	818.863	3.94187	FALSE	FALSE	FALSE	0.107436243948739
1	13054004	13004004	13104004	264	5	0.3495	239	0.0222985	0.336693	0.50804	0.558982	0.602877	0.641262	0.673974	0.691171	0.426715	-0.82176	0.000824478	0.124843	0.709218	0.109809	1.57471	4.56923	3070.6	85.7089	FALSE	FALSE	FALSE	0.107810960553749
1	13154004	13104004	13204004	163	10	0.36596	211	0.0175946	0.232495	0.359459	0.477903	0.565792	0.63201	0.67501	0.706049	0.478755	-1.75957	0.000540594	0.139307	0.836115	0.113218	0.170615	4.72619	2156.52	24.1316	FALSE	FALSE	FALSE	0.107842729915889
1	13254004	13204004	13304004	98	11	0.36708	139	0.0140547	0.180175	0.319909	0.441928	0.518605	0.58338	0.638701	0.674287	0.520431	-2.07307	0.00036078	0.165038	0.781838	0.0804237	0.0479535	5.56522	6302.87	6.00252	FALSE	FALSE	FALSE	0.108340683555456
1	13354004	13304004	13404004	84	2	0.40418	132	0.0207397	0.226914	0.429952	0.576673	0.644323	0.701444	0.743031	0.773233	0.414919	-1.64817	0.000284369	0.0731068	0.892006	0.157997	0.0990605	3.25581	3466.48	135.174	FALSE	FALSE	FALSE	0.108968449221068
1	13554004	13504004	13604004	141	7	0.37383	146	0.015924	0.308336	0.412857	0.509194	0.595585	0.677489	0.751914	0.76792	0.425244	-1.87783	0.000482553	0.137998	0.872582	0.105231	0.0507546	7.61972	59492.7	21.2616	FALSE	FALSE	FALSE	0.109100347604152
1	13654004	13604004	13704004	186	9	0.35953	187	0.0216744	0.312683	0.479535	0.564206	0.621666	0.660164	0.686197	0.706094	0.424208	-1.3713	0.000625678	0.170148	0.735625	0.107646	0.477982	5.33333	11483.8	88.5179	FALSE	FALSE	FALSE	0.109197799989663
1	13754004	13704004	13804004	155	2	0.39339	210	0.0229255	0.198892	0.336488	0.441133	0.536533	0.613277	0.677744	0.725181	0.495822	-1.71445	0.000445057	0.107043	0.853666	0.0777463	0.191624	3	124.964	1.88148	FALSE	FALSE	FALSE	0.109471285519276
1	13854004	13804004	13904004	278	2	0.40079	184	0.0140039	0.195452	0.320655	0.431821	0.53586	0.62949	0.72816	0.795005	0.480508	-1.69926	0.000721593	0.110827	0.926296	0.101256	0.280786	7.48529	29613.4	16.0715	FALSE	FALSE	FALSE	0.109679454047801
1	13954004	13904004	14004004	226	4	0.39872	189	0.0169477	0.151598	0.284063	0.405614	0.499292	0.59199	0.666907	0.749031	0.521644	-1.76541	0.000585915	0.110167	0.876607	0.092336	1.33699	7.41026	46583.5	10.7616	FALSE	FALSE	FALSE	0.109814503365762
1	14054004	14004004	14104004	170	1	0.38601	220	0.0412135	0.198424	0.354671	0.44492	0.530449	0.61466	0.66681	0.725695	0.49491	-1.24243	0.000480026	0.122795	0.786933	0.08614	1.53529	7.7619	56743.2	7.60989	FALSE	FALSE	FALSE	0.110189207502476
1	14254004	14204004	14304004	153	3	0.40181	137	0.0176347	0.166933	0.297159	0.42641	0.526702	0.63915	0.720434	0.789412	0.490543	-1.85692	0.000404003	0.1277	0.891445	0.0951667	0.108887	7.62338	90658.6	8.43842	FALSE	FALSE	FALSE	0.110325481376237
1	14354004	14304004	14404004	143	5	0.3686	146	0.0120069	0.168017	0.301689	0.402356	0.495823	0.556784	0.644261	0.687248	0.534832	-1.74655	0.000358212	0.12206	0.898554	0.0889816	0.432736	8.12329	154850	40.0633	FALSE	FALSE	FALSE	0.110376770503239
1	14454004	14404004	14504004	195	8	0.34408	134	0.0118691	0.256838	0.379952	0.477978	0.573588	0.621285	0.728024	0.773159	0.455597	-1.68916	0.000480092	0.151277	0.910756	0.106183	0.273657	7.66327	73261.4	74.2493	FALSE	FALSE	FALSE	0.110829352720891
1	14554004	14504004	14604004	156	6	0.36243	153	0.0129011	0.187929	0.346228	0.452061	0.547867	0.612486	0.654999	0.701471	0.499566	-1.7578	0.000465732	0.112593	0.862841	0.0852697	0.330218	5.32895	16547.8	6.61314	FALSE	FALSE	FALSE	0.111503979687405
1	14654004	14604004	14704004	154	5	0.37001	151	0.0227477	0.272423	0.458757	0.596971	0.713027	0.761258	0.798892	0.833267	0.366486	-1.53893	0.000562644	0.131785	0.855438	0.175169	0.19626	6.03846	16408.6	25.546	FALSE	FALSE	FALSE	0.11172205021354
1	14754004	14704004	14804004	180	6	0.37187	166	0.0166667	0.301948	0.394071	0.48457	0.560491	0.61545	0.671448	0.706073	0.466564	-1.58619	0.000604612	0.152239	0.857847	0.119189	0.17349	5.8427	3734.27	13.1739	FALSE	FALSE	FALSE	0.112046591700714
1	14854004	14804004	14904004	93	2	0.38344	138	0.0190032	0.220791	0.358242	0.461942	0.576634	0.671665	0.707955	0.741321	0.465921	-1.95489	0.000310781	0.132447	0.835896	0.100785	0.213235	5.23913	22982.3	5.62829	FALSE	FALSE	FALSE	0.112282330248396
1	14954004	14904004	15004004	141	9	0.36755	175	0.012757	0.160845	0.306446	0.404347	0.467292	0.513176	0.552174	0.589454	0.572324	-1.78269	0.000532367	0.135768	0.797421	0.0743299	0.227827	3.47945	1785.93	9.25334	FALSE	FALSE	FALSE	0.112482979958103
1	15054004	15004004	15104004	182	5	0.38212	256	0.0419863	0.394047	0.50327	0.587712	0.62999	0.667678	0.687252	0.706038	0.40343	-0.625079	0.000754213	0.135428	0.684545	0.119728	0.881426	3.31868	478.98	17.3148	FALSE	FALSE	FALSE	0.113019178789032
1	15154004	15104004	15204004	173	7	0.35434	144	0.0127967	0.291038	0.440936	0.540378	0.611628	0.658649	0.702241	0.733916	0.431602	-1.61993	0.000639102	0.156045	0.875929	0.106145	1.16479	6.02326	3332.68	22.1702	FALSE	FALSE	FALSE	0.113023879241888
1	15254004	15204004	15304004	127	12	0.36622	133	0.00836924	0.168263	0.277414	0.367957	0.446392	0.510232	0.595229	0.628339	0.572311	-1.93102	0.000480286	0.127711	0.872694	0.0673929	0.310015	6.75806	131659	13.7517	FALSE	FALSE	FALSE	0.113480083621356
1	15354004	15304004	15404004	194	5	0.40008	152	0.020424	0.438348	0.552801	0.6052	0.657253	0.696979	0.719291	0.741875	0.36975	-1.62085	0.000525397	0.131067	0.890976	0.284085	0.291954	4.30612	36007.9	2551.49	FALSE	FALSE	FALSE	0.113612199214819
1	15454004	15404004	15504004	115	5	0.36406	120	0.00957069	0.242777	0.429877	0.542432	0.645091	0.696896	0.73098	0.759443	0.421786	-1.83932	0.000427506	0.148262	0.890264	0.107004	0.268117	6.15517	46084.2	8.0743	FALSE	FALSE	FALSE	0.113877489621365
1	15554004	15504004	15604004	182	6	0.40731	148	0.0109199	0.211024	0.341826	0.439789	0.531296	0.622935	0.680045	0.775993	0.485299	-1.73313	0.000459895	0.14795	0.911637	0.0941654	0.361469	5.08989	376.966	1.76991	FALSE	FALSE	FALSE	0.114671483823915
1	15654004	15604004	15704004	175	1	0.37557	141	0.0119317	0.187945	0.305079	0.414587	0.503047	0.61168	0.693937	0.752304	0.504489	-1.84123	0.000499711	0.153564	0.923551	0.0954956	0.337082	5.86364	1306.43	6.48634	FALSE	FALSE	FALSE	0.114696243690947
1	15754004	15704004	15804004	136	5	0.38627	135	0.0144284	0.286175	0.426889	0.537763	0.633902	0.72302	0.756614	0.787314	0.406903	-1.9168	0.000505834	0.170345	0.855047	0.123147	0.348364	5.94286	2503.58	5.44541	FALSE	FALSE	FALSE	0.114771126207231
1	15854004	15804004	15904004	50	6	0.35366	68	0.00918239	0.343891	0.485655	0.591218	0.689088	0.743845	0.77746	0.800994	0.366836	-2.02281	0.000212631	0.167943	0.922206	0.12551	0.0435195	5	26394.7	1.60289	FALSE	FALSE	FALSE	0.114957232438257
1	15954004	15904004	16004004	190	3	0.36456	131	0.0102946	0.182101	0.295197	0.392789	0.480749	0.561916	0.627246	0.678517	0.540212	-1.77921	0.000467242	0.131351	0.894387	0.0801907	0.556637	7.97895	10230.4	8.24003	FALSE	FALSE	FALSE	0.115175913019312
1	16054004	16004004	16104004	122	7	0.37759	147	0.0144345	0.248639	0.366185	0.450071	0.533952	0.618626	0.676636	0.74851	0.479626	-1.79335	0.000394692	0.144572	0.898926	0.0909124	0.242437	3.4918	228.642	2.04043	FALSE	FALSE	FALSE	0.115197097097963
1	16154004	16104004	16204004	157	6	0.36658	114	0.0114169	0.229612	0.371165	0.492984	0.61635	0.704774	0.767274	0.821295	0.428078	-1.72094	0.000479431	0.12348	0.91719	0.106074	0.463906	6.37662	1774.91	1.85764	FALSE	FALSE	FALSE	0.115225957134689
1	16254004	16204004	16304004	154	7	0.34188	145	0.0126195	0.205854	0.373948	0.493422	0.565172	0.616638	0.654487	0.694894	0.485084	-1.82073	0.000471688	0.157318	0.860331	0.0871636	0.429824	6.30769	1061.51	5.9855	FALSE	FALSE	FALSE	0.115245197076889
1	16354004	16304004	16404004	195	2	0.39331	157	0.0139655	0.274262	0.428343	0.568817	0.641748	0.691175	0.745815	0.787949	0.408842	-1.83183	0.000591511	0.139802	0.900043	0.109827	0.274228	5.31579	1020.38	3.47386	FALSE	FALSE	FALSE	0.115502368843822
1	16454004	16404004	16504004	162	3	0.37982	176	0.0208867	0.236533	0.365563	0.462758	0.560338	0.649702	0.718545	0.747772	0.465541	-1.93302	0.000546121	0.118482	0.870812	0.0983967	0.152811	5.90476	2033.18	3.76575	FALSE	FALSE	FALSE	0.115540364189823
1	16554004	16504004	16604004	115	8	0.3619	101	0.0131802	0.320223	0.499001	0.581892	0.644322	0.698151	0.749951	0.795614	0.387264	-1.99275	0.000466044	0.17484	0.90136	0.11937	0.131394	4.89474	908.994	3.44561	FALSE	FALSE	FALSE	0.115566637429044
1	16654004	16604004	16704004	113	8	0.33032	191	0.0228196	0.247242	0.364095	0.453191	0.539737	0.60406	0.636755	0.666864	0.498294	-1.84408	0.000403199	0.181021	0.765639	0.0786491	0.388725	3.64286	930.759	2.30264	FALSE	FALSE	FALSE	0.115622337136674
1	16754004	16704004	16804004	119	6	0.3802	129	0.0151683	0.303425	0.455768	0.582664	0.680418	0.747015	0.775645	0.796001	0.379866	-2.03197	0.000501125	0.168131	0.873953	0.128095	0.485693	6.98333	19929.1	9.43021	FALSE	FALSE	FALSE	0.115743318705118
1	16854004	16804004	16904004	81	2	0.39232	111	0.0211973	0.259791	0.455375	0.629014	0.781008	0.839471	0.855661	0.868044	0.330234	-1.95422	0.000335699	0.186615	0.909517	0.155557	0.0719595	8.02564	84478.3	4.80996	FALSE	FALSE	FALSE	0.116302589449951
1	16954004	16904004	17004004	152	9	0.36707	163	0.0154336	0.23217	0.423956	0.55024	0.671834	0.716332	0.742014	0.779469	0.411998	-1.95016	0.000545395	0.175627	0.880941	0.118139	0.586057	5.85897	166661	1397.95	FALSE	FALSE	FALSE	0.116436939499465
1	17054004	17004004	17104004	431	7	0.37244	184	0.0138919	0.457843	0.675418	0.73118	0.786095	0.816857	0.842517	0.861502	0.261227	-0.47173	0.00152459	0.139861	0.749221	0.319538	2.77119	3.19816	94233	10625.1	FALSE	FALSE	FALSE	0.116531608662832
1	17154004	17104004	17204004	659	2	0.38728	201	0.0255294	0.833101	0.859106	0.883783	0.896652	0.907729	0.917532	0.925027	0.11101	0.845837	0.00268369	0.0266251	0.933071	0.633099	6.35715	3.81846	107124	12046.9	FALSE	FALSE	FALSE	0.117132915301887
1	17254004	17204004	17304004	219	10	0.36584	156	0.0214239	0.304121	0.465758	0.555988	0.627429	0.677797	0.722061	0.74151	0.415048	-1.3001	0.000790849	0.112395	0.857715	0.124954	0.37393	6.96429	176837	1037.98	FALSE	FALSE	TRUE	0.117472798006905
1	17354004	17304004	17404004	179	6	0.38382	133	0.0202031	0.46447	0.583986	0.63697	0.682563	0.724668	0.76237	0.797783	0.335313	-1.43221	0.000659172	0.104503	0.870878	0.18387	0.442961	7.1	65426.9	161.203	FALSE	FALSE	FALSE	0.11758914521921
1	17454004	17404004	17504004	182	5	0.38484	149	0.0167945	0.233794	0.445099	0.592032	0.675246	0.746892	0.812402	0.838688	0.379407	-1.82264	0.000679848	0.135106	0.910994	0.13095	0.270517	7.29213	45546.7	6.30411	FALSE	FALSE	FALSE	0.117903953506904
1	17554004	17504004	17604004	181	4	0.39961	171	0.017478	0.233757	0.399906	0.548177	0.658688	0.724938	0.772775	0.801359	0.408628	-1.57739	0.000561448	0.14358	0.898659	0.113617	0.262109	3.87912	269.886	5.334	FALSE	FALSE	FALSE	0.118429606858625
1	17654004	17604004	17704004	169	8	0.36218	159	0.0180864	0.221829	0.402964	0.506411	0.591882	0.630543	0.664695	0.695423	0.469465	-1.66885	0.000541063	0.0988591	0.820676	0.129028	0.345815	5.25581	67577.5	282.754	FALSE	FALSE	FALSE	0.118768949632797
1	17754004	17704004	17804004	248	5	0.37329	152	0.0193751	0.391482	0.522041	0.622107	0.6771	0.716733	0.746239	0.768088	0.365173	-1.30091	0.000756852	0.111291	0.8609	0.214015	0.537483	6	166953	936.975	FALSE	FALSE	FALSE	0.119035764917535
1	17854004	17804004	17904004	193	2	0.40049	176	0.0251898	0.299984	0.462178	0.551143	0.623558	0.673732	0.711337	0.750064	0.418286	-1.05827	0.000645541	0.129996	0.743508	0.157459	0.526064	6.60396	144353	304.729	FALSE	FALSE	FALSE	0.119073559773183
1	17954004	17904004	18004004	226	6	0.38282	208	0.0226526	0.219921	0.42162	0.594641	0.653587	0.696899	0.737565	0.774023	0.414535	-1.07805	0.00068683	0.12923	0.830485	0.120374	0.21315	7.66964	144813	63.6591	FALSE	FALSE	FALSE	0.119078953287405
1	18054004	18004004	18104004	166	8	0.37139	186	0.017845	0.180311	0.342938	0.488126	0.581522	0.641383	0.686643	0.733376	0.477957	-1.64734	0.000497396	0.165545	0.849571	0.105618	0.422086	6.49383	45138.7	153.408	FALSE	FALSE	FALSE	0.119994290636314
1	18154004	18104004	18204004	104	8	0.36075	146	0.0216497	0.303999	0.492371	0.625488	0.693297	0.758452	0.802883	0.824998	0.35693	-1.77272	0.000357391	0.201773	0.876904	0.121458	0.389129	4.59615	750.973	7.48202	FALSE	FALSE	TRUE	0.120162217050175
1	18254004	18204004	18304004	136	4	0.36925	147	0.0247873	0.284639	0.411369	0.529261	0.616808	0.688727	0.730242	0.754507	0.42635	-1.74663	0.000410346	0.184063	0.859925	0.107313	0.324543	4.62319	1369.95	134.249	FALSE	FALSE	FALSE	0.120169929523808
1	18354004	18304004	18404004	162	8	0.37215	156	0.014248	0.263724	0.416365	0.510358	0.583294	0.649993	0.707398	0.751378	0.445356	-1.89384	0.000499007	0.149453	0.842832	0.115812	0.767277	7.45	78047	41.0993	FALSE	FALSE	FALSE	0.1202678533529
1	18454004	18404004	18504004	220	7	0.36794	195	0.0206975	0.261901	0.434072	0.535845	0.59269	0.643886	0.688075	0.728294	0.445034	-1.5833	0.000692719	0.173799	0.796396	0.10965	0.713644	5.70796	10117.5	51.4865	FALSE	FALSE	TRUE	0.12031711555848
1	18554004	18504004	18604004	140	4	0.36912	247	0.0478886	0.244204	0.431651	0.523677	0.594868	0.63125	0.667196	0.681329	0.460832	-1.74444	0.000483491	0.137541	0.723895	0.0885483	0.249437	2.94203	363.215	3.73854	FALSE	FALSE	FALSE	0.1204090902557
1	18654004	18604004	18704004	132	3	0.36439	127	0.0180103	0.253035	0.477649	0.646517	0.739142	0.807451	0.857517	0.870902	0.335398	-2.00359	0.000467538	0.194198	0.896932	0.145279	0.350496	7.43284	54557.9	22.5575	FALSE	FALSE	FALSE	0.120521658680785
1	18754004	18704004	18804004	111	5	0.3634	140	0.020851	0.249168	0.403342	0.549989	0.638704	0.710528	0.774951	0.802973	0.410049	-1.68837	0.000387116	0.148621	0.865537	0.105928	0.106708	7.24528	56553	25.0291	FALSE	FALSE	TRUE	0.120630390180435
1	18854004	18804004	18904004	107	9	0.38727	191	0.0276259	0.217338	0.320361	0.411034	0.484335	0.556343	0.604194	0.648075	0.536903	-1.85226	0.000450913	0.213015	0.760991	0.0849859	0.146685	4.33333	534.119	4.47444	FALSE	FALSE	FALSE	0.120864194813379
1	18954004	18904004	19004004	104	4	0.36787	96	0.0158442	0.266582	0.446478	0.595238	0.723413	0.782644	0.816856	0.846191	0.360371	-1.91667	0.000356755	0.198777	0.935181	0.137368	0.176617	6.67925	1433.76	6.91226	FALSE	FALSE	TRUE	0.121189891163484
1	19054004	19004004	19104004	168	11	0.35735	195	0.0186807	0.300363	0.440163	0.559216	0.635532	0.702999	0.729057	0.752184	0.411498	-1.73861	0.000545143	0.205543	0.840327	0.106584	0.379125	4.35366	1034.11	4.88682	FALSE	FALSE	FALSE	0.121319887272092
1	19154004	19104004	19204004	112	8	0.36729	128	0.0179695	0.292324	0.433565	0.551107	0.659055	0.730301	0.767768	0.787609	0.396896	-1.94259	0.000404192	0.218832	0.899651	0.124934	0.239424	4.10526	735.63	3.78371	FALSE	FALSE	FALSE	0.12161104241678
1	19254004	19204004	19304004	105	1	0.39194	111	0.018209	0.331986	0.488661	0.623351	0.722817	0.79719	0.826734	0.844204	0.337865	-1.74139	0.000467146	0.229764	0.914966	0.142209	0.285098	3.49091	484.881	1.91362	FALSE	FALSE	FALSE	0.12164351661556
1	19354004	19304004	19404004	158	4	0.4099	146	0.0193854	0.291292	0.464303	0.594735	0.711395	0.794568	0.821824	0.836265	0.355088	-1.61136	0.000514953	0.23156	0.913101	0.143084	0.343772	5.33766	1881.81	10.1184	FALSE	FALSE	FALSE	0.122093838565315
1	19454004	19404004	19504004	149	6	0.39286	124	0.019881	0.265325	0.432161	0.585112	0.704855	0.779207	0.817144	0.836929	0.368467	-1.67156	0.000462581	0.235767	0.911638	0.143288	0.458935	5.36	775.537	4.1379	FALSE	FALSE	FALSE	0.122098039586176
1	19554004	19504004	19604004	123	5	0.37447	130	0.0163113	0.220891	0.393467	0.543974	0.640648	0.693683	0.740625	0.771236	0.427925	-1.83239	0.000424805	0.201288	0.885496	0.109317	0.525192	4.40984	505.404	3.72994	FALSE	FALSE	FALSE	0.122324384146605
1	19654004	19604004	19704004	175	9	0.38132	162	0.017071	0.202652	0.32537	0.425709	0.509433	0.582003	0.650744	0.710042	0.513435	-1.76153	0.000521364	0.177349	0.876352	0.0886289	0.311239	4.72414	684.312	4.49763	FALSE	FALSE	TRUE	0.12315382083224
1	19754004	19704004	19804004	137	12	0.36311	110	0.0134049	0.170746	0.30625	0.420004	0.533767	0.62208	0.711682	0.771845	0.494804	-1.97345	0.000407489	0.178313	0.909417	0.100933	0.376996	5.51429	1329.39	4.06219	FALSE	FALSE	TRUE	0.123610862380223
1	19854004	19804004	19904004	86	6	0.38159	82	0.0144069	0.197894	0.353273	0.496085	0.618394	0.709646	0.776981	0.812141	0.433655	-1.84552	0.000263305	0.182919	0.922158	0.111793	0.27271	7.11364	12352.7	4.33765	FALSE	FALSE	FALSE	0.123969282657439
1	19954004	19904004	20004004	132	1	0.41265	196	0.0284925	0.205853	0.356987	0.467533	0.561591	0.652987	0.732862	0.762293	0.465699	-1.35583	0.000388424	0.168215	0.793331	0.104475	0.416559	3.77778	511.563	7.06572	FALSE	FALSE	FALSE	0.124134004668177
1	20054004	20004004	20104004	116	3	0.38669	138	0.0220668	0.229376	0.430726	0.563521	0.658958	0.748814	0.803028	0.824218	0.391623	-1.56642	0.000380433	0.220089	0.885597	0.122486	0.280564	3.52542	463.394	0.973362	FALSE	FALSE	FALSE	0.124308466356669
1	20154004	20104004	20204004	99	2	0.36024	121	0.0194397	0.234093	0.385805	0.506291	0.618795	0.722247	0.78148	0.800145	0.421592	-1.44242	0.000322964	0.20125	0.897129	0.115863	0.23685	4.17021	704.601	2.91651	FALSE	FALSE	FALSE	0.124342179088942
1	20254004	20204004	20304004	54	5	0.36429	110	0.0146751	0.140834	0.256801	0.354138	0.441842	0.508063	0.559654	0.593457	0.592173	-1.81062	0.000291361	0.17386	0.797798	0.0659019	0.233034	1.16667	18.378	0.0584185	FALSE	FALSE	FALSE	0.124467415559066
1	20354004	20304004	20404004	108	7	0.36065	135	0.0160144	0.288272	0.449326	0.572693	0.647967	0.700406	0.725259	0.747788	0.409756	-1.71889	0.000345523	0.211977	0.87803	0.108734	0.263723	3.35185	310.61	2.43653	FALSE	FALSE	FALSE	0.124550168246658
1	20454004	20404004	20504004	104	7	0.35506	134	0.0149976	0.34251	0.482083	0.586081	0.670564	0.709472	0.745287	0.779438	0.383509	-1.70205	0.000387408	0.24016	0.904593	0.109163	0.292742	4.08	421.597	2.08862	FALSE	FALSE	FALSE	0.124779714925149
1	20554004	20504004	20604004	248	7	0.36493	180	0.0214039	0.831939	0.859779	0.884803	0.896229	0.904826	0.915924	0.923969	0.11179	0.773005	0.00117653	0.467797	0.928573	0.531721	8.83362	4.30081	97493.4	3988.56	FALSE	FALSE	FALSE	0.124816277636238
1	20654004	20604004	20704004	367	4	0.38674	227	0.0341542	0.879702	0.894603	0.904638	0.911321	0.916822	0.920713	0.924525	0.0925251	3.35346	0.00176857	0.478536	0.95219	0.585904	13.0649	3.61202	199999	13790.4	FALSE	FALSE	FALSE	0.125139353085528
1	20754004	20704004	20804004	603	4	0.40762	256	0.0300176	0.819127	0.863858	0.883886	0.894579	0.902608	0.911415	0.916996	0.115362	1.90301	0.00274048	0.390733	0.840848	0.438902	10.3425	3.01639	199999	29721.1	FALSE	FALSE	FALSE	0.125485767955072
1	20854004	20804004	20904004	493	4	0.36175	203	0.0370597	0.759327	0.799192	0.826144	0.846716	0.864943	0.875037	0.882648	0.163714	2.18475	0.00187129	0.185461	0.834806	0.407468	5.78043	3	199999	31069.7	FALSE	FALSE	FALSE	0.125648360560376
1	20954004	20904004	21004004	68	7	0.36355	146	0.02229	0.267094	0.454223	0.609628	0.665448	0.701327	0.729532	0.753071	0.402811	-1.58686	0.000304849	0.137694	0.836525	0.125568	0.253968	6.55556	62114	741.507	FALSE	FALSE	FALSE	0.125700311386402
1	21054004	21004004	21104004	87	7	0.36075	130	0.0184342	0.252889	0.406603	0.505785	0.569782	0.622638	0.666054	0.706594	0.467094	-2.00364	0.000318621	0.15351	0.811301	0.0914319	0.299113	6.47826	100116	7.73043	FALSE	FALSE	FALSE	0.125790400812233
1	21154004	21104004	21204004	248	10	0.37677	143	0.0110316	0.385933	0.517205	0.638976	0.708926	0.74929	0.776175	0.796966	0.346647	-1.69045	0.000560106	0.1367	0.900043	0.313732	0.170292	3.63636	94320.6	4854.06	FALSE	FALSE	FALSE	0.126054107136272
1	21354004	21304004	21404004	122	3	0.38332	142	0.0196928	0.429727	0.618389	0.718522	0.747379	0.773484	0.79038	0.809474	0.301806	-1.80025	0.000494803	0.239464	0.794797	0.143575	0.252178	6.21667	110610	441.586	FALSE	FALSE	FALSE	0.126140168942526
1	21454004	21404004	21504004	174	9	0.36658	153	0.0191571	0.65794	0.718876	0.765368	0.798404	0.816636	0.83853	0.857848	0.220914	-1.33516	0.000747685	0.364013	0.922294	0.243731	1.36544	5.77273	44740.8	345.63	FALSE	FALSE	FALSE	0.12633263180399
1	21554004	21504004	21604004	172	7	0.38467	216	0.0274974	0.254042	0.402062	0.520219	0.634469	0.674925	0.704017	0.729046	0.440174	-1.82908	0.000546619	0.16116	0.746777	0.100789	0.366785	4.51765	998.659	28.9628	FALSE	FALSE	FALSE	0.126491586048027
1	21654004	21604004	21704004	135	4	0.36953	165	0.019986	0.367889	0.53106	0.651603	0.723634	0.759586	0.793094	0.815325	0.33683	-1.93051	0.000510265	0.224385	0.925246	0.130978	0.0806436	5.21739	2312.92	19.3778	FALSE	FALSE	FALSE	0.12669154208625
1	21754004	21704004	21804004	123	8	0.38027	130	0.0139592	0.265318	0.407444	0.539517	0.630422	0.683107	0.728218	0.765739	0.425748	-1.99562	0.000427826	0.194675	0.915099	0.101436	0.0521005	4.93443	2789.61	38.9677	FALSE	FALSE	FALSE	0.128071707814268
1	21854004	21804004	21904004	52	4	0.37974	61	0.0152395	0.337654	0.537407	0.656133	0.732468	0.794591	0.84108	0.863163	0.319643	-2.07577	0.000212931	0.206709	0.948006	0.139279	0.0300737	6.75	17674.1	11.9604	FALSE	FALSE	FALSE	0.128350107149388
1	21954004	21904004	22004004	157	1	0.39939	120	0.0153828	0.277238	0.466444	0.625875	0.716628	0.79996	0.842767	0.863745	0.343906	-1.8562	0.000540369	0.218085	0.94178	0.136041	0.0816768	8.66667	173946	35.3286	FALSE	FALSE	FALSE	0.128535873688535
1	22054004	22004004	22104004	160	3	0.40757	135	0.0158805	0.444947	0.630435	0.765033	0.804121	0.837872	0.856263	0.876086	0.255035	-1.91997	0.000683945	0.25974	0.937296	0.177313	0.106555	8.49367	174992	30.6804	FALSE	FALSE	FALSE	0.128789753503193
1	22154004	22104004	22204004	102	3	0.39847	141	0.0182513	0.391176	0.628168	0.720821	0.76701	0.797849	0.816367	0.83346	0.292164	-2.02929	0.000501883	0.226612	0.841708	0.165903	0.0957473	6.63462	35660.9	10.8801	FALSE	FALSE	FALSE	0.12882467010343
1	22254004	22204004	22304004	134	5	0.36033	221	0.0336056	0.297899	0.452007	0.523604	0.578777	0.629862	0.665684	0.688345	0.451975	-1.85603	0.000519934	0.175951	0.718115	0.0741617	0.0480343	3.33333	375.448	19.0441	FALSE	FALSE	FALSE	0.12885209351528
1	22354004	22304004	22404004	136	5	0.37964	133	0.0167407	0.332878	0.467598	0.587678	0.673943	0.746393	0.808283	0.828286	0.364992	-1.8772	0.000410038	0.199658	0.903713	0.115258	-0.0120478	5.1	956.732	4.0608	FALSE	FALSE	FALSE	0.129078178967774
1	22454004	22404004	22504004	96	7	0.38335	124	0.0161819	0.288369	0.442967	0.572341	0.641479	0.69057	0.735134	0.772145	0.408142	-1.87645	0.000344674	0.225838	0.86634	0.108017	0.15965	3.93182	799.98	6.47198	FALSE	FALSE	FALSE	0.129364908099218
1	22554004	22504004	22604004	118	6	0.35807	191	0.02084	0.24541	0.363199	0.469768	0.5585	0.622471	0.676047	0.700741	0.480552	-1.94843	0.000395985	0.187426	0.763619	0.0814522	0.181664	4.32787	1132.4	4.10852	FALSE	FALSE	FALSE	0.129382895449653
1	22654004	22604004	22704004	123	5	0.36853	123	0.0119139	0.291225	0.538314	0.672245	0.74828	0.77714	0.803177	0.825929	0.334813	-1.85203	0.000449276	0.204263	0.905867	0.135226	0.188263	6.30645	3527.3	5.16389	FALSE	FALSE	FALSE	0.129420077531874
1	22754004	22704004	22804004	112	2	0.38177	145	0.0163971	0.237669	0.437369	0.577336	0.692745	0.784395	0.823692	0.843707	0.37187	-1.81295	0.000410064	0.198078	0.910976	0.118988	0.469314	4.58929	566.359	3.19395	FALSE	FALSE	FALSE	0.129515555341538
1	22854004	22804004	22904004	172	5	0.36972	149	0.0129077	0.189365	0.359802	0.514153	0.642742	0.73405	0.785931	0.824009	0.421421	-1.60175	0.000511886	0.213485	0.921282	0.129009	0.340962	4.32558	373.176	3.59655	FALSE	FALSE	FALSE	0.129548137358395
1	22954004	22904004	23004004	103	5	0.37585	132	0.0158759	0.201727	0.373563	0.494386	0.614626	0.713398	0.762235	0.788429	0.435948	-1.81833	0.000334148	0.204851	0.892917	0.105182	0.242475	4.53846	970.138	8.40383	FALSE	FALSE	FALSE	0.12982102118114
1	23054004	23004004	23104004	85	9	0.38002	105	0.0114687	0.380086	0.556888	0.618383	0.673958	0.714036	0.744924	0.774286	0.362492	-1.71324	0.000321338	0.29519	0.84734	0.132045	0.15823	4.35714	887.393	4.10382	FALSE	FALSE	FALSE	0.13009375400494
1	23154004	23104004	23204004	86	3	0.38957	146	0.0247184	0.373455	0.606717	0.682445	0.726016	0.764458	0.790365	0.811348	0.320742	-1.75144	0.000386381	0.283276	0.847988	0.143254	0.162466	3.02326	572.284	1.72322	FALSE	FALSE	FALSE	0.130181540256017
1	23254004	23204004	23304004	71	2	0.36148	146	0.0315351	0.473996	0.694972	0.735732	0.768851	0.788844	0.808601	0.822047	0.272422	-1.56303	0.000309996	0.316481	0.774372	0.165996	0.0251975	3.57143	1340.49	2.27463	FALSE	FALSE	FALSE	0.130338999539131
1	23354004	23304004	23404004	91	3	0.40005	94	0.0197664	0.477173	0.720096	0.782162	0.837228	0.871355	0.888814	0.90191	0.217323	-1.72464	0.000466125	0.324325	0.913642	0.218328	0.083103	7.82609	105366	19.1816	FALSE	FALSE	FALSE	0.130359455495817
1	23454004	23404004	23504004	91	3	0.39595	124	0.0221162	0.382677	0.606958	0.676177	0.726239	0.774063	0.802841	0.818194	0.316122	-1.50444	0.000335104	0.302356	0.832301	0.164532	0.241684	7.69565	142879	39.7166	FALSE	FALSE	FALSE	0.13054572941548
1	23554004	23504004	23604004	153	2	0.38424	128	0.0194023	0.365223	0.589676	0.685593	0.75504	0.810138	0.837821	0.856728	0.299969	-1.44854	0.000491105	0.235105	0.900064	0.132538	0.0923831	7.25	58524.1	38.5492	FALSE	FALSE	FALSE	0.130601810518967
1	23654004	23604004	23704004	142	8	0.35961	175	0.029542	0.330744	0.5073	0.591546	0.672138	0.734373	0.77272	0.787021	0.372023	-1.52728	0.000452772	0.210772	0.786968	0.107344	0.142578	6.47887	85759.2	86.3261	FALSE	FALSE	FALSE	0.130658540456037
1	23754004	23704004	23804004	109	3	0.39889	132	0.0195026	0.358094	0.53234	0.669743	0.765963	0.810693	0.844292	0.866769	0.307444	-1.48625	0.000346766	0.259975	0.90301	0.142911	0.216945	6.83636	69270.1	13.4697	FALSE	FALSE	FALSE	0.130666367166412
1	23854004	23804004	23904004	124	6	0.38231	116	0.0182593	0.322331	0.570493	0.693315	0.793978	0.821616	0.839481	0.853078	0.300815	-1.52011	0.0004281	0.237239	0.894192	0.17047	0.0421598	7.35484	91266.3	28.1988	FALSE	FALSE	FALSE	0.130739750724617
1	23954004	23904004	24004004	148	4	0.36829	190	0.0208227	0.293361	0.491129	0.595931	0.671165	0.734686	0.767947	0.78785	0.379704	-1.5928	0.000452846	0.19628	0.844723	0.115544	0.0906896	5.66667	26473.7	11.6369	FALSE	FALSE	FALSE	0.130747475838212
1	24054004	24004004	24104004	82	1	0.36528	90	0.0140359	0.317833	0.516631	0.656082	0.743718	0.802033	0.818395	0.831109	0.3306	-1.21208	0.000251958	0.232148	0.893573	0.142943	0.110724	6.33333	69609	27.7619	FALSE	FALSE	FALSE	0.130776497531278
1	24154004	24104004	24204004	120	3	0.37543	93	0.0168763	0.348094	0.602112	0.718052	0.803315	0.857837	0.882012	0.89817	0.270059	-1.39588	0.000426518	0.272588	0.941365	0.161225	0.274769	7.80328	186891	49.8411	FALSE	FALSE	FALSE	0.130889630284319
1	24254004	24204004	24304004	127	3	0.39975	119	0.0165404	0.344534	0.572783	0.735263	0.811805	0.872791	0.887098	0.897027	0.268386	-1.76974	0.000473885	0.268227	0.925156	0.164429	0.193425	7.3125	55747.1	25.0084	FALSE	FALSE	FALSE	0.13095248856387
1	24354004	24304004	24404004	131	2	0.40704	221	0.0317346	0.324822	0.582861	0.693759	0.774943	0.80145	0.817479	0.834895	0.30997	-1.3583	0.000537363	0.241947	0.815938	0.144202	0.192076	2.89231	406.071	5.80079	FALSE	FALSE	FALSE	0.131087640558448
1	24454004	24404004	24504004	136	2	0.39625	126	0.0148909	0.394756	0.651485	0.767915	0.824005	0.852567	0.873986	0.895396	0.248556	-1.25407	0.000472584	0.298173	0.919358	0.183035	0.157201	7.04615	66631.2	43.1166	FALSE	FALSE	FALSE	0.131652757439565
1	24654004	24604004	24704004	87	5	0.39244	149	0.0223379	0.421519	0.613667	0.689426	0.757729	0.794131	0.819472	0.837516	0.29522	-1.2851	0.000283126	0.29876	0.893113	0.139395	0.134233	2.875	556.233	4.43867	FALSE	FALSE	FALSE	0.131792617313031
1	24754004	24704004	24804004	111	4	0.36944	143	0.0193212	0.3164	0.472811	0.612218	0.707274	0.774865	0.803845	0.81936	0.356175	-1.65462	0.000362299	0.228821	0.884009	0.116739	0.193429	4.51786	1142.9	6.49642	FALSE	FALSE	FALSE	0.131976521890503
1	24854004	24804004	24904004	122	3	0.36378	117	0.0173214	0.368397	0.51474	0.618847	0.70945	0.776272	0.814123	0.835361	0.337544	-1.61206	0.000403002	0.227737	0.929829	0.128766	0.283073	4.15	346.54	2.01744	FALSE	FALSE	FALSE	0.132126511317733
1	24954004	24904004	25004004	117	4	0.37789	127	0.0177928	0.384177	0.551723	0.651744	0.733102	0.792735	0.810323	0.823878	0.32176	-1.74894	0.000430992	0.228311	0.86492	0.13544	0.145374	6.38333	17667.2	22.7685	FALSE	FALSE	FALSE	0.13214106327351
1	25054004	25004004	25104004	108	3	0.36283	118	0.0154321	0.369144	0.590852	0.705023	0.734824	0.758871	0.788858	0.805992	0.320919	-1.84046	0.000450058	0.225659	0.871367	0.151614	0.0855671	7.80769	41269	12.7739	FALSE	FALSE	FALSE	0.132348548418316
1	25154004	25104004	25204004	108	2	0.38049	82	0.0112392	0.474447	0.6192	0.730843	0.792057	0.835742	0.858176	0.880596	0.25842	-1.85224	0.000460402	0.2774	0.93328	0.162795	0.0370675	7.78571	77094.2	30.1968	FALSE	FALSE	FALSE	0.132404078267919
1	25254004	25204004	25304004	125	6	0.37098	135	0.013434	0.433378	0.596122	0.694054	0.745881	0.78746	0.821099	0.833388	0.298374	-1.96345	0.000508621	0.228619	0.919356	0.14473	0.0607956	6.67213	55511.2	15.8708	FALSE	FALSE	FALSE	0.132479332125134
1	25354004	25304004	25404004	126	3	0.40186	114	0.0146251	0.381843	0.568857	0.706212	0.766391	0.812365	0.846017	0.866179	0.293162	-1.89558	0.000510929	0.19508	0.943861	0.146951	0.0212067	6.13846	2454.94	4.73232	FALSE	FALSE	FALSE	0.132509718257527
1	25454004	25404004	25504004	127	7	0.37537	140	0.0148566	0.341883	0.486492	0.617382	0.671724	0.731889	0.766723	0.78917	0.370677	-1.79069	0.000435888	0.185306	0.891968	0.119417	0.0807596	7.25	38325.1	5.10932	FALSE	FALSE	FALSE	0.132602231848021
1	25554004	25504004	25604004	97	3	0.3927	108	0.0165986	0.309909	0.535363	0.663995	0.750821	0.797913	0.816033	0.857851	0.324016	-1.84461	0.000346458	0.190534	0.905325	0.134635	0.0754728	7.6383	91269.7	21.9116	FALSE	FALSE	FALSE	0.133659436373288
1	25654004	25604004	25704004	163	5	0.37773	147	0.0188293	0.362384	0.503168	0.621886	0.704778	0.776677	0.799034	0.810407	0.345952	-1.69267	0.00053107	0.214441	0.835191	0.122766	0.103063	7.33333	156076	88.9569	FALSE	FALSE	FALSE	0.133734695639751
1	25754004	25704004	25804004	178	5	0.38078	110	0.011448	0.340525	0.506161	0.652907	0.73665	0.798208	0.818917	0.86644	0.325742	-1.61308	0.000560232	0.230476	0.936426	0.14757	0.179393	8	199999	151.483	FALSE	FALSE	FALSE	0.133737299016204
1	25854004	25804004	25904004	218	6	0.37966	142	0.0155213	0.565184	0.710064	0.754762	0.794404	0.82808	0.853357	0.866394	0.232536	-0.790927	0.000695381	0.31984	0.932276	0.281715	0.601512	6.86239	159560	536.371	FALSE	FALSE	FALSE	0.133865651971592
1	25954004	25904004	26004004	124	4	0.3685	155	0.0243964	0.593153	0.694398	0.741038	0.789912	0.822527	0.83337	0.859198	0.238058	-1.21398	0.000457034	0.286182	0.869595	0.257924	0.395329	5.95385	112232	752.341	FALSE	FALSE	FALSE	0.13407963730856
1	26054004	26004004	26104004	81	3	0.40868	82	0.0123457	0.453563	0.627429	0.755878	0.829091	0.859264	0.887775	0.901881	0.240731	-1.94333	0.000565476	0.246277	0.951317	0.206073	0.0474332	7.64286	160572	61.5591	FALSE	FALSE	FALSE	0.134213795850985
1	26154004	26104004	26204004	92	9	0.39502	90	0.0130572	0.432644	0.642846	0.780826	0.85671	0.885914	0.900703	0.913708	0.226664	-1.91725	0.000457942	0.245536	0.955399	0.207346	0.0719033	6.8	174147	126.02	FALSE	FALSE	FALSE	0.134382414912271
1	26254004	26204004	26304004	42	3	0.38412	51	0.0134771	0.343573	0.606658	0.774496	0.817948	0.847984	0.86832	0.883553	0.265353	-2.12941	0.000187786	0.201535	0.864246	0.22458	-0.0250625	6.66667	162137	54.2454	FALSE	FALSE	FALSE	0.134448961606594
1	26354004	26304004	26404004	65	2	0.38067	66	0.0143203	0.322764	0.496667	0.639022	0.768729	0.812994	0.853217	0.875045	0.318795	-1.95396	0.00060884	0.21445	0.930735	0.152762	0.196184	8.03448	158750	15.6272	FALSE	FALSE	FALSE	0.134789336866968
1	26554004	26504004	26604004	182	2	0.3969	221	0.029304	0.350812	0.591686	0.673152	0.73281	0.773537	0.807334	0.83429	0.319482	-1.24763	0.000727286	0.213123	0.801009	0.191929	0.226776	7.24719	77991.1	62.8214	FALSE	FALSE	FALSE	0.134828176396103
1	26654004	26604004	26704004	152	6	0.36193	126	0.0129096	0.334269	0.553015	0.654454	0.746067	0.779975	0.81261	0.824815	0.327828	-1.36421	0.000474484	0.154479	0.855125	0.179119	0.139196	7.17333	146313	136.616	FALSE	FALSE	FALSE	0.135026158084382
1	26754004	26704004	26804004	247	2	0.40204	255	0.0407914	0.402064	0.549869	0.638843	0.67574	0.701923	0.722998	0.736197	0.367481	-0.729457	0.000838355	0.113488	0.669688	0.15875	0.335677	3	3069.53	53.4265	FALSE	FALSE	FALSE	0.135237219045052
1	26854004	26804004	26904004	355	1	0.41518	267	0.0246257	0.433414	0.559884	0.638659	0.685335	0.730556	0.755816	0.775609	0.345818	-1.12527	0.0010372	0.0846639	0.777	0.167859	0.305978	7.18079	6056.6	17.2739	FALSE	FALSE	FALSE	0.135499867155372
1	27054004	27004004	27104004	270	1	0.40616	177	0.0165618	0.439547	0.708501	0.792891	0.848873	0.875157	0.888414	0.899472	0.221021	-1.24292	0.000944608	0.166929	0.922797	0.248009	0.314231	7.47761	87649.8	34.8917	FALSE	FALSE	FALSE	0.135796615075601
1	27254004	27204004	27304004	104	1	0.41412	107	0.0122158	0.368578	0.633031	0.721229	0.781166	0.80433	0.827361	0.845805	0.288357	-1.22601	0.000358669	0.176851	0.861631	0.179983	0.306593	6.59259	13643	23.1	FALSE	FALSE	FALSE	0.135888075276243
1	27354004	27304004	27404004	185	4	0.40521	151	0.0156723	0.336321	0.616585	0.72694	0.792375	0.820044	0.835712	0.858701	0.287617	-1.34601	0.000666977	0.167519	0.851076	0.191346	0.145632	7.41758	153035	103.154	FALSE	FALSE	FALSE	0.13603808302214
1	27454004	27404004	27504004	161	6	0.3776	130	0.0173444	0.429672	0.724489	0.786446	0.819884	0.841476	0.868448	0.885598	0.234855	-1.09114	0.00066852	0.214767	0.917477	0.233211	0.340049	7.87805	190323	63.7299	FALSE	FALSE	FALSE	0.136313353744376
1	27554004	27504004	27604004	105	5	0.38255	89	0.0118598	0.372837	0.642833	0.763775	0.801973	0.834132	0.858031	0.880021	0.263771	-1.73246	0.000478473	0.254565	0.948657	0.207043	0.0210889	6.49091	36899.7	12.0197	FALSE	FALSE	FALSE	0.136336685083515
1	27654004	27604004	27704004	117	1	0.40636	127	0.0157501	0.516884	0.73897	0.832247	0.8602	0.87525	0.889359	0.897244	0.198549	-1.68941	0.000560423	0.346294	0.919003	0.23074	0.164284	7.31481	56957.8	17.8057	FALSE	FALSE	FALSE	0.136418809078081
1	27954004	27904004	28004004	153	1	0.41395	152	0.0136063	0.428765	0.619835	0.742463	0.78131	0.814608	0.838866	0.856231	0.273989	-1.67386	0.000625406	0.257723	0.91574	0.18599	0.0471769	5.94444	4794.11	6.61588	FALSE	FALSE	FALSE	0.136815155642678
1	28054004	28004004	28104004	109	2	0.40081	100	0.0118285	0.34927	0.554058	0.701546	0.780659	0.818368	0.842561	0.8566	0.299563	-1.47742	0.000445174	0.25045	0.914867	0.156603	0.0954451	5.92982	16970.8	8.7621	FALSE	FALSE	FALSE	0.136982461099211
1	28154004	28104004	28204004	139	4	0.40377	137	0.0149767	0.472549	0.701521	0.807756	0.840597	0.855919	0.882398	0.891636	0.221089	-1.60034	0.00056588	0.309227	0.932088	0.212924	0.125904	7.64789	80040.8	13.3379	FALSE	FALSE	FALSE	0.137141429725678
1	28354004	28304004	28404004	99	1	0.40537	143	0.0176609	0.496478	0.707042	0.774311	0.799849	0.821595	0.844858	0.857997	0.242553	-1.49245	0.000422171	0.303983	0.884992	0.194938	0.149798	3.89796	214.569	3.9693	FALSE	FALSE	FALSE	0.137386314713828
1	28554004	28504004	28604004	155	2	0.41339	137	0.0136336	0.449565	0.670062	0.797777	0.830673	0.848951	0.86486	0.87932	0.23697	-1.77748	0.000618874	0.290669	0.940993	0.215165	0.0939248	7.59211	100913	31.3961	FALSE	FALSE	FALSE	0.137584279345988
1	28954004	28904004	29004004	118	1	0.40999	84	0.00964716	0.354774	0.501151	0.615813	0.698929	0.777661	0.832123	0.864429	0.336446	-1.68826	0.000361503	0.175756	0.939446	0.130478	0.0841182	8.04918	148491	38.8824	FALSE	FALSE	FALSE	0.137791810489139
1	29054004	29004004	29104004	204	1	0.41752	125	0.0114687	0.310175	0.44351	0.569484	0.683078	0.7652	0.816172	0.839123	0.367608	-1.76026	0.00059796	0.154315	0.952891	0.132043	0.190872	8.13861	174137	36.9287	FALSE	FALSE	FALSE	0.137815046477978
1	29154004	29104004	29204004	121	5	0.37006	140	0.014034	0.253862	0.417963	0.509493	0.611149	0.681204	0.724342	0.759621	0.434624	-1.79711	0.000351985	0.158412	0.883765	0.108563	0.177378	6.66129	51032.9	9.60717	FALSE	FALSE	FALSE	0.137838179949724
1	29254004	29204004	29304004	286	5	0.40982	181	0.0188899	0.462012	0.557659	0.63698	0.702212	0.755482	0.784073	0.804528	0.328151	-0.815274	0.000881791	0.230982	0.814185	0.160618	2.86718	4.79286	199999	10387.3	FALSE	FALSE	FALSE	0.138284750614544
1	29354004	29304004	29404004	858	8	0.37497	199	0.0185454	0.428162	0.763925	0.820937	0.846739	0.865816	0.883052	0.88831	0.214723	0.903285	0.00268774	0.302876	0.653449	0.321804	7.80602	3	199999	32069.3	FALSE	FALSE	FALSE	0.138525519966169
1	29454004	29404004	29504004	120	9	0.36474	139	0.0149371	0.19826	0.370122	0.49275	0.597366	0.652045	0.689748	0.719936	0.468539	-1.93878	0.000626583	0.192464	0.861134	0.135486	0.400586	3.65	173332	7403.2	FALSE	FALSE	FALSE	0.138826132160201
1	29554004	29504004	29604004	199	8	0.35304	183	0.0200057	0.22391	0.40834	0.540416	0.643135	0.698943	0.732561	0.762699	0.427142	-1.56831	0.000627546	0.182764	0.821752	0.116164	0.460298	6.34653	22328.6	28.3839	FALSE	FALSE	FALSE	0.138866423404216
1	29654004	29604004	29704004	155	7	0.35571	133	0.0169608	0.444223	0.586564	0.662785	0.711667	0.753306	0.7876	0.814893	0.319852	-0.824976	0.000550538	0.231759	0.890021	0.196259	0.294182	7.5443	56472.3	14.8021	FALSE	FALSE	FALSE	0.13915425053476
1	29854004	29804004	29904004	141	2	0.40404	150	0.0259601	0.483837	0.625009	0.718694	0.788386	0.822253	0.845398	0.862791	0.264805	-0.676425	0.000495243	0.254342	0.895663	0.209025	0.335734	4.21429	5145.59	17.0901	FALSE	FALSE	FALSE	0.139239716928816
1	29954004	29904004	30004004	232	1	0.40225	190	0.0234494	0.61353	0.732157	0.794185	0.840418	0.868861	0.883901	0.898414	0.195505	-0.773593	0.000870241	0.268124	0.934399	0.292312	0.53468	6.86842	30136.6	28.0287	FALSE	FALSE	FALSE	0.139245866986557
1	30054004	30004004	30104004	104	3	0.40357	164	0.0305999	0.504597	0.67914	0.772103	0.800862	0.826878	0.841617	0.856045	0.245537	-0.598434	0.000424425	0.282801	0.853083	0.209251	0.636124	6.07692	31504.9	5.93761	FALSE	FALSE	FALSE	0.139262711419685
1	30354004	30304004	30404004	255	1	0.41276	176	0.0127266	0.305225	0.462007	0.578454	0.673253	0.763363	0.820795	0.850011	0.363842	-1.85868	0.000773633	0.159193	0.943303	0.126221	0.162325	8.144	80639.9	17.9596	FALSE	FALSE	FALSE	0.139504101521446
1	30454004	30404004	30504004	171	4	0.39162	187	0.0194196	0.216611	0.373886	0.492644	0.604715	0.685994	0.721613	0.778051	0.446641	-1.73415	0.000488377	0.156559	0.894661	0.10666	0.0654343	7.63218	75501.3	16.2587	FALSE	FALSE	FALSE	0.139745642917116
1	30554004	30504004	30604004	102	8	0.36326	80	0.00992724	0.30981	0.51655	0.681407	0.784305	0.829195	0.850317	0.867882	0.308647	-1.67755	0.000394	0.223133	0.946598	0.172658	0.11544	6.86792	7747.3	24.3209	FALSE	FALSE	FALSE	0.139845137185763
1	30654004	30604004	30704004	119	5	0.37947	132	0.0150098	0.259198	0.472873	0.627626	0.718074	0.768521	0.808829	0.825002	0.359983	-1.64394	0.000461728	0.218824	0.922046	0.145614	0.330719	4.15789	2665.73	3.23618	FALSE	FALSE	FALSE	0.139883593268179
1	30754004	30704004	30804004	176	2	0.40895	130	0.0128645	0.287912	0.491288	0.640286	0.741548	0.823012	0.860084	0.886878	0.324142	-1.5792	0.000599135	0.205645	0.933288	0.144277	0.820365	8.04545	70642.9	11.525	FALSE	FALSE	FALSE	0.139886823208687
1	30854004	30804004	30904004	154	3	0.39519	140	0.0132729	0.235738	0.430991	0.580113	0.680238	0.771825	0.850951	0.869353	0.368684	-1.69106	0.000506174	0.201162	0.913147	0.127951	0.449379	8.24359	111460	11.8238	FALSE	FALSE	FALSE	0.140094628303968
1	30954004	30904004	31004004	191	5	0.39138	189	0.0223913	0.223642	0.397549	0.555372	0.646112	0.723969	0.788436	0.81041	0.407787	-1.52134	0.000639587	0.169552	0.827936	0.113977	1.2395	6.55789	32888.6	125.914	FALSE	FALSE	FALSE	0.140292917909792
1	31054004	31004004	31104004	171	9	0.38168	123	0.0122844	0.271158	0.420275	0.543599	0.635949	0.718944	0.775948	0.801244	0.404697	-1.69815	0.000539705	0.201099	0.915965	0.11243	0.599351	4.37647	192.608	3.46924	FALSE	FALSE	FALSE	0.140738673920778
1	31154004	31104004	31204004	93	1	0.40111	102	0.0133901	0.223538	0.417708	0.599179	0.750434	0.791613	0.823192	0.856003	0.362619	-1.67552	0.000316757	0.215717	0.915455	0.145276	0.279047	6.38776	1433.58	4.13241	FALSE	FALSE	FALSE	0.141131003697374
1	31354004	31304004	31404004	158	4	0.41085	183	0.0201815	0.278714	0.527895	0.633858	0.708548	0.753567	0.78791	0.821388	0.355446	-1.51255	0.000527281	0.222806	0.893092	0.1267	0.243828	3.8625	195.747	3.77422	FALSE	FALSE	FALSE	0.141621346122512
1	31454004	31404004	31504004	115	3	0.36663	142	0.011977	0.289317	0.443946	0.556992	0.653522	0.733982	0.7612	0.782062	0.396997	-1.76329	0.000373803	0.189778	0.888618	0.114634	0.189309	4.6	2217.28	7.28424	FALSE	FALSE	FALSE	0.141749633604363
1	31554004	31504004	31604004	136	5	0.36953	163	0.0178043	0.225787	0.378233	0.501428	0.617838	0.693664	0.738809	0.769114	0.439304	-1.72323	0.000474205	0.206633	0.831021	0.116392	0.157744	7.2029	19063.1	5.90298	FALSE	FALSE	FALSE	0.141871339938881
1	31654004	31604004	31704004	155	5	0.36323	187	0.0200041	0.212276	0.363505	0.486221	0.569103	0.644563	0.719282	0.76012	0.463561	-1.68166	0.000455979	0.187714	0.855245	0.100263	0.369719	4.61538	449.62	2.58909	FALSE	FALSE	FALSE	0.142088517612474
1	31754004	31704004	31804004	108	4	0.39078	86	0.013161	0.349469	0.508477	0.60174	0.689087	0.755715	0.799295	0.847826	0.34977	-1.61069	0.000334322	0.213977	0.927874	0.12351	0.201854	8.07273	48720.5	8.79505	FALSE	FALSE	FALSE	0.142448326867101
1	31854004	31804004	31904004	77	6	0.3613	99	0.0269542	0.606447	0.684915	0.739312	0.78655	0.825258	0.859445	0.883482	0.230656	-0.899692	0.000270628	0.267536	0.879655	0.224865	0.86711	7.65789	158192	41.004	FALSE	FALSE	FALSE	0.142720363647003
1	31954004	31904004	32004004	265	7	0.37887	181	0.0187493	0.466906	0.615141	0.678478	0.738251	0.76985	0.805232	0.83468	0.29878	-0.843405	0.000855459	0.155023	0.887687	0.156284	0.516208	7.88722	125612	139.019	FALSE	FALSE	FALSE	0.142772745605573
1	32054004	32004004	32104004	535	4	0.39744	200	0.0219127	0.721976	0.809947	0.832014	0.853364	0.872814	0.886799	0.902231	0.160122	1.20891	0.00221224	0.473984	0.884055	0.38209	11.0656	4.63396	77674.5	6794.9	FALSE	FALSE	FALSE	0.142776523004883
1	32154004	32104004	32204004	585	7	0.39909	276	0.0327259	0.73867	0.774737	0.799619	0.819438	0.831984	0.84468	0.854268	0.190943	2.50031	0.00288483	0.492908	0.835875	0.404656	10.1959	4.81973	147004	5843.94	FALSE	FALSE	FALSE	0.14294846855836
1	32254004	32204004	32304004	273	5	0.38809	224	0.0219089	0.718276	0.77228	0.813839	0.850043	0.87061	0.887554	0.900384	0.169573	-0.265911	0.00122967	0.460748	0.902367	0.380012	1.50509	6.39416	100914	382.756	FALSE	FALSE	FALSE	0.143131719028148
1	32354004	32304004	32404004	220	1	0.40236	259	0.0465695	0.736942	0.778042	0.816821	0.831314	0.844842	0.854023	0.863744	0.182039	-0.129171	0.000963899	0.391283	0.878294	0.317837	1.22394	6.2037	83954.4	116.632	FALSE	FALSE	FALSE	0.143153146965557
1	32454004	32404004	32504004	337	7	0.37656	238	0.020193	0.516709	0.743574	0.781296	0.81867	0.846379	0.860833	0.872041	0.222928	0.0565174	0.0016203	0.350911	0.841344	0.28912	2.00801	6.41765	191026	924.979	FALSE	TRUE	FALSE	0.143195305602948
1	32554004	32504004	32604004	384	1	0.40487	248	0.0225367	0.644822	0.72542	0.797092	0.830189	0.851173	0.86998	0.882978	0.199764	0.729201	0.00155718	0.27584	0.80747	0.391836	2.02204	6	199999	2915.22	FALSE	FALSE	FALSE	0.143257895768326
1	32654004	32604004	32704004	314	8	0.39089	185	0.0195289	0.401349	0.563437	0.689535	0.766017	0.796964	0.815757	0.833945	0.304714	0.596017	0.00139096	0.28586	0.705271	0.215673	6.71784	6	199999	2406.82	FALSE	FALSE	FALSE	0.143522421674752
1	32754004	32704004	32804004	102	6	0.36636	131	0.0158466	0.303915	0.418382	0.521685	0.61012	0.686127	0.74116	0.766528	0.421726	-1.77414	0.000382209	0.210237	0.835884	0.114294	0.412255	7.88462	164142	142.947	FALSE	FALSE	FALSE	0.143558937434624
1	32854004	32804004	32904004	218	8	0.38	200	0.0247533	0.42997	0.572756	0.660919	0.728035	0.765476	0.803146	0.828635	0.315866	-0.849438	0.000943897	0.161725	0.83086	0.206064	0.869836	4.60748	946.902	15.7432	FALSE	FALSE	FALSE	0.143736552852331
1	32954004	32904004	33004004	99	2	0.39889	176	0.0546979	0.706425	0.797512	0.831132	0.858012	0.87513	0.891854	0.897427	0.163215	0.0284729	0.000450928	0.103597	0.867752	0.36187	1.57087	4.90196	92896.4	690.637	FALSE	FALSE	FALSE	0.143757043704528
1	33054004	33004004	33104004	259	2	0.40881	237	0.0444137	0.811589	0.856027	0.882408	0.901143	0.914913	0.928535	0.933539	0.110264	0.878541	0.00121508	0.0606175	0.919393	0.530152	3.86275	5.10769	199049	1938.45	FALSE	FALSE	FALSE	0.143781839457565
1	33154004	33104004	33204004	373	4	0.40008	293	0.0468579	0.451831	0.665141	0.745168	0.770518	0.789015	0.806612	0.821787	0.278561	-0.143684	0.00156966	0.200372	0.758578	0.237805	1.84911	5.23936	199999	4225.16	FALSE	FALSE	FALSE	0.143802094652798
1	33254004	33204004	33304004	420	5	0.37418	188	0.0224918	0.785255	0.839473	0.861434	0.879446	0.89303	0.906845	0.915673	0.131264	1.13335	0.00182519	0.271529	0.848687	0.514781	10.3985	3.5314	65229.8	10007.7	FALSE	FALSE	FALSE	0.144013144999004
1	33354004	33304004	33404004	321	1	0.39116	189	0.0130684	0.454777	0.64557	0.747845	0.816703	0.850492	0.875513	0.896039	0.244723	-1.26332	0.0011471	0.241336	0.864977	0.286053	0.970001	5.34375	118347	2480.11	FALSE	FALSE	FALSE	0.144181478170862
1	33454004	33404004	33504004	193	5	0.38515	147	0.0157396	0.530449	0.693172	0.778977	0.829925	0.869301	0.89823	0.908581	0.213052	-0.722751	0.000870504	0.156382	0.901065	0.275642	1.11636	6.05155	163400	1243.28	FALSE	FALSE	FALSE	0.144384273180617
1	33554004	33504004	33604004	237	8	0.37538	165	0.0181249	0.410076	0.565547	0.691257	0.748016	0.784625	0.813896	0.835657	0.307275	-0.387579	0.00107538	0.144136	0.697675	0.203926	1.83381	6.4322	122512	528.164	FALSE	FALSE	FALSE	0.144449039012488
1	33654004	33604004	33704004	111	3	0.36969	126	0.0186979	0.310543	0.492046	0.640472	0.712982	0.78211	0.845748	0.865993	0.335729	-1.64497	0.000376774	0.20824	0.903221	0.128026	0.339114	4.82143	16925.3	9.93596	FALSE	FALSE	FALSE	0.144467081131441
1	33754004	33704004	33804004	89	4	0.37858	86	0.0102466	0.286776	0.527233	0.709407	0.806117	0.840311	0.861834	0.882731	0.297942	-1.94742	0.000372448	0.219573	0.936945	0.162279	0.416935	6.08511	14794	16.6297	FALSE	FALSE	FALSE	0.144496408490662
1	33854004	33804004	33904004	105	4	0.3713	110	0.0148547	0.271434	0.517999	0.716562	0.802216	0.824811	0.843076	0.858646	0.309322	-1.88133	0.000470887	0.241579	0.892412	0.165928	0.554874	7.5098	175362	55.7696	FALSE	FALSE	FALSE	0.144554200320427
1	33954004	33904004	34004004	94	5	0.37336	108	0.0169945	0.398376	0.631618	0.753291	0.790122	0.816474	0.837433	0.856405	0.273754	-1.97099	0.000432631	0.263011	0.900252	0.194936	0.311838	7.04348	51745	28.7807	FALSE	FALSE	FALSE	0.14472530152732
1	34054004	34004004	34104004	147	11	0.37643	150	0.0243015	0.536226	0.666216	0.734602	0.7992	0.821368	0.838998	0.854745	0.249806	-1.13907	0.000775905	0.151532	0.822617	0.239473	1.19697	6.4	59222.7	212.755	FALSE	FALSE	FALSE	0.14488385719794
1	34154004	34104004	34204004	91	2	0.36366	95	0.0148594	0.291625	0.520831	0.703394	0.748528	0.785422	0.810927	0.835562	0.329102	-1.87956	0.000408033	0.183553	0.907056	0.15372	0.25407	6.97826	115430	75.6948	FALSE	FALSE	FALSE	0.145276042458649
1	34254004	34204004	34304004	130	3	0.38482	159	0.0190614	0.373465	0.483347	0.589538	0.680042	0.749362	0.781725	0.799065	0.363351	-1.6084	0.000506318	0.160634	0.835175	0.130339	0.498409	5.73438	30288.9	36.1011	FALSE	FALSE	FALSE	0.146019385990618
1	34354004	34304004	34404004	116	6	0.36763	166	0.0137714	0.261899	0.429787	0.559652	0.667658	0.701686	0.732915	0.761683	0.412103	-1.69831	0.00041946	0.210588	0.857905	0.140871	0.252045	5.08772	1913.15	19.8317	FALSE	FALSE	FALSE	0.146501861085544
1	34454004	34404004	34504004	193	3	0.37578	183	0.0171408	0.277227	0.412137	0.536448	0.637436	0.714305	0.776843	0.825241	0.402909	-1.61517	0.000561083	0.165101	0.916059	0.113429	0.348655	8.01042	92259.9	4.86798	FALSE	FALSE	FALSE	0.146946922361037
1	34554004	34504004	34604004	190	3	0.39528	198	0.0148957	0.217082	0.383321	0.486563	0.547893	0.638936	0.679847	0.733337	0.473289	-1.69873	0.00051698	0.15848	0.880603	0.103183	0.227133	8	101512	34.1583	FALSE	FALSE	FALSE	0.14694960750097
1	34654004	34604004	34704004	99	3	0.38965	124	0.0139127	0.1959	0.373844	0.510748	0.604677	0.674595	0.72254	0.744663	0.45329	-1.86037	0.000356778	0.131807	0.884617	0.105008	0.258952	7.66038	171838	64.1138	FALSE	FALSE	FALSE	0.147169827713978
1	34754004	34704004	34804004	122	2	0.37476	72	0.00706258	0.261816	0.485361	0.613277	0.719716	0.81888	0.847531	0.875753	0.339667	-1.89733	0.000343932	0.169259	0.96982	0.17564	0.166585	6.73684	129857	233.894	FALSE	FALSE	FALSE	0.147230867671549
1	34854004	34804004	34904004	108	2	0.39282	84	0.00832751	0.234816	0.424991	0.544219	0.633786	0.722164	0.793408	0.828127	0.402641	-1.84839	0.000336954	0.171467	0.955178	0.141353	0.210547	6.875	27955.5	24.8155	FALSE	FALSE	FALSE	0.147258444790986
1	34954004	34904004	35004004	94	2	0.39405	148	0.0149873	0.183187	0.312432	0.421571	0.510113	0.578692	0.639162	0.682893	0.524564	-1.76956	0.000279358	0.174384	0.7916	0.0819336	0.0654031	3.84783	141.644	3.5431	FALSE	FALSE	FALSE	0.147270988393396
1	35054004	35004004	35104004	211	2	0.40344	148	0.0125488	0.298894	0.477983	0.56025	0.637754	0.704087	0.750661	0.812098	0.394039	-1.67066	0.000707793	0.205736	0.903539	0.115123	0.290359	4.74528	3960.58	3.47505	FALSE	FALSE	FALSE	0.147537930163075
1	35154004	35104004	35204004	192	4	0.39561	145	0.0109408	0.292664	0.498875	0.606327	0.698622	0.761391	0.814391	0.84808	0.354236	-1.65293	0.000534344	0.161213	0.907244	0.165239	0.215576	7.53061	146398	279.7	FALSE	FALSE	FALSE	0.147715189183285
1	35254004	35204004	35304004	253	3	0.38055	117	0.00735824	0.382961	0.557352	0.626651	0.686734	0.750042	0.798565	0.834453	0.337606	-1.50334	0.000589869	0.166821	0.941021	0.227558	0.33187	7	199999	854.685	FALSE	FALSE	FALSE	0.14771841413764
1	35354004	35304004	35404004	257	5	0.38957	167	0.0104251	0.250296	0.465541	0.548903	0.612009	0.667931	0.718112	0.748164	0.427006	-1.36598	0.000652944	0.179918	0.869343	0.123565	0.355825	7.79389	146476	148.552	FALSE	FALSE	FALSE	0.147918919997245
1	35454004	35404004	35504004	249	4	0.39088	206	0.0182112	0.495926	0.633093	0.688728	0.739847	0.779595	0.811195	0.838871	0.287535	-1.12722	0.00081876	0.138096	0.914316	0.147606	0.229821	5.8374	50646.6	7.27508	FALSE	FALSE	FALSE	0.148009167615823
1	35554004	35504004	35604004	306	6	0.38918	154	0.0114893	0.685757	0.75393	0.790467	0.82437	0.85651	0.877141	0.903429	0.186914	-0.489783	0.000937127	0.331763	0.956315	0.331675	1.20996	6.41558	124089	976.433	FALSE	FALSE	FALSE	0.148181064180881
1	35654004	35604004	35704004	407	8	0.39762	215	0.0195324	0.64262	0.72769	0.791	0.825493	0.849514	0.869152	0.879128	0.202201	-0.400717	0.00141091	0.340852	0.914775	0.357363	1.24748	6.39109	199999	1671.83	FALSE	FALSE	FALSE	0.148286994049696
1	35754004	35704004	35804004	237	3	0.36328	145	0.0161081	0.344053	0.518381	0.646337	0.701195	0.739505	0.770113	0.800289	0.354304	-1.07551	0.000759621	0.23786	0.83924	0.155626	0.646657	8.00855	198290	158.177	FALSE	FALSE	FALSE	0.148457513896594
1	35854004	35804004	35904004	180	4	0.38222	166	0.0147449	0.211455	0.393774	0.543985	0.655662	0.726186	0.774306	0.805405	0.412747	-1.93319	0.000585296	0.137153	0.887231	0.125715	0.589856	8.52174	189140	30.954	FALSE	FALSE	FALSE	0.148810363120168
1	35954004	35904004	36004004	201	2	0.37454	110	0.00816671	0.383813	0.540515	0.636013	0.702491	0.780181	0.828245	0.866952	0.323113	-1.63933	0.000546755	0.167095	0.945402	0.188933	0.336129	7.82353	195361	264.99	FALSE	FALSE	FALSE	0.148986048847891
1	36054004	36004004	36104004	311	3	0.34946	196	0.0152885	0.296447	0.445398	0.52981	0.604716	0.640477	0.666329	0.694198	0.446089	-0.896534	0.000983416	0.141573	0.757252	0.130201	0.720868	5.5817	134428	1259.41	FALSE	FALSE	FALSE	0.149183413294366
1	36154004	36104004	36204004	267	8	0.38386	154	0.0200221	0.554833	0.655863	0.730124	0.776864	0.806388	0.82993	0.846686	0.257045	-1.1744	0.00104984	0.198996	0.847278	0.304536	0.917063	6.26119	173396	844.61	FALSE	FALSE	FALSE	0.149247365660625
1	36254004	36204004	36304004	326	5	0.38348	200	0.021974	0.611352	0.727374	0.783354	0.821694	0.854263	0.87498	0.895401	0.204512	-0.815217	0.00116093	0.245254	0.925145	0.318656	0.897615	6.34356	199999	1520.77	FALSE	FALSE	FALSE	0.149533776482703
1	36354004	36304004	36404004	392	5	0.40222	213	0.0233122	0.671825	0.760452	0.819985	0.858299	0.884846	0.908312	0.923423	0.167551	-0.658503	0.0013895	0.248119	0.933748	0.361979	1.12169	5.22843	199999	7102.65	FALSE	FALSE	FALSE	0.149766643148434
1	36454004	36404004	36504004	534	6	0.37925	160	0.0143924	0.561825	0.65201	0.717183	0.774585	0.808707	0.831994	0.853815	0.257126	0.512846	0.0016112	0.187887	0.680278	0.320695	3.50726	4	199999	13108.6	FALSE	FALSE	FALSE	0.149779041103826
1	36554004	36504004	36604004	242	4	0.36599	191	0.0170227	0.413733	0.563992	0.654214	0.718094	0.76224	0.794158	0.821546	0.324575	-0.945038	0.000854061	0.153814	0.714743	0.201493	1.551	4.5042	155763	4260.97	FALSE	FALSE	FALSE	0.14997730091167
1	36654004	36604004	36704004	222	4	0.38232	223	0.0398606	0.402798	0.522331	0.599631	0.662504	0.696641	0.719327	0.740184	0.379512	-0.526043	0.000804045	0.213901	0.66168	0.208383	1.42096	3.9646	199999	7528.4	FALSE	FALSE	FALSE	0.150114189318761
1	36754004	36704004	36804004	434	8	0.37638	218	0.0168681	0.7687	0.817737	0.853672	0.871321	0.882218	0.889182	0.89595	0.145889	-0.323483	0.00149827	0.379379	0.877979	0.502695	8.35158	2.65899	55575	13818.4	FALSE	FALSE	FALSE	0.150120769996514
1	36854004	36804004	36904004	189	1	0.35493	171	0.0131776	0.295572	0.55036	0.644677	0.712338	0.775033	0.818235	0.858351	0.335062	-1.68059	0.000572317	0.161072	0.908399	0.163692	0.472138	7.16842	115604	421.075	FALSE	FALSE	FALSE	0.150145884792861
1	36954004	36904004	37004004	109	6	0.39047	118	0.0122324	0.283034	0.456055	0.619716	0.700105	0.773673	0.828687	0.84902	0.355673	-1.96974	0.000358382	0.178605	0.882209	0.129204	0.476106	7.55556	139721	173.487	FALSE	FALSE	FALSE	0.150162588912675
1	37054004	37004004	37104004	103	4	0.36537	107	0.0116627	0.372056	0.589563	0.670893	0.746002	0.81705	0.842525	0.868268	0.299092	-1.95	0.000382116	0.225216	0.916994	0.143933	0.49505	6.59615	78549.6	6.87884	FALSE	FALSE	FALSE	0.150264360075872
1	37154004	37104004	37204004	107	6	0.37855	130	0.0126962	0.386409	0.531118	0.650453	0.725906	0.771124	0.80328	0.843359	0.326907	-2.03505	0.000417958	0.222096	0.911227	0.142733	0.0408951	5.77778	3923.32	3.40879	FALSE	FALSE	FALSE	0.150312031297139
1	37254004	37204004	37304004	96	5	0.38521	86	0.00805818	0.546941	0.640542	0.712481	0.777995	0.818433	0.834868	0.862721	0.258003	-2.02621	0.000415337	0.245228	0.938895	0.158409	0.250425	8.19149	93434.7	12.0194	FALSE	FALSE	FALSE	0.150362869937941
1	37354004	37304004	37404004	99	1	0.41558	113	0.0142939	0.424792	0.547364	0.634344	0.701986	0.756916	0.815164	0.836342	0.326156	-1.90836	0.000397332	0.196329	0.894453	0.120329	0.240019	8.15385	139055	23.9778	FALSE	FALSE	FALSE	0.150389359803882
1	37454004	37404004	37504004	131	1	0.39792	127	0.0121465	0.500502	0.586316	0.668251	0.744487	0.805955	0.845657	0.873616	0.282174	-1.83362	0.000469484	0.224928	0.942077	0.144916	0.253598	7.87692	171339	62.1518	FALSE	FALSE	FALSE	0.150482622526151
1	37554004	37504004	37604004	97	6	0.39873	76	0.00868832	0.515418	0.628953	0.72415	0.780873	0.851711	0.879487	0.903795	0.245087	-1.98276	0.000343941	0.215893	0.929973	0.152476	0.175492	8	194868	92.4405	FALSE	FALSE	FALSE	0.150553690798993
1	37654004	37604004	37704004	142	6	0.38318	94	0.00788378	0.378594	0.498469	0.608201	0.700769	0.780579	0.869393	0.883426	0.325796	-1.98484	0.000438381	0.18264	0.940834	0.141744	0.109874	8	196066	89.6922	FALSE	FALSE	FALSE	0.150879982141509
1	37754004	37704004	37804004	175	2	0.41334	155	0.0134052	0.407143	0.514275	0.618402	0.718231	0.804884	0.84814	0.873796	0.316447	-1.83913	0.000522491	0.181374	0.90922	0.133092	0.00205496	7.76136	155876	144.815	FALSE	FALSE	FALSE	0.150903420717604
1	37854004	37804004	37904004	154	3	0.39767	85	0.00820877	0.38357	0.510829	0.633817	0.74433	0.830993	0.886411	0.906234	0.300545	-1.94693	0.000491772	0.174022	0.947961	0.145247	-0.0268813	7.98684	199999	207.843	FALSE	FALSE	FALSE	0.150912519174395
1	37954004	37904004	38004004	115	4	0.37254	73	0.00787531	0.396339	0.535539	0.651119	0.769004	0.81626	0.870254	0.898236	0.29475	-1.88422	0.000404211	0.17913	0.97136	0.155842	0.0473402	7.85965	121613	94.4073	FALSE	FALSE	FALSE	0.150916252911446
1	38054004	38004004	38104004	162	6	0.36573	158	0.0128504	0.35198	0.475131	0.585256	0.663781	0.743848	0.787011	0.833503	0.365641	-1.81688	0.00052235	0.207369	0.892334	0.118425	0.234455	8.39024	120415	5.48437	FALSE	FALSE	FALSE	0.151048672997805
1	38154004	38104004	38204004	184	5	0.38686	150	0.0171931	0.328495	0.514122	0.589939	0.653873	0.698536	0.746577	0.791282	0.382454	-1.8693	0.00070319	0.188356	0.840922	0.10704	0.248316	7.90426	50342.2	10.9281	FALSE	FALSE	FALSE	0.151261261680971
1	38254004	38204004	38304004	181	3	0.39639	157	0.0152889	0.37862	0.522753	0.638082	0.715621	0.748239	0.798919	0.829792	0.338282	-1.78471	0.000541287	0.188044	0.897992	0.125427	0.815891	7.36782	73790.7	12.3833	FALSE	FALSE	FALSE	0.151453268281262
1	38354004	38304004	38404004	112	6	0.38252	167	0.0169025	0.318625	0.454753	0.576474	0.650512	0.706299	0.74845	0.780503	0.394912	-1.96352	0.000388505	0.199187	0.842723	0.116338	0.131869	6.46552	24654.6	6.11531	FALSE	FALSE	FALSE	0.151723938393781
1	38454004	38404004	38504004	122	2	0.39504	133	0.011496	0.335845	0.487995	0.60143	0.660841	0.704511	0.735423	0.759193	0.387823	-1.73086	0.000454813	0.227731	0.892553	0.129353	0.358028	5.23333	780.547	2.59953	FALSE	FALSE	FALSE	0.151815027601493
1	38554004	38504004	38604004	107	2	0.39798	99	0.0125786	0.300833	0.525472	0.656945	0.767265	0.854899	0.907408	0.92291	0.294895	-1.89001	0.000397542	0.21458	0.974677	0.169773	0.470924	6.56364	7746.6	6.1605	FALSE	FALSE	FALSE	0.152113145849556
1	38654004	38604004	38704004	89	8	0.39386	102	0.0134973	0.380168	0.537876	0.665733	0.724491	0.76086	0.785916	0.803755	0.334457	-1.90077	0.000328092	0.210456	0.895233	0.138202	0.375365	6.81395	43281.3	5.83521	FALSE	FALSE	FALSE	0.152140773369637
1	38754004	38704004	38804004	118	5	0.37869	210	0.0321927	0.404396	0.560989	0.66866	0.711643	0.749375	0.776398	0.789901	0.334091	-1.82211	0.00047981	0.203193	0.800697	0.133812	0.445401	3.98276	555.293	3.53161	FALSE	FALSE	FALSE	0.152187995131278
1	38854004	38804004	38904004	85	3	0.37707	156	0.0282649	0.276189	0.456375	0.5481	0.635154	0.702353	0.729428	0.755848	0.413793	-1.53569	0.000261453	0.178357	0.74427	0.115615	0.341195	2.4	2291.52	23.0209	FALSE	FALSE	FALSE	0.15220048111697
1	38954004	38904004	39004004	148	3	0.39935	124	0.0166582	0.450726	0.68001	0.749627	0.811309	0.851063	0.885706	0.903334	0.238318	-1.25192	0.00043624	0.238169	0.950285	0.24711	0.280006	7.79167	169727	119.862	FALSE	FALSE	FALSE	0.15220152553791
1	39054004	39004004	39104004	229	1	0.39992	168	0.014611	0.391984	0.609196	0.707741	0.788799	0.839879	0.866653	0.882396	0.273336	-1.23365	0.0006618	0.223052	0.935506	0.21167	0.588716	7.92241	186097	130.673	FALSE	FALSE	FALSE	0.152308513571503
1	39154004	39104004	39204004	295	1	0.40373	190	0.0153502	0.394499	0.613763	0.701165	0.774486	0.834998	0.872115	0.888582	0.274342	-1.35019	0.000842529	0.23406	0.933966	0.211219	0.924115	7.97279	194261	110.065	FALSE	FALSE	FALSE	0.152346857531591
1	39354004	39304004	39404004	287	1	0.40597	210	0.0180352	0.345923	0.587721	0.689972	0.770225	0.823811	0.861434	0.871028	0.292841	-1.4265	0.00113016	0.230771	0.91018	0.177937	1.22414	7.79592	181157	78.9795	FALSE	FALSE	FALSE	0.152376347026309
1	39554004	39504004	39604004	156	1	0.41471	151	0.0152798	0.368538	0.541205	0.639844	0.711138	0.776275	0.828162	0.849166	0.326525	-1.5531	0.000519305	0.240898	0.923996	0.149958	0.400016	5.66667	69495.6	15.4871	FALSE	FALSE	FALSE	0.152726500417819
1	39754004	39704004	39804004	167	3	0.39828	155	0.0152149	0.327665	0.49682	0.621152	0.719445	0.815621	0.866842	0.877193	0.325038	-1.61414	0.000525854	0.217308	0.92424	0.143702	0.543311	6.45783	4717.45	8.77204	FALSE	FALSE	FALSE	0.152832434512569
1	39854004	39804004	39904004	120	5	0.39485	101	0.0142034	0.367999	0.504666	0.629816	0.735501	0.820527	0.848942	0.869461	0.317584	-1.80902	0.000451346	0.235946	0.947867	0.149776	0.227298	6.41935	33156.4	4.92346	FALSE	FALSE	FALSE	0.152913445390583
1	40154004	40104004	40204004	303	1	0.41979	233	0.0180999	0.366886	0.501383	0.614659	0.715202	0.802176	0.852345	0.868961	0.325484	-1.64829	0.000967515	0.219505	0.897623	0.134899	0.985651	4.36424	377.659	4.48766	FALSE	FALSE	FALSE	0.152943754521904
1	40654004	40604004	40704004	218	2	0.41702	167	0.0141942	0.356401	0.49545	0.620221	0.724371	0.809154	0.859148	0.876954	0.322614	-1.62028	0.000727733	0.230968	0.933069	0.147493	0.763269	5.82243	1397.41	4.33867	FALSE	FALSE	FALSE	0.1531898346663
1	40754004	40704004	40804004	154	1	0.41294	188	0.0232786	0.41534	0.533551	0.626171	0.715609	0.785954	0.827746	0.847263	0.321195	-1.67448	0.00052644	0.222331	0.874031	0.132531	0.294977	3.34177	155.516	1.19956	FALSE	FALSE	FALSE	0.153245492922162
1	40854004	40804004	40904004	140	1	0.40048	175	0.0219227	0.377402	0.511569	0.622047	0.719757	0.808547	0.844992	0.852165	0.32336	-1.73641	0.000517792	0.222958	0.8507	0.12757	0.400984	3.9403	441.729	3.82551	FALSE	FALSE	FALSE	0.153386192282821
1	40954004	40904004	41004004	121	3	0.40664	187	0.0313946	0.371203	0.495061	0.607638	0.698915	0.755713	0.799331	0.813497	0.351235	-1.44389	0.00039446	0.222097	0.840758	0.118122	0.501285	4.09524	338.261	6.25308	FALSE	FALSE	FALSE	0.153505919456429
1	41054004	41004004	41104004	164	3	0.42257	147	0.0164136	0.323483	0.470077	0.583279	0.674371	0.761479	0.82458	0.853493	0.358463	-1.64597	0.000528618	0.219588	0.93087	0.13238	0.457487	5.4878	1354.19	5.09448	FALSE	FALSE	FALSE	0.153513460536759
1	41154004	41104004	41204004	172	1	0.41599	192	0.0183926	0.265378	0.451524	0.583483	0.713081	0.798888	0.830111	0.847634	0.358557	-1.65953	0.000525878	0.182198	0.884716	0.140918	0.617163	6.32558	3818.58	8.52159	FALSE	FALSE	FALSE	0.153625119287191
1	41254004	41204004	41304004	202	2	0.41506	193	0.0179385	0.331618	0.474746	0.601358	0.707881	0.787263	0.82454	0.842051	0.347221	-1.62251	0.000626444	0.217826	0.909855	0.133338	0.745395	4.23762	271.721	2.07865	FALSE	FALSE	FALSE	0.153776637502198
1	41554004	41504004	41604004	163	1	0.40221	137	0.0141992	0.329676	0.471069	0.589855	0.69156	0.774246	0.841087	0.860399	0.348873	-1.63936	0.000523931	0.203215	0.900637	0.130341	0.667568	5.29762	1010.41	8.60316	FALSE	FALSE	FALSE	0.153943524229948
1	41754004	41704004	41804004	92	1	0.39874	85	0.011895	0.367123	0.52602	0.657002	0.779386	0.87624	0.896714	0.909146	0.284053	-1.57187	0.000301063	0.223964	0.949355	0.16056	0.415732	8.06818	116201	19.4949	FALSE	FALSE	FALSE	0.154076773402265
1	41854004	41804004	41904004	131	2	0.39157	89	0.00998608	0.28518	0.443903	0.596396	0.73692	0.809829	0.861829	0.891671	0.339182	-1.76678	0.000407323	0.198018	0.964297	0.151625	0.338382	7.87879	83266.6	17.9485	FALSE	FALSE	FALSE	0.154120516834906
1	41954004	41904004	42004004	39	1	0.38761	81	0.0235446	0.259302	0.419532	0.549837	0.668462	0.743405	0.795648	0.819617	0.392028	-1.66769	0.000183997	0.196604	0.9064	0.108118	0.599625	1.09524	45.9959	1.1039	FALSE	FALSE	FALSE	0.154222395905123
1	42154004	42104004	42204004	143	6	0.38408	130	0.0153934	0.359967	0.488942	0.59809	0.686915	0.758788	0.786168	0.822993	0.356877	-1.68166	0.000479076	0.216227	0.928219	0.131356	0.339504	4.73913	371.391	3.24816	FALSE	FALSE	FALSE	0.154256598437131
1	42254004	42204004	42304004	121	3	0.38308	134	0.0142419	0.350697	0.506014	0.628385	0.710365	0.749428	0.785708	0.807893	0.351644	-1.87602	0.000469552	0.182446	0.896881	0.12432	0.456905	6.77778	87751.9	825.821	FALSE	FALSE	FALSE	0.1543308574924
1	42354004	42304004	42404004	629	6	0.39449	173	0.0142084	0.794318	0.854087	0.874266	0.89324	0.907468	0.920059	0.929513	0.11815	-0.328956	0.0018611	0.29762	0.952012	0.609415	3.69682	3	54349	19621.4	FALSE	FALSE	FALSE	0.154357561571133
1	42454004	42404004	42504004	141	7	0.38444	125	0.010616	0.210243	0.345165	0.477942	0.572642	0.687303	0.774189	0.824584	0.44399	-1.91707	0.000414651	0.153686	0.903357	0.121215	0.511422	4.61429	199627	5146.23	FALSE	FALSE	FALSE	0.154472330266266
1	42554004	42504004	42604004	179	1	0.41967	94	0.00776501	0.317968	0.504805	0.619462	0.694203	0.772065	0.825771	0.864893	0.342976	-1.74432	0.000481281	0.179642	0.946467	0.151401	0.381294	7.66292	199999	301.569	FALSE	FALSE	FALSE	0.154552384429832
1	42654004	42604004	42704004	155	4	0.39232	104	0.0101846	0.330596	0.51267	0.636788	0.727507	0.778443	0.821057	0.845353	0.33537	-1.5573	0.000581009	0.183789	0.905341	0.147979	0.392918	7.05063	172047	330.343	FALSE	FALSE	FALSE	0.154666745893426
1	42754004	42704004	42804004	165	2	0.40929	163	0.013036	0.287848	0.47411	0.615782	0.678367	0.751721	0.806936	0.842215	0.363289	-1.61504	0.000605534	0.144303	0.910101	0.141163	0.648221	7.92683	170777	180.962	FALSE	FALSE	FALSE	0.154796172734687
1	42854004	42804004	42904004	187	3	0.38929	136	0.0101571	0.304009	0.444008	0.572084	0.652261	0.720389	0.764691	0.817335	0.389318	-1.82373	0.000612704	0.167859	0.919953	0.131892	0.350443	7.46316	88605.1	189.728	FALSE	FALSE	FALSE	0.15486654427925
1	42954004	42904004	43004004	116	2	0.41023	114	0.0121449	0.418127	0.577594	0.663474	0.743912	0.791633	0.828418	0.851472	0.303624	-1.99941	0.000493991	0.215416	0.916264	0.13901	0.0210738	5.07143	18382.6	2.6078	FALSE	FALSE	FALSE	0.154902133836981
1	43054004	43004004	43104004	124	5	0.38694	138	0.0187665	0.417379	0.592359	0.664252	0.734639	0.799842	0.842919	0.862759	0.297979	-1.75415	0.000490425	0.218189	0.928154	0.146064	0.0522969	3.39344	151.432	2.08446	FALSE	FALSE	FALSE	0.154941414066382
1	43154004	43104004	43204004	121	1	0.38965	132	0.0132023	0.462923	0.614602	0.685981	0.743344	0.796482	0.825331	0.850383	0.288708	-1.70183	0.000526097	0.267314	0.938368	0.167812	0.0341969	3.35484	181.704	1.10089	FALSE	FALSE	FALSE	0.155041099483436
1	43554004	43504004	43604004	147	4	0.40916	135	0.0113807	0.408924	0.531429	0.646276	0.718899	0.764152	0.8062	0.82854	0.32794	-1.87689	0.000593542	0.229722	0.93572	0.132345	0.00779516	4.77333	622.644	2.39873	FALSE	FALSE	FALSE	0.15532942576739
1	43654004	43604004	43704004	112	1	0.40538	82	0.010164	0.418825	0.621791	0.697255	0.758222	0.810052	0.837137	0.878208	0.282644	-1.74511	0.00049204	0.228103	0.960082	0.163446	0.0633099	5.67857	2528.64	2.93192	FALSE	FALSE	FALSE	0.155448468719442
1	43754004	43704004	43804004	139	5	0.37895	153	0.0154744	0.457706	0.575727	0.674172	0.744496	0.807843	0.832406	0.850572	0.293868	-1.67637	0.000589764	0.235995	0.917021	0.156333	0.0461213	7.71429	131644	15.2033	FALSE	FALSE	FALSE	0.155749562819767
1	43854004	43804004	43904004	232	3	0.38739	162	0.0139612	0.382288	0.6822	0.750334	0.802655	0.839477	0.868229	0.880934	0.256269	-1.60153	0.000726182	0.212951	0.914703	0.29505	0.0292871	6.4087	141325	637.688	FALSE	FALSE	FALSE	0.155753915501948
1	43954004	43904004	44004004	168	2	0.39899	115	0.0119422	0.321386	0.581615	0.668164	0.735828	0.788537	0.837752	0.873068	0.313378	-1.57608	0.00058272	0.228495	0.945961	0.179673	0.187427	7.01205	178825	403.969	FALSE	FALSE	FALSE	0.155853541955517
1	44054004	44004004	44104004	221	5	0.39295	204	0.0214576	0.404113	0.650639	0.72882	0.786287	0.826728	0.844903	0.862833	0.270811	-1.30386	0.000759771	0.244553	0.902754	0.203924	0.170316	8	199999	153.257	FALSE	FALSE	FALSE	0.155946447840363
1	44154004	44104004	44204004	335	1	0.40645	160	0.0134047	0.465784	0.671628	0.7413	0.794642	0.829516	0.877178	0.89644	0.246216	-1.32019	0.00109659	0.252196	0.934062	0.271285	0.217185	8	199999	192.153	FALSE	FALSE	FALSE	0.156431769706781
1	44254004	44204004	44304004	250	2	0.39334	173	0.0168553	0.4196	0.611945	0.733385	0.769273	0.80257	0.834781	0.86292	0.280789	-1.16001	0.000901578	0.23164	0.91688	0.20839	0.341027	7.35714	127863	56.0043	FALSE	FALSE	FALSE	0.156478759505844
1	44354004	44304004	44404004	194	3	0.38356	178	0.0183492	0.500383	0.655795	0.733053	0.781357	0.821445	0.845134	0.864448	0.256912	-0.878252	0.00077233	0.207282	0.898245	0.206011	0.327366	4.62887	3007.31	9.37258	FALSE	FALSE	FALSE	0.156983840310105
1	44554004	44504004	44604004	297	1	0.40843	226	0.0232937	0.589726	0.713567	0.764098	0.800181	0.827835	0.851465	0.851619	0.228787	-0.757989	0.0011552	0.176146	0.87984	0.237987	0.654827	3.74	187.548	5.93587	FALSE	FALSE	FALSE	0.157158095768574
1	44654004	44604004	44704004	303	5	0.39188	208	0.017664	0.639745	0.765701	0.804975	0.838729	0.86604	0.879906	0.901148	0.186251	-0.309636	0.00118416	0.17051	0.934641	0.313258	0.793076	6.78808	51407.4	191.176	FALSE	FALSE	FALSE	0.157239633221618
1	44754004	44704004	44804004	225	3	0.37347	234	0.0222502	0.636154	0.771768	0.806268	0.83648	0.860856	0.879355	0.892997	0.188017	-0.412693	0.000878647	0.157693	0.886756	0.309783	0.961412	6.82301	89618.5	207.774	FALSE	FALSE	FALSE	0.157435617813495
1	44854004	44804004	44904004	202	3	0.41043	160	0.0156299	0.457291	0.683655	0.756014	0.80873	0.841	0.861865	0.879807	0.244519	-1.1062	0.000717789	0.306743	0.90538	0.248359	0.366954	6.58	34558.8	30.6369	FALSE	FALSE	FALSE	0.157591105339115
1	44954004	44904004	45004004	247	2	0.40676	176	0.0142337	0.46998	0.645228	0.773567	0.829622	0.864819	0.891348	0.910627	0.230687	-1.06572	0.000839957	0.275955	0.930807	0.231367	0.318482	7.29921	69873.9	77.3757	FALSE	FALSE	FALSE	0.157991834121594
1	45054004	45004004	45104004	294	5	0.38009	183	0.0126428	0.299918	0.536139	0.677441	0.749732	0.796626	0.847848	0.870019	0.317468	-1.19121	0.00094224	0.247949	0.916225	0.16601	0.196712	6.48276	20479.8	23.9052	FALSE	FALSE	FALSE	0.158163778829207
1	45154004	45104004	45204004	358	1	0.40432	245	0.0192369	0.528256	0.657398	0.774498	0.815549	0.853447	0.885692	0.898547	0.226659	-0.849981	0.00125441	0.159357	0.918096	0.215865	0.488869	5.31638	1421.88	12.6231	FALSE	FALSE	FALSE	0.158241600459165
1	45254004	45204004	45304004	244	4	0.40196	175	0.0167801	0.508591	0.614073	0.706695	0.797789	0.834398	0.867852	0.881756	0.255549	-0.722954	0.000887911	0.211348	0.882334	0.192892	0.230482	5.24	1708.57	23.5156	FALSE	FALSE	FALSE	0.15827309917185
1	45354004	45304004	45404004	331	3	0.39067	207	0.0181459	0.58116	0.697557	0.763542	0.825746	0.855349	0.869196	0.891953	0.2165	-0.691561	0.0012954	0.219896	0.912398	0.239378	0.490182	5.26829	1385.47	7.85796	FALSE	FALSE	FALSE	0.158369235046085
1	45454004	45404004	45504004	345	3	0.39745	226	0.0193601	0.50088	0.659932	0.72521	0.789744	0.836615	0.871152	0.883401	0.247581	-0.75387	0.00133659	0.246877	0.881034	0.207872	0.426018	4.90751	409.27	8.19082	FALSE	FALSE	FALSE	0.158456205077306
1	45554004	45504004	45604004	328	2	0.40529	238	0.0189254	0.405414	0.707782	0.773361	0.830156	0.852892	0.873219	0.883619	0.23908	-0.478385	0.00126395	0.308927	0.902106	0.200559	0.750732	4.35583	854.193	16.2902	FALSE	FALSE	FALSE	0.158524798937858
1	45754004	45704004	45804004	310	5	0.38435	242	0.0219111	0.531993	0.646952	0.737293	0.774883	0.797317	0.817175	0.836256	0.265447	-0.323102	0.00113046	0.179675	0.801257	0.220471	3.66434	5.9359	61081.9	565.226	FALSE	FALSE	FALSE	0.158603275547469
1	45854004	45804004	45904004	206	6	0.37582	188	0.014441	0.253106	0.439796	0.546663	0.617437	0.66579	0.707395	0.737405	0.433201	-1.3642	0.000643497	0.218439	0.797165	0.133954	0.333602	7.00971	44431.9	153.07	FALSE	FALSE	FALSE	0.158620050189584
1	45954004	45904004	46004004	132	9	0.37242	129	0.0125786	0.240747	0.444422	0.560712	0.640934	0.706787	0.751579	0.79432	0.408643	-1.91642	0.000421835	0.169593	0.923783	0.116893	-0.00756818	5.87879	31837.5	7.15312	FALSE	FALSE	FALSE	0.158636399056615
1	46054004	46004004	46104004	123	4	0.39116	105	0.012323	0.354128	0.503533	0.627925	0.740973	0.792338	0.832762	0.84907	0.328467	-1.93823	0.000468509	0.212703	0.92962	0.142285	0.0583881	7.7377	35655.2	31.6872	FALSE	FALSE	FALSE	0.15868255692797
1	46154004	46104004	46204004	106	1	0.37509	111	0.0136466	0.321198	0.485957	0.594502	0.675987	0.748691	0.804654	0.830504	0.362644	-1.884	0.000409976	0.197778	0.92416	0.133897	-0.00569705	5.83333	962.27	4.07891	FALSE	FALSE	FALSE	0.158788202839337
1	46354004	46304004	46404004	139	5	0.35142	98	0.00923035	0.32464	0.451321	0.552836	0.637211	0.712096	0.763131	0.804576	0.393456	-2.02929	0.000460312	0.159726	0.948341	0.107905	0.434399	8.30882	126289	22.3894	FALSE	FALSE	FALSE	0.159011682212376
1	46454004	46404004	46504004	143	3	0.38219	141	0.00989576	0.34449	0.475703	0.576665	0.636458	0.724586	0.760061	0.799192	0.383264	-1.99264	0.000464928	0.162813	0.921358	0.123121	0.294275	7.125	55262.8	10.7867	FALSE	FALSE	FALSE	0.159048731010152
1	46554004	46504004	46604004	120	3	0.40094	152	0.0165618	0.354607	0.461273	0.551345	0.646915	0.739809	0.787779	0.818048	0.377175	-1.86179	0.000368858	0.173416	0.925002	0.108161	0.242382	7.35484	56467.4	3.7743	FALSE	FALSE	FALSE	0.159063348080109
1	46654004	46604004	46704004	162	2	0.40573	105	0.0091622	0.364162	0.481828	0.589111	0.691839	0.74439	0.762666	0.844935	0.360153	-1.8314	0.000499422	0.1877	0.968596	0.12943	0.194289	8.425	97833.3	13.0243	FALSE	FALSE	FALSE	0.159077809407001
1	46754004	46704004	46804004	149	6	0.37272	122	0.0115234	0.333895	0.460619	0.582143	0.681842	0.744306	0.783355	0.831312	0.368933	-1.86341	0.000474039	0.188058	0.950283	0.13069	0.281859	8.04054	141036	33.326	FALSE	FALSE	FALSE	0.159146307523611
1	46854004	46804004	46904004	147	3	0.38383	131	0.0126214	0.37217	0.488988	0.598065	0.69271	0.769749	0.840148	0.880462	0.336815	-1.91833	0.000472899	0.199125	0.920907	0.124746	0.185052	8.27027	191836	89.9388	FALSE	FALSE	FALSE	0.159302860358817
1	46954004	46904004	47004004	216	1	0.38255	127	0.0104822	0.335501	0.558194	0.645292	0.70816	0.76166	0.811952	0.838813	0.334347	-1.67462	0.000664424	0.213481	0.882199	0.163768	0.204864	7.14815	192580	328.686	FALSE	FALSE	FALSE	0.159356747867287
1	47054004	47004004	47104004	163	6	0.38427	120	0.0134275	0.373825	0.580428	0.662133	0.724718	0.773598	0.819477	0.859853	0.315138	-1.66152	0.00048044	0.202585	0.869737	0.184936	0.0653062	7.45679	199999	253.866	FALSE	FALSE	FALSE	0.159472663311101
1	47154004	47104004	47204004	161	5	0.36873	184	0.0166022	0.370646	0.508387	0.608884	0.691483	0.770846	0.814837	0.8316	0.343331	-1.73617	0.000537264	0.22228	0.879999	0.132557	0.124627	4.65854	22433.3	3.06787	FALSE	FALSE	FALSE	0.159666883801454
1	47254004	47204004	47304004	126	7	0.37608	148	0.0128781	0.380004	0.502115	0.608319	0.68088	0.729901	0.772554	0.795912	0.361474	-1.76464	0.0004792	0.227618	0.915928	0.131448	0.174321	7.03175	133507	229.674	FALSE	FALSE	FALSE	0.15977934527301
1	47354004	47304004	47404004	416	3	0.39472	176	0.0102352	0.572429	0.71572	0.803545	0.849341	0.865026	0.882014	0.893536	0.202627	-1.16937	0.00102868	0.210343	0.925349	0.436316	0.30034	5.05797	199999	8932.44	FALSE	FALSE	FALSE	0.159990172940724
1	47454004	47404004	47504004	615	6	0.38986	236	0.0126502	0.365583	0.611849	0.733447	0.786976	0.806596	0.822434	0.837122	0.290856	-0.617535	0.00173581	0.247424	0.777975	0.239053	1.01254	5	199999	11081.7	FALSE	FALSE	FALSE	0.16011952391042
1	47554004	47504004	47604004	416	6	0.36586	170	0.0125786	0.387163	0.592893	0.736872	0.785164	0.806553	0.822761	0.83714	0.290208	-0.21407	0.00143414	0.259202	0.817328	0.202822	0.91408	5.76077	199999	5235.49	FALSE	FALSE	FALSE	0.160335149295824
1	47654004	47604004	47704004	876	1	0.42145	280	0.0169223	0.500282	0.802243	0.854099	0.867343	0.88022	0.889614	0.90115	0.186436	0.415137	0.00318324	0.316831	0.90147	0.287809	1.33439	6.9977	199999	1619.44	FALSE	FALSE	FALSE	0.160375368544457
1	47754004	47704004	47804004	420	1	0.41087	243	0.0174603	0.566632	0.749887	0.794542	0.81503	0.829192	0.838384	0.850984	0.222193	0.844746	0.00180229	0.338152	0.831854	0.343592	1.31141	7	195853	857.644	FALSE	FALSE	FALSE	0.161056608297126
1	47854004	47804004	47904004	231	6	0.36604	151	0.0106728	0.468487	0.684698	0.725496	0.759557	0.789556	0.808952	0.82468	0.276939	-0.131838	0.000918546	0.356674	0.858449	0.218653	0.487596	7.82456	187744	206.866	FALSE	FALSE	FALSE	0.161070174682144
1	47954004	47904004	48004004	225	6	0.38952	165	0.0139203	0.679504	0.731756	0.783399	0.823369	0.861228	0.890295	0.907013	0.189062	-0.844904	0.000991067	0.406889	0.929809	0.292532	0.870408	6.6036	41266.1	15.4735	FALSE	FALSE	FALSE	0.161247542319231
1	48054004	48004004	48104004	234	1	0.40398	205	0.0206687	0.605352	0.698222	0.776006	0.822774	0.853837	0.87523	0.891038	0.211077	-0.780157	0.000972851	0.361535	0.92598	0.249645	0.951538	5.08547	794.251	8.4194	FALSE	FALSE	FALSE	0.161562070393235
1	48154004	48104004	48204004	223	2	0.39709	147	0.0122402	0.667396	0.744774	0.807368	0.843337	0.874726	0.900242	0.920686	0.177353	-0.493153	0.000942532	0.404765	0.958084	0.318451	0.855209	6.87719	25477.5	42.0817	FALSE	FALSE	FALSE	0.161685693039302
1	48254004	48204004	48304004	236	5	0.37927	206	0.0188413	0.554751	0.717621	0.779907	0.811412	0.841941	0.866803	0.882359	0.220744	-0.792872	0.00104595	0.291292	0.907626	0.23315	1.19731	7.10256	153660	228.58	FALSE	FALSE	FALSE	0.161711069270533
1	48354004	48304004	48404004	350	4	0.37538	232	0.0259479	0.36519	0.547726	0.616295	0.683792	0.728344	0.761109	0.783271	0.359182	-1.02802	0.00102202	0.169973	0.829214	0.206376	0.552636	6.23429	199999	3030.84	FALSE	FALSE	FALSE	0.161738701765373
1	48454004	48404004	48504004	377	3	0.38861	164	0.00740704	0.591989	0.690013	0.772133	0.809975	0.843804	0.863084	0.881102	0.221128	-1.24557	0.000951541	0.142478	0.936841	0.409063	0.583792	5.93651	190385	4556.49	FALSE	FALSE	FALSE	0.161758355707799
1	48554004	48504004	48604004	317	3	0.37864	189	0.016011	0.320981	0.49791	0.615657	0.70844	0.751783	0.792381	0.819912	0.356134	-0.622581	0.00103537	0.173421	0.81657	0.169516	0.67456	6.49682	132768	780.385	FALSE	FALSE	FALSE	0.161920748149175
1	48654004	48604004	48704004	147	2	0.38831	180	0.0227185	0.546092	0.676815	0.733119	0.77838	0.810023	0.834815	0.85702	0.251962	-1.00691	0.000603296	0.302137	0.853036	0.263552	0.730146	6.875	93049.3	155.3	FALSE	FALSE	FALSE	0.161937505225012
1	48754004	48704004	48804004	189	2	0.39565	169	0.0145752	0.571512	0.698102	0.766243	0.806181	0.842654	0.8786	0.89738	0.219904	-1.003	0.000892822	0.362465	0.917117	0.223512	0.268721	4.72727	648.768	5.6918	FALSE	FALSE	FALSE	0.161953143809367
1	48854004	48804004	48904004	193	2	0.39446	176	0.0210187	0.588346	0.665994	0.727325	0.778222	0.819799	0.85968	0.883046	0.239655	-0.973034	0.000847166	0.304297	0.902645	0.233896	0.413869	5.68478	2872.34	8.13719	FALSE	FALSE	FALSE	0.16195593429817
1	48954004	48904004	49004004	202	6	0.40222	173	0.0154119	0.376564	0.506805	0.60567	0.672065	0.735877	0.777285	0.811103	0.359233	-1.29595	0.000755584	0.196575	0.849275	0.151677	0.109803	4.66019	2648.67	5.64363	FALSE	FALSE	FALSE	0.161973464421749
1	49054004	49004004	49104004	241	7	0.39625	159	0.0131006	0.327668	0.511845	0.617326	0.685788	0.731542	0.763838	0.793713	0.366897	-1.46674	0.000920525	0.167438	0.857198	0.165722	0.206737	8.16529	93321.4	20.3265	FALSE	FALSE	FALSE	0.162118136660104
1	49154004	49104004	49204004	293	3	0.38676	175	0.0122781	0.321578	0.475317	0.607992	0.696999	0.770499	0.81944	0.854309	0.350552	-1.38181	0.000864035	0.163867	0.898028	0.158694	0.250641	7.5274	148354	160.527	FALSE	FALSE	FALSE	0.162295415199607
1	49254004	49204004	49304004	251	6	0.39172	193	0.0144829	0.532861	0.611416	0.675229	0.735065	0.786723	0.819536	0.846315	0.284694	-1.21906	0.000984219	0.298648	0.854091	0.182484	0.673709	7.71774	158346	121.605	FALSE	FALSE	TRUE	0.162424428662731
1	49354004	49304004	49404004	236	3	0.39225	188	0.0168159	0.670379	0.741892	0.791044	0.835459	0.866383	0.892496	0.908599	0.184821	-0.855687	0.00100263	0.37394	0.937934	0.275847	0.710912	7.70339	81721.4	14.1358	FALSE	FALSE	FALSE	0.16249310700543
1	49454004	49404004	49504004	105	4	0.37857	130	0.0137766	0.410066	0.56823	0.67391	0.731612	0.759735	0.78443	0.802806	0.324173	-1.87338	0.000410352	0.240232	0.834709	0.157401	0.166191	5.27273	1938.81	12.3791	FALSE	FALSE	FALSE	0.162539912128761
1	49554004	49504004	49604004	114	1	0.41138	105	0.0117511	0.421691	0.576849	0.68389	0.767586	0.813925	0.847123	0.877895	0.287292	-1.72078	0.000469745	0.246704	0.946092	0.154474	0.17287	5.25	746.585	4.65097	FALSE	FALSE	FALSE	0.162555415405838
1	49654004	49604004	49704004	194	1	0.39774	141	0.0127731	0.347362	0.512804	0.648247	0.763891	0.814363	0.854902	0.879733	0.311243	-1.77447	0.000655331	0.222572	0.947338	0.164069	0.0675941	7.97895	45622.1	16.7285	FALSE	FALSE	FALSE	0.162612128311051
1	49954004	49904004	50004004	132	3	0.40104	130	0.0144845	0.348692	0.512514	0.632842	0.741206	0.787449	0.821458	0.849066	0.329539	-1.59084	0.000454081	0.225663	0.931905	0.150667	0.169214	4.55385	1191.43	5.59383	FALSE	FALSE	FALSE	0.162682608042818
1	50054004	50004004	50104004	85	1	0.41985	104	0.0158343	0.264716	0.43999	0.602756	0.7417	0.816392	0.844039	0.864784	0.346518	-1.74703	0.000281527	0.185647	0.900844	0.150072	0.0338453	5.43478	3960.61	12.9639	FALSE	FALSE	FALSE	0.162946372631414
1	50354004	50304004	50404004	147	2	0.40718	149	0.0158302	0.363156	0.50986	0.634343	0.738432	0.795423	0.834559	0.863873	0.322908	-1.56155	0.00047609	0.22829	0.928358	0.148593	0.24346	4.64384	1134.86	10.4451	FALSE	FALSE	FALSE	0.163179875505557
1	50454004	50404004	50504004	188	3	0.4085	98	0.0114412	0.435791	0.562545	0.680289	0.77156	0.822149	0.864766	0.896135	0.280966	-1.7644	0.000678685	0.246356	0.966807	0.167815	0.11166	7.56842	16647.2	6.51643	FALSE	FALSE	FALSE	0.163245318874459
1	50554004	50504004	50604004	198	4	0.40877	174	0.0239502	0.397878	0.521613	0.633959	0.735979	0.791512	0.821791	0.838396	0.322696	-1.60952	0.00074035	0.242622	0.897541	0.149508	1.13674	6.0625	27776.3	17.0469	FALSE	FALSE	FALSE	0.163455404334409
1	50754004	50704004	50804004	148	4	0.40067	126	0.0137685	0.300317	0.47034	0.632105	0.759606	0.795807	0.825843	0.853641	0.337477	-1.7523	0.000487876	0.210429	0.915302	0.159849	0.131189	7.76056	74180.4	17.6644	FALSE	FALSE	FALSE	0.163495755836082
1	50854004	50804004	50904004	126	1	0.39953	101	0.0122791	0.380566	0.553413	0.683699	0.795938	0.833145	0.870216	0.894762	0.284037	-1.68136	0.000448057	0.242684	0.952699	0.175726	0.117452	8.01538	96528.6	10.6601	FALSE	FALSE	FALSE	0.163496909538084
1	50954004	50904004	51004004	147	2	0.40896	152	0.0170282	0.376241	0.533721	0.662754	0.768185	0.807658	0.841085	0.861421	0.306991	-1.57452	0.000491694	0.222013	0.890484	0.152603	0.255548	6.36986	20729.9	5.89455	FALSE	FALSE	FALSE	0.163507657091333
1	51054004	51004004	51104004	174	1	0.41236	127	0.0122172	0.319575	0.487719	0.623412	0.741189	0.801572	0.842255	0.866916	0.331052	-1.79274	0.000592794	0.213823	0.946823	0.157164	0.215663	5.87356	11342.6	9.27849	FALSE	FALSE	FALSE	0.163551495455707
1	51354004	51304004	51404004	141	1	0.40227	124	0.0138722	0.3074	0.486053	0.64956	0.732743	0.798717	0.848785	0.870308	0.32949	-1.68628	0.000432443	0.225855	0.929036	0.150892	0.257063	5.97183	3392.33	10.1398	FALSE	FALSE	FALSE	0.163579972735762
1	51454004	51404004	51504004	131	1	0.4097	124	0.0136348	0.259477	0.466265	0.591783	0.706586	0.771744	0.83636	0.858848	0.35842	-1.71566	0.000402254	0.190638	0.928402	0.137044	0.335279	8.1875	92783.5	10.8375	FALSE	FALSE	FALSE	0.163838557827286
1	51654004	51604004	51704004	187	2	0.39862	192	0.0191034	0.309677	0.471829	0.600948	0.712617	0.766048	0.813417	0.846527	0.354134	-1.75803	0.000611705	0.207326	0.906486	0.137709	0.199127	4.62637	2167.1	6.72762	FALSE	FALSE	FALSE	0.163873038000659
1	51754004	51704004	51804004	166	1	0.40536	99	0.0104569	0.325395	0.494683	0.639394	0.762604	0.811252	0.857643	0.886151	0.317554	-1.68454	0.000522935	0.213667	0.965542	0.161664	0.040714	8.46988	100275	17.5481	FALSE	FALSE	FALSE	0.164267919117913
1	51854004	51804004	51904004	124	2	0.39366	119	0.0141509	0.378865	0.530319	0.669162	0.766847	0.823347	0.855122	0.873723	0.300374	-1.62689	0.000431436	0.226796	0.935885	0.150327	0.180173	5.25397	36174.2	5.70911	FALSE	FALSE	FALSE	0.164288159157662
1	52054004	52004004	52104004	53	2	0.3774	152	0.0571971	0.187256	0.328462	0.457287	0.523585	0.577813	0.625096	0.648756	0.521678	-1.35236	0.000159904	0.14617	0.683284	0.069999	0.627687	0.923077	40.5571	3.11582	FALSE	FALSE	FALSE	0.164432579392516
1	52254004	52204004	52304004	157	2	0.3746	260	0.0511958	0.248294	0.393984	0.489664	0.579991	0.634847	0.660149	0.683487	0.472798	-1.59247	0.000487622	0.159933	0.644068	0.0896547	0.0766521	3.03947	262.065	6.60161	FALSE	FALSE	FALSE	0.164548610866514
1	52354004	52304004	52404004	114	7	0.38012	104	0.0132958	0.39745	0.561977	0.676177	0.777419	0.832897	0.886545	0.903888	0.280521	-1.62029	0.000390389	0.235137	0.928593	0.148993	0.209129	6.76271	49556.7	13.5312	FALSE	FALSE	FALSE	0.16463978472828
1	52454004	52404004	52504004	158	6	0.41879	134	0.0134941	0.326399	0.489842	0.617824	0.73242	0.784185	0.844176	0.872412	0.333249	-1.79578	0.000551042	0.218981	0.954301	0.148928	0.336197	5.975	5111.57	13.4534	FALSE	FALSE	FALSE	0.164658791840974
1	52554004	52504004	52604004	100	3	0.40239	119	0.0166038	0.382971	0.56047	0.662054	0.750504	0.79998	0.844571	0.866208	0.304749	-1.72586	0.000374125	0.232457	0.922811	0.140064	0.233889	4.02083	291.449	3.46319	FALSE	FALSE	FALSE	0.164808564348167
1	52654004	52604004	52704004	216	2	0.40955	182	0.0160436	0.379377	0.520131	0.624162	0.717264	0.784497	0.825051	0.852737	0.328112	-1.61239	0.000749142	0.226563	0.886319	0.135269	0.348292	5.60748	4129.18	14.8274	FALSE	FALSE	FALSE	0.164863679012123
1	52754004	52704004	52804004	125	4	0.37489	154	0.0179119	0.425761	0.595933	0.679428	0.746404	0.796128	0.823516	0.845026	0.298258	-1.72746	0.000472686	0.249523	0.905731	0.146687	0.10994	3.61905	3870.04	8.14267	FALSE	FALSE	FALSE	0.164878708874951
1	52854004	52804004	52904004	139	8	0.38652	88	0.00977331	0.272371	0.45576	0.630872	0.764232	0.830007	0.878703	0.901116	0.323848	-1.80065	0.000434278	0.193276	0.967445	0.169104	0.0528721	7.74627	33809.9	28.3093	FALSE	FALSE	FALSE	0.165036989622479
1	52954004	52904004	53004004	191	2	0.40987	144	0.0143238	0.372775	0.522018	0.645772	0.743767	0.789848	0.837222	0.864068	0.31779	-1.59778	0.000632709	0.2247	0.933371	0.139799	0.187017	8.60825	155340	17.9196	FALSE	FALSE	FALSE	0.165137733700039
1	53054004	53004004	53104004	73	1	0.4127	103	0.0186956	0.325051	0.518785	0.608049	0.686849	0.733912	0.773871	0.806467	0.36386	-1.71235	0.000209072	0.196303	0.853388	0.108074	0.159391	5.97368	8063	5.58673	FALSE	FALSE	FALSE	0.165377768736457
1	53154004	53104004	53204004	131	4	0.39981	140	0.0127226	0.297214	0.47202	0.586515	0.683747	0.749276	0.802629	0.831692	0.36813	-1.68525	0.000405547	0.203037	0.918676	0.132909	0.103235	4.38462	1761.16	3.07207	FALSE	FALSE	FALSE	0.165436435497245
1	53254004	53204004	53304004	192	2	0.39085	171	0.0142492	0.379431	0.518736	0.64545	0.74441	0.807554	0.843643	0.869101	0.313096	-1.60488	0.000653496	0.234806	0.934409	0.155433	0.0390003	6.18947	1846.77	6.35975	FALSE	FALSE	FALSE	0.165490744920573
1	53554004	53504004	53604004	90	2	0.4256	142	0.021174	0.314693	0.479041	0.622517	0.751024	0.793745	0.822406	0.84823	0.338335	-1.79747	0.000355077	0.192222	0.91617	0.141712	0.138127	4.55814	667.909	5.37035	FALSE	FALSE	FALSE	0.165570655355919
1	53754004	53704004	53804004	114	1	0.40694	89	0.0119166	0.334246	0.50461	0.638224	0.75647	0.827142	0.891271	0.907281	0.305822	-1.78122	0.000384498	0.210331	0.950105	0.16424	0.134843	7.66667	102714	21.9283	FALSE	FALSE	FALSE	0.165614599192573
1	53854004	53804004	53904004	125	4	0.37576	173	0.028478	0.498995	0.606898	0.692115	0.74945	0.793247	0.827233	0.849272	0.283255	-1.74989	0.00048235	0.255627	0.898075	0.138293	0.130801	4.08065	5513.32	8.0946	FALSE	FALSE	FALSE	0.165624267202455
1	53954004	53904004	54004004	148	5	0.39275	191	0.0226925	0.325854	0.491125	0.606993	0.683122	0.747209	0.795332	0.819648	0.361531	-1.76896	0.000496527	0.212954	0.892388	0.128854	0.0156094	3.90667	684.796	5.80037	FALSE	FALSE	FALSE	0.165654235910001
1	54054004	54004004	54104004	203	1	0.41204	183	0.0177216	0.315316	0.460414	0.592662	0.709518	0.77392	0.827513	0.849436	0.353032	-1.7229	0.000655413	0.205944	0.937228	0.135519	0.169311	5.60606	1737.13	4.69906	FALSE	FALSE	FALSE	0.165750767638224
1	54154004	54104004	54204004	129	6	0.3758	123	0.0172103	0.363107	0.525408	0.627631	0.7103	0.779888	0.825033	0.846291	0.331763	-1.63466	0.000486689	0.204648	0.910847	0.139819	0.168403	5.72727	24400.9	5.24299	FALSE	FALSE	FALSE	0.165856282275943
1	54254004	54204004	54304004	102	2	0.41157	120	0.0164015	0.294712	0.461198	0.595981	0.69178	0.773624	0.80401	0.828708	0.364284	-1.52572	0.000311913	0.199951	0.932897	0.133681	0.165938	4.96154	906.452	1.84573	FALSE	FALSE	TRUE	0.166124098358553
1	54354004	54304004	54404004	119	3	0.38903	83	0.0147984	0.335076	0.477274	0.611489	0.727989	0.818502	0.84833	0.868794	0.330364	-1.81796	0.000426567	0.195879	0.947343	0.14148	0.259649	7.22414	4355.86	10.1088	FALSE	FALSE	FALSE	0.166394111858934
1	54454004	54404004	54504004	107	5	0.37233	211	0.0319755	0.296524	0.43801	0.536216	0.614591	0.670839	0.707466	0.737326	0.428433	-1.74477	0.00040017	0.170037	0.759561	0.094919	0.106826	2.05455	142.262	0.570317	FALSE	FALSE	FALSE	0.166413668793432
1	54554004	54504004	54604004	118	2	0.40043	129	0.0144441	0.381806	0.555714	0.710211	0.776474	0.826751	0.873607	0.886822	0.284088	-1.94252	0.00047044	0.211017	0.920867	0.167362	0.207255	6.64912	7284.75	6.07557	FALSE	FALSE	FALSE	0.166461834806772
1	54654004	54604004	54704004	151	3	0.39907	147	0.0153692	0.422737	0.664702	0.773125	0.827172	0.8636	0.892358	0.902532	0.236253	-1.80202	0.000615185	0.252651	0.917535	0.185369	0.15242	7.63158	82479	10.2663	FALSE	FALSE	FALSE	0.166642880690692
1	54754004	54704004	54804004	139	5	0.39645	149	0.0150219	0.393766	0.578696	0.73399	0.780223	0.80966	0.838532	0.857866	0.286753	-1.89072	0.000556227	0.228605	0.892999	0.180508	0.169476	7.47826	103942	32.492	FALSE	FALSE	TRUE	0.166708128682203
1	54854004	54804004	54904004	104	6	0.38091	104	0.0106434	0.463442	0.622923	0.728733	0.798542	0.841509	0.883741	0.894132	0.252426	-1.81856	0.000384346	0.243244	0.921415	0.173925	0.0348495	7.09615	104985	60.525	FALSE	FALSE	TRUE	0.166988681048103
1	54954004	54904004	55004004	159	2	0.42671	136	0.0118666	0.447572	0.623598	0.732334	0.803021	0.834762	0.857353	0.882483	0.259839	-1.86723	0.000662694	0.275762	0.947351	0.20181	0.134656	7.67089	144890	39.0136	FALSE	FALSE	FALSE	0.167255796946256
1	55054004	55004004	55104004	102	5	0.38949	96	0.0117154	0.468365	0.635601	0.767276	0.808031	0.842464	0.860798	0.872208	0.249322	-1.81658	0.000498566	0.276147	0.933298	0.16289	0.188998	7.84615	102217	10.2019	FALSE	FALSE	FALSE	0.167718942810969
1	55154004	55104004	55204004	166	1	0.4231	129	0.0135258	0.403727	0.55719	0.671602	0.763671	0.816401	0.853609	0.86966	0.294877	-1.86967	0.000633113	0.182576	0.925306	0.154998	0.432885	7.71429	81643.7	32.749	FALSE	FALSE	FALSE	0.167767478300021
1	55454004	55404004	55504004	78	7	0.38422	104	0.0133043	0.378089	0.519648	0.630924	0.722695	0.755828	0.783479	0.804668	0.343524	-1.97506	0.00032293	0.229582	0.902902	0.154911	0.217062	7.63415	79812.5	9.51226	FALSE	FALSE	FALSE	0.167899530697556
1	55554004	55504004	55604004	129	2	0.40025	154	0.0128224	0.466747	0.620439	0.727354	0.812996	0.841627	0.8591	0.869062	0.257525	-1.79642	0.000471436	0.230419	0.917713	0.172373	0.117064	7.1746	90698.5	35.7881	FALSE	FALSE	FALSE	0.168075269897249
1	55654004	55604004	55704004	122	3	0.38717	136	0.0129395	0.406431	0.626722	0.715325	0.769462	0.820747	0.845932	0.860978	0.2792	-1.86912	0.000420324	0.194156	0.906063	0.155846	0.247778	7.31148	135440	50.8205	FALSE	FALSE	FALSE	0.168106919600481
1	55754004	55704004	55804004	124	1	0.40687	117	0.0121729	0.440221	0.58651	0.695106	0.771116	0.805859	0.83348	0.853732	0.287711	-1.99685	0.000499707	0.218387	0.901734	0.156491	0.381059	7.25806	144718	128.924	FALSE	FALSE	FALSE	0.168266748951818
1	55954004	55904004	56004004	161	2	0.40713	108	0.00878941	0.463022	0.628654	0.773493	0.821182	0.865146	0.891237	0.902498	0.236396	-1.84787	0.000577371	0.23327	0.968077	0.183639	0.364993	7.925	199999	150.66	FALSE	FALSE	FALSE	0.168363208865915
1	56054004	56004004	56104004	177	3	0.40516	122	0.0117969	0.442517	0.623131	0.73589	0.802914	0.857675	0.887027	0.892799	0.25115	-1.92477	0.000696701	0.228972	0.943857	0.164636	0.269998	8	199999	96.466	FALSE	FALSE	FALSE	0.16842504605253
1	56154004	56104004	56204004	124	1	0.41572	85	0.00770947	0.491187	0.637139	0.764114	0.823649	0.864744	0.894557	0.909986	0.230661	-1.78759	0.000467836	0.236039	0.975341	0.177711	0.063394	8.09524	155746	22.329	FALSE	FALSE	FALSE	0.168436015637405
1	56254004	56204004	56304004	137	2	0.40276	95	0.00863058	0.521345	0.685581	0.75465	0.821306	0.869211	0.899828	0.91	0.219726	-1.81265	0.000549318	0.244682	0.947598	0.175811	0.0127712	7.57353	64089.7	15.3167	FALSE	FALSE	FALSE	0.16848194877183
1	56354004	56304004	56404004	139	5	0.39551	169	0.0198634	0.409209	0.550627	0.648672	0.725761	0.796258	0.823894	0.84542	0.314308	-1.95572	0.000559029	0.195359	0.888752	0.13394	0.0873918	3.95522	3905.83	4.59402	FALSE	FALSE	FALSE	0.168581888435226
1	56454004	56404004	56504004	106	3	0.39478	103	0.0125786	0.354816	0.560321	0.64834	0.72689	0.785098	0.823502	0.855386	0.320807	-1.97724	0.00042311	0.173748	0.923473	0.141678	0.0437506	3.77358	726.066	3.55508	FALSE	FALSE	FALSE	0.168630497231147
1	56554004	56504004	56604004	103	6	0.39368	89	0.00879282	0.386864	0.606904	0.69189	0.761051	0.826277	0.862288	0.874524	0.284315	-2.15584	0.000475739	0.1668	0.9349	0.154916	0.0990248	7.43137	22520.7	27.3909	FALSE	FALSE	FALSE	0.168686510998208
1	56654004	56604004	56704004	85	2	0.40345	139	0.0240474	0.475897	0.628499	0.713059	0.750548	0.776805	0.802227	0.825197	0.289681	-1.86982	0.000415558	0.231285	0.874682	0.18084	0.198094	5.27907	25414.9	4.68788	FALSE	FALSE	FALSE	0.168836061738563
1	56754004	56704004	56804004	123	2	0.38224	133	0.0213223	0.472772	0.616474	0.699805	0.733039	0.762351	0.791624	0.818037	0.300842	-1.75777	0.00051292	0.207616	0.793962	0.138767	0.281974	4.67213	2748.24	25.7841	FALSE	FALSE	FALSE	0.168858416736728
1	56854004	56804004	56904004	113	9	0.38955	145	0.0128569	0.416695	0.596042	0.670967	0.724258	0.749605	0.770619	0.790306	0.32593	-1.952	0.000436826	0.205483	0.864307	0.138848	-0.016063	7.55172	139398	40.2873	FALSE	FALSE	FALSE	0.169177641494105
1	56954004	56904004	57004004	168	3	0.40782	160	0.0181566	0.416073	0.577916	0.685771	0.781484	0.842391	0.861001	0.872673	0.280384	-1.98485	0.000637948	0.188796	0.89912	0.154303	0.0520033	7.04762	199999	290.062	FALSE	FALSE	FALSE	0.169356328042432
1	57154004	57104004	57204004	124	5	0.37925	124	0.0122743	0.474157	0.607488	0.711474	0.789012	0.827504	0.856592	0.869904	0.266267	-1.98866	0.000512366	0.222203	0.892314	0.156272	0.0480594	7.86667	118351	17.934	FALSE	FALSE	FALSE	0.16938714432667
1	57254004	57204004	57304004	149	4	0.38918	223	0.0216538	0.360011	0.535083	0.637547	0.701023	0.735543	0.759676	0.778259	0.356122	-1.93761	0.000546104	0.192457	0.787636	0.112394	0.133555	4.67105	2638.29	11.1304	FALSE	FALSE	FALSE	0.169645041066474
1	57354004	57304004	57404004	169	3	0.38698	110	0.00911764	0.298905	0.502943	0.657741	0.728794	0.774088	0.811326	0.831708	0.342071	-1.82655	0.000555224	0.174068	0.938847	0.137378	0.553566	7.33735	8637.72	3.893	FALSE	FALSE	FALSE	0.169796199150234
1	57454004	57404004	57504004	137	2	0.38645	126	0.0119359	0.385651	0.583181	0.716188	0.787447	0.831927	0.860462	0.878541	0.279515	-1.81113	0.000521297	0.186259	0.930526	0.158776	0.497667	6.13043	30144.3	3.36016	FALSE	FALSE	FALSE	0.169819376837504
1	57554004	57504004	57604004	169	3	0.38761	202	0.0168955	0.314013	0.510082	0.637706	0.711009	0.769647	0.804809	0.83334	0.345628	-1.74105	0.000556378	0.180005	0.862015	0.13059	0.349145	4.36047	386.477	4.36908	FALSE	FALSE	FALSE	0.169909902822654
1	57654004	57604004	57704004	183	3	0.38961	134	0.0107228	0.366357	0.537669	0.673009	0.768816	0.812607	0.846265	0.878557	0.302389	-1.76354	0.0006618	0.208612	0.948287	0.157755	0.325172	3.85714	159.199	3.36117	FALSE	FALSE	FALSE	0.169955312086287
1	57754004	57704004	57804004	154	5	0.39393	130	0.0104958	0.479506	0.607514	0.70961	0.77591	0.810036	0.849712	0.865476	0.271748	-1.72905	0.000563498	0.226599	0.937339	0.165411	0.516133	6.76623	2589.45	2.90626	FALSE	FALSE	FALSE	0.169966225651301
1	57854004	57804004	57904004	119	1	0.39364	113	0.0141113	0.471708	0.644484	0.738845	0.791206	0.82702	0.856809	0.880138	0.255684	-1.83854	0.000512341	0.222403	0.953828	0.175785	0.308379	4.98305	1483.78	5.13697	FALSE	FALSE	FALSE	0.169976704127641
1	57954004	57904004	58004004	192	1	0.41988	173	0.0171646	0.458055	0.625767	0.722071	0.776938	0.822503	0.844416	0.873984	0.268038	-1.60014	0.00072115	0.210965	0.920037	0.154438	0.406747	4.31915	340.745	4.1609	FALSE	FALSE	FALSE	0.170057095659935
1	58054004	58004004	58104004	111	3	0.38333	108	0.011842	0.485439	0.657158	0.780203	0.825359	0.854592	0.880974	0.894083	0.231742	-1.73444	0.000497053	0.23329	0.943522	0.185948	0.187347	4.98246	562.952	3.95429	FALSE	FALSE	FALSE	0.170067708481089
1	58154004	58104004	58204004	173	4	0.39374	151	0.016723	0.441079	0.65007	0.747559	0.798401	0.836476	0.870914	0.883828	0.253096	-1.6152	0.000693225	0.202994	0.915887	0.168327	0.253859	4.13793	422.171	2.51245	FALSE	FALSE	TRUE	0.17013929990048
1	58254004	58204004	58304004	125	3	0.38494	181	0.024805	0.384871	0.616416	0.699882	0.752738	0.793622	0.814044	0.848701	0.298532	-1.49893	0.000510026	0.189829	0.856248	0.153141	0.489908	3.8125	317.071	1.13311	FALSE	FALSE	FALSE	0.170142087408824
1	58354004	58304004	58404004	139	3	0.39642	140	0.0172843	0.354106	0.561078	0.689604	0.754064	0.813918	0.848813	0.863244	0.302168	-1.64658	0.000515002	0.160373	0.872196	0.133132	0.481859	5.01493	1490.09	6.00695	FALSE	FALSE	FALSE	0.17046527490794
1	58454004	58404004	58504004	103	10	0.37861	109	0.0130671	0.392878	0.629174	0.746784	0.795733	0.833798	0.863409	0.886341	0.264555	-1.79071	0.00043557	0.188488	0.925845	0.164588	0.600178	2.77778	151.067	2.94215	FALSE	FALSE	FALSE	0.170527805441076
1	58554004	58504004	58604004	165	3	0.38058	202	0.0184486	0.418252	0.593679	0.67039	0.746457	0.782365	0.812564	0.8318	0.306356	-1.57645	0.000608723	0.189032	0.882129	0.135188	0.52131	4.3375	523.983	2.92639	FALSE	FALSE	FALSE	0.170599065489919
1	58654004	58604004	58704004	136	1	0.39207	200	0.0237236	0.441454	0.612974	0.69547	0.73507	0.767419	0.797895	0.823248	0.303781	-1.81922	0.000548188	0.203177	0.883322	0.137247	0.49661	3.33824	362.831	1.82376	FALSE	FALSE	FALSE	0.170759742779731
1	58754004	58704004	58804004	151	1	0.38493	124	0.0128702	0.358281	0.508464	0.6273	0.718272	0.77652	0.834308	0.859312	0.331078	-1.91424	0.000562212	0.222803	0.925439	0.149766	0.559399	6.24	3971.94	3.47911	FALSE	FALSE	FALSE	0.170807043323206
1	58854004	58804004	58904004	127	7	0.37896	143	0.0159956	0.386763	0.594691	0.656194	0.704831	0.752376	0.789622	0.811809	0.329102	-1.72069	0.000537123	0.238535	0.900699	0.14569	0.3971	3.15625	250.932	1.03835	FALSE	FALSE	FALSE	0.170852986286591
1	58954004	58904004	59004004	111	7	0.37979	99	0.0110488	0.268905	0.445428	0.594245	0.68708	0.751463	0.798602	0.841888	0.373199	-1.81525	0.000462508	0.195402	0.878681	0.12012	0.229755	5.10526	882.54	1.90212	FALSE	FALSE	FALSE	0.170968741284943
1	59054004	59004004	59104004	130	3	0.37592	135	0.015046	0.340849	0.524085	0.623	0.706737	0.7621	0.808168	0.851336	0.340532	-1.88902	0.000487328	0.198702	0.887257	0.122873	0.0269301	4.49206	386.9	2.84583	FALSE	FALSE	FALSE	0.171001335818892
1	59154004	59104004	59204004	42	1	0.38431	118	0.0351902	0.293185	0.445322	0.580095	0.663702	0.703294	0.736597	0.760323	0.402497	-1.92027	0.00017904	0.169227	0.851059	0.118551	-0.0645208	2.73913	526.774	5.33274	FALSE	FALSE	FALSE	0.171013235689204
1	59254004	59204004	59304004	127	3	0.3934	127	0.0144109	0.2842	0.46558	0.635446	0.719276	0.791952	0.820897	0.845885	0.348109	-1.94332	0.000494067	0.1851	0.919151	0.145576	0.0916632	4.32258	665.733	8.74005	FALSE	FALSE	FALSE	0.17109274455939
1	59354004	59304004	59404004	145	6	0.39382	137	0.0161787	0.418289	0.574877	0.677442	0.737275	0.792607	0.824026	0.855346	0.302877	-1.87606	0.000594085	0.225089	0.904142	0.143347	0.0698718	5.33784	1190.3	1.92209	FALSE	FALSE	FALSE	0.171176399386574
1	59454004	59404004	59504004	127	7	0.38227	144	0.0128757	0.306544	0.478356	0.630532	0.696132	0.749102	0.782936	0.815627	0.362967	-1.94793	0.000530884	0.235412	0.903956	0.141197	-0.00409822	5.45902	1606.23	8.75184	FALSE	FALSE	FALSE	0.171230453288042
1	59554004	59504004	59604004	132	3	0.38129	159	0.0160091	0.307483	0.545179	0.641964	0.717158	0.770919	0.808971	0.838486	0.338549	-1.98226	0.000486448	0.204062	0.881707	0.121051	0.122519	5.16176	1622.22	2.8829	FALSE	FALSE	FALSE	0.171253022051484
1	59654004	59604004	59704004	117	7	0.38151	175	0.0170403	0.242247	0.425587	0.551093	0.635241	0.701362	0.718352	0.762492	0.423375	-1.96445	0.000460342	0.207401	0.857003	0.114214	0.091078	3.64407	482.335	3.64219	FALSE	FALSE	FALSE	0.171275010040578
1	59754004	59704004	59804004	57	1	0.4006	97	0.013682	0.440936	0.53938	0.627016	0.704461	0.739976	0.769925	0.797905	0.340057	-1.68306	0.000220086	0.22629	0.842924	0.132637	0.154354	4.17857	596.145	4.0393	FALSE	FALSE	FALSE	0.171360534491354
1	59854004	59804004	59904004	77	2	0.39454	85	0.0129053	0.341532	0.519187	0.679546	0.740286	0.795753	0.825297	0.857504	0.320128	-2.10116	0.000365266	0.168033	0.936888	0.168164	-0.0113284	5.10256	2090.93	6.29214	FALSE	FALSE	FALSE	0.171582334238627
1	59954004	59904004	60004004	80	4	0.36934	141	0.0124214	0.231899	0.415851	0.525003	0.613938	0.671771	0.721121	0.74328	0.439591	-1.98327	0.000293815	0.160425	0.8322	0.0953741	0.0908246	2.025	115.332	0.811262	FALSE	FALSE	FALSE	0.171688641068933
1	60054004	60004004	60104004	93	6	0.36673	104	0.0102117	0.299013	0.508456	0.586743	0.644357	0.685868	0.712834	0.735057	0.403953	-2.08728	0.00037336	0.164237	0.857118	0.13843	0.136466	6.97872	47272.5	9.62033	FALSE	FALSE	FALSE	0.171774419370192
1	60154004	60104004	60204004	112	9	0.37738	127	0.010894	0.37492	0.503369	0.601527	0.680111	0.742326	0.775165	0.806654	0.359418	-1.97621	0.000390995	0.148412	0.887559	0.12635	0.129622	7.54545	80991.5	11.5972	FALSE	FALSE	FALSE	0.171793561887275
1	60254004	60204004	60304004	52	6	0.37547	79	0.0107644	0.20793	0.35824	0.46773	0.533342	0.599577	0.648484	0.692318	0.498911	-2.10196	0.000201574	0.105822	0.850725	0.0747601	0.199018	3.66667	671.06	3.3072	FALSE	FALSE	FALSE	0.172225568411528
1	60354004	60304004	60404004	108	6	0.38223	143	0.0157233	0.227839	0.401012	0.524092	0.634917	0.696109	0.724074	0.769373	0.431798	-2.04062	0.000364904	0.115727	0.858435	0.112546	0.198267	5.62963	1377.88	4.58523	FALSE	FALSE	FALSE	0.172410478341222
1	60454004	60404004	60504004	132	2	0.38736	145	0.0120545	0.233303	0.410667	0.524431	0.607552	0.669013	0.706	0.740653	0.444054	-1.95	0.000444251	0.124118	0.871421	0.105029	0.299437	4.66154	557.942	3.63586	FALSE	FALSE	FALSE	0.172435187657233
1	60554004	60504004	60604004	193	4	0.3737	173	0.0130674	0.178511	0.35344	0.511124	0.601147	0.675049	0.72072	0.785435	0.453511	-2.0335	0.000593768	0.133429	0.906649	0.109669	0.0486308	7.5567	18702.3	12.866	FALSE	FALSE	FALSE	0.172517857702493
1	60654004	60604004	60704004	175	6	0.38675	186	0.0207367	0.311486	0.456822	0.593854	0.703215	0.75308	0.796295	0.819659	0.366513	-1.82393	0.000567586	0.132738	0.846458	0.129629	0.121998	7.59091	49661.8	13.335	FALSE	FALSE	FALSE	0.172549495598634
1	60754004	60704004	60804004	161	5	0.3923	147	0.0150787	0.210661	0.358967	0.492618	0.624518	0.725757	0.802754	0.826306	0.422631	-2.00127	0.000550873	0.131487	0.871022	0.117101	0.0580473	8.07407	102106	16.8704	FALSE	FALSE	FALSE	0.172573432845827
1	60854004	60804004	60904004	144	1	0.37232	126	0.0116614	0.190129	0.340758	0.471	0.582557	0.696775	0.79425	0.826045	0.442641	-1.87361	0.000437347	0.139159	0.924119	0.117513	0.125452	8.23944	119527	10.5219	FALSE	FALSE	FALSE	0.172695996007341
1	61054004	61004004	61104004	83	2	0.39431	159	0.0193226	0.195762	0.318009	0.434496	0.536744	0.639149	0.699573	0.751395	0.489267	-1.74257	0.000257595	0.155235	0.837043	0.0912475	0.195504	4.28947	16132.3	3.41882	FALSE	FALSE	FALSE	0.172746707934193
1	61154004	61104004	61204004	53	2	0.3719	182	0.0391598	0.187272	0.365239	0.45408	0.515866	0.562297	0.589016	0.611858	0.530625	-1.64125	0.000147902	0.130204	0.637921	0.0664542	0.142397	2.39286	1241.93	12.3664	FALSE	FALSE	FALSE	0.172820307855581
1	61254004	61204004	61304004	189	5	0.38787	133	0.0165386	0.173649	0.312762	0.441872	0.546737	0.664481	0.738895	0.778984	0.477517	-1.84368	0.000592764	0.153024	0.880913	0.108566	0.293739	5.83871	1498.47	10.3734	FALSE	FALSE	FALSE	0.172881746860167
1	61454004	61404004	61504004	191	2	0.39513	118	0.0144226	0.229801	0.378161	0.511299	0.618741	0.720803	0.777826	0.813129	0.421463	-2.03444	0.000649258	0.153622	0.913634	0.127433	0.259521	7.98901	66047	11.7221	FALSE	FALSE	FALSE	0.172923874948569
1	61554004	61504004	61604004	157	4	0.39985	181	0.0211914	0.20905	0.389572	0.512059	0.623936	0.728782	0.790992	0.817305	0.418329	-1.86182	0.000537413	0.141351	0.842067	0.110425	0.350036	7	24647.2	4.92241	FALSE	FALSE	FALSE	0.172986796363334
1	61654004	61604004	61704004	109	7	0.36205	108	0.0149443	0.207067	0.366718	0.506385	0.630636	0.705006	0.75854	0.786369	0.434183	-1.89999	0.000459858	0.133283	0.887435	0.117006	0.206969	7.70909	45158.4	6.96412	FALSE	FALSE	FALSE	0.173017134362599
1	61754004	61704004	61804004	82	1	0.38559	100	0.0141893	0.256453	0.438286	0.558395	0.648011	0.722589	0.779341	0.805849	0.398725	-1.99163	0.000337459	0.126984	0.908896	0.127904	0.200044	4.09756	1598.51	1.88564	FALSE	FALSE	FALSE	0.173049597875608
1	61954004	61904004	62004004	200	1	0.39605	136	0.018522	0.261593	0.400316	0.517038	0.600642	0.696217	0.770236	0.811469	0.420356	-1.86646	0.000671686	0.126537	0.887659	0.111501	0.559144	8.11111	78726.4	16.0102	FALSE	FALSE	FALSE	0.17314534143235
1	62054004	62004004	62104004	67	5	0.39827	81	0.0153947	0.292082	0.476739	0.587604	0.686368	0.773052	0.807881	0.827734	0.364077	-1.82301	0.000294848	0.130568	0.927709	0.117845	0.350621	8.37838	126857	11.6763	FALSE	FALSE	FALSE	0.173202662273139
1	62154004	62104004	62204004	117	5	0.40337	94	0.0186529	0.219949	0.356201	0.486699	0.606366	0.698904	0.754558	0.807479	0.438549	-1.88096	0.000375488	0.125522	0.910657	0.106699	0.120835	6.31034	7198.1	12.7544	FALSE	FALSE	FALSE	0.1733795314445
1	62254004	62204004	62304004	109	4	0.38325	103	0.0180601	0.302412	0.46333	0.577627	0.668222	0.73211	0.786074	0.807796	0.380347	-1.90883	0.000483247	0.119428	0.899384	0.115157	0.203225	5.49091	1719.87	3.53645	FALSE	FALSE	FALSE	0.173532388626814
1	62354004	62304004	62404004	161	6	0.38013	119	0.0173054	0.211624	0.405859	0.545022	0.653103	0.729659	0.7646	0.793991	0.413735	-1.85516	0.000697989	0.137918	0.896331	0.122342	0.259831	4.3038	1387.72	11.0009	FALSE	FALSE	FALSE	0.173559170466979
1	62454004	62404004	62504004	103	4	0.38944	114	0.0188679	0.241448	0.415468	0.542398	0.650878	0.73318	0.773677	0.817834	0.403588	-2.05726	0.000519007	0.102679	0.869724	0.124408	0.243023	6.68	3796.58	7.0965	FALSE	FALSE	FALSE	0.173620631528115
1	62554004	62504004	62604004	148	3	0.40735	109	0.0166582	0.196949	0.381974	0.510955	0.614924	0.677911	0.737695	0.779746	0.442835	-1.99268	0.000699395	0.12977	0.89627	0.108313	0.416239	4.92105	533.256	3.39704	FALSE	FALSE	FALSE	0.173664177558474
1	62654004	62604004	62704004	151	4	0.37539	132	0.0152859	0.222089	0.37695	0.483306	0.57692	0.660587	0.712525	0.79153	0.453728	-1.94228	0.000538648	0.120294	0.897948	0.101218	0.236843	5.57143	970.569	5.07034	FALSE	FALSE	FALSE	0.173688583005485
1	62754004	62704004	62804004	120	3	0.39466	184	0.0248428	0.285621	0.429743	0.518805	0.613649	0.663259	0.691382	0.729074	0.438352	-1.87816	0.000466601	0.114825	0.758427	0.0893135	0.0685586	3.5	358.82	8.15846	FALSE	FALSE	FALSE	0.173691208938184
1	62854004	62804004	62904004	148	6	0.35667	151	0.0156383	0.29894	0.417545	0.51818	0.594999	0.674554	0.70078	0.722395	0.438944	-1.79749	0.000590842	0.125812	0.868414	0.109458	0.424068	4.02778	725.103	4.83577	FALSE	FALSE	FALSE	0.173772532180501
1	62954004	62904004	63004004	122	5	0.3814	152	0.0210331	0.276615	0.453759	0.54776	0.62847	0.691712	0.748043	0.777687	0.410851	-1.96877	0.000428818	0.112108	0.849585	0.102488	0.277531	5.40323	894.692	2.62428	FALSE	FALSE	FALSE	0.173774551600751
1	63054004	63004004	63104004	262	1	0.40825	216	0.0209564	0.280924	0.424271	0.546981	0.624664	0.692371	0.725642	0.75768	0.421067	-1.67416	0.000802632	0.126387	0.861717	0.0973776	0.729252	4.97744	400.386	2.08125	FALSE	FALSE	FALSE	0.174077712231266
1	63254004	63204004	63304004	222	1	0.41044	227	0.0314749	0.178669	0.306181	0.38925	0.508297	0.589144	0.632016	0.672165	0.53204	-1.54166	0.000631916	0.108529	0.745762	0.0738959	0.464139	4.86486	766.453	15.5648	FALSE	FALSE	FALSE	0.17412124684754
1	63854004	63804004	63904004	188	7	0.37644	137	0.0167938	0.290041	0.425366	0.529225	0.597368	0.687975	0.743731	0.773439	0.421836	-1.95012	0.000628898	0.141459	0.909784	0.103171	0.470704	3.76344	558.557	3.02664	FALSE	FALSE	FALSE	0.174165751118094
1	63954004	63904004	64004004	115	4	0.38767	132	0.0150943	0.200365	0.330864	0.416655	0.488199	0.549286	0.596456	0.639202	0.539853	-1.9143	0.000389145	0.141252	0.864892	0.0808236	0.163515	5.05085	371.077	2.38582	FALSE	FALSE	FALSE	0.174676449323302
1	64054004	64004004	64104004	121	4	0.37888	156	0.0203233	0.201233	0.329796	0.439398	0.535304	0.606884	0.657332	0.700839	0.504173	-1.83079	0.000366463	0.131483	0.854892	0.0942935	0.0631646	5.13115	1843.47	4.37031	FALSE	FALSE	FALSE	0.174771012888141
1	64154004	64104004	64204004	92	5	0.37186	139	0.0138775	0.163055	0.287511	0.391637	0.480851	0.548159	0.590429	0.630358	0.558286	-2.10182	0.000357961	0.104632	0.771121	0.0806409	0.139485	4.56818	1492.52	6.34518	FALSE	FALSE	FALSE	0.175098466928535
1	64254004	64204004	64304004	209	4	0.39395	183	0.0131504	0.167298	0.287011	0.38519	0.467581	0.540151	0.604654	0.658488	0.555661	-1.91703	0.000646773	0.113738	0.872602	0.083736	0.25024	5.51429	1006.91	9.06453	FALSE	FALSE	FALSE	0.175125517743048
1	64354004	64304004	64404004	151	3	0.38308	158	0.0146612	0.206813	0.342327	0.463859	0.524335	0.614969	0.658452	0.723914	0.495047	-1.8491	0.000440453	0.118655	0.901641	0.0907421	0.256968	5.89189	982.563	1.82344	FALSE	FALSE	FALSE	0.17519402725777
1	64454004	64404004	64504004	150	4	0.38423	133	0.0134172	0.152985	0.297917	0.435015	0.547022	0.626449	0.730331	0.766763	0.491931	-1.99528	0.000474838	0.106048	0.909369	0.0945267	0.439034	8.4026	58075.2	4.35676	FALSE	FALSE	FALSE	0.175253003699662
1	64554004	64504004	64604004	151	4	0.386	132	0.0132867	0.220308	0.37333	0.516638	0.615924	0.689872	0.773147	0.79469	0.43087	-1.96193	0.000561229	0.105505	0.88988	0.113834	0.129642	6.46154	9187.86	10.1471	FALSE	FALSE	FALSE	0.175383115932137
1	64654004	64604004	64704004	146	6	0.37067	179	0.0154648	0.191886	0.331472	0.438027	0.532045	0.605199	0.660484	0.703198	0.505384	-1.93153	0.000521555	0.10136	0.848073	0.0844217	0.259525	3.55556	165.275	1.61525	FALSE	FALSE	FALSE	0.175424660042418
1	64754004	64704004	64804004	94	8	0.3816	129	0.0128462	0.224735	0.393639	0.486159	0.553945	0.606206	0.648715	0.683303	0.486186	-1.92763	0.000434069	0.129331	0.851145	0.0957457	0.127912	3.08333	104.036	0.705056	FALSE	FALSE	FALSE	0.175473427013634
1	64854004	64804004	64904004	74	5	0.36651	96	0.0158933	0.393464	0.536071	0.612675	0.669497	0.723035	0.764435	0.794307	0.358074	-2.14069	0.0004166	0.101526	0.909979	0.113706	0.00549336	6.77143	47180	2.46094	FALSE	FALSE	FALSE	0.175566976796415
1	64954004	64904004	65004004	110	3	0.37533	107	0.0140652	0.239434	0.437702	0.54946	0.658584	0.746179	0.824659	0.849899	0.384869	-2.14299	0.000362817	0.122865	0.946518	0.127246	0.0488667	8.07692	79315.4	20.7993	FALSE	FALSE	FALSE	0.175583647358189
1	65054004	65004004	65104004	116	6	0.37747	118	0.0156148	0.195202	0.344142	0.449871	0.552575	0.647976	0.708701	0.744292	0.479606	-1.97399	0.000422614	0.111937	0.859196	0.0932246	0.122803	7.88525	73329.1	8.37817	FALSE	FALSE	FALSE	0.175654176022406
1	65154004	65104004	65204004	117	3	0.4025	111	0.0131162	0.221449	0.377452	0.485151	0.573177	0.657342	0.706054	0.774522	0.457836	-1.91578	0.00030654	0.126548	0.916005	0.108755	0.311943	7.9322	54200.7	7.53663	FALSE	FALSE	FALSE	0.175702847895521
1	65254004	65204004	65304004	137	4	0.37426	160	0.0145526	0.207821	0.364351	0.471447	0.561098	0.648017	0.703167	0.742936	0.471595	-1.85704	0.000396357	0.134118	0.869733	0.0941922	0.210765	5.19118	23631	18.7248	FALSE	FALSE	FALSE	0.175720743312404
1	65354004	65304004	65404004	161	5	0.37146	155	0.0131255	0.407316	0.516833	0.588722	0.648934	0.690968	0.725862	0.756839	0.380647	-1.41149	0.000462982	0.185643	0.897637	0.183316	0.413783	6.55696	55146.6	175.357	FALSE	FALSE	FALSE	0.175821386126607
1	65454004	65404004	65504004	122	8	0.39736	135	0.0153624	0.36738	0.494889	0.605049	0.67193	0.740689	0.780892	0.811923	0.361035	-2.06802	0.000517532	0.171383	0.919612	0.145119	0.174918	7.42857	27864.7	12.0505	FALSE	FALSE	FALSE	0.175826191802865
1	65554004	65504004	65604004	145	6	0.38937	166	0.0201692	0.352558	0.485663	0.606158	0.716748	0.766295	0.78968	0.811352	0.353078	-1.95244	0.000680462	0.180044	0.886069	0.142211	0.271614	4.72222	472.919	2.95826	FALSE	FALSE	FALSE	0.176018458380324
1	65654004	65604004	65704004	111	4	0.36708	112	0.0151283	0.310723	0.492284	0.643549	0.717982	0.760781	0.794809	0.818807	0.351581	-1.88409	0.000436292	0.167715	0.931039	0.144604	0.223594	4.46296	882.718	8.95875	FALSE	FALSE	FALSE	0.176089617334448
1	65754004	65704004	65804004	165	3	0.40274	108	0.0151706	0.231422	0.425909	0.57913	0.685302	0.741486	0.771919	0.806872	0.393994	-1.87647	0.000574059	0.16516	0.923393	0.12421	0.287459	6.20482	3181.49	4.19881	FALSE	FALSE	FALSE	0.176148119361997
1	65854004	65804004	65904004	159	4	0.3551	189	0.0204501	0.276404	0.457092	0.550745	0.630402	0.678094	0.710386	0.740572	0.422329	-1.85987	0.000580121	0.161726	0.873353	0.11148	0.0934919	3.7	1004.81	0.43925	FALSE	FALSE	FALSE	0.176161481726105
1	65954004	65904004	66004004	183	3	0.38175	198	0.0201395	0.558264	0.67224	0.730862	0.776884	0.807823	0.83064	0.847369	0.253703	-1.43796	0.00075007	0.135601	0.873362	0.206989	0.396278	5.42857	993.629	4.29404	FALSE	FALSE	FALSE	0.176387463784017
1	66054004	66004004	66104004	187	6	0.36857	211	0.0247536	0.522262	0.659944	0.751436	0.800157	0.840417	0.854244	0.865243	0.243757	-0.886585	0.000804732	0.252092	0.884538	0.213964	0.230626	3.98925	436.084	5.02518	FALSE	FALSE	FALSE	0.176500859447111
1	66154004	66104004	66204004	276	3	0.39694	169	0.0197111	0.480321	0.664921	0.738892	0.794309	0.832129	0.863054	0.874071	0.250329	-0.0513094	0.00108642	0.250515	0.896224	0.218908	2.4241	6.63309	38396.7	170.397	FALSE	FALSE	FALSE	0.176600213392968
1	66254004	66204004	66304004	213	2	0.38213	137	0.0193108	0.503038	0.627864	0.711895	0.785708	0.823363	0.84704	0.867309	0.261969	-1.02398	0.000826092	0.140049	0.921452	0.188772	0.191115	7.85321	136642	39.7661	FALSE	FALSE	FALSE	0.176648457092998
1	66354004	66304004	66404004	250	1	0.38711	208	0.0204277	0.688464	0.756061	0.801112	0.834566	0.860727	0.882726	0.894732	0.183087	0.13325	0.00104968	0.344782	0.903359	0.360866	1.28543	7.65323	164382	168.761	FALSE	FALSE	FALSE	0.176905839637879
1	66454004	66404004	66504004	297	3	0.40731	165	0.0279525	0.516876	0.706998	0.775324	0.813336	0.836669	0.857735	0.877993	0.230724	-0.0375331	0.00128291	0.248521	0.826534	0.26886	2.61402	6.25	199999	1408.56	FALSE	FALSE	FALSE	0.176996352860462
1	66554004	66504004	66604004	290	2	0.4145	194	0.0335502	0.741421	0.790711	0.821252	0.846505	0.863485	0.878184	0.892018	0.166632	0.471973	0.00125598	0.168947	0.918936	0.404592	3.21627	6	199999	1584.07	FALSE	FALSE	FALSE	0.177093715109829
1	66654004	66604004	66704004	308	2	0.40139	188	0.033999	0.736396	0.794203	0.829981	0.856649	0.873228	0.884082	0.896664	0.161257	0.233909	0.00144773	0.14469	0.916489	0.412182	3.44655	6.5	161735	726.501	FALSE	FALSE	FALSE	0.177205539762929
1	66754004	66704004	66804004	243	2	0.38761	203	0.0289878	0.565297	0.662534	0.715745	0.766454	0.795318	0.822848	0.847133	0.260667	-0.817481	0.000943501	0.151606	0.89962	0.216172	1.04876	6.57143	105965	14.2413	FALSE	FALSE	FALSE	0.177263863594046
1	66854004	66804004	66904004	463	5	0.38918	229	0.028363	0.590308	0.7099	0.762182	0.804802	0.822921	0.839582	0.854722	0.230798	0.0763418	0.00176467	0.0939893	0.811307	0.296872	13.6358	5.73276	96133.3	2173.11	FALSE	FALSE	FALSE	0.177326629618206
1	66954004	66904004	67004004	334	5	0.39754	186	0.016081	0.761078	0.795675	0.826679	0.851188	0.871014	0.886767	0.896768	0.15869	0.0885841	0.00174293	0.0904977	0.866727	0.568115	30.7527	4.30769	199999	10945.7	FALSE	FALSE	FALSE	0.177545022416596
1	67054004	67004004	67104004	234	1	0.39539	158	0.0297801	0.693825	0.764977	0.814233	0.852361	0.867146	0.880358	0.89169	0.176487	-0.645963	0.000795568	0.09995	0.831415	0.41895	5.38266	4.33913	199999	7414.01	FALSE	FALSE	FALSE	0.177634363810109
1	67154004	67104004	67204004	291	6	0.36642	248	0.0203592	0.560729	0.671911	0.748312	0.802744	0.822778	0.839326	0.85133	0.243267	-0.729408	0.000874887	0.0964083	0.871433	0.312257	2.90031	5.5625	171520	1542.6	FALSE	FALSE	FALSE	0.177682941542713
1	67254004	67204004	67304004	165	10	0.37094	148	0.0160473	0.341965	0.510658	0.645354	0.685598	0.741863	0.767085	0.797731	0.358535	-1.59023	0.000527441	0.0770532	0.806187	0.207697	0.326128	6.96471	153316	359.541	FALSE	FALSE	TRUE	0.177791414421606
1	67354004	67304004	67404004	380	4	0.4125	277	0.0318934	0.36091	0.508375	0.612788	0.677701	0.738033	0.771205	0.789553	0.363062	-0.397537	0.00159688	0.155825	0.643997	0.153074	1.55915	7.07937	77912.3	44.4544	FALSE	FALSE	FALSE	0.178350672999092
1	67454004	67404004	67504004	155	9	0.37107	192	0.0316088	0.518205	0.630022	0.726681	0.770149	0.805925	0.823676	0.837921	0.269632	-0.80476	0.000649691	0.109991	0.861201	0.248561	0.677423	5.61333	9122.08	74.2844	FALSE	FALSE	FALSE	0.178472083048528
1	67554004	67504004	67604004	151	3	0.40126	177	0.0231996	0.330575	0.438519	0.537774	0.606872	0.650996	0.682965	0.714444	0.433979	-1.42267	0.000580146	0.0988287	0.773628	0.1085	0.236761	4.28571	746.568	9.69441	FALSE	FALSE	FALSE	0.178541904952781
1	67654004	67604004	67704004	149	1	0.38487	125	0.0178127	0.361487	0.48014	0.585464	0.677425	0.75309	0.792149	0.819531	0.361531	-1.72155	0.00051099	0.118779	0.894339	0.12387	0.0102719	5.26667	760.479	4.37152	FALSE	FALSE	FALSE	0.179011557957492
1	67754004	67704004	67804004	164	4	0.39284	165	0.0211305	0.252316	0.390156	0.501498	0.580511	0.635304	0.676527	0.709488	0.464886	-1.57448	0.000591843	0.142151	0.838164	0.100532	0.152951	3.59756	262.827	3.07694	FALSE	FALSE	FALSE	0.179189549569958
1	67854004	67804004	67904004	156	7	0.37814	195	0.0260442	0.235321	0.377583	0.480729	0.546087	0.591037	0.633968	0.665395	0.495697	-1.56319	0.000595711	0.135256	0.789739	0.0927697	0.264624	2.91026	140.994	2.40222	FALSE	FALSE	FALSE	0.179276008938056
1	67954004	67904004	68004004	160	2	0.42453	207	0.029717	0.512803	0.63747	0.711793	0.745276	0.775588	0.800344	0.820002	0.285246	-0.980928	0.000672165	0.0894134	0.850576	0.229654	0.6934	4.625	663.856	12.7922	FALSE	FALSE	FALSE	0.179347169996158
1	68054004	68004004	68104004	85	5	0.36194	188	0.0230855	0.268265	0.421867	0.50493	0.573183	0.633177	0.669458	0.698562	0.461508	-1.67325	0.000324463	0.146567	0.747831	0.102985	0.427489	5.31707	499.097	2.50869	FALSE	FALSE	FALSE	0.179487395004996
1	68154004	68104004	68204004	76	12	0.35712	105	0.0170473	0.376145	0.498235	0.59478	0.683376	0.719813	0.750939	0.778576	0.371162	-1.77712	0.000318702	0.24296	0.857631	0.13184	0.0734778	3.97436	990.467	4.71712	FALSE	FALSE	FALSE	0.179494086425296
1	68254004	68204004	68304004	66	4	0.37004	116	0.0118163	0.250252	0.409058	0.517795	0.602768	0.658412	0.689471	0.711433	0.451544	-1.99733	0.000262471	0.215068	0.77847	0.115458	0.24364	6.45455	84962.1	55.139	FALSE	FALSE	FALSE	0.179499513174722
1	68354004	68304004	68404004	241	6	0.38584	167	0.0189462	0.41253	0.511074	0.576589	0.626066	0.666689	0.696623	0.719004	0.398775	-1.29219	0.000777705	0.187448	0.828178	0.168448	0.596827	5.07377	6777.67	118.208	FALSE	FALSE	FALSE	0.179559493653055
1	68454004	68404004	68504004	128	6	0.38399	154	0.0189171	0.300378	0.405349	0.507431	0.576359	0.630749	0.681139	0.721481	0.453873	-1.74763	0.000456496	0.178836	0.848446	0.0901254	0.348889	3.73016	258.165	2.06825	FALSE	FALSE	FALSE	0.179629931896929
1	68554004	68504004	68604004	240	4	0.37887	137	0.0151992	0.208909	0.378408	0.477658	0.567921	0.642085	0.703134	0.75681	0.466439	-1.73303	0.00072894	0.142532	0.914764	0.0964207	0.308626	4.39496	211.152	2.68788	FALSE	FALSE	FALSE	0.179670250985895
1	68654004	68604004	68704004	195	7	0.38681	159	0.0184164	0.165755	0.284738	0.392039	0.487912	0.557034	0.614984	0.65995	0.548227	-1.75188	0.000603049	0.106133	0.853261	0.0805913	0.065082	3.24752	144.866	2.02018	FALSE	FALSE	FALSE	0.179960227666392
1	68754004	68704004	68804004	266	2	0.38109	222	0.0194827	0.337149	0.454174	0.514693	0.555813	0.590306	0.621318	0.641197	0.469336	-1.19193	0.000759788	0.0993556	0.644615	0.108325	0.453189	5.44961	32289.1	306.92	FALSE	FALSE	FALSE	0.179982956340596
1	68854004	68804004	68904004	294	4	0.4099	191	0.021435	0.587917	0.673604	0.733187	0.774643	0.798609	0.818322	0.839916	0.2534	-0.366586	0.00105083	0.108184	0.856438	0.29507	1.16126	6.5102	53006.4	504.691	FALSE	FALSE	FALSE	0.180051081534418
1	68954004	68904004	69004004	372	4	0.38129	203	0.0188172	0.30191	0.451251	0.503278	0.554338	0.593882	0.629999	0.659505	0.472262	-0.203057	0.00123182	0.0962488	0.716675	0.123894	1.34033	4.86096	8585.3	503.734	FALSE	FALSE	FALSE	0.180062143762468
1	69054004	69004004	69104004	133	8	0.37832	136	0.0152267	0.348829	0.448134	0.531039	0.580882	0.633131	0.66938	0.720091	0.438359	-1.75041	0.000459077	0.123584	0.827598	0.0989945	0.218471	6.78261	38111.5	27.5507	FALSE	FALSE	FALSE	0.180071743584819
1	69154004	69104004	69204004	151	5	0.3725	156	0.0130784	0.148852	0.282884	0.403429	0.5169	0.59089	0.650297	0.703296	0.529065	-2.10948	0.000423496	0.129207	0.876271	0.0841481	0.387068	4.45205	371.967	3.71395	FALSE	FALSE	FALSE	0.180094006344352
1	69254004	69204004	69304004	143	9	0.36615	185	0.0178124	0.203883	0.38722	0.518875	0.586822	0.632867	0.666678	0.69766	0.472285	-1.76878	0.000479352	0.147087	0.825023	0.0964495	0.233732	5.7027	6042.44	3.78589	FALSE	FALSE	FALSE	0.18011622878525
1	69354004	69304004	69404004	186	4	0.40684	170	0.0158923	0.287964	0.517361	0.617698	0.681592	0.721876	0.758782	0.778684	0.376577	-1.47929	0.000642239	0.177263	0.90338	0.127265	0.310646	5.38462	2144.87	13.5419	FALSE	FALSE	FALSE	0.180216245301
1	69454004	69404004	69504004	173	10	0.38193	179	0.0205766	0.370065	0.521567	0.596006	0.647733	0.683281	0.714585	0.7404	0.38948	-1.60612	0.000538934	0.177967	0.813344	0.114679	0.264094	7.05882	117641	179.571	FALSE	FALSE	FALSE	0.180229532661384
1	69554004	69504004	69604004	169	3	0.38807	93	0.0116482	0.783065	0.836626	0.863363	0.882121	0.896715	0.914399	0.922483	0.128747	-0.207589	0.000593835	0.31601	0.956225	0.560502	2.67457	4.15116	38106.5	2877.42	FALSE	FALSE	FALSE	0.180270784418544
1	69654004	69604004	69704004	163	2	0.39147	154	0.0122314	0.267541	0.435058	0.595306	0.666656	0.730806	0.785144	0.820666	0.385546	-1.83967	0.000592897	0.169293	0.915102	0.136694	0.144224	8.45783	183827	54.1091	FALSE	FALSE	FALSE	0.180362610144268
1	69754004	69704004	69804004	164	7	0.37162	153	0.0141126	0.249954	0.405423	0.531876	0.623573	0.688592	0.731139	0.761165	0.429754	-1.72951	0.000511873	0.174849	0.871115	0.117889	0.00337645	7.425	18555.1	76.5705	FALSE	FALSE	FALSE	0.180444085335103
1	69854004	69804004	69904004	144	7	0.36504	179	0.0189116	0.228397	0.410987	0.535585	0.647971	0.701276	0.741369	0.762146	0.42461	-1.59562	0.00048446	0.170903	0.844451	0.118445	0.285088	4.79167	875.115	10.6061	FALSE	FALSE	FALSE	0.180463789564561
1	69954004	69904004	70004004	139	6	0.39027	134	0.0109045	0.35095	0.489903	0.614365	0.673569	0.722139	0.75652	0.775516	0.373863	-1.81452	0.00050388	0.17774	0.919271	0.120273	0.452357	4.97059	568.288	5.83321	FALSE	FALSE	FALSE	0.180532260855721
1	70054004	70004004	70104004	106	5	0.40778	115	0.0109766	0.356841	0.478701	0.550871	0.622291	0.687468	0.729545	0.729902	0.40634	-1.8744	0.000424678	0.173621	0.927618	0.115492	0.172353	4.83636	625.069	2.36335	FALSE	FALSE	FALSE	0.180610209332085
1	70254004	70204004	70304004	169	3	0.39434	150	0.0112098	0.35606	0.55109	0.645011	0.711457	0.74903	0.791545	0.827159	0.338378	-1.93293	0.000577265	0.171909	0.935455	0.160155	0.178826	8.12941	139538	55.4131	FALSE	FALSE	FALSE	0.180643365795774
1	70354004	70304004	70404004	139	4	0.38349	125	0.010995	0.288874	0.438417	0.563159	0.624323	0.683169	0.73259	0.76493	0.414934	-1.83484	0.00051563	0.19041	0.909417	0.123411	0.165508	8.40909	130494	4.0454	FALSE	FALSE	FALSE	0.180693449773912
1	70554004	70504004	70604004	224	3	0.38378	134	0.0155267	0.640814	0.742717	0.795567	0.829935	0.860662	0.879058	0.895486	0.19368	-0.89733	0.000829002	0.302582	0.951855	0.349103	1.39997	6.30973	62422.8	620.651	FALSE	FALSE	FALSE	0.180821935789388
1	70654004	70604004	70704004	146	8	0.39128	139	0.0130094	0.310727	0.55137	0.668223	0.768177	0.800538	0.826367	0.838049	0.319507	-1.74962	0.000582831	0.24123	0.920133	0.158224	0.391798	7.27778	156205	271.001	FALSE	FALSE	FALSE	0.180841086239871
1	70754004	70704004	70804004	101	7	0.37797	138	0.0136995	0.240339	0.42153	0.511313	0.583178	0.662008	0.718677	0.746872	0.445155	-2.01728	0.000466401	0.168067	0.848158	0.100693	0.169111	7.17647	69145.3	10.7017	FALSE	FALSE	FALSE	0.180849811532494
1	70854004	70804004	70904004	139	3	0.40314	102	0.0129858	0.311395	0.515094	0.702963	0.806665	0.850304	0.871286	0.88136	0.294419	-1.85885	0.000507205	0.177648	0.947103	0.1612	0.528829	7.87324	104558	46.4848	FALSE	FALSE	FALSE	0.180948865423234
1	70954004	70904004	71004004	90	3	0.37741	102	0.0124389	0.208468	0.392009	0.541982	0.661775	0.729675	0.754861	0.773765	0.419638	-1.91105	0.000293069	0.171363	0.847715	0.125281	0.0935047	8.61364	199999	22.7898	FALSE	FALSE	FALSE	0.181320532967454
1	71054004	71004004	71104004	149	4	0.397	126	0.0102571	0.208848	0.393498	0.526125	0.639107	0.69133	0.736852	0.776082	0.432594	-1.88377	0.000456351	0.168471	0.896904	0.119209	0.17387	8.14667	103621	15.2381	FALSE	FALSE	FALSE	0.181379353002004
1	71154004	71104004	71204004	141	11	0.36076	161	0.0111959	0.249859	0.385253	0.500001	0.607206	0.699774	0.735263	0.756644	0.438	-1.90493	0.000435845	0.17258	0.910803	0.113314	0.158327	5.53623	1786.15	5.29489	FALSE	FALSE	FALSE	0.181526705259535
1	71254004	71204004	71304004	148	3	0.38576	125	0.00930648	0.297433	0.460058	0.576721	0.672257	0.735402	0.782048	0.812315	0.380538	-1.89987	0.000489295	0.176725	0.935097	0.113181	0.0977188	6.64	3860.63	10.5307	FALSE	FALSE	FALSE	0.181589458037854
1	71354004	71304004	71404004	149	6	0.36346	166	0.0100038	0.241672	0.380762	0.499034	0.570888	0.644833	0.702353	0.758239	0.45746	-1.65042	0.00044759	0.140339	0.907114	0.0902515	0.246016	2.90909	74.7811	1.27976	FALSE	FALSE	FALSE	0.181900463902849
1	71454004	71404004	71504004	177	7	0.38611	192	0.0126141	0.224175	0.369879	0.48197	0.58174	0.65808	0.708101	0.741794	0.462037	-1.70521	0.000568972	0.196403	0.857586	0.0956668	0.299386	3.97619	260.617	2.11968	FALSE	FALSE	FALSE	0.181919577110612
1	71554004	71504004	71604004	281	5	0.34497	201	0.0135187	0.273522	0.45716	0.548507	0.609655	0.660735	0.712616	0.739507	0.428328	-0.862282	0.000884946	0.125383	0.834114	0.120174	0.780479	5.62676	1746.6	23.1635	FALSE	FALSE	FALSE	0.181921472380858
1	71654004	71604004	71704004	174	5	0.35466	142	0.0122172	0.274475	0.449636	0.556763	0.646344	0.713976	0.768974	0.795677	0.399165	-1.79665	0.000590415	0.172541	0.914575	0.117759	0.600059	7.77273	46339.3	12.582	FALSE	FALSE	FALSE	0.181966953316972
1	71754004	71704004	71804004	138	5	0.38786	108	0.0105733	0.194192	0.362831	0.526163	0.609646	0.672858	0.730289	0.762416	0.448801	-1.98093	0.00058612	0.162034	0.913524	0.0976435	0.378208	5.9	4804.33	6.09958	FALSE	FALSE	FALSE	0.182016325380052
1	71854004	71804004	71904004	131	5	0.39314	101	0.0113784	0.364858	0.528219	0.633348	0.730229	0.820984	0.854394	0.878941	0.312718	-1.6613	0.000493495	0.283239	0.950105	0.140725	0.266604	6.375	48440.6	6.03926	FALSE	FALSE	FALSE	0.182075895659903
1	71954004	71904004	72004004	161	3	0.38928	112	0.0116411	0.373104	0.507824	0.63691	0.747455	0.825739	0.862435	0.890556	0.307997	-1.61974	0.000541182	0.274378	0.960826	0.146835	0.161004	8.225	86436.9	11.1808	FALSE	FALSE	FALSE	0.182131536212768
1	72054004	72004004	72104004	139	4	0.38474	166	0.0166508	0.293515	0.421915	0.542139	0.645909	0.733816	0.782166	0.819015	0.394504	-1.6012	0.000449302	0.230412	0.892393	0.120629	0.11257	4.83099	12070.2	5.82112	FALSE	FALSE	FALSE	0.182138953597388
1	72154004	72104004	72204004	160	2	0.38866	105	0.0112814	0.322877	0.488029	0.616617	0.709653	0.779413	0.81634	0.852143	0.34499	-1.73538	0.000518684	0.219107	0.931417	0.132237	0.400602	7.7875	51799	21.4445	FALSE	FALSE	FALSE	0.182219151272745
1	72254004	72204004	72304004	125	12	0.34618	121	0.0172579	0.237026	0.364761	0.478661	0.579923	0.669835	0.755166	0.801801	0.444689	-1.8165	0.000414357	0.205454	0.88873	0.101876	0.432517	7.85	79597	7.16468	FALSE	TRUE	FALSE	0.182291483928468
1	72354004	72304004	72404004	161	2	0.38318	185	0.0219149	0.301746	0.42921	0.547509	0.655463	0.7209	0.783963	0.810335	0.392982	-1.6417	0.000499928	0.2221	0.862705	0.109725	0.499617	4.87805	968.251	16.8355	FALSE	FALSE	FALSE	0.182365274333899
1	72454004	72404004	72504004	130	8	0.3805	127	0.0147073	0.436067	0.565268	0.674164	0.775422	0.822078	0.864625	0.883412	0.282709	-1.69868	0.000480507	0.321012	0.907693	0.152674	0.265713	4.13636	344.219	5.98436	FALSE	TRUE	FALSE	0.182403130728739
1	72554004	72504004	72604004	116	2	0.39708	106	0.0113316	0.342582	0.489548	0.631341	0.740608	0.829066	0.874648	0.889731	0.314639	-1.43999	0.00037592	0.286053	0.927666	0.163667	0.256661	4.96491	1114.08	5.7306	FALSE	TRUE	FALSE	0.182673727233995
1	72754004	72704004	72804004	140	1	0.40588	124	0.0135669	0.345268	0.506505	0.628326	0.732096	0.82424	0.864707	0.886935	0.315989	-1.54711	0.000521635	0.272457	0.914436	0.159733	0.273951	6.08696	7828.98	18.0725	FALSE	FALSE	FALSE	0.182685084790768
1	73154004	73104004	73204004	80	2	0.39276	118	0.0259434	0.280468	0.450808	0.581329	0.702764	0.791024	0.832408	0.858771	0.35749	-1.63139	0.00028263	0.237944	0.884613	0.131103	0.0930439	4.51282	491.183	7.54725	FALSE	FALSE	FALSE	0.182738169138847
1	73354004	73304004	73404004	134	5	0.39689	147	0.0147846	0.2833	0.429376	0.549364	0.662793	0.766799	0.830963	0.861546	0.373694	-1.74848	0.000452699	0.245534	0.922295	0.129693	0.3281	4.37143	257.684	2.25292	FALSE	TRUE	FALSE	0.18277155028856
1	73454004	73404004	73504004	151	5	0.37705	123	0.0112041	0.29652	0.44739	0.579739	0.703187	0.797577	0.842474	0.871464	0.351664	-1.6577	0.000515482	0.262401	0.91851	0.148806	0.274197	5.22973	522.885	2.90227	FALSE	FALSE	FALSE	0.182787426538848
1	73554004	73504004	73604004	147	7	0.39359	123	0.0108245	0.20785	0.377447	0.511008	0.632385	0.693282	0.748402	0.790787	0.43412	-1.824	0.000515476	0.213728	0.903915	0.110694	0.287308	6.5	6540.68	4.82254	FALSE	FALSE	TRUE	0.182916201222338
1	73654004	73604004	73704004	143	1	0.38426	139	0.0149976	0.254827	0.472888	0.584226	0.676473	0.760241	0.809451	0.8583	0.369085	-1.64817	0.0004286	0.193132	0.882727	0.135537	0.118522	6.09722	3019.03	7.51179	FALSE	FALSE	FALSE	0.182954274839582
1	73754004	73704004	73804004	141	5	0.36748	110	0.0116419	0.215296	0.402936	0.518706	0.60609	0.664416	0.718907	0.754081	0.445652	-1.81317	0.000435659	0.172295	0.908865	0.098068	0.511719	3.22857	179.751	1.36036	FALSE	FALSE	FALSE	0.182987398176557
1	73854004	73804004	73904004	163	4	0.40086	120	0.0138905	0.240677	0.404976	0.536149	0.658776	0.75736	0.819526	0.851567	0.390138	-1.83895	0.000471522	0.169424	0.925403	0.114673	0.904714	6.06098	4231.12	11.486	FALSE	FALSE	FALSE	0.183053563328716
1	73954004	73904004	74004004	203	1	0.39858	128	0.00917062	0.193504	0.38233	0.534119	0.677465	0.750577	0.80989	0.843315	0.401257	-1.75788	0.00063697	0.176344	0.943825	0.11978	0.477735	7.5534	65711.2	5.7565	FALSE	FALSE	FALSE	0.183065340591308
1	74054004	74004004	74104004	152	4	0.40496	142	0.0153509	0.199523	0.342626	0.472484	0.577538	0.648439	0.693759	0.742576	0.474722	-1.8962	0.000452296	0.149836	0.878162	0.094059	0.626748	8.36486	105149	6.62362	FALSE	FALSE	FALSE	0.183172411744549
1	74154004	74104004	74204004	118	6	0.37989	123	0.0120989	0.215023	0.40283	0.544492	0.664845	0.750055	0.791485	0.822252	0.401288	-1.81955	0.00036676	0.164067	0.920007	0.124966	0.194218	8.43333	128145	14.4869	FALSE	FALSE	FALSE	0.183413634604185
1	74254004	74204004	74304004	179	3	0.38646	161	0.0131759	0.283113	0.418747	0.547235	0.666457	0.727708	0.760062	0.788555	0.401161	-1.57144	0.000527017	0.175074	0.87966	0.113183	0.4814	8.52809	162311	16.6404	FALSE	FALSE	FALSE	0.183503386614304
1	74354004	74304004	74404004	185	7	0.36923	154	0.0122727	0.31157	0.455862	0.558093	0.641272	0.697698	0.744112	0.773675	0.402531	-1.53679	0.000586795	0.173019	0.863537	0.12945	0.581091	6.7957	26639.2	39.8414	FALSE	TRUE	FALSE	0.183647694765811
1	74454004	74404004	74504004	73	8	0.36311	125	0.0165417	0.32325	0.479126	0.587311	0.660713	0.727496	0.769937	0.788192	0.380568	-1.68736	0.000323808	0.244793	0.862086	0.116018	0.089626	1.55263	71.1224	1.12469	FALSE	FALSE	FALSE	0.183906632486716
1	74554004	74504004	74604004	80	4	0.36367	97	0.0191824	0.230805	0.439652	0.572662	0.69164	0.77813	0.813444	0.841066	0.376086	-1.53579	0.000273178	0.171144	0.936834	0.145277	0.0426149	6.88571	30165.5	12.8779	FALSE	FALSE	FALSE	0.184055647249858
1	74654004	74604004	74704004	140	2	0.38758	88	0.0116801	0.321063	0.521539	0.659204	0.748513	0.837671	0.88441	0.906156	0.303063	-1.50406	0.000520694	0.224888	0.940454	0.149882	0.222162	8	114986	16.5861	FALSE	FALSE	FALSE	0.18405982271137
1	74754004	74704004	74804004	220	6	0.37642	152	0.0144654	0.42972	0.587086	0.667902	0.73021	0.787813	0.827207	0.859861	0.301457	-1.04399	0.000741364	0.297451	0.880299	0.162066	0.518823	6.78378	28981	39.5979	FALSE	FALSE	FALSE	0.184079288587943
1	74854004	74804004	74904004	158	9	0.36667	169	0.0167582	0.344801	0.479901	0.579379	0.66086	0.729839	0.784333	0.809284	0.373086	-1.47802	0.000488065	0.216746	0.893914	0.122671	0.185103	3.91026	270.679	3.80627	FALSE	FALSE	FALSE	0.184104067582121
1	74954004	74904004	75004004	144	6	0.36364	116	0.0110936	0.272793	0.489418	0.644806	0.726828	0.776326	0.797065	0.814964	0.353971	-1.70433	0.000471157	0.184162	0.920862	0.154789	0.170692	7.53521	39461.2	22.763	FALSE	FALSE	FALSE	0.18410881949585
1	75054004	75004004	75104004	147	7	0.3745	119	0.0118085	0.326322	0.496857	0.641526	0.744184	0.782097	0.812112	0.836705	0.337171	-1.55019	0.000531793	0.20184	0.92611	0.155534	0.431707	6	2358.77	6.28054	FALSE	FALSE	FALSE	0.184236187834154
1	75154004	75104004	75204004	136	5	0.36661	114	0.0110988	0.337576	0.507066	0.621151	0.698805	0.758744	0.796266	0.818571	0.351689	-1.95258	0.000616989	0.212861	0.91611	0.125914	0.21688	5.08696	615.15	2.94841	FALSE	FALSE	FALSE	0.184673309746275
1	75254004	75204004	75304004	158	6	0.37327	134	0.0203009	0.278365	0.399492	0.510219	0.615701	0.668883	0.729994	0.779278	0.431153	-1.97403	0.000623685	0.17017	0.864398	0.107697	0.480253	5.74359	1838.7	6.90051	FALSE	FALSE	FALSE	0.185020987454291
1	75354004	75304004	75404004	142	6	0.38097	143	0.0137302	0.23713	0.32943	0.412048	0.49058	0.549183	0.610354	0.662859	0.529774	-1.58224	0.000449654	0.153427	0.841005	0.0851578	0.564768	5.28767	2757.94	12.0269	FALSE	FALSE	FALSE	0.185051896757375
1	75454004	75404004	75504004	224	5	0.3821	189	0.0190083	0.34925	0.503198	0.578139	0.627799	0.67014	0.704964	0.731238	0.405039	-1.34375	0.000810369	0.201247	0.828054	0.118012	0.283944	2.7027	122.422	3.50187	FALSE	FALSE	FALSE	0.185406281176843
1	75554004	75504004	75604004	211	6	0.38528	178	0.0223852	0.30305	0.430374	0.514803	0.583658	0.621975	0.655821	0.686932	0.457627	-0.823378	0.000794113	0.212641	0.771983	0.117567	1.50635	3.60952	215.483	39.9612	FALSE	FALSE	FALSE	0.18544345490969
1	75654004	75604004	75704004	269	9	0.37215	186	0.018751	0.352765	0.434663	0.509965	0.564684	0.615914	0.649478	0.670829	0.457386	-1.18519	0.000769174	0.091836	0.792076	0.112763	0.598264	4.68613	464.475	11.8582	FALSE	FALSE	FALSE	0.1855453893035
1	75754004	75704004	75804004	341	7	0.35492	199	0.0233497	0.354383	0.478216	0.601951	0.658639	0.705708	0.742721	0.771213	0.383881	-0.598531	0.00116649	0.115382	0.821922	0.132458	1.23349	7.76471	159271	229.014	FALSE	FALSE	FALSE	0.185663103456172
1	75854004	75804004	75904004	478	7	0.38606	219	0.0321965	0.646006	0.710749	0.747804	0.782958	0.812358	0.834279	0.84983	0.230859	1.18879	0.00196398	0.079319	0.809666	0.335813	5.09747	5.46862	114703	2151.3	FALSE	FALSE	FALSE	0.185678683912159
1	75954004	75904004	76004004	244	5	0.38396	186	0.0261109	0.561417	0.629631	0.673516	0.708459	0.741297	0.771407	0.791299	0.303282	-0.72317	0.000910235	0.0963186	0.785291	0.183333	1.86029	6.16529	122998	1069.61	FALSE	FALSE	FALSE	0.185764530757795
1	76054004	76004004	76104004	114	5	0.37221	130	0.0164405	0.250482	0.381459	0.503748	0.612725	0.67031	0.717862	0.752976	0.444348	-1.82515	0.000342082	0.14531	0.88608	0.102986	0.284696	6.58621	31904.4	2.18341	FALSE	FALSE	FALSE	0.185812027978096
1	76154004	76104004	76204004	90	7	0.3693	85	0.0109015	0.242285	0.382462	0.511076	0.614599	0.68387	0.744612	0.7907	0.432913	-2.02805	0.000270209	0.133544	0.908945	0.104245	0.108339	6.53333	4404.36	7.61199	FALSE	FALSE	FALSE	0.185824499124287
1	76254004	76204004	76304004	173	6	0.36535	182	0.0199949	0.267648	0.401411	0.527927	0.599183	0.658185	0.709032	0.751375	0.440748	-1.68013	0.000522902	0.144211	0.880443	0.1029	0.508695	3.80233	300.89	1.55712	FALSE	FALSE	FALSE	0.185853608308608
1	76354004	76304004	76404004	229	6	0.38446	171	0.0263931	0.644721	0.715138	0.771091	0.820726	0.845931	0.872294	0.891056	0.205577	-0.559908	0.000950339	0.190721	0.910257	0.274013	1.0272	5.78761	5120.49	42.3706	FALSE	FALSE	FALSE	0.185978140194668
1	76454004	76404004	76504004	219	5	0.35573	190	0.0221992	0.418324	0.554008	0.647936	0.698509	0.745097	0.76924	0.79032	0.339509	-1.16556	0.000750811	0.219171	0.842168	0.210551	0.673475	7.1	65660.6	97.9166	FALSE	FALSE	FALSE	0.186054566293182
1	76554004	76504004	76604004	134	6	0.39912	191	0.025345	0.198836	0.361908	0.500808	0.617627	0.714561	0.766986	0.798908	0.434338	-1.73663	0.000410675	0.180135	0.853866	0.119432	0.183323	5.35714	3530.52	2.88535	FALSE	FALSE	FALSE	0.186183118524606
1	76654004	76604004	76704004	148	6	0.35744	212	0.0254972	0.2039	0.349186	0.466618	0.593956	0.702994	0.797196	0.810333	0.439402	-1.60966	0.000434424	0.156347	0.858113	0.110755	0.352794	5.7	9570.62	12.2523	FALSE	FALSE	FALSE	0.186237544686503
1	76754004	76704004	76804004	131	3	0.41569	113	0.014307	0.187873	0.365399	0.525213	0.6563	0.752257	0.818572	0.840998	0.407627	-1.81526	0.000500255	0.179701	0.917286	0.133481	0.357687	7.90909	185641	133.589	FALSE	FALSE	FALSE	0.186384396244479
1	76854004	76804004	76904004	225	9	0.364	137	0.0122152	0.353508	0.529708	0.65284	0.699819	0.743758	0.780068	0.815865	0.346348	-1.59729	0.00056868	0.157535	0.889446	0.217999	0.599911	6.5913	71450.6	393.82	FALSE	FALSE	FALSE	0.18638886674597
1	76954004	76904004	77004004	319	4	0.40544	286	0.0282132	0.436406	0.507729	0.57042	0.627418	0.671165	0.697093	0.718755	0.395859	-0.9622	0.00104433	0.195775	0.690434	0.128205	0.775104	5.6519	37870.4	76.4904	FALSE	FALSE	FALSE	0.186407696701343
1	77054004	77004004	77104004	245	6	0.36313	230	0.0198948	0.294287	0.465534	0.538514	0.583495	0.617032	0.639254	0.666101	0.45654	-0.547643	0.000882103	0.15068	0.6729	0.11417	0.96709	5.25203	1588.89	33.9817	FALSE	FALSE	FALSE	0.186421555934589
1	77154004	77104004	77204004	236	7	0.39243	182	0.018175	0.242162	0.39522	0.500042	0.592338	0.667594	0.723273	0.752153	0.446746	-1.6153	0.000739299	0.117963	0.858324	0.104052	0.798454	5.58974	26565.3	8.40381	FALSE	FALSE	FALSE	0.186515430568631
1	77254004	77204004	77304004	236	5	0.35655	177	0.0187613	0.573748	0.635612	0.693466	0.735999	0.769904	0.801326	0.817875	0.281724	-0.472756	0.000979346	0.137132	0.767191	0.24202	1.41453	4.30833	9031.23	743.946	FALSE	FALSE	FALSE	0.186576243165838
1	77354004	77304004	77404004	206	6	0.38959	208	0.025951	0.444207	0.562341	0.663671	0.713537	0.753851	0.782998	0.807674	0.324532	-0.739917	0.000860981	0.067445	0.770317	0.16978	0.810408	4.8835	1248.28	31.375	FALSE	FALSE	FALSE	0.186672515554466
1	77454004	77404004	77504004	240	8	0.36919	207	0.0265199	0.391616	0.493676	0.563601	0.60578	0.634464	0.661345	0.687138	0.423197	-0.39533	0.000946349	0.135704	0.668655	0.146082	7.48624	4.05882	23714.8	510.979	FALSE	FALSE	FALSE	0.186723107231561
1	77554004	77504004	77604004	381	9	0.37351	217	0.0259991	0.689421	0.728649	0.76207	0.78644	0.808336	0.822567	0.836775	0.223677	0.867196	0.00169929	0.0947873	0.741363	0.364797	9.3664	4.57068	52013.9	3161.49	FALSE	FALSE	TRUE	0.186772062992716
1	77654004	77604004	77704004	80	7	0.35976	144	0.0274371	0.392868	0.584404	0.713976	0.760272	0.791998	0.823675	0.841258	0.298793	-1.62231	0.000427432	0.244827	0.815265	0.179425	0.558232	5.4359	56907.6	36.7964	FALSE	FALSE	FALSE	0.186820389953751
1	77754004	77704004	77804004	320	4	0.35254	221	0.0213836	0.520584	0.69763	0.755482	0.795595	0.829007	0.856649	0.881964	0.237584	0.0670038	0.00127386	0.357036	0.895647	0.248544	0.81531	7.18634	54088	68.5533	FALSE	FALSE	FALSE	0.186838040447015
1	77854004	77804004	77904004	212	4	0.36243	148	0.0134983	0.389188	0.500371	0.605653	0.662038	0.712307	0.740768	0.769206	0.374353	-0.988167	0.000806264	0.222467	0.855943	0.156553	0.344642	7.48077	61962.4	10.9204	FALSE	FALSE	FALSE	0.18696893328606
1	77954004	77904004	78004004	179	10	0.38017	138	0.0124381	0.354718	0.470822	0.543824	0.610178	0.65547	0.700443	0.736825	0.418246	-1.2506	0.000691132	0.216381	0.853756	0.151526	0.733613	6.08791	5303.37	26.621	FALSE	FALSE	FALSE	0.186980304348902
1	78054004	78004004	78104004	170	7	0.36421	170	0.0167592	0.22147	0.367792	0.449181	0.509347	0.561703	0.613477	0.651118	0.517987	-1.29427	0.000606553	0.144488	0.782804	0.102775	0.529541	3.79518	261.2	14.4708	FALSE	FALSE	FALSE	0.186987599107255
1	78154004	78104004	78204004	173	4	0.38775	150	0.0145781	0.302609	0.506552	0.582028	0.65353	0.713781	0.767506	0.791273	0.383246	-1.73571	0.0006401	0.136475	0.889765	0.134877	0.500358	5.92222	12464.1	71.6844	FALSE	FALSE	FALSE	0.187071995429449
1	78254004	78204004	78304004	195	6	0.37813	134	0.0158684	0.283504	0.528097	0.589792	0.636304	0.684511	0.721698	0.752068	0.400575	-1.423	0.000628413	0.177538	0.84047	0.13153	1.15917	7.25263	103166	110.52	FALSE	FALSE	FALSE	0.187115091187812
1	78354004	78304004	78404004	155	7	0.39631	147	0.0137147	0.255331	0.376702	0.493215	0.594669	0.682781	0.733982	0.768937	0.442055	-2.03085	0.000511862	0.136568	0.914242	0.100722	0.28646	6.79487	25785.7	6.14433	FALSE	FALSE	FALSE	0.187194619206535
1	78454004	78404004	78504004	193	5	0.36718	193	0.0214097	0.371239	0.4768	0.560503	0.630655	0.682439	0.736639	0.776376	0.39505	-1.42656	0.000630775	0.172524	0.89751	0.120346	0.570933	6.48485	1296.14	5.22755	FALSE	FALSE	FALSE	0.187220358101005
1	78554004	78504004	78604004	146	9	0.37724	161	0.020031	0.302934	0.416137	0.51425	0.577147	0.624116	0.669369	0.713371	0.454668	-1.23582	0.000656848	0.176068	0.8191	0.10456	0.647938	2.95775	141.416	3.41427	FALSE	FALSE	FALSE	0.187291967647607
1	78654004	78604004	78704004	173	7	0.36661	189	0.0194496	0.25526	0.368932	0.466364	0.542049	0.587846	0.631539	0.676285	0.495961	-1.14492	0.000557778	0.171173	0.75169	0.100565	0.26778	5.01124	10064.3	4.04134	FALSE	FALSE	FALSE	0.187373995064373
1	78754004	78704004	78804004	233	5	0.37802	157	0.0216212	0.48487	0.598951	0.678664	0.724297	0.765844	0.799647	0.826668	0.303009	-0.749188	0.000837784	0.198488	0.855654	0.195934	0.555808	7.23478	37497.5	78.941	FALSE	FALSE	FALSE	0.187384751578929
1	78854004	78804004	78904004	189	9	0.37146	178	0.0220292	0.472149	0.58047	0.644729	0.705989	0.749385	0.783059	0.810035	0.322026	-1.24221	0.000667431	0.211969	0.866148	0.168391	0.346014	7.77419	83714.1	20.2956	FALSE	FALSE	FALSE	0.187485594991411
1	78954004	78904004	79004004	278	3	0.38872	199	0.0248858	0.382692	0.555878	0.638773	0.717878	0.776244	0.806609	0.82606	0.327981	-0.736972	0.0010022	0.188115	0.834811	0.198792	0.567597	7	84867.3	148.844	FALSE	FALSE	FALSE	0.187663827075747
1	79054004	79004004	79104004	171	4	0.34352	138	0.0284306	0.518709	0.611772	0.658538	0.70048	0.739283	0.762453	0.779896	0.31841	-0.827907	0.000549348	0.16476	0.86495	0.239319	1.32834	6.85542	73090.3	177.619	FALSE	FALSE	FALSE	0.187695558246543
1	79154004	79104004	79204004	62	6	0.35088	92	0.0224183	0.281541	0.476803	0.568764	0.648632	0.73264	0.798195	0.827602	0.380832	-1.89746	0.000253617	0.166264	0.851219	0.109744	0.174832	6.34375	50742.7	4.98777	FALSE	FALSE	FALSE	0.187702117735419
1	79254004	79204004	79304004	126	8	0.35823	144	0.0141759	0.199989	0.353141	0.468433	0.56423	0.629656	0.673514	0.711235	0.485686	-1.8721	0.000411401	0.142386	0.855745	0.109213	0.229239	6.28571	85918.5	243.376	FALSE	FALSE	FALSE	0.187847384373248
1	79354004	79304004	79404004	197	6	0.38006	154	0.0113335	0.362454	0.55779	0.646709	0.727645	0.766194	0.789511	0.805293	0.334915	-1.74021	0.00064425	0.19048	0.874117	0.195322	0.218214	6.58586	119888	555.865	FALSE	FALSE	FALSE	0.187852672698906
1	79454004	79404004	79504004	239	6	0.35172	156	0.00965764	0.225288	0.346782	0.452012	0.515806	0.601831	0.664313	0.720163	0.496258	-1.67297	0.000686887	0.163184	0.892128	0.0992416	0.23868	7.9322	193338	115.769	FALSE	FALSE	FALSE	0.187866766188176
1	79554004	79504004	79604004	198	9	0.36647	123	0.010101	0.188104	0.323831	0.442342	0.519108	0.590583	0.629385	0.677355	0.51847	-1.84375	0.000549488	0.167096	0.865582	0.0915738	0.587727	7.51485	114717	76.1918	FALSE	FALSE	FALSE	0.188005843200399
1	79654004	79604004	79704004	247	6	0.37917	151	0.0125022	0.275906	0.402411	0.498338	0.573825	0.643913	0.683612	0.713366	0.458376	-1.54189	0.000703293	0.220817	0.827889	0.109614	0.635466	6.97541	52985.3	35.3106	FALSE	FALSE	FALSE	0.188028269423442
1	79754004	79704004	79804004	136	7	0.35111	129	0.0110988	0.172177	0.307583	0.423349	0.536899	0.631758	0.694826	0.751383	0.497432	-1.82901	0.000409114	0.190572	0.886769	0.0977251	0.472171	4.55714	308.613	2.72086	FALSE	FALSE	FALSE	0.188364239758825
1	79854004	79804004	79904004	118	10	0.37188	124	0.0163629	0.195598	0.37115	0.490884	0.59156	0.649816	0.70283	0.749303	0.464123	-1.84031	0.000397919	0.194467	0.888653	0.0926657	0.146381	5.96552	1774.61	4.04426	FALSE	FALSE	FALSE	0.18842255980974
1	79954004	79904004	80004004	124	7	0.35984	141	0.0175999	0.245856	0.439199	0.596307	0.699022	0.738747	0.773355	0.788917	0.388371	-1.79982	0.000470976	0.243298	0.855593	0.128408	0.373985	3.47619	898.786	5.92361	FALSE	FALSE	FALSE	0.188443775290289
1	80054004	80004004	80104004	108	7	0.35822	116	0.0142092	0.278454	0.452568	0.601326	0.722567	0.758012	0.784082	0.806152	0.370977	-1.70142	0.000424311	0.253725	0.849176	0.149217	0.541305	6.54902	6814.57	11.8308	FALSE	FALSE	FALSE	0.188532595195971
1	80154004	80104004	80204004	69	4	0.38837	112	0.0175007	0.336888	0.506878	0.625787	0.71039	0.765002	0.793375	0.815323	0.34948	-1.79778	0.000256734	0.224973	0.894266	0.125447	0.362758	2.28571	185.032	0.990968	FALSE	FALSE	FALSE	0.188545674765787
1	80254004	80204004	80304004	160	8	0.34818	178	0.0194182	0.32598	0.49218	0.600679	0.696854	0.740314	0.760146	0.77599	0.372551	-1.66094	0.000529524	0.215523	0.864432	0.116924	0.511839	4.88889	688.798	14.3672	FALSE	FALSE	FALSE	0.188549829136228
1	80354004	80304004	80404004	128	8	0.37886	128	0.0124803	0.310085	0.49701	0.607452	0.674065	0.729791	0.748703	0.780191	0.378958	-1.69933	0.000483304	0.238831	0.843382	0.126695	0.947024	3.95312	497.053	6.31077	FALSE	FALSE	FALSE	0.188551846097862
1	80454004	80404004	80504004	83	10	0.37047	116	0.0147761	0.374776	0.513953	0.610544	0.648138	0.68285	0.716721	0.7403	0.387531	-1.92609	0.000341732	0.256444	0.870854	0.122412	0.214506	3.66667	248.585	0.856483	FALSE	FALSE	FALSE	0.188564103015137
1	80554004	80504004	80604004	128	7	0.37871	151	0.0124803	0.317719	0.47261	0.571739	0.629361	0.68117	0.727365	0.762136	0.405414	-1.43675	0.000395147	0.254876	0.836535	0.149267	0.306475	6.67188	61817.2	189.776	FALSE	FALSE	FALSE	0.188633809898368
1	80654004	80604004	80704004	52	2	0.40144	55	0.0114901	0.387603	0.551461	0.675276	0.776389	0.808672	0.83189	0.855872	0.301834	-0.921878	0.000449727	0.205734	0.918302	0.191236	0.191801	7.32143	43482.4	39.9784	FALSE	FALSE	FALSE	0.188719386221458
1	80754004	80704004	80804004	71	2	0.38366	123	0.0282576	0.305793	0.524577	0.707168	0.790189	0.81111	0.825924	0.839886	0.313622	-1.20166	0.000272667	0.201416	0.820265	0.170836	0.389184	6.66667	176152	120.932	FALSE	FALSE	FALSE	0.188730379122904
1	80854004	80804004	80904004	217	4	0.38509	204	0.0175637	0.326994	0.456869	0.574906	0.660867	0.726109	0.756088	0.785567	0.387514	-1.55003	0.000657219	0.210012	0.840798	0.177375	0.570393	7.0283	74749.5	105.492	FALSE	FALSE	FALSE	0.188752409195017
1	80954004	80904004	81004004	175	1	0.40898	197	0.0269542	0.292421	0.45039	0.583374	0.678447	0.756684	0.800414	0.828374	0.372842	-1.19074	0.000562427	0.226941	0.881112	0.148736	0.877068	5.53333	6180.61	3.85171	FALSE	FALSE	FALSE	0.188794826280101
1	81054004	81004004	81104004	247	6	0.39135	192	0.0128587	0.332177	0.474543	0.59072	0.688443	0.748815	0.797491	0.831965	0.362263	-1.3186	0.000692271	0.220104	0.908905	0.173082	0.832155	6.10569	10714.1	9.28542	FALSE	FALSE	FALSE	0.188912125302153
1	81154004	81104004	81204004	158	5	0.37465	118	0.0105485	0.312079	0.443322	0.556146	0.655752	0.726911	0.800431	0.85298	0.378911	-1.21426	0.000490772	0.25407	0.903575	0.145868	0.559925	7.1875	187382	933.64	FALSE	FALSE	FALSE	0.18894826332598
1	81254004	81204004	81304004	423	9	0.36949	152	0.00881693	0.514119	0.666895	0.746943	0.7838	0.812746	0.842681	0.867918	0.252128	-0.895848	0.00094359	0.195408	0.86088	0.296262	1.30034	4.30806	153098	6967.6	FALSE	FALSE	FALSE	0.188996384434494
1	81354004	81304004	81404004	222	8	0.37197	106	0.00878237	0.428423	0.547362	0.651064	0.73941	0.793691	0.828399	0.858546	0.307586	-1.3495	0.000604495	0.198148	0.938898	0.25146	0.25679	6.03604	199999	3171.29	FALSE	FALSE	FALSE	0.189032684303781
1	81454004	81404004	81504004	96	5	0.37938	79	0.00832023	0.242528	0.426013	0.572118	0.650979	0.719276	0.780226	0.818305	0.398651	-1.52528	0.000315997	0.225469	0.916434	0.131569	0.340848	7.64	74522	36.5338	FALSE	FALSE	FALSE	0.189038438340067
1	81554004	81504004	81604004	163	4	0.37948	137	0.0109195	0.288424	0.414672	0.498081	0.577759	0.64004	0.691985	0.736724	0.450331	-1.34793	0.000435011	0.191423	0.911726	0.113404	0.352711	8.17949	134895	39.9023	FALSE	FALSE	FALSE	0.18929033398269
1	81654004	81604004	81704004	349	5	0.38897	161	0.00783911	0.454818	0.563789	0.630203	0.690481	0.74456	0.777979	0.822509	0.330809	-1.19233	0.00101345	0.243623	0.946095	0.171599	0.558585	8.375	199999	135.295	FALSE	FALSE	FALSE	0.189295527962047
1	81754004	81704004	81804004	295	8	0.35962	197	0.0130263	0.234046	0.387445	0.471264	0.54386	0.595578	0.640773	0.669265	0.493967	-1.1608	0.000893151	0.231951	0.725907	0.119638	0.935455	7.04698	154150	446.381	FALSE	FALSE	FALSE	0.189306712529268
1	81854004	81804004	81904004	147	4	0.35863	209	0.019253	0.303057	0.453457	0.561639	0.631444	0.691673	0.717194	0.739733	0.414543	-1.78773	0.000490063	0.218476	0.808159	0.105666	0.421287	7.34247	181806	229.707	FALSE	FALSE	FALSE	0.189397883600652
1	81954004	81904004	82004004	306	9	0.37103	203	0.0195873	0.386307	0.546873	0.646601	0.696123	0.734918	0.770032	0.793959	0.346455	-0.831331	0.000976335	0.158381	0.826432	0.189858	3.0722	6.875	98790.2	143.763	FALSE	FALSE	FALSE	0.189436982214085
1	82054004	82004004	82104004	315	4	0.38265	178	0.0132175	0.380505	0.499369	0.60246	0.688473	0.735048	0.757909	0.820365	0.35941	-0.942373	0.00102754	0.167982	0.781412	0.175754	0.589568	7.01266	199999	584.794	FALSE	FALSE	FALSE	0.189495999600716
1	82154004	82104004	82204004	353	6	0.39899	173	0.0106722	0.295754	0.513155	0.626181	0.707538	0.780516	0.812514	0.834085	0.34718	-1.08799	0.00105356	0.171186	0.798434	0.180904	0.547363	7	199999	1236.8	FALSE	FALSE	FALSE	0.189532672014556
1	82254004	82204004	82304004	252	6	0.36374	167	0.0134771	0.412886	0.567756	0.667436	0.752452	0.791769	0.827516	0.852245	0.303991	-0.595905	0.000869852	0.21267	0.857698	0.174746	0.807003	6.81746	166468	595.724	FALSE	FALSE	FALSE	0.189564670559089
1	82354004	82304004	82404004	189	9	0.36569	115	0.0133107	0.478896	0.668611	0.754396	0.80327	0.832998	0.861144	0.879013	0.245953	-0.961431	0.000752162	0.230759	0.919033	0.210733	1.00613	7.37895	94665	104.423	FALSE	FALSE	FALSE	0.18957219974912
1	82454004	82404004	82504004	211	6	0.35655	177	0.0145459	0.262936	0.442944	0.516662	0.583175	0.635134	0.671198	0.694557	0.456199	-1.57849	0.000662987	0.170609	0.747927	0.117565	0.303101	6.9434	135329	189.769	FALSE	FALSE	FALSE	0.189629419761855
1	82554004	82504004	82604004	365	11	0.36389	199	0.0175239	0.363573	0.461115	0.554543	0.601018	0.639562	0.671507	0.70434	0.429192	-0.194732	0.00139417	0.191634	0.626846	0.121016	5.09577	6.33333	158451	776.042	FALSE	FALSE	FALSE	0.189668693518025
1	82654004	82604004	82704004	287	13	0.38794	197	0.0172025	0.35343	0.54146	0.627105	0.688884	0.739839	0.768415	0.787496	0.356196	-0.619268	0.00113274	0.162384	0.817966	0.173526	6.16818	6.0473	124450	600.473	FALSE	FALSE	FALSE	0.189730818176679
1	82754004	82704004	82804004	205	6	0.3792	177	0.019052	0.388755	0.558922	0.647179	0.705371	0.742103	0.771638	0.793477	0.341794	-0.80481	0.000790208	0.302224	0.863442	0.177891	1.31682	6.54455	60578.7	78.8088	FALSE	FALSE	FALSE	0.189761455633154
1	82854004	82804004	82904004	265	2	0.38916	244	0.032918	0.624437	0.711343	0.757511	0.799271	0.822755	0.847357	0.8661	0.224461	-0.663239	0.00116044	0.302045	0.846661	0.258107	0.949367	6.68182	40939.3	47.0324	FALSE	FALSE	FALSE	0.18985255788001
1	82954004	82904004	83004004	221	8	0.38891	140	0.0202908	0.554406	0.655425	0.728796	0.800148	0.849119	0.873907	0.888972	0.235604	-1.22043	0.000914931	0.307636	0.934916	0.224715	0.634437	7.89091	153371	85.706	FALSE	FALSE	FALSE	0.19002934827738
1	83054004	83004004	83104004	141	5	0.3968	144	0.0147643	0.345446	0.516557	0.646769	0.766255	0.791304	0.805921	0.819159	0.329798	-1.82474	0.00054338	0.23536	0.901597	0.140349	0.173988	6.82609	58745.7	15.5064	FALSE	FALSE	FALSE	0.19028386646264
1	83154004	83104004	83204004	124	7	0.37104	124	0.0102962	0.233639	0.398018	0.498662	0.573191	0.629345	0.685123	0.714417	0.466801	-1.92063	0.000415437	0.181965	0.874153	0.091468	0.169856	5.84615	1346.92	7.31204	FALSE	FALSE	FALSE	0.190308913338312
1	83254004	83204004	83304004	188	3	0.3737	138	0.0160244	0.305848	0.484957	0.629995	0.679944	0.726471	0.769962	0.812771	0.370007	-1.80475	0.000620946	0.183587	0.886448	0.111905	0.497142	6.97872	14680.7	3.91069	FALSE	FALSE	FALSE	0.190422584661742
1	83354004	83304004	83404004	146	10	0.38399	126	0.014474	0.310408	0.505474	0.60795	0.669074	0.713251	0.749972	0.776275	0.381085	-1.7555	0.000511574	0.182494	0.892934	0.117899	0.364085	7	33875.3	5.93491	FALSE	FALSE	FALSE	0.190452821770976
1	83454004	83404004	83504004	133	8	0.37827	188	0.0196718	0.246104	0.399501	0.537132	0.620759	0.698175	0.735311	0.762562	0.428636	-1.81699	0.000479136	0.196372	0.82386	0.102168	0.335562	6.36364	106484	64.1354	FALSE	FALSE	FALSE	0.190455827781728
1	83554004	83504004	83604004	369	13	0.36698	197	0.015442	0.481685	0.577248	0.640511	0.687703	0.722483	0.753929	0.766486	0.338565	-0.447882	0.00114283	0.143078	0.714089	0.247411	2.4178	4.32432	77423.1	2931.65	FALSE	FALSE	FALSE	0.190603772249127
1	83654004	83604004	83704004	412	11	0.36692	225	0.0268364	0.419881	0.625658	0.720589	0.749127	0.774479	0.792923	0.807307	0.301434	0.27443	0.00165981	0.263666	0.682121	0.200955	12.9568	4.47059	56566	2747.81	FALSE	FALSE	FALSE	0.190739605491473
1	83754004	83704004	83804004	138	8	0.36258	178	0.0179564	0.283285	0.40687	0.495655	0.550078	0.606177	0.657297	0.695292	0.472192	-1.69506	0.000500313	0.219908	0.798701	0.101844	0.449363	6.80882	199999	702.46	FALSE	FALSE	FALSE	0.19078229519511
1	83854004	83804004	83904004	606	5	0.36233	215	0.0279283	0.767633	0.808234	0.836066	0.856064	0.867315	0.876542	0.884333	0.157687	1.30357	0.00239567	0.139683	0.884822	0.501042	11.5955	3.21311	31530.2	8226.71	FALSE	FALSE	FALSE	0.190851443406613
1	83954004	83904004	84004004	195	8	0.36487	139	0.0152234	0.2745	0.421625	0.555799	0.633	0.693687	0.73653	0.770144	0.416388	-1.37277	0.000588616	0.181401	0.859003	0.122105	0.224964	7.2449	111416	435.93	FALSE	FALSE	FALSE	0.190957363826333
1	84054004	84004004	84104004	199	4	0.37546	147	0.0155178	0.252963	0.453684	0.585473	0.675995	0.743058	0.792606	0.826825	0.381342	-1.48192	0.0006029	0.188719	0.933916	0.133186	0.168224	8.39	132687	16.9145	FALSE	FALSE	FALSE	0.191024455183657
1	84154004	84104004	84204004	132	1	0.39341	155	0.0193444	0.23771	0.43208	0.544028	0.62867	0.703112	0.767959	0.808731	0.411101	-1.56631	0.000462325	0.166356	0.865162	0.108819	0.207514	5.8806	13390.8	7.39013	FALSE	FALSE	FALSE	0.191041316377537
1	84254004	84204004	84304004	112	9	0.37237	123	0.0157794	0.23767	0.400323	0.503551	0.594797	0.653226	0.706314	0.742784	0.451619	-1.90218	0.000433628	0.153409	0.855618	0.10491	0.10573	5.49057	2715.82	16.5494	FALSE	FALSE	FALSE	0.191065913965326
1	84354004	84304004	84404004	155	7	0.37928	128	0.0134713	0.346699	0.467506	0.57247	0.655633	0.730929	0.764819	0.787479	0.382067	-1.73548	0.000451823	0.162685	0.909691	0.122676	0.271526	6.39744	2718.23	9.64702	FALSE	FALSE	FALSE	0.191185029594592
1	84454004	84404004	84504004	97	10	0.38326	144	0.016015	0.216131	0.373347	0.455395	0.526841	0.580673	0.644553	0.676613	0.503778	-1.96142	0.000369099	0.169842	0.83116	0.0818904	0.383496	3.82	381.983	2.8219	FALSE	FALSE	FALSE	0.191209049329228
1	84554004	84504004	84604004	195	8	0.36162	189	0.0162554	0.269411	0.40509	0.504917	0.570487	0.632808	0.680841	0.711264	0.46074	-1.5383	0.000618802	0.216284	0.86135	0.107756	0.258841	7.15306	174742	364.322	FALSE	FALSE	FALSE	0.191217616769801
1	84654004	84604004	84704004	525	8	0.35956	197	0.0152261	0.617416	0.682028	0.73821	0.772619	0.805479	0.823766	0.841116	0.245624	0.353263	0.00187599	0.358843	0.810944	0.294524	8.72669	4.21154	43561.5	3949.13	FALSE	FALSE	FALSE	0.191422018098738
1	84754004	84704004	84804004	169	13	0.37178	147	0.0115366	0.282233	0.463236	0.52971	0.589701	0.624466	0.658422	0.688812	0.451917	-1.21429	0.00055289	0.264421	0.782566	0.101541	0.394621	7.49425	115885	73.1674	FALSE	FALSE	FALSE	0.191443515398822
1	84854004	84804004	84904004	218	7	0.38529	189	0.0162137	0.286337	0.503065	0.569023	0.627762	0.673488	0.70324	0.728306	0.41554	-1.30318	0.000652184	0.207278	0.791143	0.12281	0.466542	5.58716	4842.9	56.3566	FALSE	FALSE	FALSE	0.191484820784472
1	84954004	84904004	85004004	162	13	0.37945	153	0.0128892	0.316502	0.409408	0.49938	0.56133	0.622874	0.664141	0.693879	0.461784	-1.2058	0.000599313	0.293388	0.777849	0.112225	1.64403	3.45	270.235	18.5721	FALSE	FALSE	FALSE	0.191617933153822
1	85054004	85004004	85104004	162	9	0.36893	157	0.012928	0.389058	0.626666	0.691975	0.74117	0.771186	0.794944	0.814543	0.310065	-0.860289	0.000633616	0.3263	0.859973	0.188284	0.666059	5.31707	4994.19	76.0222	FALSE	FALSE	FALSE	0.191651938059735
1	85154004	85104004	85204004	190	11	0.36885	178	0.0191658	0.277776	0.445218	0.535851	0.609403	0.665488	0.702713	0.735538	0.432573	-1.13869	0.00065021	0.256749	0.804205	0.102649	1.17896	6.46875	60266.8	19.972	FALSE	FALSE	FALSE	0.191783306000752
1	85254004	85204004	85304004	173	11	0.34452	167	0.0194496	0.416266	0.527287	0.579956	0.628645	0.668136	0.701487	0.722336	0.393698	-1.0874	0.000611053	0.14011	0.740508	0.16013	0.478708	5.29762	11927.5	30.0017	FALSE	FALSE	FALSE	0.191819381856148
1	85354004	85304004	85404004	198	9	0.35603	166	0.0165809	0.384473	0.489891	0.545387	0.600286	0.652802	0.683349	0.702734	0.420154	-1.30317	0.000657658	0.178173	0.817631	0.167395	0.349599	5.74257	23852.2	71.8151	FALSE	FALSE	FALSE	0.191833005046599
1	85454004	85404004	85504004	63	5	0.37413	113	0.0160727	0.345003	0.554084	0.636324	0.687314	0.732283	0.769351	0.792986	0.354665	-1.49004	0.000271021	0.308106	0.758764	0.203724	0.355205	5.45455	19270.5	16.9385	FALSE	FALSE	FALSE	0.191921468414901
1	85554004	85504004	85604004	109	7	0.36456	176	0.0229646	0.40194	0.557963	0.66342	0.724786	0.757739	0.78934	0.812343	0.327496	-1.69712	0.000484185	0.215094	0.803904	0.134439	0.343587	1.90196	68.7963	2.45774	FALSE	FALSE	FALSE	0.192004533067981
1	85654004	85604004	85704004	72	6	0.38288	104	0.0104822	0.41784	0.553552	0.653548	0.714018	0.757148	0.78898	0.806631	0.329755	-2.04155	0.000418266	0.222975	0.89649	0.149614	0.217322	3.18919	406.328	2.80722	FALSE	FALSE	FALSE	0.192185699407695
1	85754004	85704004	85804004	104	10	0.35537	134	0.0148162	0.415881	0.565768	0.62654	0.680697	0.724416	0.760652	0.785732	0.348616	-1.93827	0.000426767	0.262469	0.877644	0.168056	0.394427	5.55769	2191.21	13.9988	FALSE	FALSE	FALSE	0.192460475671283
1	85854004	85804004	85904004	84	5	0.37026	153	0.0166217	0.309109	0.446688	0.529466	0.588387	0.631894	0.670567	0.702343	0.445935	-1.82243	0.000313919	0.187972	0.858631	0.096729	0.0752124	3.60976	5360.46	2.77236	FALSE	FALSE	FALSE	0.192674503544723
1	85954004	85904004	86004004	127	4	0.37818	126	0.0112415	0.309993	0.493342	0.60106	0.671995	0.738907	0.799755	0.847614	0.362476	-1.60159	0.000366412	0.165248	0.899572	0.212431	0.244698	6.66154	187773	592.967	FALSE	FALSE	FALSE	0.192711784166613
1	86054004	86004004	86104004	327	8	0.34544	179	0.0135595	0.489783	0.621913	0.724717	0.78549	0.823692	0.852728	0.875029	0.260949	-1.04992	0.000935332	0.248198	0.915171	0.278011	0.686566	6.04321	199999	1642.01	FALSE	FALSE	FALSE	0.192752149387855
1	86154004	86104004	86204004	211	7	0.36898	195	0.0178247	0.477433	0.608977	0.731591	0.770928	0.808115	0.824148	0.843323	0.276498	-0.552432	0.000924402	0.372657	0.7596	0.21124	1.49514	7.20755	177436	195.32	FALSE	FALSE	FALSE	0.192832175887491
1	86254004	86204004	86304004	184	5	0.36626	191	0.0192097	0.561204	0.651689	0.718988	0.759744	0.792308	0.823291	0.83501	0.265395	-1.51732	0.000852916	0.393777	0.824297	0.210385	1.58262	6.90217	40756.7	59.6667	FALSE	FALSE	FALSE	0.192870957972478
1	86354004	86304004	86404004	122	4	0.35286	129	0.0127333	0.311727	0.509523	0.640446	0.713896	0.760433	0.786873	0.809714	0.352484	-1.71832	0.000476589	0.242356	0.846775	0.160272	0.386515	6.91935	162111	463.62	FALSE	FALSE	FALSE	0.192893225850935
1	86454004	86404004	86504004	371	8	0.36748	168	0.0125108	0.450525	0.635555	0.724647	0.759409	0.783448	0.803936	0.829505	0.287568	-0.530012	0.0011976	0.275059	0.828402	0.31976	2.49019	3.87568	92847	6965.97	FALSE	FALSE	FALSE	0.193050542388166
1	86554004	86504004	86604004	134	6	0.35966	158	0.0187271	0.687976	0.747745	0.796869	0.821636	0.840989	0.856437	0.875643	0.196101	-1.1684	0.000622907	0.442229	0.89712	0.286464	0.671933	5.94118	156167	1192.14	FALSE	FALSE	FALSE	0.193084187704494
1	86654004	86604004	86704004	166	13	0.36834	163	0.0210654	0.421653	0.618522	0.67185	0.716457	0.737879	0.756447	0.771051	0.329449	-1.45268	0.000715103	0.252031	0.756871	0.17945	9.69878	4.04878	4418.41	451.995	FALSE	FALSE	FALSE	0.193153973247168
1	86754004	86704004	86804004	91	10	0.35953	124	0.0179003	0.423568	0.537754	0.610642	0.660316	0.703429	0.735178	0.76508	0.36629	-1.71548	0.000425685	0.270262	0.807984	0.129433	0.503387	7.88636	70360.3	9.04242	FALSE	FALSE	FALSE	0.193237956037323
1	86854004	86804004	86904004	53	5	0.39544	70	0.00818797	0.473793	0.640024	0.700022	0.752213	0.783818	0.81874	0.830712	0.285811	-1.92824	0.000267478	0.334644	0.944717	0.185742	0.200576	5.64286	2658.42	5.57637	FALSE	FALSE	FALSE	0.193296105942765
1	86954004	86904004	87004004	88	16	0.35572	124	0.0147942	0.488205	0.678636	0.71802	0.743406	0.765493	0.782189	0.795621	0.289776	-1.89711	0.000392923	0.288356	0.794228	0.16073	0.367288	3.76087	992.211	10.0894	FALSE	FALSE	FALSE	0.193414019571828
1	87054004	87004004	87104004	73	12	0.35964	137	0.0190402	0.405078	0.55546	0.63469	0.681768	0.70655	0.729072	0.748981	0.362629	-2.03452	0.000319511	0.225106	0.750915	0.107864	0.0631044	2.74286	100.187	1.99355	FALSE	FALSE	FALSE	0.193634476501642
1	87154004	87104004	87204004	195	5	0.36833	247	0.0235446	0.349767	0.501676	0.619487	0.666911	0.705564	0.735556	0.760904	0.380019	-1.38189	0.000858489	0.263374	0.746651	0.138007	0.452084	3.67708	298.046	6.32595	FALSE	FALSE	FALSE	0.193678640172648
1	87254004	87204004	87304004	280	13	0.37353	195	0.0239218	0.686311	0.751757	0.798489	0.836748	0.861134	0.885135	0.902382	0.182578	0.27385	0.00125547	0.0578859	0.849793	0.376712	3.44178	4.70714	35742.9	1519.43	FALSE	FALSE	FALSE	0.193769673613726
1	87354004	87304004	87404004	101	9	0.36598	90	0.00990099	0.381857	0.554892	0.671255	0.748515	0.786028	0.818616	0.849353	0.312783	-1.52048	0.00039056	0.20905	0.860527	0.159668	0.216001	7.59615	94969.1	81.4619	FALSE	FALSE	FALSE	0.193933468383486
1	87454004	87404004	87504004	113	6	0.35586	139	0.0158068	0.188032	0.326371	0.432962	0.531808	0.611876	0.657966	0.697196	0.507684	-1.63725	0.000370425	0.148315	0.79257	0.100118	0.125268	4.49123	545.679	4.82204	FALSE	FALSE	FALSE	0.193975026647454
1	87554004	87504004	87604004	158	8	0.36973	193	0.0163602	0.23464	0.372598	0.491424	0.580442	0.637575	0.676825	0.709172	0.471046	-1.47685	0.000530459	0.185192	0.792544	0.0982647	0.452557	3.57692	221.522	1.95442	FALSE	FALSE	FALSE	0.193976371778075
1	87654004	87604004	87704004	215	10	0.36675	192	0.0201843	0.461435	0.588203	0.650046	0.709553	0.750594	0.785047	0.821965	0.319022	-1.35718	0.000729139	0.122693	0.854056	0.159276	0.415718	4.43519	774.48	14.369	FALSE	FALSE	FALSE	0.19405381893029
1	87754004	87704004	87804004	266	10	0.37043	248	0.0440252	0.427439	0.521387	0.571074	0.612381	0.65016	0.683606	0.701656	0.404614	-0.504777	0.00101157	0.165176	0.711533	0.143925	2.34784	4.37121	50487.4	429.166	FALSE	FALSE	FALSE	0.194054922631001
1	87854004	87804004	87904004	464	10	0.34129	249	0.0266889	0.726969	0.776608	0.823628	0.839981	0.855302	0.867997	0.877638	0.175982	1.32335	0.00207582	0.276051	0.807837	0.426954	14.8581	2.94872	45061	9434.28	FALSE	FALSE	FALSE	0.194259289129073
1	87954004	87904004	88004004	137	5	0.36055	176	0.0204288	0.456676	0.585442	0.681342	0.736972	0.771786	0.797723	0.822969	0.306727	-1.49104	0.000485012	0.198113	0.862127	0.134686	1.28078	4.80597	111201	1290.33	FALSE	FALSE	TRUE	0.194260665987854
1	88054004	88004004	88104004	78	2	0.39134	79	0.0103209	0.321511	0.553649	0.663114	0.750281	0.787296	0.829262	0.857164	0.319675	-1.85179	0.000286603	0.192723	0.950024	0.13523	0.14247	4.34146	1257.15	3.8593	FALSE	FALSE	FALSE	0.194280790003844
1	88154004	88104004	88204004	136	5	0.39648	145	0.0136885	0.334953	0.517824	0.62645	0.722954	0.77104	0.796992	0.834963	0.342118	-1.66967	0.000398919	0.187498	0.918895	0.136335	0.16217	2.89062	175.439	1.23818	TRUE	FALSE	FALSE	0.194305673377173
1	88254004	88204004	88304004	75	13	0.35716	109	0.0146751	0.375863	0.516636	0.593689	0.658452	0.718597	0.765304	0.79726	0.367743	-1.9921	0.000300939	0.191773	0.915017	0.1254	0.059835	3.84211	643.972	2.99023	FALSE	FALSE	FALSE	0.194381443151122
1	88354004	88304004	88404004	146	8	0.35167	163	0.016154	0.300504	0.448629	0.57171	0.663587	0.728158	0.755105	0.777591	0.393531	-1.31183	0.00051812	0.230613	0.833458	0.136095	0.340155	2.98667	259.989	4.76963	FALSE	FALSE	FALSE	0.194484142215745
1	88454004	88404004	88504004	132	8	0.36627	139	0.0124833	0.372283	0.53106	0.67049	0.736056	0.777988	0.807978	0.827489	0.325237	-1.525	0.000539213	0.199964	0.877177	0.14143	0.37687	5.95522	9116.05	17.0785	FALSE	FALSE	FALSE	0.194511920916065
1	88554004	88504004	88604004	86	7	0.37089	133	0.0130905	0.299494	0.512239	0.632854	0.692449	0.732841	0.759782	0.783457	0.369555	-1.77609	0.000362105	0.220331	0.841844	0.156982	0.609596	6.65116	20446.9	7.67281	FALSE	FALSE	FALSE	0.194513758145642
1	88654004	88604004	88704004	140	5	0.34964	171	0.0165319	0.32939	0.569612	0.657973	0.697634	0.727876	0.751181	0.772707	0.356233	-1.37435	0.000570489	0.304721	0.799731	0.164519	0.482672	6.39706	99116.9	199.684	FALSE	FALSE	FALSE	0.194538564619058
1	88754004	88704004	88804004	269	6	0.37548	169	0.0116668	0.205991	0.399826	0.549396	0.667986	0.708484	0.73659	0.756077	0.425093	-0.461668	0.000736815	0.167136	0.657372	0.162542	0.863406	4.94074	35278.5	1259.64	FALSE	FALSE	FALSE	0.1946068999562
1	88854004	88804004	88904004	127	8	0.37562	177	0.0232259	0.241838	0.448535	0.567498	0.627195	0.68026	0.708047	0.734138	0.427499	-1.34397	0.000486275	0.128516	0.750818	0.113967	0.410105	3.17188	763.172	10.6118	FALSE	FALSE	FALSE	0.194724757994722
1	88954004	88904004	89004004	88	7	0.35594	118	0.0225843	0.240766	0.442155	0.640723	0.695469	0.742056	0.7696	0.789628	0.3828	-1.33376	0.000339961	0.142363	0.814179	0.141159	0.339722	2.57778	99.8231	0.457145	FALSE	FALSE	FALSE	0.195468304587052
1	89054004	89004004	89104004	37	8	0.36425	66	0.0209077	0.483647	0.758286	0.809306	0.855399	0.883917	0.89641	0.915221	0.199688	-1.07916	0.000199729	0.138636	0.895771	0.238117	0.180654	5.66667	301.693	2.46349	FALSE	FALSE	FALSE	0.195506134425997
1	89254004	89204004	89304004	77	12	0.35899	122	0.0238504	0.39188	0.528366	0.601679	0.672559	0.707874	0.738747	0.758624	0.371467	-0.356074	0.000750885	0.203175	0.539317	0.180705	2.00543	1.41026	405.814	215.047	FALSE	FALSE	FALSE	0.195532018546398
1	89354004	89304004	89404004	193	9	0.37122	224	0.0241144	0.360346	0.466078	0.545707	0.632667	0.691932	0.728978	0.75067	0.403375	-0.404772	0.000710293	0.216043	0.726808	0.128252	0.368694	3.58163	2472.45	11.6824	FALSE	FALSE	FALSE	0.195545740227022
1	89454004	89404004	89504004	276	10	0.35867	207	0.0131255	0.225416	0.429854	0.551377	0.634576	0.67852	0.710036	0.739123	0.433014	-1.17859	0.000667649	0.137315	0.776187	0.134126	0.143105	5.74453	30860.6	529.429	FALSE	FALSE	FALSE	0.19557851347764
1	89554004	89504004	89604004	139	10	0.36786	133	0.0168318	0.196745	0.353222	0.441469	0.517264	0.578509	0.631668	0.67031	0.51583	-1.43231	0.000502303	0.149069	0.782776	0.0873198	0.656064	3.37681	243.626	5.88137	FALSE	FALSE	FALSE	0.195593753209945
1	89654004	89604004	89704004	89	4	0.37191	271	0.109816	0.485124	0.608563	0.664719	0.695437	0.718063	0.737674	0.753446	0.333853	0.907712	0.000468844	0.197755	0.716739	0.183039	1.9728	1.22917	316.398	4.38037	FALSE	FALSE	FALSE	0.195615182923037
1	89754004	89704004	89804004	214	9	0.36271	214	0.0266267	0.444102	0.569028	0.661888	0.7471	0.791232	0.823467	0.854488	0.301242	-0.730157	0.000768351	0.19881	0.870153	0.190545	0.982537	5.83654	2704.92	80.702	FALSE	FALSE	FALSE	0.195714429084877
1	89854004	89804004	89904004	226	9	0.37527	242	0.0275227	0.201714	0.380013	0.525083	0.607409	0.6608	0.691296	0.717179	0.459501	-1.20303	0.000788672	0.17086	0.741995	0.115647	0.947192	4.19469	2495.25	216.111	FALSE	FALSE	FALSE	0.195912424685387
1	89954004	89904004	90004004	133	5	0.38405	172	0.0266232	0.215252	0.39753	0.527615	0.630008	0.695852	0.747177	0.778854	0.429673	-1.46016	0.000449447	0.163919	0.791427	0.118688	0.741531	6.54286	13103.8	48.2858	FALSE	FALSE	FALSE	0.196080923785703
1	90054004	90004004	90104004	90	8	0.35497	152	0.0178197	0.198511	0.356245	0.440606	0.508287	0.571136	0.620779	0.665618	0.519831	-1.86202	0.000325996	0.202024	0.76967	0.0854247	0.235464	2.84091	551.442	4.4139	FALSE	FALSE	FALSE	0.196115946877209
1	90154004	90104004	90204004	76	10	0.34386	114	0.0126614	0.286162	0.475647	0.62837	0.683675	0.714476	0.742777	0.763616	0.386468	-2.20427	0.000355035	0.169711	0.814314	0.1117	0.293543	2.5	227.192	7.14376	FALSE	FALSE	FALSE	0.196174634117971
1	90354004	90304004	90404004	139	7	0.37166	167	0.0230306	0.321921	0.489135	0.611865	0.673259	0.715846	0.747495	0.771628	0.381264	-1.60863	0.000521475	0.204629	0.861601	0.117586	0.511509	7.15942	30454.1	54.2263	FALSE	FALSE	FALSE	0.196211708258321
1	90454004	90404004	90504004	92	5	0.35411	103	0.0140142	0.440689	0.7039	0.757167	0.787082	0.812726	0.83329	0.844779	0.260053	-1.75646	0.000449878	0.211292	0.911527	0.200533	0.259479	6.38636	19405.1	5.88776	FALSE	FALSE	FALSE	0.196286212445681
1	90554004	90504004	90604004	83	4	0.36652	142	0.0186406	0.42312	0.629487	0.721631	0.7697	0.796086	0.814534	0.83117	0.287753	-1.75656	0.000338899	0.253229	0.833233	0.15769	0.222997	7	75711.8	11.5605	FALSE	FALSE	FALSE	0.196301813804275
1	90654004	90604004	90704004	84	7	0.37754	85	0.0104073	0.393734	0.645903	0.742819	0.819351	0.864652	0.878757	0.889267	0.252217	-1.98181	0.000382918	0.229203	0.913158	0.170543	0.080141	7.05	118632	78.7904	FALSE	FALSE	FALSE	0.196373627788072
1	90754004	90704004	90804004	133	9	0.34952	143	0.020854	0.527494	0.636765	0.707174	0.768892	0.802497	0.818184	0.83458	0.272059	-0.771414	0.000643372	0.351976	0.815634	0.267274	1.92551	6.1194	54255.3	136.579	FALSE	FALSE	FALSE	0.196640869651074
1	90854004	90804004	90904004	151	11	0.34751	137	0.01766	0.506067	0.609641	0.69073	0.733241	0.771716	0.795951	0.818135	0.29636	-1.05716	0.000635829	0.363262	0.837569	0.195939	0.930146	4.06667	1593.42	10.7181	FALSE	FALSE	FALSE	0.196698610976864
1	90954004	90904004	91004004	83	6	0.36107	131	0.0247026	0.358716	0.491516	0.567834	0.630012	0.664291	0.697682	0.726204	0.409106	-1.24096	0.000318593	0.108167	0.724192	0.154648	0.663949	3.80952	67068.2	133.443	FALSE	FALSE	FALSE	0.196701724010694
1	91054004	91004004	91104004	200	5	0.40629	165	0.0192767	0.672817	0.754939	0.803166	0.839594	0.864627	0.886524	0.900628	0.182529	-0.430318	0.000687206	0.165686	0.885582	0.518228	8.35248	4.47059	79244.5	1756.62	FALSE	FALSE	FALSE	0.196780619554075
1	91154004	91104004	91204004	166	11	0.36629	228	0.0243237	0.344526	0.541568	0.63242	0.682752	0.726749	0.744194	0.761577	0.366602	-1.32013	0.000622131	0.163086	0.727752	0.157641	2.65375	4.83951	130894	395.661	FALSE	FALSE	FALSE	0.196807192031558
1	91254004	91204004	91304004	128	12	0.38342	142	0.021079	0.314141	0.454252	0.570179	0.644213	0.693815	0.733376	0.761134	0.404127	-1.64766	0.000467982	0.234182	0.87817	0.106749	0.122268	3.67188	109.195	0.764976	FALSE	FALSE	FALSE	0.196855709445218
1	91354004	91304004	91404004	102	11	0.35027	150	0.0145517	0.17586	0.342712	0.489836	0.578402	0.662302	0.694831	0.719861	0.476599	-1.9755	0.000344971	0.163977	0.849814	0.106896	0.0807445	3.86792	2119.25	5.49622	FALSE	FALSE	FALSE	0.197081656182236
1	91454004	91404004	91504004	135	7	0.3567	171	0.017843	0.314618	0.494254	0.605172	0.665146	0.704155	0.738945	0.767472	0.387177	-1.88482	0.000484303	0.171468	0.814841	0.121185	0.234255	6.14925	3252.81	7.68962	FALSE	FALSE	FALSE	0.197087604601437
1	91554004	91504004	91604004	83	9	0.34905	136	0.017504	0.374584	0.510097	0.588802	0.654408	0.692191	0.716824	0.738909	0.389169	-1.76434	0.000311296	0.184249	0.798215	0.118188	0.289447	3.57895	567.233	6.17828	FALSE	FALSE	FALSE	0.197136871380919
1	91654004	91604004	91704004	67	10	0.36665	99	0.0183986	0.387294	0.553975	0.620833	0.667095	0.704565	0.737544	0.762306	0.366627	-1.73213	0.000296679	0.224314	0.892805	0.13271	0.115973	5.58333	2832.89	5.97246	FALSE	FALSE	FALSE	0.197164325451196
1	91754004	91704004	91804004	76	10	0.37623	102	0.0173784	0.461638	0.564864	0.660827	0.703349	0.746979	0.785909	0.806181	0.324322	-1.91048	0.000378972	0.221294	0.890193	0.147628	0.0493253	5.36842	509.608	1.42296	FALSE	FALSE	FALSE	0.197168185044844
1	91854004	91804004	91904004	132	6	0.37009	170	0.0197256	0.33993	0.489602	0.596055	0.664542	0.716677	0.75958	0.782935	0.378668	-1.41987	0.000478849	0.189328	0.867611	0.115418	0.107121	2.59701	282.718	1.31431	FALSE	FALSE	FALSE	0.197276614269512
1	91954004	91904004	92004004	110	11	0.36667	158	0.0153802	0.263776	0.414274	0.486424	0.554652	0.59389	0.622899	0.648016	0.48801	-1.80541	0.000407635	0.187832	0.785883	0.0859252	0.238262	2.23077	154.592	1.42942	FALSE	FALSE	FALSE	0.197309961695103
1	92054004	92004004	92104004	216	10	0.37053	209	0.0257105	0.286279	0.493922	0.604961	0.668193	0.71065	0.739567	0.766616	0.389973	-0.71945	0.000748032	0.186062	0.737765	0.129258	0.529564	4.89189	34822.9	98.7379	TRUE	FALSE	FALSE	0.197319950698747
1	92154004	92104004	92204004	228	11	0.36741	153	0.024771	0.579035	0.655276	0.696162	0.731349	0.759682	0.790251	0.814687	0.281937	-1.06737	0.000726473	0.231585	0.839377	0.385892	0.598915	4.82143	109840	3055.71	FALSE	FALSE	FALSE	0.197578525974961
1	92254004	92204004	92304004	239	7	0.3754	174	0.0335254	0.416216	0.566162	0.637175	0.694137	0.730601	0.750557	0.771672	0.34764	-0.658559	0.000852481	0.166825	0.720711	0.247456	1.32351	5.32231	190837	2747.05	FALSE	FALSE	FALSE	0.197622645302044
1	92354004	92304004	92404004	195	9	0.37604	204	0.0455733	0.377135	0.471911	0.564448	0.607193	0.64323	0.670657	0.694261	0.424452	-0.841867	0.000916787	0.194782	0.669608	0.163976	1.16587	6.10309	71768.7	17.8507	FALSE	FALSE	FALSE	0.197661515461698
1	92454004	92404004	92504004	178	8	0.36169	158	0.0152639	0.231438	0.419082	0.517607	0.58445	0.630238	0.663005	0.687522	0.466665	-1.56164	0.000528826	0.0928153	0.693366	0.131138	0.42019	2.66292	4721.32	1282.25	FALSE	FALSE	FALSE	0.197662139013711
1	92554004	92504004	92604004	114	11	0.36507	128	0.0124683	0.255007	0.450948	0.581197	0.66826	0.724975	0.758649	0.780458	0.397215	-1.64755	0.000379776	0.185366	0.853445	0.119322	0.389306	3.08772	219.354	1.58627	FALSE	FALSE	FALSE	0.197731062304407
1	92654004	92604004	92704004	163	11	0.37585	199	0.0180191	0.246948	0.416522	0.562699	0.620573	0.668538	0.706547	0.738887	0.434184	-1.65232	0.000574933	0.189563	0.826515	0.117909	0.554987	4.75309	1369.22	75.467	FALSE	FALSE	FALSE	0.197760481412552
1	92754004	92704004	92804004	105	10	0.35343	172	0.0181491	0.25784	0.373823	0.473249	0.55867	0.622764	0.673227	0.714508	0.475131	-1.87113	0.000393498	0.190862	0.832336	0.0894958	0.161072	1.74074	31.1537	0.536454	FALSE	FALSE	FALSE	0.198055980688311
1	92854004	92804004	92904004	121	15	0.35779	178	0.0150735	0.154242	0.279442	0.379282	0.457076	0.526074	0.593976	0.640038	0.567124	-1.69607	0.000381826	0.140368	0.850346	0.0734616	0.127109	3.14754	442.98	6.54042	FALSE	FALSE	FALSE	0.198115705032903
1	92954004	92904004	93004004	156	10	0.36164	128	0.0114901	0.292663	0.416139	0.498431	0.558672	0.617106	0.669122	0.705201	0.463238	-1.75484	0.000521275	0.197967	0.85825	0.0969978	0.380297	5.17949	1395.97	11.8358	FALSE	FALSE	FALSE	0.198244549340545
1	93054004	93004004	93104004	121	9	0.36586	141	0.0128905	0.31704	0.458967	0.554276	0.628829	0.686671	0.726091	0.76306	0.409295	-1.77383	0.000402513	0.192129	0.86692	0.107651	0.297447	5.38983	1337.19	8.49884	FALSE	FALSE	FALSE	0.198323728220165
1	93154004	93104004	93204004	154	9	0.36885	202	0.0208282	0.283431	0.400505	0.51556	0.600183	0.682767	0.714245	0.737756	0.437936	-1.671	0.000478707	0.180376	0.849384	0.0934038	0.435691	4.85714	70300	86.7497	FALSE	FALSE	FALSE	0.19840128516907
1	93254004	93204004	93304004	448	11	0.37822	172	0.0183064	0.60571	0.674435	0.736752	0.777147	0.807889	0.826721	0.845414	0.246562	-0.103871	0.00145573	0.137132	0.85297	0.35229	4.24948	4.22667	49357	4153.05	FALSE	FALSE	FALSE	0.198526144670781
1	93354004	93304004	93404004	169	6	0.36365	163	0.0221428	0.422095	0.535453	0.638071	0.729165	0.756093	0.781916	0.802637	0.33351	-1.04165	0.000593254	0.181182	0.869367	0.188289	0.347769	6.96386	76312.8	105.292	FALSE	FALSE	FALSE	0.198813483086298
1	93454004	93404004	93504004	111	2	0.3945	147	0.0200578	0.578492	0.668722	0.743604	0.783256	0.824301	0.856394	0.878956	0.238039	-0.871163	0.000462132	0.404088	0.853974	0.206356	0.344219	4.47368	878.729	8.86029	FALSE	FALSE	FALSE	0.19886122833288
1	93554004	93504004	93604004	157	11	0.36245	143	0.0190282	0.419325	0.623008	0.678876	0.727458	0.772847	0.793026	0.818468	0.30957	-1.10555	0.00059511	0.35391	0.872398	0.165391	0.417505	5.83333	4497.21	47.9338	FALSE	FALSE	FALSE	0.19895649706756
1	93654004	93604004	93704004	207	10	0.35049	157	0.0143408	0.331121	0.541235	0.661622	0.717964	0.763159	0.793584	0.820163	0.338736	-0.656421	0.000792203	0.267724	0.829829	0.147526	0.679308	7.74038	46578.2	12.6521	FALSE	FALSE	FALSE	0.198997584935276
1	93754004	93704004	93804004	224	5	0.34816	191	0.0209456	0.356343	0.542556	0.625974	0.674761	0.711495	0.740672	0.781563	0.366662	-1.31825	0.000730228	0.244763	0.846536	0.139082	0.434207	4.34545	2584.64	8.42848	FALSE	FALSE	FALSE	0.199036896184224
1	93854004	93804004	93904004	297	6	0.34332	165	0.0174703	0.542247	0.709671	0.750069	0.782673	0.805024	0.827108	0.846837	0.248053	-0.778726	0.000990795	0.30689	0.913425	0.248054	2.99659	5.71053	76185.6	2053.55	FALSE	FALSE	TRUE	0.199059960247326
1	93954004	93904004	94004004	298	9	0.36608	188	0.0210417	0.497483	0.590877	0.672035	0.70607	0.738462	0.764361	0.787563	0.32045	-0.135226	0.00110894	0.216328	0.811617	0.262131	2.98882	5.56849	106040	1350.91	FALSE	FALSE	FALSE	0.19911961162061
1	94054004	94004004	94104004	162	7	0.36837	150	0.023022	0.448131	0.536237	0.615981	0.673393	0.717606	0.74561	0.767519	0.356503	-0.811824	0.000669362	0.103473	0.811017	0.176328	0.784652	4.30488	1680.98	18.2257	FALSE	FALSE	FALSE	0.199148458720162
1	94154004	94104004	94204004	183	10	0.37485	195	0.021583	0.291652	0.468803	0.560288	0.622274	0.662828	0.697573	0.723998	0.424655	-1.00612	0.000594296	0.162411	0.837235	0.120368	0.308076	6.18681	3341.1	15.1	FALSE	FALSE	FALSE	0.199174076931793
1	94254004	94204004	94304004	121	5	0.37517	113	0.0182962	0.373034	0.598015	0.705506	0.75481	0.803171	0.831106	0.847219	0.298163	-1.1829	0.000533875	0.185883	0.929414	0.148359	0.30375	4.25862	255.983	3.32393	FALSE	FALSE	FALSE	0.199279851065814
1	94354004	94304004	94404004	93	4	0.36931	114	0.0148103	0.218864	0.405084	0.55488	0.662278	0.712403	0.752899	0.788484	0.415015	-1.6572	0.000445257	0.182589	0.921209	0.109697	0.348723	4.06	1061.72	2.23994	FALSE	FALSE	FALSE	0.199314613721476
1	94454004	94404004	94504004	167	7	0.37112	170	0.0196588	0.25887	0.384099	0.477934	0.55439	0.617228	0.666281	0.709912	0.475898	-1.49718	0.000521269	0.157608	0.844842	0.093853	0.222865	4.31325	401.88	6.40556	FALSE	FALSE	FALSE	0.199444214057874
1	94554004	94504004	94604004	157	12	0.33923	181	0.0219525	0.385956	0.519933	0.577491	0.629574	0.671802	0.697141	0.727596	0.398644	-1.54647	0.000590991	0.133314	0.80113	0.114382	2.09858	3.925	740.854	43.9714	FALSE	FALSE	FALSE	0.199482564731483
1	94654004	94604004	94704004	75	7	0.37569	102	0.0161006	0.338923	0.485851	0.591166	0.660042	0.708187	0.745912	0.773005	0.385273	-1.90444	0.000296379	0.210707	0.856262	0.115871	0.264347	3.83333	382.155	3.53443	FALSE	FALSE	FALSE	0.199720111189177
1	94754004	94704004	94804004	120	9	0.34566	149	0.0196017	0.424363	0.568995	0.630771	0.685322	0.739023	0.766282	0.789039	0.342315	-1.81787	0.000537779	0.203472	0.852119	0.126278	0.114191	3.55738	337.951	1.91482	FALSE	FALSE	FALSE	0.199792050745312
1	94854004	94804004	94904004	208	11	0.35304	212	0.026276	0.478421	0.569887	0.625245	0.657497	0.680375	0.700825	0.718589	0.367023	-0.830869	0.000902764	0.271855	0.656105	0.169201	1.881	3.69903	1603.12	141.898	FALSE	FALSE	FALSE	0.199898160483565
1	94954004	94904004	95004004	216	10	0.35459	173	0.019392	0.547878	0.635237	0.683074	0.72078	0.745997	0.768552	0.787359	0.301589	-0.715933	0.000921661	0.314618	0.774127	0.203483	1.55363	3.58879	1569.32	310.228	FALSE	FALSE	FALSE	0.200001939262194
1	95054004	95004004	95104004	157	8	0.37561	147	0.0171454	0.351653	0.559694	0.616679	0.664771	0.717476	0.753958	0.790802	0.363567	-1.44221	0.00055287	0.224249	0.860708	0.134611	0.191854	5.6875	5457.13	10.9646	FALSE	FALSE	FALSE	0.200010141865891
1	95154004	95104004	95204004	87	7	0.38951	87	0.0160486	0.29852	0.455315	0.596781	0.709645	0.790134	0.819895	0.845889	0.354832	-1.76189	0.000307577	0.190658	0.895379	0.140536	0.205932	7.53488	41895	7.8134	FALSE	FALSE	FALSE	0.200129017936344
1	95254004	95204004	95304004	163	5	0.35987	155	0.0196782	0.310429	0.469783	0.591789	0.658419	0.708264	0.748543	0.786487	0.389469	-1.71464	0.000566828	0.211116	0.849497	0.127299	0.695246	5.95	2295.03	7.77721	FALSE	FALSE	FALSE	0.200204446702491
1	95354004	95304004	95404004	179	8	0.36467	138	0.0157057	0.258734	0.453344	0.548789	0.619817	0.686533	0.736302	0.774864	0.417374	-1.57033	0.000578015	0.168344	0.870225	0.109773	0.547908	5.44444	965.588	5.54387	FALSE	FALSE	FALSE	0.200224889737756
1	95454004	95404004	95504004	82	6	0.35885	104	0.0160301	0.309141	0.45511	0.57053	0.677476	0.731975	0.779475	0.806546	0.381393	-1.83565	0.000320084	0.187232	0.895669	0.110268	0.128643	5.69767	2301.6	3.5326	FALSE	FALSE	FALSE	0.200387893647474
[truncated: 4,112 more rows]

## Sheet: Candidate genes
GeneID	Closest AtID	Freq (Methods + Replicates + Traits)	Annotation	Window start	Window end	HAPk score
[truncated: 24 more rows]

[truncated: 8 more sheets: SynCom, Syncom OTUs LORE1, Syncom OTUs LORE1 metadata, OTUs Utobara LORE1, OTU families Utobara LORE1, OTUs Utobara LORE1 metadata, OTUs Utobara haplotype, OTUs Utobara haplotype metadata]
